# Supplementary material for: Intermolecular [3+3] ring expansion of aziridines to dehydropiperi-dines through the intermediacy of aziridinium ylides
Source: PubMed Central journal article supplement (PMC7062875; doi:10.1038/s41467-020-15134-x), 2020-03-09
Supplement: 41467_2020_15134_MOESM2_ESM.pdf [file 41467_2020_15134_MOESM2_ESM.pdf]

## Description of Additional Supplementary Files

File Name: Supplementary Data 1

Description: Intermolecular [3+3] Ring-Expansion of Aziridines to Dehydropiperidines through the Intermediacy of Aziridinium Ylides
