# Supplementary material for: Intermolecular [3+3] ring expansion of aziridines to dehydropiperi-dines through the intermediacy of aziridinium ylides
Source: PubMed Central journal article supplement (PMC7062875; doi:10.1038/s41467-020-15134-x), 2020-03-09
Supplement: 41467_2020_15134_MOESM3_ESM.pdf [file 41467_2020_15134_MOESM3_ESM.pdf]

## Supplementary Data File 1

### 2b, E = -439.426005

|   |              |              |              |
|---|--------------|--------------|--------------|
| N | 0.262344000  | -0.539114000 | -0.948473000 |
| C | 0.848806000  | 0.795236000  | -0.891354000 |
| C | 1.583461000  | -0.383547000 | -0.320214000 |
| H | 1.209079000  | 1.138283000  | -1.868937000 |
| C | 0.104868000  | 1.866386000  | -0.112266000 |
| C | -1.045236000 | 1.299079000  | 0.724484000  |
| O | -1.687216000 | 0.161318000  | 0.109043000  |
| C | -0.886730000 | -0.877142000 | -0.241211000 |
| O | -1.217593000 | -2.017801000 | -0.020856000 |
| H | -0.707954000 | 0.995664000  | 1.728914000  |
| H | -1.838113000 | 2.046650000  | 0.858032000  |
| H | 0.784812000  | 2.436048000  | 0.541734000  |
| H | -0.304495000 | 2.575161000  | -0.847857000 |
| H | 2.392151000  | -0.783004000 | -0.945054000 |
| C | 1.781988000  | -0.639707000 | 1.151603000  |
| H | 1.020096000  | -0.160260000 | 1.780849000  |
| H | 1.754373000  | -1.722168000 | 1.356808000  |
| H | 2.769158000  | -0.262542000 | 1.463080000  |

### 3a-Rh<sub>2</sub>, E = -1711.649206

|    |              |              |              |
|----|--------------|--------------|--------------|
| Rh | 0.466384000  | 0.261091000  | 0.002211000  |
| C  | -0.921406000 | 1.726662000  | 0.051352000  |
| Rh | 2.143460000  | -1.548448000 | 0.016834000  |
| O  | 1.031665000  | -2.429618000 | 1.518524000  |
| C  | -0.036508000 | -1.887091000 | 1.915309000  |
| O  | -0.512866000 | -0.786395000 | 1.481126000  |
| O  | 3.171180000  | -0.438473000 | 1.423076000  |
| C  | 2.706427000  | 0.668584000  | 1.816805000  |
| O  | 1.627105000  | 1.207294000  | 1.408682000  |
| O  | 0.973308000  | -2.511985000 | -1.387086000 |
| C  | -0.085317000 | -1.967712000 | -1.805624000 |
| O  | -0.535128000 | -0.835002000 | -1.427935000 |
| O  | 3.115392000  | -0.531635000 | -1.492077000 |
| C  | 2.643516000  | 0.563299000  | -1.913119000 |
| O  | 1.589194000  | 1.132230000  | -1.484998000 |
| C  | 3.362053000  | 1.245204000  | -3.049706000 |
| H  | 4.435006000  | 1.011529000  | -3.021870000 |
| H  | 2.949865000  | 0.863075000  | -3.998852000 |
| H  | 3.199433000  | 2.330865000  | -3.016806000 |
| C  | -0.893070000 | -2.682607000 | -2.857986000 |
| H  | -0.760636000 | -2.158675000 | -3.818966000 |
| H  | -0.562613000 | -3.723527000 | -2.965897000 |
| H  | -1.962635000 | -2.642307000 | -2.603889000 |
| C  | 3.460634000  | 1.406317000  | 2.892893000  |
| H  | 4.535678000  | 1.190555000  | 2.826800000  |
| H  | 3.274389000  | 2.486678000  | 2.828429000  |
| H  | 3.097061000  | 1.051623000  | 3.872175000  |
| C  | -0.821723000 | -2.561953000 | 3.010089000  |
| H  | -0.479079000 | -3.593822000 | 3.159316000  |
| H  | -0.680993000 | -1.995072000 | 3.945149000  |
| H  | -1.894736000 | -2.542704000 | 2.769068000  |

|   |              |              |              |
|---|--------------|--------------|--------------|
| C | -2.321491000 | 1.603928000  | 0.055330000  |
| H | -2.927013000 | 2.513946000  | 0.146065000  |
| C | -2.960129000 | 0.378729000  | -0.038198000 |
| H | -2.329235000 | -0.506859000 | -0.115992000 |
| C | -4.380833000 | 0.135519000  | -0.044399000 |
| C | -5.351660000 | 1.164610000  | 0.052484000  |
| C | -4.821986000 | -1.207422000 | -0.147100000 |
| C | -6.706634000 | 0.853875000  | 0.046297000  |
| C | -6.180508000 | -1.512682000 | -0.153711000 |
| C | -7.124260000 | -0.482580000 | -0.056288000 |
| H | -5.039461000 | 2.207509000  | 0.132151000  |
| H | -4.078154000 | -2.005423000 | -0.220092000 |
| H | -7.448725000 | 1.652385000  | 0.121049000  |
| H | -6.508173000 | -2.551821000 | -0.233512000 |
| H | -8.191534000 | -0.718927000 | -0.060761000 |
| C | -0.389108000 | 3.092521000  | 0.276553000  |
| O | -0.409681000 | 3.609455000  | 1.375222000  |
| O | 0.132593000  | 3.651397000  | -0.814353000 |
| C | 0.767162000  | 4.926551000  | -0.644158000 |
| H | 0.054698000  | 5.674557000  | -0.263200000 |
| H | 1.611817000  | 4.844713000  | 0.057102000  |
| H | 1.129000000  | 5.222121000  | -1.636888000 |

**TS1, E = -2151.068188**

|    |              |              |              |
|----|--------------|--------------|--------------|
| Rh | 0.751513000  | -0.216715000 | 0.158461000  |
| C  | -1.027164000 | 0.649616000  | 0.885287000  |
| N  | -1.523895000 | 2.220884000  | -0.424767000 |
| C  | -2.890828000 | 2.109258000  | -0.980991000 |
| C  | -1.703743000 | 1.783865000  | -1.826935000 |
| H  | -3.409076000 | 1.225799000  | -0.599860000 |
| C  | -3.774646000 | 3.344961000  | -0.997127000 |
| C  | -3.035507000 | 4.635940000  | -0.637811000 |
| O  | -1.957455000 | 4.389202000  | 0.295512000  |
| C  | -1.015887000 | 3.546976000  | -0.189994000 |
| O  | 0.107047000  | 3.888910000  | -0.409943000 |
| H  | -2.609140000 | 5.129818000  | -1.526774000 |
| H  | -3.703175000 | 5.351984000  | -0.142399000 |
| H  | -4.261835000 | 3.458012000  | -1.978707000 |
| H  | -4.571763000 | 3.174067000  | -0.258774000 |
| Rh | 2.876961000  | -1.279549000 | -0.522855000 |
| O  | 2.235361000  | -2.966833000 | 0.485012000  |
| C  | 1.128943000  | -2.955118000 | 1.096373000  |
| O  | 0.330430000  | -1.968013000 | 1.166881000  |
| O  | 3.694027000  | -0.537550000 | 1.220959000  |
| C  | 2.992663000  | 0.189539000  | 1.980636000  |
| O  | 1.773341000  | 0.498321000  | 1.793330000  |
| O  | 1.899645000  | -1.936229000 | -2.223234000 |
| C  | 0.674506000  | -1.683640000 | -2.383180000 |
| O  | -0.057490000 | -1.022394000 | -1.575310000 |
| O  | 3.344325000  | 0.492887000  | -1.477729000 |
| C  | 2.479400000  | 1.417636000  | -1.514619000 |
| O  | 1.335789000  | 1.384499000  | -0.967449000 |
| C  | 2.806334000  | 2.660595000  | -2.303426000 |
| H  | 3.883916000  | 2.871794000  | -2.259666000 |

|   |              |              |              |
|---|--------------|--------------|--------------|
| H | 2.537919000  | 2.484022000  | -3.358601000 |
| H | 2.220061000  | 3.508137000  | -1.926599000 |
| C | -0.011308000 | -2.204230000 | -3.621242000 |
| H | 0.704223000  | -2.695975000 | -4.292189000 |
| H | -0.792671000 | -2.922520000 | -3.324958000 |
| H | -0.509370000 | -1.373212000 | -4.144154000 |
| C | 3.642102000  | 0.772246000  | 3.210824000  |
| H | 3.776947000  | 1.855669000  | 3.059049000  |
| H | 2.983185000  | 0.636094000  | 4.081030000  |
| H | 4.619894000  | 0.309263000  | 3.396104000  |
| C | 0.700134000  | -4.206421000 | 1.821530000  |
| H | -0.334323000 | -4.458556000 | 1.542840000  |
| H | 1.371071000  | -5.044927000 | 1.595092000  |
| H | 0.709744000  | -4.011528000 | 2.906129000  |
| H | -1.489243000 | 0.714497000  | -1.919776000 |
| C | -1.179634000 | 2.606188000  | -2.972941000 |
| H | -1.459241000 | 3.667613000  | -2.919074000 |
| H | -0.083193000 | 2.534257000  | -3.001025000 |
| H | -1.580534000 | 2.196362000  | -3.913319000 |
| C | -2.282024000 | -0.082158000 | 0.927701000  |
| H | -3.034206000 | 0.268254000  | 1.644614000  |
| C | -2.543873000 | -1.193977000 | 0.190363000  |
| H | -1.768900000 | -1.545543000 | -0.491170000 |
| C | -3.761981000 | -2.000171000 | 0.223412000  |
| C | -4.912587000 | -1.648339000 | 0.964975000  |
| C | -3.787415000 | -3.199346000 | -0.521611000 |
| C | -6.037882000 | -2.470069000 | 0.961950000  |
| C | -4.914457000 | -4.022725000 | -0.521642000 |
| C | -6.043439000 | -3.660670000 | 0.221010000  |
| H | -4.928167000 | -0.722641000 | 1.543911000  |
| H | -2.904363000 | -3.483497000 | -1.100597000 |
| H | -6.919996000 | -2.183650000 | 1.540526000  |
| H | -4.913009000 | -4.949145000 | -1.101581000 |
| H | -6.928567000 | -4.302189000 | 0.222599000  |
| C | -0.790397000 | 1.384307000  | 2.167061000  |
| O | -0.989710000 | 0.839408000  | 3.236025000  |
| O | -0.289104000 | 2.611505000  | 2.055892000  |
| C | 0.088708000  | 3.279835000  | 3.259600000  |
| H | -0.770083000 | 3.382873000  | 3.940903000  |
| H | 0.891331000  | 2.725976000  | 3.769351000  |
| H | 0.448751000  | 4.270305000  | 2.953378000  |

**INT1, E = -2151.083394**

|    |              |              |              |
|----|--------------|--------------|--------------|
| Rh | 0.552639000  | -0.412020000 | 0.176635000  |
| C  | -0.583800000 | 1.501855000  | 0.728913000  |
| N  | -0.162627000 | 2.592852000  | -0.234180000 |
| C  | -1.188247000 | 3.513646000  | -0.869402000 |
| C  | -0.540403000 | 2.477203000  | -1.710173000 |
| H  | -2.189328000 | 3.267914000  | -0.512371000 |
| C  | -0.886604000 | 4.983397000  | -0.817794000 |
| C  | 0.560200000  | 5.284100000  | -1.120845000 |
| O  | 1.450480000  | 4.377797000  | -0.421308000 |
| C  | 1.184351000  | 3.185586000  | 0.082552000  |
| O  | 1.966471000  | 2.596099000  | 0.755490000  |
| H  | 0.786661000  | 5.206420000  | -2.192743000 |
| H  | 0.850277000  | 6.286621000  | -0.780942000 |

|    |              |              |              |
|----|--------------|--------------|--------------|
| H  | -1.531863000 | 5.510099000  | -1.538200000 |
| H  | -1.151942000 | 5.339531000  | 0.189610000  |
| Rh | 1.714589000  | -2.472174000 | -0.501687000 |
| O  | 0.371814000  | -3.518113000 | 0.663735000  |
| C  | -0.510636000 | -2.889214000 | 1.318438000  |
| O  | -0.657759000 | -1.628794000 | 1.339903000  |
| O  | 2.923721000  | -2.206841000 | 1.146924000  |
| C  | 2.749027000  | -1.201903000 | 1.901431000  |
| O  | 1.876073000  | -0.298451000 | 1.744489000  |
| O  | 0.404187000  | -2.581605000 | -2.103474000 |
| C  | -0.481758000 | -1.691652000 | -2.249668000 |
| O  | -0.654832000 | -0.689080000 | -1.488298000 |
| O  | 2.981486000  | -1.287218000 | -1.619035000 |
| C  | 2.773568000  | -0.040672000 | -1.681622000 |
| O  | 1.842908000  | 0.583601000  | -1.086467000 |
| C  | 3.683382000  | 0.777693000  | -2.564559000 |
| H  | 4.661978000  | 0.289764000  | -2.667234000 |
| H  | 3.229918000  | 0.853791000  | -3.566949000 |
| H  | 3.800462000  | 1.792938000  | -2.161581000 |
| C  | -1.442325000 | -1.819628000 | -3.406019000 |
| H  | -1.466110000 | -0.877909000 | -3.975371000 |
| H  | -1.164470000 | -2.652246000 | -4.064769000 |
| H  | -2.455482000 | -1.986608000 | -3.005687000 |
| C  | 3.641467000  | -1.093329000 | 3.113820000  |
| H  | 4.667979000  | -1.393024000 | 2.858028000  |
| H  | 3.627865000  | -0.074023000 | 3.521184000  |
| H  | 3.269211000  | -1.788962000 | 3.884398000  |
| C  | -1.503364000 | -3.702825000 | 2.111259000  |
| H  | -1.078884000 | -4.678563000 | 2.383026000  |
| H  | -1.821295000 | -3.155787000 | 3.009224000  |
| H  | -2.391930000 | -3.872892000 | 1.480556000  |
| H  | -1.128680000 | 1.567934000  | -1.832385000 |
| C  | 0.461436000  | 2.629394000  | -2.827099000 |
| H  | 1.361447000  | 3.199562000  | -2.574578000 |
| H  | 0.779245000  | 1.630159000  | -3.145895000 |
| H  | -0.041370000 | 3.127324000  | -3.671115000 |
| C  | -1.931293000 | 0.915111000  | 0.652338000  |
| H  | -2.076395000 | 0.328660000  | 1.562499000  |
| C  | -2.940975000 | 0.853496000  | -0.250715000 |
| H  | -2.935223000 | 1.422911000  | -1.180954000 |
| C  | -4.112281000 | -0.021578000 | -0.102729000 |
| C  | -4.131520000 | -1.134461000 | 0.769784000  |
| C  | -5.268256000 | 0.221668000  | -0.877008000 |
| C  | -5.263477000 | -1.943290000 | 0.878471000  |
| C  | -6.399279000 | -0.591465000 | -0.769520000 |
| C  | -6.407478000 | -1.676982000 | 0.113926000  |
| H  | -3.234374000 | -1.383684000 | 1.339708000  |
| H  | -5.275269000 | 1.067432000  | -1.571563000 |
| H  | -5.248587000 | -2.799772000 | 1.558902000  |
| H  | -7.281018000 | -0.375420000 | -1.379716000 |
| H  | -7.290622000 | -2.315846000 | 0.197911000  |
| C  | -0.379112000 | 1.978330000  | 2.142929000  |
| O  | -0.403124000 | 1.278684000  | 3.126474000  |
| O  | -0.261440000 | 3.329113000  | 2.218598000  |
| C  | 0.043413000  | 3.879789000  | 3.503253000  |
| H  | -0.737641000 | 3.622751000  | 4.234574000  |

|   |             |             |             |
|---|-------------|-------------|-------------|
| H | 1.012878000 | 3.504736000 | 3.866472000 |
| H | 0.089622000 | 4.967846000 | 3.366547000 |

**INT2, E = -1015.282384**

|   |              |              |              |
|---|--------------|--------------|--------------|
| C | 0.551999000  | 0.900073000  | -0.188694000 |
| N | 1.291218000  | -0.356331000 | -0.158447000 |
| C | 2.223648000  | -0.664503000 | -1.321619000 |
| C | 0.965874000  | -1.429910000 | -1.225566000 |
| H | 2.198205000  | 0.162463000  | -2.033650000 |
| C | 3.612563000  | -1.103175000 | -0.956863000 |
| C | 3.646624000  | -2.026905000 | 0.238429000  |
| O | 2.782986000  | -1.564965000 | 1.310112000  |
| C | 1.696346000  | -0.823849000 | 1.203292000  |
| O | 1.043180000  | -0.500669000 | 2.147294000  |
| H | 3.339366000  | -3.050826000 | -0.013497000 |
| H | 4.647945000  | -2.072080000 | 0.684433000  |
| H | 4.070632000  | -1.609231000 | -1.820943000 |
| H | 4.193493000  | -0.192347000 | -0.751386000 |
| H | 0.173093000  | -1.029440000 | -1.861345000 |
| C | 0.748594000  | -2.868744000 | -0.838433000 |
| H | 1.278721000  | -3.187546000 | 0.066573000  |
| H | -0.324046000 | -3.048874000 | -0.682824000 |
| H | 1.084657000  | -3.505399000 | -1.671955000 |
| C | -0.863137000 | 0.908104000  | -0.139037000 |
| C | 1.334374000  | 2.093090000  | -0.089885000 |
| O | 0.920973000  | 3.246893000  | -0.104707000 |
| O | 2.682470000  | 1.819123000  | 0.040120000  |
| C | 3.544891000  | 2.947220000  | 0.129306000  |
| H | 3.500585000  | 3.561379000  | -0.785312000 |
| H | 3.285076000  | 3.586415000  | 0.988339000  |
| H | 4.562280000  | 2.552326000  | 0.257952000  |
| C | -1.734808000 | -0.138431000 | 0.011588000  |
| H | -1.333163000 | -1.138843000 | 0.196350000  |
| C | -3.190670000 | -0.055663000 | 0.005372000  |
| C | -3.914857000 | 1.132128000  | -0.271732000 |
| C | -3.954290000 | -1.216366000 | 0.287249000  |
| C | -5.309094000 | 1.153775000  | -0.253648000 |
| H | -3.374801000 | 2.052438000  | -0.507477000 |
| C | -5.349877000 | -1.192705000 | 0.301150000  |
| H | -3.429431000 | -2.152546000 | 0.503079000  |
| C | -6.043444000 | -0.006344000 | 0.032237000  |
| H | -5.833000000 | 2.089839000  | -0.469969000 |
| H | -5.902293000 | -2.110502000 | 0.524686000  |
| H | -7.136351000 | 0.015152000  | 0.042068000  |
| H | -1.264791000 | 1.922108000  | -0.237432000 |

**TS2, E = -1015.264461**

|   |             |              |              |
|---|-------------|--------------|--------------|
| C | 0.442061000 | 0.843680000  | 0.190551000  |
| N | 1.104025000 | -0.324226000 | 0.333571000  |
| C | 2.050918000 | -1.167322000 | -1.657013000 |
| C | 0.923963000 | -1.546818000 | -0.883962000 |
| H | 1.883321000 | -0.345410000 | -2.358742000 |
| C | 3.471498000 | -1.503649000 | -1.386633000 |
| C | 3.693714000 | -2.097614000 | -0.011546000 |

|   |              |              |              |
|---|--------------|--------------|--------------|
| O | 3.171297000  | -1.312560000 | 1.080461000  |
| C | 2.206744000  | -0.389707000 | 1.215314000  |
| O | 2.240222000  | 0.323280000  | 2.192791000  |
| H | 3.269710000  | -3.108344000 | 0.059546000  |
| H | 4.769312000  | -2.177926000 | 0.201629000  |
| H | 3.874887000  | -2.227612000 | -2.124650000 |
| H | 4.082177000  | -0.591001000 | -1.507827000 |
| H | -0.012676000 | -1.205290000 | -1.336901000 |
| C | 0.716348000  | -2.878577000 | -0.180600000 |
| H | 1.363085000  | -3.021901000 | 0.693146000  |
| H | -0.322797000 | -2.952922000 | 0.169553000  |
| H | 0.897401000  | -3.706453000 | -0.883566000 |
| C | -0.980545000 | 0.909194000  | 0.063915000  |
| C | 1.203112000  | 2.095850000  | -0.001919000 |
| O | 0.737889000  | 3.216541000  | 0.088964000  |
| O | 2.489292000  | 1.859662000  | -0.340034000 |
| C | 3.341977000  | 2.999373000  | -0.453981000 |
| H | 2.963147000  | 3.705621000  | -1.209149000 |
| H | 3.422742000  | 3.523149000  | 0.511802000  |
| H | 4.326450000  | 2.618944000  | -0.755477000 |
| C | -1.850812000 | -0.119527000 | 0.293201000  |
| H | -1.446367000 | -1.060653000 | 0.676554000  |
| C | -3.298131000 | -0.089919000 | 0.117269000  |
| C | -3.994310000 | 1.017967000  | -0.423566000 |
| C | -4.058093000 | -1.219931000 | 0.500004000  |
| C | -5.380657000 | 0.994624000  | -0.562022000 |
| H | -3.442299000 | 1.904892000  | -0.742271000 |
| C | -5.446467000 | -1.241501000 | 0.358033000  |
| H | -3.541969000 | -2.088941000 | 0.918664000  |
| C | -6.117039000 | -0.133815000 | -0.173232000 |
| H | -5.894889000 | 1.863626000  | -0.981748000 |
| H | -6.009224000 | -2.127964000 | 0.663349000  |
| H | -7.204189000 | -0.148046000 | -0.286230000 |
| H | -1.361280000 | 1.886581000  | -0.243028000 |

**TS2', E = -1015.274842**

|   |              |              |              |
|---|--------------|--------------|--------------|
| C | 0.670116000  | 0.994794000  | 0.080088000  |
| N | 1.337729000  | -0.248494000 | 0.065774000  |
| C | 2.178138000  | -0.643629000 | -1.133166000 |
| C | 0.954988000  | -1.380866000 | -1.458926000 |
| H | 2.335631000  | 0.243951000  | -1.749581000 |
| C | 3.494612000  | -1.261303000 | -0.730051000 |
| C | 3.327378000  | -2.348307000 | 0.309574000  |
| O | 2.311939000  | -2.030058000 | 1.291233000  |
| C | 1.455428000  | -1.006110000 | 1.275555000  |
| O | 0.808037000  | -0.739566000 | 2.250634000  |
| H | 3.042650000  | -3.310973000 | -0.135350000 |
| H | 4.254033000  | -2.503100000 | 0.879827000  |
| H | 4.003647000  | -1.670628000 | -1.615807000 |
| H | 4.110009000  | -0.439891000 | -0.333927000 |
| H | 0.196539000  | -0.776126000 | -1.961278000 |
| C | 0.649842000  | -2.821187000 | -1.259263000 |
| H | -0.357820000 | -3.050491000 | -1.629772000 |
| H | 1.386885000  | -3.445732000 | -1.795528000 |

|   |              |              |              |
|---|--------------|--------------|--------------|
| H | 0.694095000  | -3.130913000 | -0.201240000 |
| C | -0.746778000 | 1.042578000  | 0.102383000  |
| C | 1.456695000  | 2.199013000  | -0.035771000 |
| O | 1.019668000  | 3.341862000  | -0.077500000 |
| O | 2.805418000  | 1.949683000  | -0.079504000 |
| C | 3.650052000  | 3.092232000  | -0.179202000 |
| H | 3.440603000  | 3.671552000  | -1.093234000 |
| H | 3.524245000  | 3.759022000  | 0.688924000  |
| H | 4.681199000  | 2.714443000  | -0.209273000 |
| C | -1.607419000 | -0.024393000 | 0.136666000  |
| H | -1.192320000 | -1.029011000 | 0.254013000  |
| C | -3.062390000 | 0.034998000  | 0.053388000  |
| C | -3.798257000 | 1.242609000  | -0.047982000 |
| C | -3.807007000 | -1.170233000 | 0.070403000  |
| C | -5.190248000 | 1.238243000  | -0.127071000 |
| H | -3.270822000 | 2.199358000  | -0.064071000 |
| C | -5.200546000 | -1.172142000 | -0.011729000 |
| H | -3.270447000 | -2.120758000 | 0.150927000  |
| C | -5.906576000 | 0.032672000  | -0.110882000 |
| H | -5.725918000 | 2.189207000  | -0.202873000 |
| H | -5.740760000 | -2.123378000 | 0.004321000  |
| H | -6.997920000 | 0.034600000  | -0.173527000 |
| H | -1.146305000 | 2.059141000  | 0.044034000  |

### INT3, E = -1015.335060

|   |              |              |              |
|---|--------------|--------------|--------------|
| N | 1.270914000  | -0.066270000 | -1.148547000 |
| C | 1.522818000  | 1.857512000  | 1.286335000  |
| C | 0.275738000  | 1.951571000  | 1.776471000  |
| H | 2.092391000  | 0.952971000  | 1.524670000  |
| C | 2.228135000  | 2.851299000  | 0.401651000  |
| C | 2.298418000  | 2.459541000  | -1.075763000 |
| O | 3.123998000  | 1.299340000  | -1.310045000 |
| C | 2.639979000  | 0.051498000  | -1.378632000 |
| O | 3.368593000  | -0.863521000 | -1.700042000 |
| H | 1.293637000  | 2.293973000  | -1.489580000 |
| H | 2.788671000  | 3.261616000  | -1.647406000 |
| H | 1.737500000  | 3.837263000  | 0.437841000  |
| H | 3.261841000  | 2.996752000  | 0.761306000  |
| H | -0.081504000 | 1.121437000  | 2.399554000  |
| C | -0.717641000 | 3.056192000  | 1.564732000  |
| H | -0.341017000 | 3.861867000  | 0.917427000  |
| H | -1.642095000 | 2.660629000  | 1.107045000  |
| H | -1.022193000 | 3.504725000  | 2.527472000  |
| C | -1.553048000 | -0.270349000 | -0.580552000 |
| H | -1.168506000 | 0.654666000  | -1.022115000 |
| C | -0.643790000 | -1.222734000 | -0.254232000 |
| H | -0.939502000 | -2.158184000 | 0.225142000  |
| C | 0.785016000  | -1.027755000 | -0.444357000 |
| C | -2.997730000 | -0.320979000 | -0.383072000 |
| C | -3.664667000 | -1.441314000 | 0.162803000  |
| C | -3.766045000 | 0.807349000  | -0.744513000 |
| C | -5.046000000 | -1.426221000 | 0.340003000  |
| C | -5.150396000 | 0.820236000  | -0.565132000 |

|   |              |              |              |
|---|--------------|--------------|--------------|
| C | -5.794249000 | -0.296204000 | -0.021414000 |
| H | -3.098160000 | -2.329763000 | 0.449202000  |
| H | -3.262797000 | 1.679218000  | -1.171473000 |
| H | -5.547188000 | -2.300240000 | 0.763807000  |
| H | -5.728532000 | 1.703135000  | -0.849405000 |
| H | -6.877974000 | -0.289440000 | 0.121463000  |
| C | 1.665738000  | -2.051267000 | 0.262277000  |
| O | 1.510214000  | -3.241337000 | 0.134374000  |
| O | 2.571429000  | -1.470335000 | 1.044027000  |
| C | 3.534939000  | -2.329356000 | 1.675408000  |
| H | 3.032620000  | -3.090924000 | 2.290407000  |
| H | 4.154229000  | -2.824454000 | 0.912330000  |
| H | 4.155003000  | -1.678645000 | 2.303556000  |

**TS3, E = -1015.302020**

|   |              |              |              |
|---|--------------|--------------|--------------|
| N | 1.396743000  | 0.390498000  | -0.582141000 |
| C | 0.650374000  | 1.368615000  | 1.206916000  |
| C | -0.753846000 | 1.257546000  | 1.183544000  |
| H | 1.184648000  | 0.596508000  | 1.762839000  |
| C | 1.385591000  | 2.680483000  | 1.057392000  |
| C | 1.933291000  | 2.954170000  | -0.341072000 |
| O | 2.972050000  | 2.044352000  | -0.712378000 |
| C | 2.680252000  | 0.743414000  | -0.931084000 |
| O | 3.507938000  | 0.029155000  | -1.464526000 |
| H | 1.126355000  | 2.923229000  | -1.090743000 |
| H | 2.402804000  | 3.947495000  | -0.372293000 |
| H | 0.733574000  | 3.528137000  | 1.322680000  |
| H | 2.234626000  | 2.693644000  | 1.759300000  |
| H | -1.177472000 | 0.515965000  | 1.864903000  |
| C | -1.625171000 | 2.445519000  | 0.871864000  |
| H | -1.300815000 | 2.967764000  | -0.042347000 |
| H | -2.676300000 | 2.152224000  | 0.743438000  |
| H | -1.593236000 | 3.179025000  | 1.698092000  |
| C | -1.267377000 | -0.145520000 | -0.462806000 |
| H | -0.982349000 | 0.684545000  | -1.112439000 |
| C | -0.320836000 | -1.184121000 | -0.349221000 |
| H | -0.622170000 | -2.191779000 | -0.055758000 |
| C | 1.034781000  | -0.888841000 | -0.442555000 |
| C | -2.713802000 | -0.376652000 | -0.314289000 |
| C | -3.228082000 | -1.344653000 | 0.572570000  |
| C | -3.622824000 | 0.400675000  | -1.059970000 |
| C | -4.604380000 | -1.537395000 | 0.695950000  |
| C | -5.000626000 | 0.204074000  | -0.939139000 |
| C | -5.496024000 | -0.765788000 | -0.060916000 |
| H | -2.543376000 | -1.941303000 | 1.180088000  |
| H | -3.237860000 | 1.160160000  | -1.745471000 |
| H | -4.986257000 | -2.290842000 | 1.389882000  |
| H | -5.690400000 | 0.811429000  | -1.531051000 |
| H | -6.573981000 | -0.918316000 | 0.037957000  |
| C | 2.025633000  | -1.976257000 | -0.119116000 |
| O | 2.007370000  | -3.084277000 | -0.603088000 |
| O | 2.885644000  | -1.576595000 | 0.825423000  |
| C | 3.960555000  | -2.468783000 | 1.137390000  |
| H | 3.579868000  | -3.439813000 | 1.489967000  |



|   |             |              |             |
|---|-------------|--------------|-------------|
| H | 4.592689000 | -2.629465000 | 0.250253000 |
| H | 4.543373000 | -1.982097000 | 1.929491000 |

**4ba, E = -1015.378313**

|   |              |              |              |
|---|--------------|--------------|--------------|
| N | -1.268351000 | -0.432082000 | 0.140358000  |
| C | -0.129717000 | -1.241923000 | 0.619677000  |
| C | 0.799833000  | -1.563093000 | -0.574881000 |
| H | 0.446858000  | -0.588142000 | 1.292481000  |
| C | -0.632295000 | -2.414720000 | 1.462066000  |
| C | -1.900851000 | -3.023850000 | 0.902803000  |
| O | -2.898633000 | -2.015445000 | 0.664663000  |
| C | -2.580648000 | -0.860192000 | 0.052983000  |
| O | -3.448482000 | -0.221822000 | -0.508748000 |
| H | -1.727643000 | -3.564149000 | -0.039511000 |
| H | -2.356533000 | -3.724856000 | 1.615397000  |
| H | 0.150928000  | -3.184101000 | 1.537908000  |
| H | -0.840131000 | -2.053603000 | 2.481742000  |
| H | 1.651093000  | -2.134262000 | -0.172826000 |
| C | 0.141669000  | -2.390154000 | -1.682417000 |
| H | -0.761772000 | -1.897765000 | -2.077903000 |
| H | 0.841028000  | -2.525906000 | -2.522419000 |
| H | -0.139760000 | -3.393117000 | -1.329684000 |
| C | 1.354484000  | -0.211292000 | -1.130563000 |
| H | 1.654332000  | -0.385260000 | -2.177900000 |
| C | 0.299624000  | 0.861279000  | -1.141809000 |
| H | 0.553535000  | 1.822353000  | -1.594289000 |
| C | -0.904226000 | 0.743733000  | -0.552306000 |
| C | 2.615875000  | 0.235364000  | -0.393010000 |
| C | 2.577121000  | 1.131064000  | 0.687302000  |
| C | 3.859351000  | -0.302480000 | -0.769577000 |
| C | 3.745749000  | 1.471636000  | 1.379604000  |
| C | 5.027247000  | 0.035803000  | -0.081646000 |
| C | 4.974582000  | 0.925676000  | 0.998432000  |
| H | 1.624285000  | 1.571214000  | 0.990696000  |
| H | 3.909095000  | -0.998681000 | -1.612279000 |
| H | 3.692809000  | 2.171327000  | 2.218301000  |
| H | 5.984212000  | -0.392426000 | -0.392551000 |
| H | 5.887949000  | 1.192846000  | 1.536642000  |
| C | -1.817793000 | 1.931032000  | -0.498665000 |
| O | -1.963769000 | 2.721967000  | -1.402769000 |
| O | -2.370158000 | 2.066599000  | 0.713732000  |
| C | -3.341164000 | 3.106035000  | 0.857069000  |
| H | -2.899417000 | 4.093921000  | 0.653321000  |
| H | -4.185376000 | 2.942586000  | 0.168915000  |
| H | -3.691756000 | 3.058706000  | 1.896048000  |
