# Supplementary material for: Intermolecular [3+3] ring expansion of aziridines to dehydropiperi-dines through the intermediacy of aziridinium ylides
Source: Nat Commun. 2020 Mar 9;11:1273. doi: 10.1038/s41467-020-15134-x (PMC7062875; doi:10.1038/s41467-020-15134-x)
Supplement: Supplementary file 1 — Supplementary Information [file 41467_2020_15134_MOESM1_ESM.pdf]

## **Supplementary Information**

### **Intermolecular [3+3] Ring-Expansion of Aziridines to Dehydropiperidines through the Intermediacy of Aziridinium Ylides**

Schomaker, J. M. et al.

## Supplementary Methods

Unless otherwise specified, all reactions were run under an inert atmosphere of N<sub>2</sub>. Glassware was either oven-dried overnight at 130 °C or flame-dried under a stream of dry nitrogen prior to use. Unless otherwise specified, reagents were used as obtained from the vendor without further purification. Procedures for compounds requiring purification were obtained from "Purification of Laboratory Chemicals".<sup>1</sup> Dichloromethane and acetonitrile were dried over CaH<sub>2</sub> and freshly distilled prior to use. All other solvents were also purified in accordance with methods reported in "Purification of Laboratory Chemicals".<sup>1</sup> Analytical thin layer chromatography (TLC) was performed utilizing pre-coated silica gel 60 F<sub>254</sub> plates containing a fluorescent indicator, while preparative chromatography was performed using SilicaFlash P60 silica gel (230-400 mesh) via Still's method.<sup>2</sup> The mobile phases for column chromatography varied depending on the substrate; however, hexanes/ether, hexanes/ethyl acetate, or toluene/ethyl acetate were commonly employed. Columns were typically run using a gradient method, beginning with 100% of the less polar eluent and gradually increasing the polarity with the other solvent. For reactions producing products without a UV signature, a potassium permanganate stain or CAM stain was employed to visualize the reaction products. <sup>1</sup>H NMR and <sup>13</sup>C NMR spectra were obtained using Bruker Avance-400, Bruker Avance-500 or Varian Inova-600 NMR spectrometers. For <sup>1</sup>H NMR, chemical shifts are reported relative to residual protiated solvent peaks ( $\delta$  7.26, 2.49, 7.15 and 4.80 ppm for CDCl<sub>3</sub>, (CD<sub>3</sub>)<sub>2</sub>SO, C<sub>6</sub>D<sub>6</sub> and CD<sub>3</sub>OD respectively). <sup>13</sup>C NMR spectra were measured at either 125 MHz or 150 MHz on the same instruments noted above for recording <sup>1</sup>H NMR spectra. Chemical shifts were again reported in accordance to residual protiated solvent peaks ( $\delta$  77.1, 39.5, 128.0 and 49.0 ppm for CDCl<sub>3</sub>, (CD<sub>3</sub>)<sub>2</sub>SO, C<sub>6</sub>D<sub>6</sub>, and CD<sub>3</sub>OD, respectively). Accurate mass measurements were acquired at the University of Wisconsin, Madison using a Micromass LCT (electrospray ionization, time-of-flight analyzer or electron impact methods). The NMR and Mass Spectrometry facilities are funded by the NSF (CHE-1048642), the NIH (S10 OD012245, 1S10 OD020022-1), the Bender Fund, UW2020, and the University of Wisconsin-Madison.

**Preparation of carbamate aziridine precursors.** All carbamates, if not explicitly mentioned in the subsequent section, were synthesized according to reported literature procedures.<sup>3</sup>

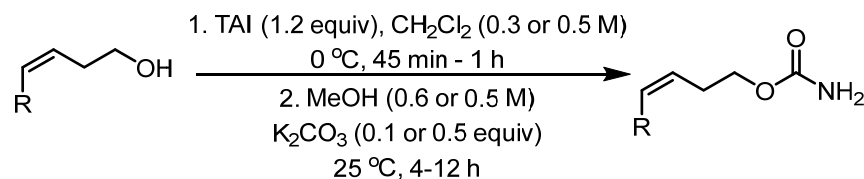

**General procedure for carbamate formation.** The homoallylic alcohol (1 equiv) was dissolved in  $\text{CH}_2\text{Cl}_2$  (0.5 or 0.3 M) and cooled to  $0\text{ }^\circ\text{C}$ . Trichloroacetylisocyanate (TAI) (1.2 equiv) was then added dropwise to the cooled solution. The reaction was stirred at  $0\text{ }^\circ\text{C}$  until TLC indicated complete consumption of the starting material (usually between 45 min to 1 h). The solvent was then removed under reduced pressure and the crude reaction mixture was dissolved in MeOH (0.6 or 0.5 M).  $\text{K}_2\text{CO}_3$  (0.1 or 0.5 equiv) was added in a single portion, and the mixture was stirred at room temperature until TLC indicated complete consumption of the starting material. Saturated aqueous  $\text{NH}_4\text{Cl}$  was added to quench the reaction and the mixture was extracted with three portions of  $\text{CH}_2\text{Cl}_2$ . The combined organic phases were washed with brine. The crude product was then diluted with  $\text{CH}_2\text{Cl}_2$  (0.05 M) and 1 M aqueous NaOH solution (10 mL/mmol) was added. The biphasic solution was vigorously stirred for 30 min to remove the trichloroacetamide impurity. *Note 1: it is imperative that this step is done carefully. If not, it is likely that the aziridination will not proceed to completion.* The mixture was extracted with three portions of  $\text{CH}_2\text{Cl}_2$ . The combined organic phases were washed with brine, dried over  $\text{Na}_2\text{SO}_4$  or  $\text{Mg}_2\text{SO}_4$  and concentrated under reduced pressure. The crude product was purified by silica gel column chromatography (40% EtOAc/ Hexanes).

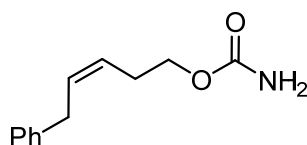

**Carbamate precursor to Compound 2a.** Following the general procedure, 0.5 M CH<sub>2</sub>Cl<sub>2</sub>, 0.6 M of MeOH, and 0.1 equiv of K<sub>2</sub>CO<sub>3</sub> were used. The reaction to furnish the carbamate precursor to **2a** was conducted on 10 mmol scale. The product was purified by silica gel flash column chromatography (20% to 50% EtOAc/Hex) to yield **2a** as a white solid (1.81g, 88% yield). <sup>1</sup>H NMR (500 MHz, CDCl<sub>3</sub>) δ 7.31 – 7.27 (m, 2H), 7.22 – 7.17 (m, 3H), 5.72 (dtt, *J* = 10.8, 7.5, 1.6 Hz, 1H), 5.52 (dtt, *J* = 10.7, 7.3, 1.7 Hz, 1H), 4.55 (br s, 2H), 4.12 (t, *J* = 6.7 Hz, 2H), 3.43 (dd, *J* = 7.5, 1.5 Hz, 2H), 2.50 (qd, *J* = 6.8, 1.6 Hz, 2H). <sup>13</sup>C NMR (126 MHz, CDCl<sub>3</sub>) δ 156.9, 140.8, 131.1, 128.6, 128.5, 126.1, 125.8, 64.6, 33.6, 27.3. HRMS (ESI) *m/z* calculated for C<sub>12</sub>H<sub>15</sub>NO<sub>2</sub> [M+H]<sup>+</sup> 206.1176; found, 206.1173.

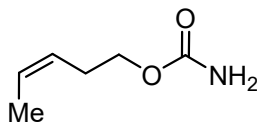

**Carbamate precursor to Compound 2b.** Following the general procedure, the reaction to furnish carbamate precursor to **2b** was conducted on 1.2 mmol scale using 0.5 M CH<sub>2</sub>Cl<sub>2</sub>, 0.6 M of MeOH, and 0.1 equiv. of K<sub>2</sub>CO<sub>3</sub>. The product was purified by silica gel flash column chromatography (10% to 50% Et<sub>2</sub>O/Pentane) to yield **2b** as a white solid (154.0 mg, 92% yield). The minor NMR impurity is the isomerized *trans* product, which can be carried on, as it is unreactive in the carbene transfer reaction. <sup>1</sup>H NMR (500 MHz, CDCl<sub>3</sub>) δ 5.58 (dddd, *J* = 13.6, 6.8, 4.9, 3.4 Hz, 1H), 5.38 (dtq, *J* = 10.8, 7.3, 1.9 Hz, 1H), 4.58 (br s, 2H), 4.07 (t, *J* = 6.9 Hz, 2H), 2.39 (q, *J* = 7.0 Hz, 2H), 1.64 (dd, *J* = 6.8, 1.7 Hz, 3H). <sup>13</sup>C NMR (126 MHz, CDCl<sub>3</sub>) δ 156.9, 126.8, 125.3, 64.6, 26.8, 12.9. HRMS (ESI) *m/z* calculated for C<sub>6</sub>H<sub>11</sub>NO<sub>2</sub> [M+ Na]<sup>+</sup> 152.0862; found, 152.0863.

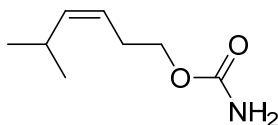

**Carbamate precursor to Compound 2e.** Following the general procedure, 0.3 M CH<sub>2</sub>Cl<sub>2</sub>, 0.5 M of MeOH, and 0.5 equiv of K<sub>2</sub>CO<sub>3</sub> were used on a 6.02-mmol scale. The product was purified by silica gel flash column chromatography (40% ethyl acetate/hexanes) to yield **2e** as a white solid (0.69 g, 73% yield). <sup>1</sup>H NMR (500 MHz, CDCl<sub>3</sub>) δ 5.34 (ddt, *J* = 11.0, 9.4, 1.5 Hz, 1H), 5.23 (dt, *J* = 10.7, 7.2 Hz, 1H), 4.53 (br s, 2H), 4.06 (t, *J* = 6.9 Hz, 2H), 2.60 (dp, *J* = 9.4, 6.6 Hz, 1H), 2.39 (qd, *J* = 7.0, 1.5 Hz, 2H), 0.96 (d, *J* = 6.6 Hz, 6H). <sup>13</sup>C NMR (126 MHz, CDCl<sub>3</sub>) δ 156.9, 140.4, 121.9, 64.8, 27.2, 26.6, 23.1. HRMS (ESI) *m/z* calculated for C<sub>8</sub>H<sub>15</sub>NO<sub>2</sub> [M+H]<sup>+</sup> 158.1176; found, 158.1175.

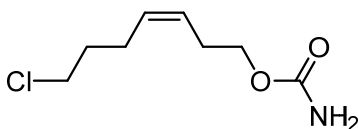

**Carbamate precursor to Compound 2f.** Following the general procedure, 0.5 M CH<sub>2</sub>Cl<sub>2</sub>, 0.6 M of MeOH, and 0.1 equiv of K<sub>2</sub>CO<sub>3</sub> were used on a 4.6 mmol scale. The product was purified by silica gel flash column chromatography (30% EtOAc/Hex) to yield **2f** as a white solid (830.0 mg, 95% yield) <sup>1</sup>H NMR (500 MHz, CDCl<sub>3</sub>) δ 5.54 – 5.27 (m, 2H), 4.60 (br s, 2H), 4.08 (t, *J* = 6.8 Hz, 2H), 3.54 (t, *J* = 6.5 Hz, 2H), 2.51 – 2.33 (m, 2H), 2.33 – 2.17 (m, 2H), 1.93 – 1.74 (m, 2H). <sup>13</sup>C NMR (126 MHz, CDCl<sub>3</sub>) δ 156.7, 130.5, 126.3, 64.5, 44.4, 32.2, 27.1, 24.4. HRMS (ESI) *m/z* calculated for C<sub>8</sub>H<sub>14</sub>NO<sub>2</sub> [M+H]<sup>+</sup> 192.0786; found, 192.0784.

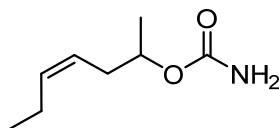

**Carbamate precursor to Compound 2h.** Following the general procedure, 0.5 M CH<sub>2</sub>Cl<sub>2</sub>, 0.6 M of MeOH, and 0.1 equiv of K<sub>2</sub>CO<sub>3</sub> were used on a 12.2 mmol scale. The product was purified by silica gel flash column chromatography (20% to 50% EtOAc/Hex) to yield **2h** as a yellow low-melting solid (1.17g, 61% yield). <sup>1</sup>H NMR (500 MHz, CDCl<sub>3</sub>) δ 5.63 – 5.40 (m, 1H), 5.40 – 5.11 (m, 1H), 4.81 (h, *J* = 6.3 Hz, 1H), 4.60 (br s, 2H), 2.41 – 2.30 (m, 1H), 2.30 – 2.21 (m, 1H), 2.11 – 2.00 (m, 2H), 1.22 (d, *J* = 6.3

Hz, 3H), 0.96 (t,  $J = 7.5$  Hz, 3H).  $\delta$   $^{13}\text{C}$  NMR (126 MHz,  $\text{CDCl}_3$ )  $\delta$  156.7, 134.6, 123.7, 71.6, 33.8, 20.8, 19.8, 14.3. HRMS (ESI)  $m/z$  calculated for  $\text{C}_8\text{H}_{15}\text{NO}_2$   $[\text{M}+\text{Na}]^+$  180.0995; found, 180.0994.

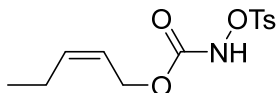

**Carbamate precursor to Compound 2i.** The *N*-tosyl carbamate was synthesized following Lebel's reported preparation.<sup>4,5</sup>  $^1\text{H}$  NMR (500 MHz,  $\text{CDCl}_3$ )  $\delta$  7.89 – 7.86 (m, 2H), 7.77 (br s, 1H), 7.36 (d,  $J = 8.1$  Hz, 2H), 5.62 (dt,  $J = 10.3, 7.5, 1.4$  Hz, 1H), 5.29 (dt,  $J = 10.4, 7.0, 1.6$  Hz, 1H), 4.56 (dd,  $J = 7.0, 1.2$  Hz, 2H), 2.46 (s, 3H), 2.04 (pd,  $J = 7.6, 1.6$  Hz, 2H), 0.96 (t,  $J = 7.5$  Hz, 3H).  $^{13}\text{C}$  NMR (126 MHz,  $\text{CDCl}_3$ )  $\delta$  155.5, 146.2, 138.2, 130.5, 129.9, 129.7, 121.5, 62.8, 21.9, 21.0, 14.1.  $\delta$  HRMS (ESI)  $m/z$  calculated for  $\text{C}_{13}\text{H}_{21}\text{N}_2\text{O}_5\text{S}$   $[\text{M}+\text{NH}_4]^+$  317.1166; found, 317.1166.

**Preparation of aziridine precursors.** All aziridines, if not explicitly mentioned in the subsequent section, were synthesized according to reported literature procedures.<sup>3</sup>

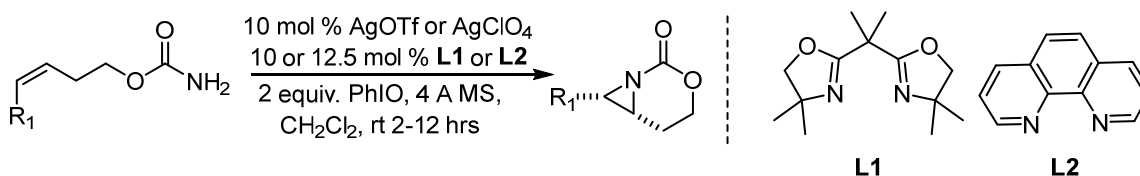

**General procedure for silver-catalyzed aziridination of homoallylic carbamates.** A cooled, flame-dried roundbottom flask was charged with  $\text{AgClO}_4$  or  $\text{AgOTf}$  (0.1 equiv) and dimethyl bisoxazoline **L1** or 1,10-phenanthroline ligand **L2** (0.1 equiv). Dry  $\text{CH}_2\text{Cl}_2$  (0.05 or 0.1 M) was added to the round-bottom and the mixture was stirred vigorously for 15 minutes. *Note: Both **L1** and **L2** will furnish the aziridine product. **L2** may result in varying ratios of aziridine to C-H insertion product if the metal/ligand ratio is not carefully measured to be 1:1.<sup>3</sup> **L1** is the preferable ligand, as the ratio of metal/ligand is not as important to the aziridine/C-H insertion product ratio. However, **L2** is a good*

commercially available alternative if **L1** is unavailable. After 15 minutes of pre-stirring, powdered 4Å molecular sieves (1g of sieves /mmol of substrate) were added. *Note: It is not necessary to use rigorously dried molecular sieves.* After 5 minutes, the carbamate ester (1 equiv) and iodosobenzene (2 equiv) were added. *Note: it is not essential to wait for 5 minutes, provided the 4Å molecular sieves, carbamate ester, and iodosobenzene are added sequentially in this order.* The reaction was then capped, covered in aluminum foil (if AgOTf is used), and allowed to stir at room temperature for 2-12 h. After TLC indicated complete consumption of the starting material, the reaction mixture was filtered over celite and concentrated. The crude mixture was then purified by column chromatography – once with a gradient elution of 0-2.5% MeOH/CH<sub>2</sub>Cl<sub>2</sub>, followed by a second column with a gradient elution of 0-50% EtOAc/hexanes or 5% EtOAc/CH<sub>2</sub>Cl<sub>2</sub>. *Note: omitting the first plug with CH<sub>2</sub>Cl<sub>2</sub> leaves silver byproducts in the mixture, which, upon concentration, can degrade the aziridine over time or cause decreased reactivity in the subsequent carbene transfer reaction.* The compounds were stored at -20 or -78 °C to prevent decomposition. All aziridines not described below were prepared according to published literature procedures.

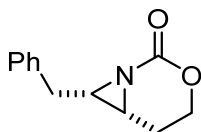

**Compound 2a.** Following the general procedure, the aziridination reaction to furnish **2a** was conducted on 0.48 mmol scale. The product was purified by silica gel flash column chromatography (0-2.5% MeOH/CH<sub>2</sub>Cl<sub>2</sub>, then 0 to 5% EtOAc/CH<sub>2</sub>Cl<sub>2</sub>) to yield **2a** as a white solid (84.9 mg, 86%). <sup>1</sup>H NMR (500 MHz, CDCl<sub>3</sub>) δ 7.34 (tt, *J* = 8.1, 1.5 Hz, 2H), 7.30 – 7.27 (m, 1H), 7.25 – 7.22 (m, 2H), 4.50 – 4.39 (m, 2H), 3.34 (dd, *J* = 15.4, 3.9 Hz, 1H), 2.98 (ddd, *J* = 8.9, 6.8, 4.8 Hz, 1H), 2.90 (ddd, *J* = 10.1, 4.8, 3.9 Hz, 1H), 2.41 (dd, *J* = 15.3, 10.1 Hz, 1H), 2.29 (ddt, *J* = 14.6, 6.8, 1.9 Hz, 1H), 1.69 (dddd, *J* = 14.4, 12.1, 8.9, 4.7 Hz, 1H). <sup>13</sup>C NMR (126 MHz, CDCl<sub>3</sub>) δ 158.6, 136.7, 129.0, 128.5, 127.2, 68.1, 42.8, 37.8, 31.1, 19.7. HRMS (ESI) *m/z* calculated for C<sub>12</sub>H<sub>13</sub>NO<sub>2</sub>[M+H]<sup>+</sup> 204.1019; found, 204.1020.

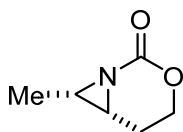

**Compound 2b.** Following the general procedure, the aziridination reaction to furnish **2b** was conducted on a 0.97 mmol scale. The product was purified by silica gel flash column chromatography (0-2.5% MeOH/CH<sub>2</sub>Cl<sub>2</sub>, then 0% to 50% EtOAc/Hexanes) to yield **2b** as a clear oil (65.2 mg, 53%). <sup>1</sup>H NMR (500 MHz, CDCl<sub>3</sub>) δ 4.39 (ddd, *J* = 12.4, 10.4, 2.2 Hz, 1H), 4.34 (ddd, *J* = 10.5, 4.6, 1.7 Hz, 1H), 2.89 (ddd, *J* = 8.9, 7.0, 4.9 Hz, 1H), 2.81 – 2.72 (m, 1H), 2.18 (ddt, *J* = 14.7, 6.9, 2.0 Hz, 1H), 1.55 – 1.44 (m, 1H), 1.29 (d, *J* = 6.0 Hz, 3H). <sup>13</sup>C NMR (126 MHz, CDCl<sub>3</sub>) δ 158.5, 67.7, 38.3, 37.6, 18.9, 10.2 HRMS (ESI) *m/z* calculated for C<sub>6</sub>H<sub>9</sub>NO<sub>2</sub>[M+H]<sup>+</sup> 128.0706; found, 128.0704.

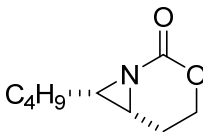

**Compound 2d.** Following the general procedure, the aziridination reaction to furnish **2d** was conducted on a 1.75 mmol scale. The product was purified by silica gel flash column chromatography (2.5% MeOH/CH<sub>2</sub>Cl<sub>2</sub> and 5% EtOAc/CH<sub>2</sub>Cl<sub>2</sub>). <sup>1</sup>H NMR (500 MHz, CDCl<sub>3</sub>) δ 4.48 – 4.29 (m, 2H), 2.87 (ddd, *J* = 8.9, 6.9, 4.9 Hz, 1H), 2.63 (dt, *J* = 9.4, 4.9 Hz, 1H), 2.18 (ddt, *J* = 14.6, 6.9, 2.0 Hz, 1H), 1.88 (ddt, *J* = 14.2, 9.6, 5.2 Hz, 1H), 1.63 – 1.32 (m, 5H), 1.16 (dtd, *J* = 14.6, 9.2, 5.2 Hz, 1H), 0.92 (t, *J* = 7.0 Hz, 3H). <sup>13</sup>C NMR (126 MHz, CDCl<sub>3</sub>) δ 158.8, 68.0, 42.9, 37.5, 28.8, 25.2, 22.6, 19.3, 14.1. HRMS (ESI) *m/z* calculated for C<sub>9</sub>H<sub>16</sub>NO<sub>2</sub> [M+H]<sup>+</sup> 170.1176; found, 170.1174.

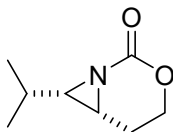

**Compound 2e.** Following the general procedure, the aziridination reaction to furnish **2e** was conducted on a 3.18 mmol scale. The product was purified by silica gel flash column chromatography (2.5% MeOH/CH<sub>2</sub>Cl<sub>2</sub> and 5% EtOAc/CH<sub>2</sub>Cl<sub>2</sub>). <sup>1</sup>H NMR (500 MHz, CDCl<sub>3</sub>) δ 4.45 – 4.22 (m, 2H), 2.81 (ddd, *J* = 9.1, 6.8, 5.0 Hz, 1H), 2.38 (dd, *J* = 9.9, 5.0 Hz, 1H), 2.19 (ddt, *J* = 14.6, 6.8, 2.0 Hz, 1H), 1.62 – 1.35 (m, 2H), 1.30 (d, *J* = 6.4 Hz, 3H), 1.01 (d, *J* = 6.7 Hz, 3H). <sup>13</sup>C NMR (126 MHz, CDCl<sub>3</sub>) δ 158.5, 67.7, 49.4, 36.9, 26.9, 20.1, 20.0, 19.6. HRMS-(ESI) *m/z* calculated for C<sub>8</sub>H<sub>14</sub>NO<sub>4</sub> [M+Na]<sup>+</sup> 156.1019; found, 156.1019.

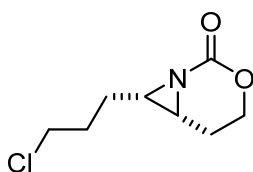

**Compound 2f.** Following the general procedure, the aziridination reaction to furnish **2f** was conducted on 0.42 mmol scale. The product was purified by silica gel flash column chromatography (2.5% MeOH/CH<sub>2</sub>Cl<sub>2</sub> and then 0 to 50% EtOAc/Hexanes) to yield **2f** as a colorless oil (49.7 mg, 62%). <sup>1</sup>H NMR (500 MHz, CDCl<sub>3</sub>) δ 4.46 – 4.33 (m, 2H), 3.63 (ddd, *J* = 11.0, 6.8, 5.2 Hz, 1H), 3.55 (ddd, *J* = 11.0, 7.6, 5.2 Hz, 1H), 2.90 (ddd, *J* = 9.0, 6.9, 4.9 Hz, 1H), 2.65 (ddd, *J* = 7.5, 6.0, 4.9 Hz, 1H), 2.30 – 2.11 (m, 2H), 1.97 – 1.87 (m, 1H), 1.83 (dddd, *J* = 14.5, 9.6, 5.9, 4.8 Hz, 1H), 1.65 – 1.47 (m, 2H). <sup>13</sup>C NMR (126 MHz, CDCl<sub>3</sub>) δ 158.6, 68.0, 44.3, 42.0, 37.4, 29.6, 23.2, 19.3. HRMS (ESI) *m/z* calculated for C<sub>8</sub>H<sub>12</sub>ClNO<sub>2</sub>[M+H]<sup>+</sup> 190.0629; found, 190.0630.

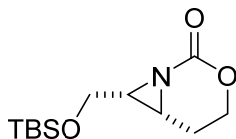

**Compound 2g.** Following the general procedure, the aziridination reaction to furnish **2g** was conducted on 1.09 mmol scale. The product was purified by silica gel flash column chromatography (2.5% MeOH/CH<sub>2</sub>Cl<sub>2</sub> and 5% ethyl acetate/CH<sub>2</sub>Cl<sub>2</sub>). <sup>1</sup>H NMR (500 MHz, CDCl<sub>3</sub>) δ 4.40 – 4.24 (m, 2H), 4.13 (dd, *J* = 11.8, 3.6 Hz, 1H), 3.39 (dd, *J* = 11.8,

8.4 Hz, 1H), 2.83 (ddd,  $J = 9.0, 7.0, 4.8$  Hz, 1H), 2.70 (ddd,  $J = 8.4, 4.8, 3.5$  Hz, 1H), 2.13 (ddt,  $J = 14.7, 6.9, 2.0$  Hz, 1H), 1.68 (dddd,  $J = 14.7, 12.2, 8.9, 4.7$  Hz, 1H), 0.82 (s, 9H), 0.01 (s, 6H).  $^{13}\text{C}$  NMR (126 MHz,  $\text{CDCl}_3$ )  $\delta$  158.3, 68.1, 58.5, 41.7, 37.4, 25.8, 19.0, -5.4. HRMS-(ESI)  $m/z$  calculated for  $\text{C}_{12}\text{H}_{24}\text{NO}_3\text{Si}$   $[\text{M}+\text{H}]^+$  258.1520; found, 258.1518.

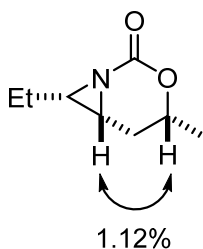

**Compound 2h.** Following the general procedure, the aziridination reaction to furnish **2h** was conducted on 2.7 mmol scale. The product was purified by silica gel flash column chromatography (2.5% MeOH/ $\text{CH}_2\text{Cl}_2$  and then 0 to 20% EtOAc/ $\text{CH}_2\text{Cl}_2$ ) to yield **2h** as a colorless oil (174.1 mg, 38%). The minor diastereomer was separated *via* automated flash chromatography using the EtOAc/ $\text{CH}_2\text{Cl}_2$  solvent system.  $^1\text{H}$  NMR (500 MHz,  $\text{CDCl}_3$ )  $\delta$  4.57 (dq,  $J = 11.1, 6.3, 2.1$  Hz, 1H), 2.82 (ddd,  $J = 9.0, 6.9, 4.9$  Hz, 1H), 2.61 (dt,  $J = 8.3, 5.1$  Hz, 1H), 2.18 (ddd,  $J = 14.4, 6.9, 2.1$  Hz, 1H), 1.86 (ddd,  $J = 14.4, 7.3, 5.4$  Hz, 1H), 1.37 (d,  $J = 6.2$  Hz, 3H), 1.30 – 1.12 (m, 2H), 1.10 (t,  $J = 7.4$  Hz, 3H).  $^{13}\text{C}$  NMR (126 MHz,  $\text{CDCl}_3$ )  $\delta$  159.2, 75.8, 44.8, 37.1, 26.2, 20.7, 19.1, 10.9. HRMS-(ESI)  $m/z$  calculated for  $\text{C}_8\text{H}_{13}\text{NO}_2$   $[\text{M}+\text{H}]^+$  156.1019; found, 156.1015.

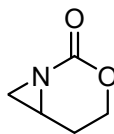

**Compound 2i.** Following the general procedure, the aziridination reaction to furnish **2i** was conducted on 1.74 mmol scale. The product was purified by silica gel flash column chromatography (0-2.5% MeOH/ $\text{CH}_2\text{Cl}_2$  and then 0 to 70% EtOAc/Hexanes) to yield **2i** as a colorless oil (53.8 mg, 27% yield). The minor diastereomer was separated *via*

automated flash chromatography using the EtOAc/CH<sub>2</sub>Cl<sub>2</sub> solvent system. <sup>1</sup>H NMR (500 MHz, CDCl<sub>3</sub>) δ 4.45 (ddd, *J* = 12.5, 10.6, 2.0 Hz, 1H), 4.33 (ddd, *J* = 10.6, 4.1, 1.9 Hz, 1H), 2.81 (ddt, *J* = 8.4, 6.1, 4.0 Hz, 1H), 2.55 (d, *J* = 4.4 Hz, 1H), 2.42 (dd, *J* = 14.7, 6.1 Hz, 1H), 2.07 (d, *J* = 3.6 Hz, 1H), 1.36 (dddd, *J* = 14.6, 12.6, 8.7, 4.1 Hz, 1H). <sup>13</sup>C NMR (126 MHz, CDCl<sub>3</sub>) δ 160.91, 68.10, 35.24, 33.91, 25.51. HRMS-(ESI) *m/z* calculated for C<sub>5</sub>H<sub>7</sub>NO<sub>2</sub>[M+H]<sup>+</sup> 114.0550; found, 114.0548.

**Preparation of diazoesters.** All diazoester compounds, if not directly mentioned in the subsequent section, were synthesized according to the reported literature procedures and characterized as described therein.<sup>6,7</sup>

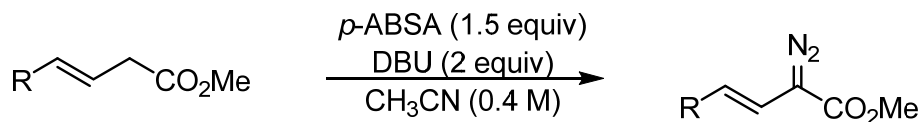

A flame-dried, round bottom flask was placed under N<sub>2</sub> and charged with ester (1 equiv, brought to 0.2 M in CH<sub>3</sub>CN). *p*-ABSA (4-acetamidobenzenesulfonyl azide 1.2-10 equiv) was then added in a single portion and the mixture cooled to 0 °C. After 5 minutes of cooling, freshly distilled DBU (2.0-2.2 equiv) was added dropwise to the mixture. This reaction was allowed to warm up to room temperature and stir until the TLC indicated completion. Once complete, the CH<sub>3</sub>CN was removed under reduced pressure at room temperature. *Note: diazoesters are heat-sensitive, and can become explosive if they are heated too high.* The concentrated mixture was then taken back up in ether and transferred to a separatory funnel. The organics were then washed twice with saturated aqueous NH<sub>4</sub>Cl, dried with MgSO<sub>4</sub> and concentrated *in vacuo*. The residue was subjected to silica gel flash column chromatography (generally, 2% Et<sub>2</sub>O/pentane to 10% Et<sub>2</sub>O/pentane).

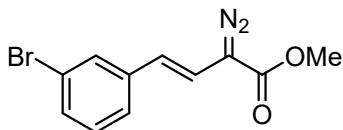

**Compound 3c.** Following a procedure published by Davies and coworkers<sup>8</sup> from the corresponding aldehyde, the reaction to furnish diazoester **3c** was conducted on 10 mmol scale. The product was purified by silica gel flash column chromatography (2% Et<sub>2</sub>O/Pentane to 10% Et<sub>2</sub>O/Pentane) to yield **3c** as an orange solid (950.0 mg, 34% yield). <sup>1</sup>H NMR (500 MHz, CDCl<sub>3</sub>) δ 7.50 (t, *J* = 1.9 Hz, 1H), 7.32 (ddd, *J* = 7.8, 1.9, 1.0 Hz, 1H), 7.27 (s, 1H), 7.18 (t, *J* = 7.8 Hz, 1H), 6.50 (d, *J* = 16.3 Hz, 1H), 6.13 (d, *J* = 16.3 Hz, 1H), 3.86 (s, 3H). <sup>13</sup>C NMR (126 MHz, CDCl<sub>3</sub>) δ 165.4, 139.1, 130.3, 130.0, 128.8, 124.6, 123.1, 121.5, 113.4, 52.6, C<sub>11</sub>H<sub>9</sub>BrN<sub>2</sub>O<sub>2</sub>[M+H]<sup>+</sup> 280.9920; found, 280.9919.

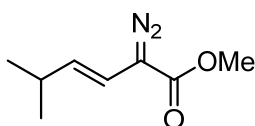

**Compound 3g.** Following the procedure described above, the reaction to furnish diazoester **3g** was conducted on 8.44 mmol scale. The product was purified by silica gel flash column chromatography (2% Et<sub>2</sub>O/Pentane to 10% Et<sub>2</sub>O/Pentane) to yield **3g** as a red oil (980.6 mg, 69% yield). <sup>1</sup>H NMR (500 MHz, CDCl<sub>3</sub>) δ 5.69 (dd, *J* = 15.9, 1.4 Hz, 1H), 5.29 (dd, *J* = 15.9, 6.7 Hz, 1H), 3.80 (s, 3H), 2.44 (hd, *J* = 6.7, 1.4 Hz, 1H), 1.03 (d, *J* = 6.8 Hz, 6H). <sup>13</sup>C NMR (126 MHz, CDCl<sub>3</sub>) δ 166.1, 132.6, 109.2, 52.1, 31.40, 22.5. C<sub>8</sub>H<sub>12</sub>N<sub>2</sub>O<sub>2</sub> [M+H]<sup>+</sup> 169.0972; found, 169.0969.

### General procedure for piperidine synthesis.

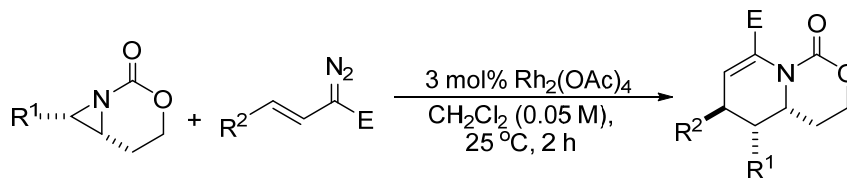

A flame-dried round bottom flask was placed under nitrogen and charged with Rh<sub>2</sub>OAc<sub>4</sub> (0.03 equiv), followed by a solution of the aziridine (0.1 mM in dry CH<sub>2</sub>Cl<sub>2</sub>). *Note: Upon the addition of aziridine, a color change of green to purple will be observed. This does not signify catalyst death; rather, experiments show that if this color change is not observed, the reaction is less likely to proceed.* To this mixture was added a solution

of the diazoester compound (1.2 equiv, brought to 0.1 mM in CH<sub>2</sub>Cl<sub>2</sub>) dropwise over 2 h using a syringe pump. The conversion was checked by TLC and NMR after the addition was complete; once all the starting material had been consumed, the reaction was concentrated and loaded directly onto silica for column chromatography (0% to 50% EtOAc/Hexanes). *Note: The  $R_f$  differences between the aziridine and the piperidine product can be very small.*

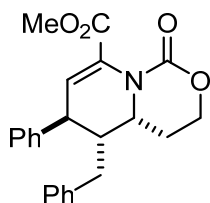

**Compound 4aa.** Following the general procedure, the carbene transfer to furnish **4aa** was conducted on 0.1 mmol scale. The product was purified by silica gel flash column chromatography (0 to 50% EtOAc/hexanes, 10% increments) to yield **4aa** as a white solid (30.8 mg, 76% yield, >19:1 *dr*). <sup>1</sup>H NMR (500 MHz, CDCl<sub>3</sub>)  $\delta$  7.38 (t,  $J$  = 7.5 Hz, 2H), 7.32 – 7.27 (m, 1H), 7.26 – 7.23 (m, 4H), 7.23 – 7.18 (m, 1H), 6.87 (dd,  $J$  = 7.0, 1.9 Hz, 2H), 6.12 (dd,  $J$  = 4.6, 1.4 Hz, 1H), 4.45 – 4.25 (m, 2H), 3.87 (s, 3H), 3.87 – 3.81 (m, 1H), 3.50 (d,  $J$  = 4.6 Hz, 1H), 2.98 (dd,  $J$  = 13.7, 3.0 Hz, 1H), 2.34 – 2.20 (m, 2H), 2.13 (ddq,  $J$  = 11.4, 2.8, 1.4 Hz, 1H), 2.02 (ddt,  $J$  = 14.2, 8.0, 2.0 Hz, 1H). <sup>13</sup>C NMR (126 MHz, CDCl<sub>3</sub>)  $\delta$  164.1, 152.6, 143.1, 139.0, 133.3, 129.3, 128.8, 128.6, 128.1, 126.9, 126.6, 120.0, 64.6, 52.6, 51.6, 46.7, 41.0, 32.6, 25.5. HRMS (ESI)  $m/z$  calculated for C<sub>23</sub>H<sub>23</sub>NO<sub>4</sub> [M+H]<sup>+</sup> 378.1700; found, 378.1696.

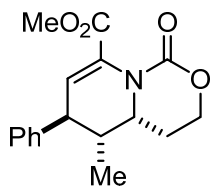

**Compound 4ba.** Following the general procedure, the carbene transfer to furnish **4ba** was conducted on 0.196 mmol scale. The product was purified by silica gel flash column

chromatography (0 to 50% EtOAc/Hexanes, 10% increments) to yield **4ba** as a white solid (38.4 mg, 65% yield, >19:1 *dr*). <sup>1</sup>H NMR (500 MHz, CDCl<sub>3</sub>) δ 7.35 (dd, *J* = 8.3, 6.9 Hz, 2H), 7.29 – 7.27 (m, 1H), 7.24 – 7.13 (m, 2H), 6.11 (dd, *J* = 4.6, 1.5 Hz, 1H), 4.35 – 4.23 (m, 2H), 3.85 (s, 3H), 3.70 (ddd, *J* = 10.4, 7.9, 1.8 Hz, 1H), 3.44 (d, *J* = 4.6 Hz, 1H), 2.08 – 1.93 (m, 2H), 1.88 (ddt, *J* = 14.3, 7.8, 2.1 Hz, 1H), 1.07 (d, *J* = 6.9 Hz, 3H). <sup>13</sup>C NMR (126 MHz, CDCl<sub>3</sub>) δ 164.5, 152.9, 143.5, 133.0, 128.9, 128.4, 127.2, 120.1, 64.7, 52.7, 51.9, 46.1, 39.1, 25.9, 13.9. HRMS (ESI) *m/z* calculated for C<sub>17</sub>H<sub>19</sub>NO<sub>4</sub> [2M+NH<sub>4</sub>]<sup>+</sup>; 620.2966 found, 620.2973.

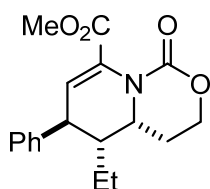

**Compound 4ca.** Following the general procedure, the carbene transfer to furnish **4ca** was conducted on 1.00 mmol scale. The product was purified by silica gel flash column chromatography (0 to 50% EtOAc/hexanes, 10% increments) to yield **4ca** as a white solid (237.9 mg, 75% yield, >19:1 *dr*). <sup>1</sup>H NMR (500 MHz, CDCl<sub>3</sub>) δ 7.35 (t, *J* = 7.6 Hz, 2H), 7.27 (d, *J* = 8.3 Hz, 1H), 7.20 – 7.14 (m, 2H), 6.12 (dd, *J* = 4.6, 1.4 Hz, 1H), 4.33 – 4.24 (m, 2H), 3.84 (s, 3H), 3.72 (ddd, *J* = 10.1, 8.1, 1.7 Hz, 1H), 3.66 (d, *J* = 4.6 Hz, 1H), 2.12 – 2.01 (m, 1H), 1.90 (ddt, *J* = 14.3, 8.1, 2.0 Hz, 1H), 1.65 – 1.54 (m, 3H), 1.16 – 1.13 (m, 3H). <sup>13</sup>C NMR (126 MHz, CDCl<sub>3</sub>) δ 164.2, 152.7, 143.3, 133.3, 128.7, 128.3, 126.9, 120.3, 64.6, 52.5, 51.7, 47.0, 41.8, 25.5, 19.0, 12.2. HRMS (ESI) *m/z* calculated for C<sub>18</sub>H<sub>21</sub>NO<sub>4</sub>[M+H]<sup>+</sup> 316.1543; found, 316.1541.

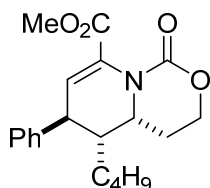

**Compound 4da.** Following the general procedure, the carbene transfer to furnish **4da** was conducted on 0.29 mmol scale. The product was purified by silica gel flash column

chromatography (0 to 40% EtOAc/Hexanes, 10% increments) to yield **4da** as a white solid (275.2 mg, 92% yield, >19:1 *dr*).  $^1\text{H}$  NMR (500 MHz,  $\text{CDCl}_3$ )  $\delta$  7.35 (t,  $J = 7.5$  Hz, 3H), 7.20 – 7.13 (m, 2H), 6.11 (dd,  $J = 4.6, 1.5$  Hz, 1H), 4.33 – 4.25 (m, 2H), 3.84 (s, 3H), 3.76 – 3.67 (m, 1H), 3.63 (d,  $J = 4.6$  Hz, 1H), 2.05 (dt,  $J = 14.2, 5.0$  Hz, 1H), 1.89 (ddt,  $J = 14.3, 8.0, 2.0$  Hz, 1H), 1.75 – 1.60 (m, 2H), 1.53 – 1.33 (m, 3H), 1.15 (dddd,  $J = 13.7, 10.4, 8.9, 4.6$  Hz, 1H), 0.95 (t,  $J = 6.9$  Hz, 3H).  $^{13}\text{C}$  NMR (126 MHz,  $\text{CDCl}_3$ )  $\delta$  164.3, 152.7, 143.4, 133.3, 128.7, 128.3, 127.0, 120.4, 64.6, 52.5, 51.7, 45.1, 42.6, 30.1, 25.9, 25.5, 22.8, 14.1. HRMS (ESI)  $m/z$  calculated for  $\text{C}_{20}\text{H}_{26}\text{NO}_4$   $[\text{M}+\text{H}]^+$  344.1856; found, 344.1853.

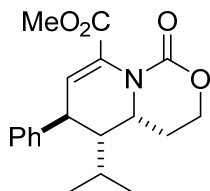

**Compound 4ea.** Following the general procedure, the carbene transfer to furnish **4ea** was conducted on 0.32 mmol scale. The product was purified by silica gel flash column chromatography (0 to 40% EtOAc/Hexanes, 10% increments) to yield **4ea** as a white solid (74.2 mg, 70% yield, >19:1 *dr*).  $^1\text{H}$  NMR (500 MHz,  $\text{CDCl}_3$ )  $\delta$  7.34 (dd,  $J = 8.2, 7.0$  Hz, 2H), 7.25 (d,  $J = 7.4$  Hz, 1H), 7.21 – 7.16 (m, 2H), 6.13 (dd,  $J = 4.3, 1.2$  Hz, 1H), 4.37 – 4.29 (m, 2H), 3.83 (m, 4H), 3.63 (d,  $J = 4.4$  Hz, 1H), 2.27 (ddt,  $J = 14.2, 11.3, 8.4$  Hz, 1H), 2.15 (m, 1H), 1.86 (ddt,  $J = 14.3, 7.4, 2.0$  Hz, 1H), 1.72 (hept,  $J = 2.5, 1.1$  Hz, 1H), 1.18 (d,  $J = 6.8$  Hz, 3H), 0.91 (d,  $J = 6.9$  Hz, 3H).  $^{13}\text{C}$  NMR (126 MHz,  $\text{CDCl}_3$ )  $\delta$  164.3, 151.9, 144.6, 133.4, 128.8, 128.0, 126.8, 121.8, 64.8, 52.5, 52.2, 49.5, 37.9, 25.7, 25.1, 24.1, 17.4.

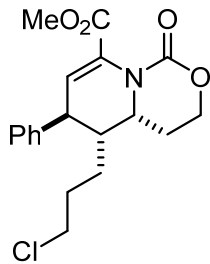

**Compound 4fa.** Following the general procedure, the carbene transfer to furnish **4fa** was conducted on 0.1 mmol scale. The product was purified by silica gel flash chromatography (0 to 50% EtOAc/Hexanes, 10% increments) to yield compound **4fa** as a white solid (25.1 mg, 69% yield, >19:1 *dr*). <sup>1</sup>H NMR (500 MHz, CDCl<sub>3</sub>) δ 7.36 (t, *J* = 7.6 Hz, 2H), 7.30 – 7.27 (m, 1H), 7.17 – 7.14 (m, 2H), 6.11 (dd, *J* = 4.7, 1.5 Hz, 1H), 4.35 – 4.26 (m, 2H), 3.85 (s, 3H), 3.75 (ddd, *J* = 10.3, 8.2, 1.7 Hz, 1H), 3.64 – 3.50 (m, 3H), 2.25 – 2.12 (m, 1H), 2.12 – 2.03 (m, 1H), 1.97 – 1.84 (m, 2H), 1.78 – 1.65 (m, 1H), 1.26 (tt, *J* = 10.1, 4.7 Hz, 2H). <sup>13</sup>C NMR (126 MHz, CDCl<sub>3</sub>) δ 164.1, 152.5, 142.9, 133.4, 128.8, 128.2, 127.1, 119.8, 64.5, 52.6, 51.5, 44.3, 44.2, 42.6, 30.7, 25.5, 23.6. HRMS (ESI) *m/z* calculated for C<sub>19</sub>H<sub>22</sub>ClNO<sub>4</sub> [M+H]<sup>+</sup> 364.1310; found, 364.1306.

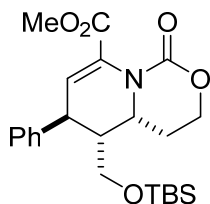

**Compound 4ga.** Following the general procedure, the carbene transfer to furnish **4ga** was conducted on 0.19 mmol scale. The product was purified by silica gel flash column chromatography (0 to 40% EtOAc/Hexanes, 10% increments) to yield **4ga** as a white solid (70.6 mg, 74% yield, >19:1 *dr*). <sup>1</sup>H NMR (500 MHz, CDCl<sub>3</sub>) δ 7.39 – 7.30 (m, 2H), 7.28 (t, *J* = 1.3 Hz, 1H), 7.21 – 7.11 (m, 2H), 6.11 (dd, *J* = 4.6, 1.5 Hz, 1H), 4.37 – 4.21 (m, 2H), 3.87 – 3.71 (m, 6H), 3.46 (dd, *J* = 10.3, 8.4 Hz, 1H), 2.31 (ddt, *J* = 14.4, 11.1, 8.6 Hz, 1H), 2.06 (ddd, *J* = 9.1, 5.4, 1.8 Hz, 1H), 2.03 – 1.93 (m, 1H), 0.93 (s, 9H), 0.08 (s, 6H). <sup>13</sup>C NMR (126 MHz, CDCl<sub>3</sub>) δ 164.4, 152.3, 143.5, 133.2, 128.9, 128.4, 127.1, 120.4, 64.9, 60.8, 52.7, 50.9, 47.7, 40.6, 26.0, 0.2, -5.3. HRMS (ESI) *m/z* calculated for C<sub>23</sub>H<sub>34</sub>NO<sub>5</sub>Si [M+H]<sup>+</sup> 432.2201; found, 432.2201.

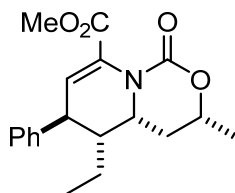

**Compound 4ha.** Following the general procedure, the carbene transfer to furnish **4ha** was conducted on 0.1 mmol scale. The product was purified by silica gel flash column chromatography (0 to 35% EtOAc/Hexanes, 10% increments) to yield compound **4ha** as a colorless waxy solid (24.0 mg, 72% yield, >19:1 *dr*). A residual minor NMR impurity results from the difficulty of separating the C-H insertion product from the aziridine product in the preceding step. <sup>1</sup>H NMR (500 MHz, CDCl<sub>3</sub>) δ 7.34 (dd, *J* = 8.2, 7.0 Hz, 2H), 7.27 (d, *J* = 1.4 Hz, 1H), 7.22 – 7.03 (m, 2H), 6.10 (dd, *J* = 4.6, 1.4 Hz, 1H), 4.49 (dq, *J* = 12.5, 6.3, 1.9 Hz, 1H), 3.84 (s, 3H), 3.71 – 3.66 (m, 1H), 3.65 (d, *J* = 4.6 Hz, 1H), 1.90 (ddd, *J* = 14.0, 8.0, 2.0 Hz, 1H), 1.77 (dt, *J* = 14.0, 11.1 Hz, 1H), 1.62 – 1.53 (m, 2H), 1.37 (d, *J* = 6.2 Hz, 3H), 1.19 – 1.11 (m, 4H). <sup>13</sup>C NMR (126 MHz, CDCl<sub>3</sub>) δ 164.5, 152.8, 143.5, 133.4, 128.8, 128.4, 127.0, 120.3, 72.1, 52.6, 51.4, 47.1, 42.0, 32.7, 20.3, 19.1, 12.3. HRMS (ESI) *m/z* calculated C<sub>19</sub>H<sub>23</sub>NO<sub>4</sub> [M+H]<sup>+</sup> 330.1700; found, 330.1698.

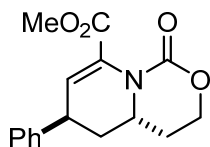

**Compound 4ia.** Following the general procedure, the carbene transfer to furnish **4ia** was conducted on 0.17 mmol scale. The product was purified by silica gel flash column chromatography (0 to 50% EtOAc/Hexanes, 10% increments) to yield **4ia** as a white solid (33.8 mg, 67% yield, >19:1 *dr*). <sup>1</sup>H NMR (500 MHz, CDCl<sub>3</sub>) δ 7.43 – 7.32 (m, 2H), 7.28 (d, *J* = 7.4 Hz, 1H), 7.21 – 7.16 (m, 2H), 6.17 (dd, *J* = 4.3, 1.3 Hz, 1H), 4.38 – 4.23 (m, 2H), 3.84 (s, 3H), 3.72 (ddd, *J* = 6.1, 4.4, 1.6 Hz, 1H), 3.63 (tdd, *J* = 10.5, 6.7, 2.9 Hz, 1H), 2.12 (ddt, *J* = 14.3, 6.7, 2.1 Hz, 1H), 2.09 – 1.95 (m, 2H), 1.90 – 1.73 (m, 1H). <sup>13</sup>C NMR (126 MHz, CDCl<sub>3</sub>) δ 164.7, 151.5, 143.7, 133.1, 128.8, 127.9, 127.1, 121.9, 64.7, 52.5, 49.1, 38.5, 37.2, 29.3. HRMS (ESI) *m/z* calculated for C<sub>16</sub>H<sub>17</sub>NO<sub>4</sub> [M+H]<sup>+</sup> 288.1230; found, 299.1225.

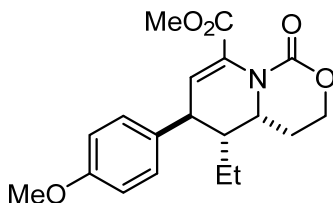

**Compound 4cb.** Following the general procedure, the carbene transfer to furnish **4cb** was conducted on 0.16 mmol scale. The product was purified by silica gel flash column chromatography (0 to 50% EtOAc/hexanes, 10% increments) to yield compound **4cb** as a white solid (42.9 mg, 78% yield, >19:1 *dr*).  $^1\text{H}$  NMR (500 MHz,  $\text{CDCl}_3$ )  $\delta$  7.08 (d,  $J$  = 8.6 Hz, 2H), 6.87 (d,  $J$  = 8.7 Hz, 2H), 6.10 (dd,  $J$  = 4.6, 1.4 Hz, 1H), 4.39 – 4.21 (m, 2H), 3.84 (s, 3H), 3.80 (s, 3H), 3.70 (ddd,  $J$  = 10.1, 8.1, 1.6 Hz, 1H), 3.60 (d,  $J$  = 4.6 Hz, 1H), 2.06 (dtd,  $J$  = 14.2, 10.7, 6.6 Hz, 1H), 1.89 (ddt,  $J$  = 14.3, 8.1, 2.0 Hz, 1H), 1.66 – 1.49 (m, 2H), 1.15 – 1.10 (m, 4H).  $^{13}\text{C}$  NMR (126 MHz,  $\text{CDCl}_3$ )  $\delta$  164.3, 158.5, 152.7, 135.4, 133.0, 129.3, 120.7, 114.0, 64.6, 55.3, 52.5, 51.6, 47.2, 41.0, 25.5, 18.9, 12.2 HRMS (ESI)  $m/z$  calculated for  $\text{C}_{19}\text{H}_{23}\text{NO}_5$   $[\text{M}+\text{H}]^+$  346.164; found, 346.1646.

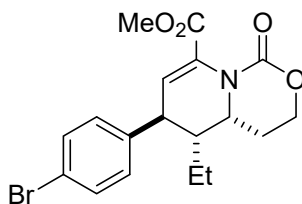

**Compound 4cc.** Following the general procedure, the carbene transfer to furnish **4cc** was conducted on 0.35 mmol scale. The product was purified by silica gel flash column chromatography (0 to 40% EtOAc/Hexanes, 10% increments) to yield **4cc** as a white solid (90.6 mg, 72% yield, >19:1 *dr*).  $^1\text{H}$  NMR (500 MHz,  $\text{CDCl}_3$ )  $\delta$  7.51 – 7.39 (m, 2H), 7.09 – 7.02 (m, 2H), 6.06 (dd,  $J$  = 4.6, 1.5 Hz, 1H), 4.34 – 4.24 (m, 2H), 3.84 (s, 3H), 3.65 (ddd,  $J$  = 10.3, 8.2, 1.6 Hz, 1H), 3.61 (d,  $J$  = 4.6 Hz, 1H), 2.13 – 2.01 (m, 1H), 1.90 (m, , 1H), 1.65 – 1.52 (m, 3H), 1.16 – 1.11 (m, 3H).  $^{13}\text{C}$  NMR (126 MHz,  $\text{CDCl}_3$ )  $\delta$  164.3, 152.7, 142.5, 133.8, 132.0, 130.2, 121.1, 119.6, 64.7, 52.8, 51.8, 47.1, 41.4, 25.7, 19.1, 12.3. HRMS (ESI)  $m/z$  calculated for  $\text{C}_{18}\text{H}_{20}\text{BrNO}_4\text{Na}$   $[\text{M}+\text{Na}]^+$  416.0468; found, 416.0461.

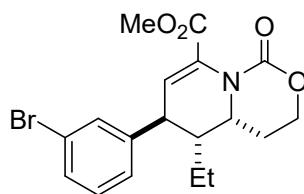

**Compound 4cd.** Following the general procedure, the carbene transfer to furnish **4cd** was conducted on 0.12 mmol scale. The product was purified by silica gel flash chromatography (0 to 50% EtOAc/hexanes, 10% increments) to yield **4cd** as a white solid (34.6 mg, 73% yield, >19:1 *dr*).  $^1\text{H}$  NMR (500 MHz,  $\text{CDCl}_3$ )  $\delta$  7.40 (dt,  $J = 8.4, 1.2$  Hz, 1H), 7.29 (d,  $J = 1.9$  Hz, 1H), 7.22 (t,  $J = 7.8$  Hz, 1H), 7.10 (dt,  $J = 7.7, 1.4$  Hz, 1H), 6.05 (dd,  $J = 4.6, 1.5$  Hz, 1H), 4.42 – 4.24 (m, 2H), 3.84 (s, 3H), 3.67 (ddd,  $J = 10.2, 8.1, 1.6$  Hz, 1H), 3.62 (d,  $J = 4.6$  Hz, 1H), 2.07 (dtd,  $J = 14.3, 11.0, 5.9$  Hz, 1H), 1.92 (ddt,  $J = 14.3, 8.1, 2.0$  Hz, 1H), 1.66 – 1.53 (m, 2H), 1.13 (dd,  $J = 6.0, 3.5$  Hz, 4H).  $^{13}\text{C}$  NMR (126 MHz,  $\text{CDCl}_3$ )  $\delta$  164.2, 152.8, 145.9, 134.0, 131.4, 130.4, 130.3, 127.2, 123.1, 119.3, 64.7, 52.8, 51.9, 47.1, 41.6, 25.6, 19.1, 12.3. HRMS (ESI)  $m/z$  calculated for  $\text{C}_{18}\text{H}_{20}\text{BrNO}_4$  [2M+ $\text{NH}_4$ ] $^+$  804.1490; found, 804.1501.

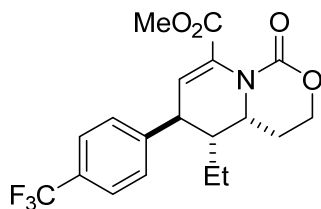

**Compound 4ce.** Following the general procedure, the carbene transfer to furnish **4ce** was conducted on 0.25 mmol scale using 4 mol% of  $\text{Rh}_2\text{OAc}_4$ . The product was purified by silica gel flash column chromatography (0 to 40% EtOAc/Hexanes, 10% increments) to yield **4ce** as a white solid (67.8 mg, 69% yield, >19:1 *dr*).  $^1\text{H}$  NMR (500 MHz,  $\text{CDCl}_3$ )  $\delta$  7.61 (d,  $J = 8.1$  Hz, 2H), 7.30 (d,  $J = 8.0$  Hz, 2H), 6.08 (dd,  $J = 4.6, 1.4$  Hz, 1H), 4.31 (t,  $J = 1.6$  Hz, 1H), 3.84 (s, 3H), 3.72 (d,  $J = 4.6$  Hz, 1H), 3.67 (ddd,  $J = 10.1, 8.1, 1.6$  Hz, 1H), 2.12 – 2.05 (m, 1H), 1.92 (ddt,  $J = 14.3, 8.1, 2.0$  Hz, 1H), 1.67 – 1.56 (m, 2H), 1.21 – 1.12 (m, 3H).  $^{13}\text{C}$  NMR (126 MHz,  $\text{CDCl}_3$ )  $\delta$  164.2, 152.7, 147.5, 134.0, 129.5, 128.8,

125.8, 119.1, 64.7, 52.7, 51.8, 46.9, 41.7, 25.5, 19.1, 12.2. HRMS (ESI)  $m/z$  calculated for  $C_{19}H_{21}F_3NO_4$   $[M+H]^+$  384.1417; found, 384.1407.

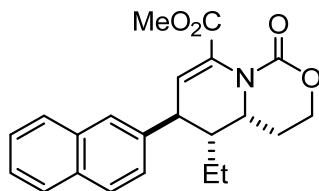

**Compound 4cf.** Following the general procedure, the carbene transfer to furnish **4cf** was conducted on 0.1 mmol scale. The product was purified by silica gel flash chromatography (0 to 50% EtOAc/hexanes, 10% increments) to yield **4cf** as a white solid (28.4 mg, 78% yield, >19:1 *dr*).  $^1H$  NMR (500 MHz,  $CDCl_3$ )  $\delta$  7.98 – 7.61 (m, 3H), 7.62 – 7.41 (m, 3H), 7.31 (dd,  $J$  = 8.5, 1.9 Hz, 1H), 6.23 (dd,  $J$  = 4.6, 1.5 Hz, 1H), 4.37 – 4.22 (m, 2H), 3.89 (s, 3H), 3.81 (d,  $J$  = 4.6 Hz, 1H), 3.76 (ddd,  $J$  = 10.2, 8.2, 1.7 Hz, 1H), 2.17 – 1.98 (m, 1H), 1.84 (ddt,  $J$  = 14.2, 8.1, 2.0 Hz, 1H), 1.73 – 1.67 (m, 1H), 1.68 – 1.58 (m, 1H), 1.24 – 1.16 (m, 4H).  $^{13}C$  NMR (126 MHz,  $CDCl_3$ )  $\delta$  164.4, 152.9, 140.8, 133.7, 133.3, 132.4, 128.8, 127.9, 127.7, 127.1, 126.7, 126.6, 126.2, 120.4, 64.7, 52.7, 51.8, 46.8, 42.0, 25.6, 19.1, 12.3. HRMS (ESI)  $m/z$  calculated for  $C_{22}H_{23}NO_4$   $[M+H]^+$  366.1700; found, 366.1697.

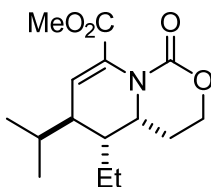

**Compound 4cg.** Following the general procedure, the carbene transfer to furnish **4cg** was conducted on 0.18 mmol scale. The product was purified by silica gel flash chromatography (0 to 50% EtOAc/hexanes, 10% increments) to yield (0 to 50% EtOAc/hexanes, 10% increments) **4cg** as a white solid (38.0 mg, 75% yield, >19:1 *dr*).  $^1H$  NMR (500 MHz,  $CDCl_3$ )  $\delta$  6.11 (dd,  $J$  = 4.5, 1.5 Hz, 1H), 4.31 (dd,  $J$  = 9.0, 2.2 Hz, 2H), 3.79 (s, 3H), 3.67 (ddd,  $J$  = 10.3, 8.2, 1.8 Hz, 1H), 2.20 – 2.03 (m, 2H), 1.89 (dd,  $J$  =

8.3, 4.5 Hz, 1H), 1.62 – 1.56 (m, 1H), 1.49 (ttd,  $J = 10.7, 7.5, 6.6, 4.2$  Hz, 2H), 1.03 (d,  $J = 6.7$  Hz, 3H), 1.00 – 0.89 (m, 7H).  $^{13}\text{C}$  NMR (126 MHz,  $\text{CDCl}_3$ )  $\delta$  164.3, 152.7, 131.2, 123.6, 64.6, 53.7, 52.3, 43.7, 41.0, 33.0, 25.8, 21.1, 20.7, 19.0, 11.7 HRMS (ESI)  $m/z$  calculated for  $\text{C}_{15}\text{H}_{23}\text{NO}_4$   $[\text{M}+\text{H}]^+$  282.1700; found, 282.1698.

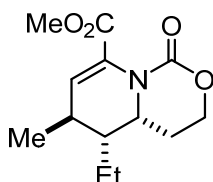

**Compound 4ch.** Following the general procedure, the carbene transfer to furnish **4ch** was conducted on 0.18 mmol scale. The product was purified by silica gel flash column chromatography (0 to 50% EtOAc/hexanes, 10% increments) to yield **4ch** as a white solid (30.5 mg, 69% yield, >19:1 *dr*).  $^1\text{H}$  NMR (500 MHz,  $\text{CDCl}_3$ )  $\delta$  6.02 (dd,  $J = 4.5, 1.4$  Hz, 1H), 4.41 – 4.26 (m, 2H), 3.77 (s, 3H), 3.73 (ddd,  $J = 10.2, 8.2, 1.7$  Hz, 1H), 2.41 (qd,  $J = 7.2, 4.4$  Hz, 1H), 2.23 – 2.02 (m, 2H), 1.49 (ddt,  $J = 13.4, 7.1, 3.9$  Hz, 1H), 1.35 (d,  $J = 9.4$  Hz, 1H), 1.09 (d,  $J = 7.2$  Hz, 3H), 0.94 (m, 4H).  $^{13}\text{C}$  NMR (126 MHz,  $\text{CDCl}_3$ )  $\delta$  164.4, 152.9, 130.9, 126.4, 64.7, 52.6, 52.5, 45.0, 31.3, 25.9, 21.8, 19.1, 12.1 HRMS (ESI)  $m/z$  calculated for  $\text{C}_{13}\text{H}_{19}\text{NO}_4$   $[\text{M}+\text{H}]^+$  254.1387; found, 254.1385.

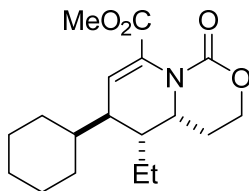

**Compound 4ci.** Following the general procedure, the carbene transfer to furnish **4ci** was conducted on 0.35 mmol scale. The product was purified by silica gel flash column chromatography (0 to 50% EtOAc/Hexanes, 10% increments) to yield **4ci** as a white solid (77.3 mg, 70% yield, >19:1 *dr*).  $^1\text{H}$  NMR (500 MHz,  $\text{CDCl}_3$ )  $\delta$  6.10 (dd,  $J = 4.6, 1.4$  Hz, 1H), 4.31 (dd,  $J = 7.7, 1.9$  Hz, 2H), 3.78 (s, 3H), 3.68 (ddd,  $J = 10.2, 8.2, 1.7$  Hz, 1H), 2.17 – 2.06 (m, 1H), 1.97 (dd,  $J = 7.7, 4.5$  Hz, 1H), 1.88 – 1.44 (m, 9H), 1.33 – 1.07 (m, 5H), 1.00 – 0.86 (m, 4H).  $^{13}\text{C}$  NMR (126 MHz,  $\text{CDCl}_3$ )  $\delta$  164.5, 152.9, 131.3, 123.8,

64.8, 54.1, 52.5, 43.0, 42.7, 41.0, 31.5, 31.2, 26.5, 26.0, 19.2, 12.0. HRMS (ESI)  $m/z$  calculated for  $C_{18}H_{28}NO_4$   $[M+H]^+$  322.2013; found, 322.2010.

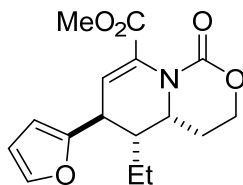

**Compound 4cj.** Following the general procedure, the carbene transfer to furnish **4cj** was conducted on 0.3542 mmol scale. The product was purified by silica gel flash column chromatography (0 to 50% EtOAc/Hexanes, 10% increments) to yield **4cj** as a yellow solid (15.7 mg, 14% yield, >19:1 *dr*).  $^1H$  NMR (500 MHz,  $CDCl_3$ )  $\delta$  7.36 (dd,  $J = 1.9, 0.8$  Hz, 1H), 6.31 (dd,  $J = 3.2, 1.9$  Hz, 1H), 6.08 (dd,  $J = 4.6, 1.4$  Hz, 1H), 6.03 (dd,  $J = 3.2, 0.9$  Hz, 1H), 4.43 – 4.23 (m, 2H), 3.84 – 3.74 (m, 5H), 3.65 (d,  $J = 4.7$  Hz, 1H), 2.15 – 2.05 (m, 1H), 2.01 (ddt,  $J = 14.3, 8.2, 2.1$  Hz, 1H), 1.90 – 1.80 (m, 1H), 1.62 – 1.49 (m, 1H), 1.12 – 1.02 (m, 3H).  $^{13}C$  NMR (126 MHz,  $CDCl_3$ )  $\delta$  164.3, 155.4, 142.2, 133.3, 118.2, 110.4, 107.4, 64.8, 53.2, 52.7, 43.0, 36.4, 25.7, 18.6, 12.1. HRMS (ESI)  $m/z$  calculated for  $C_{16}H_{20}NO_5$   $[M+H]^+$  306.1336; found, 306.1331.

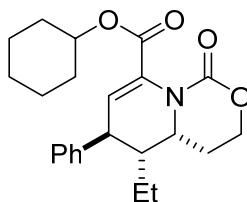

**Compound 4ck.** Following the general procedure, the carbene transfer to furnish **4ck** was conducted on 0.25 mmol scale. The product was purified by silica gel flash column chromatography (0 to 50% EtOAc/Hexanes, 10% increments) to yield **4ck** as a white solid (52.9 mg, 56% yield, >19:1 *dr*).  $^1H$  NMR (500 MHz,  $CDCl_3$ )  $\delta$  7.35 (dd,  $J = 8.2, 6.9$  Hz, 2H), 7.30 – 7.26 (m, 1H), 7.19 – 7.13 (m, 2H), 6.10 (dd,  $J = 4.6, 1.4$  Hz, 1H), 4.91 (tt,  $J = 8.9, 3.9$  Hz, 1H), 4.31 – 4.25 (m, 2H), 3.72 (ddd,  $J = 10.4, 8.2, 1.5$  Hz, 1H), 3.65 (d,  $J = 4.5$  Hz, 1H), 2.13 – 1.85 (m, 2H), 1.75 (td,  $J = 8.6, 8.1, 3.9$  Hz, 2H), 1.66 – 1.46 (m, 6H), 1.45 – 1.34 (m, 1H), 1.33 – 1.16 (m, 2H), 1.15 (t,  $J = 4.8$  Hz, 3H).  $^{13}C$  NMR

(126 MHz, CDCl<sub>3</sub>)  $\delta$  163.3, 152.8, 143.8, 134.2, 128.9, 128.5, 127.0, 120.1, 64.7, 51.9, 47.3, 42.0, 31.7, 31.5, 25.8, 25.6, 24.0, 19.2, 12.4, 0.2. HRMS (ESI)  $m/z$  calculated for C<sub>23</sub>H<sub>30</sub>NO<sub>4</sub> [M+H]<sup>+</sup> 384.2169; found, 384.2165.

### Piperidine derivatizations

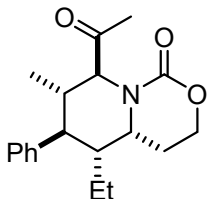

**Compound 6.** In accordance with literature conditions,<sup>9</sup> a flame-dried round bottom flask was charged with piperidine **4ca** (0.23 mmol, 1 equiv) and diluted to 0.01 M with freshly distilled ether. This solution was cooled to -78 °C and allowed to stir while a second flame-dried round bottom flask was charged with CuCN (1.2 mmol, 5 equiv) and diluted with 12 mL of freshly distilled ether (0.1 M) and cooled to -35 °C. To the flask containing CuCN was added a solution of MeLi dropwise (1.5 mL, 1.6 M solution in Et<sub>2</sub>O, 10 equiv). After five minutes, the mixture was warmed up to 0 °C and allowed to stir for 30 additional minutes. After this period, the solution was cannula transferred to the cooled mixture of **4ca** in Et<sub>2</sub>O. After five minutes, the reaction mixture was allowed to warm to room temperature and stirred until TLC indicated complete consumption of the starting material. The reaction was then quenched with saturated NH<sub>4</sub>Cl and diluted with CH<sub>2</sub>Cl<sub>2</sub>. This biphasic mixture was filtered to remove solids and the resulting biphasic mixture transferred to a separatory funnel. The layers were separated, and the aqueous layer extracted with three portions of CH<sub>2</sub>Cl<sub>2</sub>. The organics were combined, dried with Na<sub>2</sub>SO<sub>4</sub>, and the volatiles concentrated under reduced pressure and purified by silica gel flash chromatography. (0 to 20% EtOAc/CH<sub>2</sub>Cl<sub>2</sub>, 10% increments) to yield **6** as a light-yellow oil (42.0 mg 57% yield). The minor NMR impurity is attributed to the conjugate addition product containing the ester. <sup>1</sup>H NMR (500 MHz, CDCl<sub>3</sub>)  $\delta$  7.38 – 7.29 (m, 3H), 7.26 – 7.20 (m, 1H), 7.19 – 7.14 (m, 3H), 4.41 (d,  $J$  = 7.6 Hz, 1H), 4.39 – 4.35 (m, 1H), 4.35 – 4.26 (m, 2H), 2.48 (ddd,  $J$  = 14.0, 6.8, 3.4 Hz, 1H), 2.34 (s, 3H), 2.17 (dd,  $J$  = 10.6, 6.8 Hz, 1H), 2.13 – 2.02 (m, 2H), 1.96 (ddt,  $J$  = 13.8, 5.4, 2.8 Hz, 1H), 1.77 (qd,  $J$  = 6.9, 4.6 Hz, 1H), 1.40 – 1.30 (m, 1H), 1.12 (dt,  $J$  = 14.3, 7.2 Hz, 1H), 0.93 –

0.81 (m, 8H).  $^{13}\text{C}$  NMR (126 MHz,  $\text{CDCl}_3$ )  $\delta$  208.5, 154.8, 144.4, 128.9, 127.9, 126.9, 66.7, 65.4, 52.9, 50.2, 45.0, 36.8, 29.4, 24.1, 23.1, 18.3, 11.6. HRMS (ESI)  $m/z$  calculated for  $\text{C}_{19}\text{H}_{25}\text{NO}_3$   $[\text{M}+\text{H}]^+$  316.1907; found, 316.108.

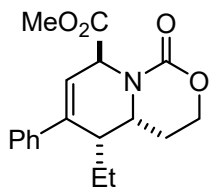

**Compound 7.** A flame-dried round bottom flask was charged with piperidine **4ca** and diluted with MeCN (0.1 mmol). To this solution was added DBU, dropwise (0.951 mmol, 3 equiv). This mixture was heated to 50 °C and was allowed to stir until TLC indicated completion (approximately 18 h). After TLC indicated complete consumption of the starting material the solution was cooled to room temperature and quenched with saturated  $\text{NH}_4\text{Cl}^+$  and extracted with three portions of EtOAc. The combined organic layers were dried with  $\text{Na}_2\text{SO}_4$ , concentrated under reduced pressure and purified by silica gel flash column chromatography (0 to 60% EtOAc/Hexanes) to yield Compound **7** as a viscous light-yellow oil (75.3 mg, 74% yield).  $^1\text{H}$  NMR (500 MHz,  $\text{CDCl}_3$ )  $\delta$  7.36 (d,  $J = 4.3$  Hz, 4H), 7.32 (dd,  $J = 4.9, 3.7$  Hz, 1H), 6.08 (d,  $J = 3.8$  Hz, 1H), 5.28 (d,  $J = 3.8$  Hz, 1H), 4.44 – 4.29 (m, 2H), 4.01 (ddd,  $J = 9.6, 6.1, 3.2$  Hz, 1H), 3.76 (s, 3H), 2.77 (dp,  $J = 5.4, 3.4, 2.2$  Hz, 1H), 2.29 (dtd,  $J = 14.3, 9.8, 4.6$  Hz, 1H), 2.15 (dddd,  $J = 13.7, 6.5, 4.1, 2.8$  Hz, 1H), 1.57 (ddtd,  $J = 32.4, 14.4, 7.4, 5.4$  Hz, 2H), 0.76 (t,  $J = 7.5$  Hz, 3H).  $^{13}\text{C}$  NMR (126 MHz,  $\text{CDCl}_3$ )  $\delta$  170.7, 154.8, 142.8, 140.0, 128.8, 128.2, 126.1, 118.6, 64.8, 57.1, 53.9, 52.8, 41.3, 25.6, 21.8, 11.8  $\delta$  HRMS (ESI)  $m/z$  calculated for  $\text{C}_{18}\text{H}_{21}\text{NO}_4$   $[\text{M}+\text{H}]^+$  316.1543; found, 316.1540.

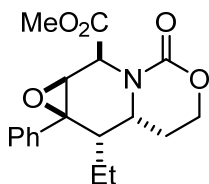

**Compound 8.** To a flame dried round bottom flask was added Compound **7**,  $\text{CH}_2\text{Cl}_2$  (0.05 M), and *m*CPBA (2.8 equiv 0.22 mmol). The round bottom flask was fitted with a

reflux condenser and allowed to stir at reflux until TLC indicated complete consumption of the starting material. Once complete, the reaction was quenched with H<sub>2</sub>O and diluted with CH<sub>2</sub>Cl<sub>2</sub>. The biphasic mixture was transferred to a separatory funnel and the layers separated. The aqueous layer was extracted with three portions of CH<sub>2</sub>Cl<sub>2</sub> and the combined organics dried over MgSO<sub>4</sub>. The volatiles were then concentrated under reduced pressure and purified by silica gel flash column chromatography (0 to 60% EtOAc/Hexanes) to yield **8** as an off-white solid (21.7 mg, 83% yield). <sup>1</sup>H NMR (500 MHz, CDCl<sub>3</sub>) δ 7.48 – 7.34 (m, 5H), 5.17 (d, *J* = 3.6 Hz, 1H), 4.42 – 4.28 (m, 2H), 4.16 (ddd, *J* = 11.2, 6.1, 2.8 Hz, 1H), 4.06 (dd, *J* = 3.6, 1.0 Hz, 1H), 3.82 (s, 3H), 2.24 (q, *J* = 3.5 Hz, 1H), 2.20 – 2.09 (m, 1H), 1.95 (ddt, *J* = 13.9, 5.9, 2.5 Hz, 1H), 1.48 (dtd, *J* = 9.7, 7.5, 4.0 Hz, 2H), 0.76 (t, *J* = 7.6 Hz, 3H). <sup>13</sup>C NMR (126 MHz, CDCl<sub>3</sub>) δ 169.2, 154.6, 137.4, 129.1, 128.9, 127.7, 65.1, 64.8, 56.0, 54.8, 53.0, 50.7, 43.0, 25.5, 19.0, 12.8. HRMS (ESI) *m/z* calculated for C<sub>18</sub>H<sub>21</sub>NO<sub>5</sub> [M+H]<sup>+</sup> 332.1493; found, 332.1484.

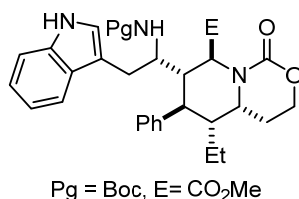

**Compound 10.** In accordance with literature conditions,<sup>27</sup> to a flame dried vial equipped with a Teflon septum was added piperidine **4ca**, Compound **9**, Ir[DF(CF<sub>3</sub>)ppy]<sub>2</sub>(dtbbpy)PF<sub>6</sub> (.01 equiv, 1.1mg), K<sub>2</sub>HPO<sub>4</sub> (1.2 equiv, 20.9 mg), and DMF (0.4 M). The reaction mixture was degassed *via* a stream of nitrogen for 15 minutes and then irradiated with a 26W fluorescent lamp (2 cm from light source). After 36 hours the reaction mixture was diluted with saturated aqueous NaHCO<sub>3</sub> solution and extracted with three portions of Et<sub>2</sub>O. The combined organics were washed with water and brine, then dried with MgSO<sub>4</sub>. The crude material was concentrated under reduced pressure and purified by silica gel flash column chromatography (20 to 100% EtOAc/Hex) to yield **10** as a light yellow solid (18.0 mg, 32% yield, 45% yield BRSM). The remainder of the mass balance appeared to be a Boc deprotected-**10** with no other products or diastereomer detected *via* NMR. <sup>1</sup>H NMR (500 MHz, CDCl<sub>3</sub>) δ 7.86 (s, 1H), 7.32 (d, *J* = 7.9 Hz, 1H), 7.24 (d, *J* = 8.1 Hz, 1H), 7.19 (t, *J* = 7.4 Hz, 2H), 7.14 (d, *J* = 7.1 Hz, 1H), 7.12 – 7.07

(m, 2H), 6.94 (t,  $J = 7.5$  Hz, 1H), 6.59 (d,  $J = 2.4$  Hz, 1H), 5.31 – 5.28 (m, 1H), 4.49 – 4.42 (m, 1H), 4.36 (td,  $J = 11.2, 4.3$  Hz, 1H), 4.22 – 4.13 (m, 1H), 4.14 – 4.04 (m, 1H), 3.85 (bs, 1H), 3.73 (s, 3H), 2.90 (dd,  $J = 15.1, 7.2$  Hz, 1H), 2.86 – 2.72 (m, 2H), 2.49 (dd,  $J = 12.6, 9.8$  Hz, 1H), 1.90 (m, 2H), 1.75 (td,  $J = 13.1, 12.1, 5.6$  Hz, 1H), 1.63 (bs, 1H), 1.42 (s, 9H), 1.07 – 0.97 (m, 1H), 0.92 – 0.80 (m, 1H), 0.67 (t,  $J = 7.4$  Hz, 3H).  $^{13}\text{C}$  NMR (126 MHz,  $\text{CDCl}_3$ )  $\delta$  173.2, 156.5, 154.2, 141.8, 136.1, 129.0, 128.6, 127.6, 126.7, 122.1, 121.8, 119.3, 118.9, 112.1, 110.8, 78.8, 66.7, 53.9, 53.0, 52.7, 50.8, 49.4, 43.1, 40.6, 29.9, 28.6, 22.3, 22.0, 11.6. HRMS (ESI)  $m/z$  calculated for  $\text{C}_{33}\text{H}_{41}\text{N}_3\text{O}_6$   $[\text{M}+\text{H}]^+$  576.3068; found, 576.3063.

### Transfer of chirality experiments

The enantioenriched bicyclic aziridine (*S,R*)-**2a** was synthesized as described above and its enantiopurity determined by SFC/MS. SFC/MS analyses were performed on a Waters ACQUITY UPC<sup>2</sup> equipped with ACQUITY UPC<sup>2</sup> PDA and ACQUITY QDa Detector. A CHIRALPAK IC-3 column (3mm ID  $\times$  150 mm L, 3  $\mu\text{m}$  PS) was used for enantioselective separations. The eluent was a mixture (97:3  $\text{CO}_2$ / iPrOH) with a flow rate of 0.8 mL/min at 40  $^\circ\text{C}$  with an ABPR at 2200 psi.

**Supplementary Figure 1.** Racemic standard for (*S,R*)-**2a**.

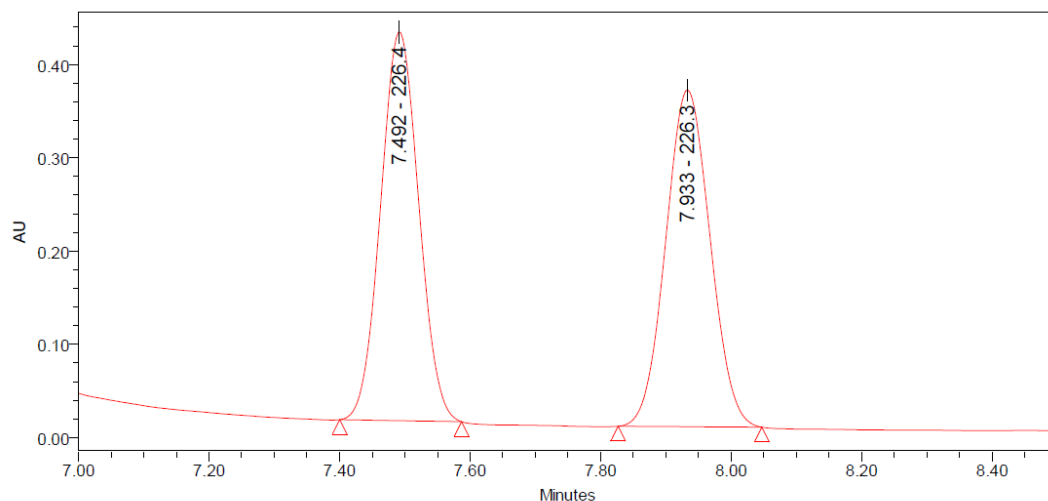

| Peak # | Retention Time | Area    | % Area |
|--------|----------------|---------|--------|
| 1      | 7.492          | 1694026 | 49.8%  |
| 2      | 7.933          | 1704523 | 50.2%  |

**Supplementary Figure 2.** Scalemic aziridine (*S,R*)-**2a** utilized in the synthesis of (*R,R,R*)-**4aa**.

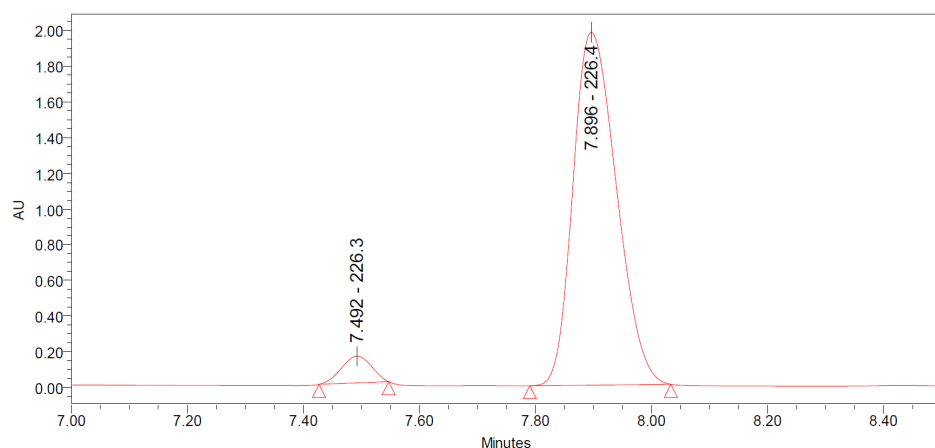

| Peak # | Retention Time | Area     | % Area |
|--------|----------------|----------|--------|
| 1      | 7.492          | 605058   | 5.5%   |
| 2      | 7.896          | 10330501 | 94.5%  |

**Supplementary Figure 3.** Scalemic aziridine (*S,R*)-**2a** utilized in the synthesis of **7b**.

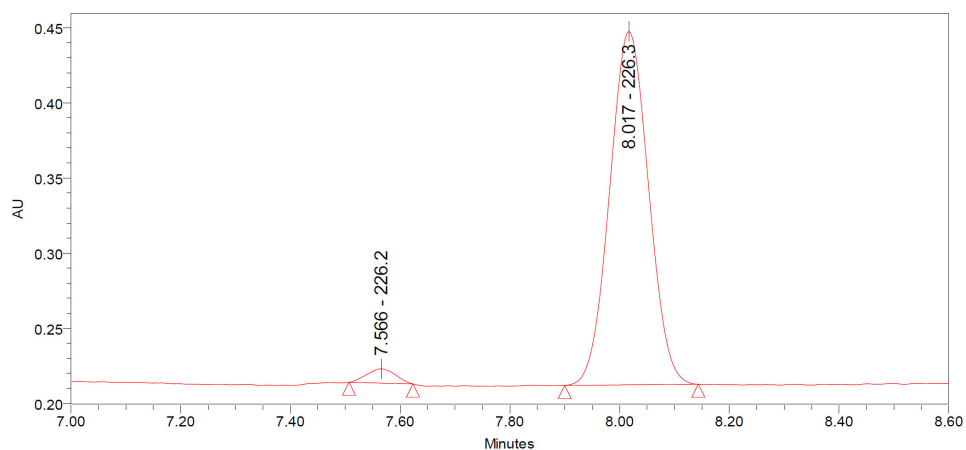

| Peak # | Retention Time | Area | % Area |
|--------|----------------|------|--------|
|--------|----------------|------|--------|

|   |       |         |        |
|---|-------|---------|--------|
| 1 | 7.566 | 40759   | 2.89%  |
| 2 | 8.017 | 1367360 | 97.11% |

HPLC conditions – chromatograms of piperidine products were acquired on a Shimadzu Prominence HPLC equipped with a Chiracel AD-H column. Flow rate: 1.00 mL/min.; Oven temp 25.0 °C for compound **4a**, (*rac*)-**4a**, and scalemic (*S,R*)-**4a**; Solvent: 5:95 *i*PrOH:hexane, increasing to 30:70 *i*PrOH:hexane over 30 minutes. The eluent was held at the more polar composition for another 20 minutes to complete the analysis. Detector: UV @ 254 nm:

**Supplementary Figure 4. Racemic piperidine (*R,R,R*)-**4aa**.**

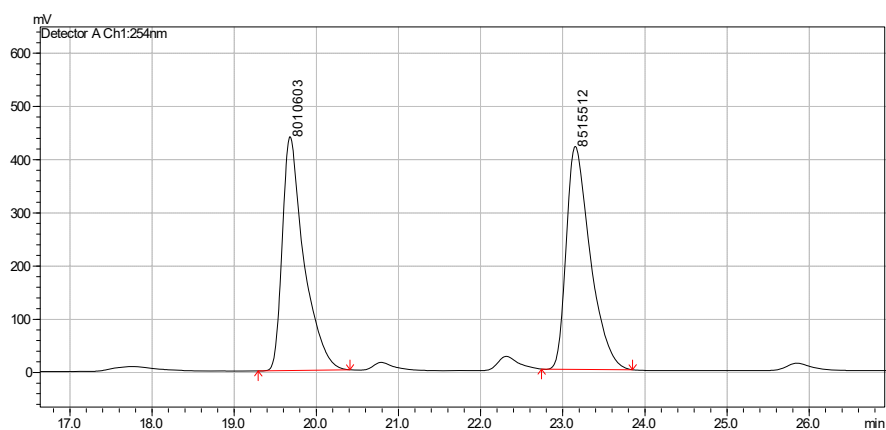

| Peak # | Retention Time | Area    | % Area |
|--------|----------------|---------|--------|
| 1      | 19.676         | 8010603 | 48.5%  |
| 2      | 23.148         | 8515512 | 51.5%  |

**Supplementary Figure 5.** Scalemic piperidine (*R,R,R*)-**4aa**.

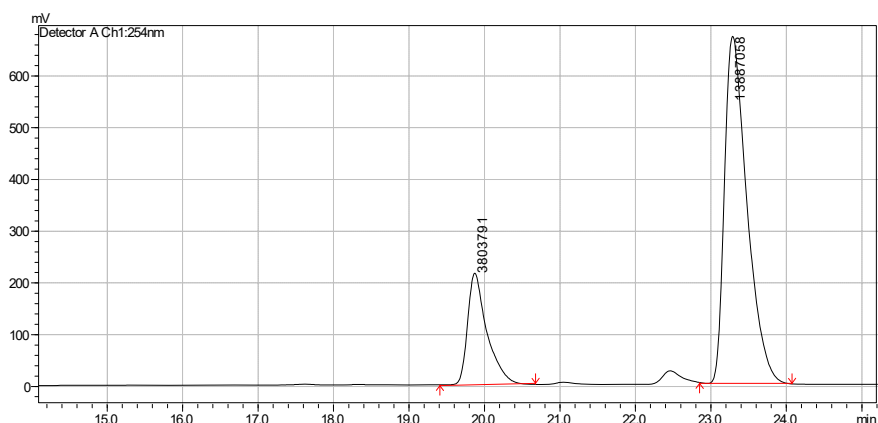

| Peak # | Retention Time | Area     | % Area |
|--------|----------------|----------|--------|
| 1      | 19.870         | 3803791  | 21.5%  |
| 2      | 23.218         | 13887058 | 78.5%  |

### Piperidine analogues of select biomolecules

The following molecules shown are synthetic intermediates accessed in pursuit of **7b** and **8b**, as well as characterization data regarding **7b** and **8b**. All intermediates not shown are known compounds and were synthesized according to published literature procedures and characterized therein.<sup>8-10</sup>

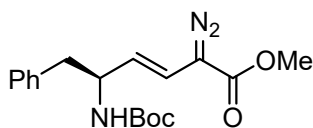

**Compound 11a.** Following the general procedure provided in Section IV the reaction to furnish diazoester **11a** was conducted on 2.50 mmol scale utilizing 10 equiv of *p*-ABSA and 2.6 equiv of DBU. The product was purified by silica gel flash column chromatography (30% Et<sub>2</sub>O/pentane) to yield **11a** as a red oil (741.1 mg, 86% yield). <sup>1</sup>H NMR (500 MHz, CDCl<sub>3</sub>) δ 7.22 (td, *J* = 7.2, 6.3, 1.4 Hz, 2H), 7.18 – 7.12 (m, 1H), 7.09 (dd, *J* = 7.0, 1.8 Hz, 2H), 5.92 – 5.73 (m, 1H), 5.26 (dd, *J* = 15.8, 5.0 Hz, 1H), 4.45 (s, 2H), 3.72 (s, 3H), 2.78 (d, *J* = 5.7 Hz, 2H), 1.33 (s, 9H). <sup>13</sup>C NMR (126 MHz, CDCl<sub>3</sub>) δ

164.5, 154.0, 136.1, 128.4, 127.4, 125.6, 123.2, 112.5, 52.0, 51.1, 40.9, 27.3. HRMS (ESI)  $m/z$  calculated for  $C_{18}H_{23}N_3O_4$   $[M+NH_4]^+$  363.2027; found, 363.2025.

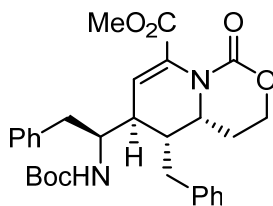

**Compound 12a.** The general procedure was followed, utilizing (*S,R*)-**2a** as the substrate. The carbene transfer to furnish **12a** was conducted on 0.1 mmol scale. The product was purified by silica gel flash chromatography (0 to 30% EtOAc/ $CH_2Cl_2$ , 10% increments) to yield **12a** as a white solid (24.4 mg, 47% yield, >19:1 *dr*).  $^1H$  NMR (500 MHz,  $CDCl_3$ )  $\delta$  7.25 – 7.18 (m, 3H), 7.16 – 7.13 (m, 3H), 7.03 (d,  $J$  = 7.2 Hz, 2H), 6.78 (dd,  $J$  = 6.5, 2.9 Hz, 2H), 6.00 (d,  $J$  = 4.3 Hz, 1H), 4.41 – 4.34 (m, 2H), 4.25 (d,  $J$  = 10.1 Hz, 1H), 4.02 (dd,  $J$  = 10.4, 8.3 Hz, 1H), 3.81 (s, 3H), 3.76 (q,  $J$  = 5.7 Hz, 1H), 2.91 – 2.82 (m, 1H), 2.58 (qd,  $J$  = 14.1, 6.9 Hz, 2H), 2.36 – 2.19 (m, 3H), 2.13 (dd,  $J$  = 14.2, 8.3 Hz, 1H), 1.36 (s, 9H).  $^{13}C$  NMR (126 MHz,  $CDCl_3$ )  $\delta$  164.0, 155.4, 152.6, 138.5, 136.7, 133.6, 129.1, 128.9, 128.7, 128.6, 126.6, 126.5, 79.8, 64.7, 55.9, 53.9, 52.5, 42.8, 39.2, 38.7, 32.5, 29.7, 28.2, 25.7. HRMS (ESI)  $m/z$  calculated for  $C_{30}H_{36}N_2O_6$   $[2M+NH_4]^+$  1058.5485; found, 1058.5497.

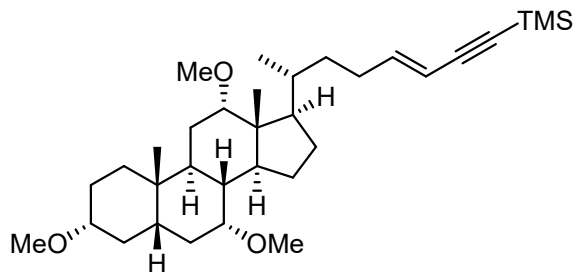

**Compound S1.** In accordance with literature conditions,<sup>8</sup> the reaction to furnish ene-yne **S1** was conducted on a 4.94 mmol scale. The product was purified *via* automated flash chromatography using a 0-10% gradient of EtOAc/ $CH_2Cl_2$  to yield **S1** as clear viscous oil. This was isolated as an inseparable mixture of *trans* and *cis*-isomers, with only the major *trans* product characterized (1.32 g, 51%, 4:1 *trans:cis*).  $^1H$  NMR (500 MHz,

C<sub>6</sub>D<sub>6</sub>)  $\delta$  6.27 (dt,  $J$  = 15.8, 7.1 Hz, 1H), 5.60 (dt,  $J$  = 16.0, 1.5 Hz, 1H), 3.26 (s, 3H), 3.23 (s, 1H), 3.07 (s, 1H), 3.05 (s, 3H), 3.02 (s, 3H), 2.96 (tt,  $J$  = 11.0, 4.2 Hz, 1H), 2.56 – 2.40 (m, 3H), 2.31 (td,  $J$  = 12.3, 4.4 Hz, 1H), 2.07 (q,  $J$  = 9.8 Hz, 1H), 1.98 (tt,  $J$  = 11.3, 5.6 Hz, 1H), 1.88 – 1.70 (m, 7H), 1.57 – 1.48 (m, 3H), 1.48 – 1.35 (m, 5H), 1.30 (ddq,  $J$  = 10.2, 6.8, 2.9 Hz, 2H), 1.26 – 1.18 (m, 1H), 1.13 – 1.01 (m, 4H), 0.58 (s, 3H), 0.42 (s, 3H), 0.22 (s, 9H). <sup>13</sup>C NMR (126 MHz, C<sub>6</sub>D<sub>6</sub>)  $\delta$  147.0, 110.3, 105.3, 92.8, 82.0, 81.0, 77.4, 55.8, 55.4, 46.8, 46.6, 42.9, 42.4, 40.2, 35.8, 35.5, 35.3, 35.2, 30.1, 28.4, 28.1, 27.8, 27.6, 23.7, 23.3, 22.3, 17.8, 12.7, 0.2. HRMS (ESI)  $m/z$  calculated for C<sub>33</sub>H<sub>56</sub>O<sub>3</sub>Si [M+NH<sub>4</sub>]<sup>+</sup> 546.4337; found, 546.336.

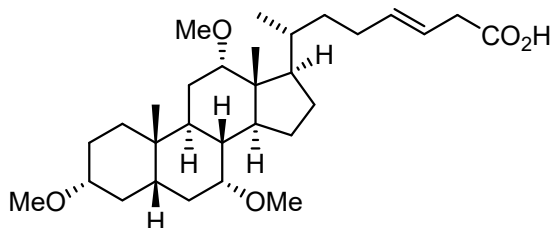

**Compound S2.** In accordance with literature conditions,<sup>11</sup> the hydroboration oxidation reaction of ene-yne **S1** to furnish carboxylic acid **S2** was conducted on a 2.5 mmol scale. The product was purified by acid-base extraction to remove the cyclohexanol impurity and was isolated as a white solid. The crude material was utilized in the next reaction (0.834 g, 67%, 6:1 *trans:cis*). Overintegration in the <sup>1</sup>H NMR is attributed to the *cis*-isomer. <sup>1</sup>H NMR (500 MHz, C<sub>6</sub>D<sub>6</sub>)  $\delta$  5.60 – 5.51 (m, 1H), 5.39 (dt,  $J$  = 14.6, 6.7 Hz, 1H), 3.28 (d,  $J$  = 3.0 Hz, 1H), 3.27 (s, 3H), 3.08 (s, 3H), 3.06 – 3.04 (m, 1H), 3.04 (s, 3H), 2.97 (tt,  $J$  = 11.5, 4.6 Hz, 1H), 2.81 (d,  $J$  = 6.9 Hz, 2H), 2.56 – 2.42 (m, 2H), 2.33 (td,  $J$  = 12.3, 4.2 Hz, 1H), 2.17 (q,  $J$  = 9.8 Hz, 1H), 2.12 – 2.03 (m, 1H), 1.97 – 1.70 (m, 8H), 1.70 – 1.60 (m, 3H), 1.61 – 1.28 (m, 9H), 1.28 – 1.19 (m, 2H), 1.13 – 1.02 (m, 3H), 0.98 (d,  $J$  = 6.6 Hz, 3H), 0.87 (s, 3H), 0.65 (s, 3H). <sup>13</sup>C NMR (126 MHz, C<sub>6</sub>D<sub>6</sub>)  $\delta$  176.6, 135.8, 121.6, 82.2, 81.2, 77.6, 56.0, 55.6, 55.5, 47.1, 46.8, 43.0, 42.6, 40.4, 38.0, 36.0, 35.9, 35.9, 35.4, 35.4, 29.8, 28.6, 28.3, 28.1, 27.8, 24.0, 23.4, 22.5, 18.1, 13.0. HRMS (ESI)  $m/z$  calculated for C<sub>30</sub>H<sub>50</sub>O<sub>5</sub> [M-H]<sup>-</sup> 489.3586; found, 489.3584.

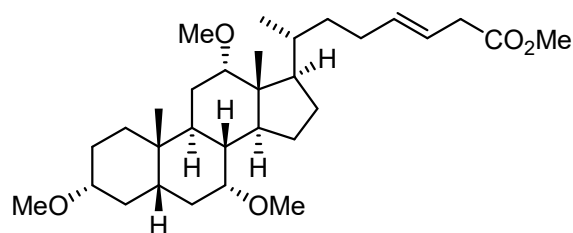

**Compound S3.** Carboxylic acid **S2** (1.70 mmol, 1 equiv) was dissolved in 10 mL of MeOH (0.6 M), 0.1 mL of H<sub>2</sub>SO<sub>4</sub> (1.88 mmol, 1.1 equiv) was added, and the mixture allowed to stir until TLC indicated completion. The reaction was poured into a solution of saturated aqueous NaHCO<sub>3</sub> and extracted with three portions of Et<sub>2</sub>O. The combined organics were then dried over MgSO<sub>4</sub> and concentrated *in vacuo*. The crude material was purified *via* silica column flash chromatography using a 0-20% gradient of EtOAc/Pentanes to yield methyl ester **S3** as clear viscous oil (0.53 g, 65%, 6:1 *trans:cis*). <sup>1</sup>H NMR (500 MHz, C<sub>6</sub>D<sub>6</sub>) δ 5.65 (dt, *J* = 14.6, 6.9 Hz, 1H), 5.45 (dd, *J* = 14.7, 7.3 Hz, 1H), 3.32 (s, 3H), 3.28 (s, 2H), 3.27 (s, 3H), 3.07 (s, 3H), 3.03 (s, 3H), 2.97 (tt, *J* = 11.1, 3.6 Hz, 1H), 2.88 (d, *J* = 6.9 Hz, 2H), 2.48 (dt, *J* = 19.8, 12.6 Hz, 2H), 2.33 (td, *J* = 12.4, 4.1 Hz, 1H), 2.24 – 2.06 (m, 2H), 2.00 – 1.68 (m, 6H), 1.64 (ddt, *J* = 12.3, 9.7, 4.5 Hz, 2H), 1.59 – 1.32 (m, 6H), 1.28 – 1.12 (m, 3H), 1.12 – 1.01 (m, 2H), 0.98 (d, *J* = 6.5 Hz, 3H), 0.87 (s, 3H), 0.65 (s, 3H), <sup>13</sup>C NMR (126 MHz, C<sub>6</sub>D<sub>6</sub>) δ 171.75, 135.2, 122.1, 82.0, 81.0, 77.4, 55.8, 55.4, 55.3, 51.2, 47.0, 46.6, 42.9, 42.4, 40.2, 4.2, 35.9, 35.8, 35.7, 35.2, 29.6, 28.4, 28.1, 29.0, 27.5, 23.7, 23.2, 22.3, 17.9, 12.7. HRMS (ESI) *m/z* calculated for C<sub>31</sub>H<sub>52</sub>O<sub>5</sub> [M+NH<sub>4</sub>]<sup>+</sup> 522.4153; found, 522.4152.

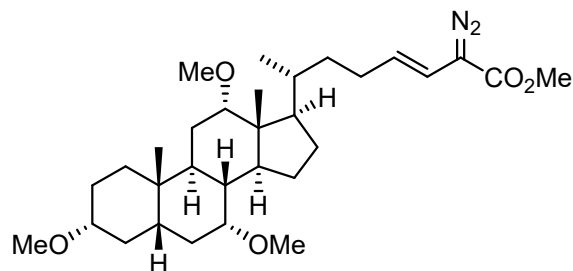

**Compound 11b.** Following the general preparation provided in section IV the reaction to furnish diazoester **11b** was conducted on methyl ester **S3** (1.0 mmol) utilizing 10 equiv of

*p*-ABSA, and 2.6 equiv of DBU. The product was purified by silica gel flash column chromatography (30% Et<sub>2</sub>O/pentane) to yield **11b** as an orange solid (0.200 g, 38%, all *trans*). *Note: if compound was left of vacuum for longer than a period of 1-2 h the sample began to noticeably decompose. For best results, the diazoester compound should be freshly made.* <sup>1</sup>H NMR (500 MHz, C<sub>6</sub>D<sub>6</sub>) δ 5.86 (d, *J* = 15.8 Hz, 1H), 5.21 (dt, *J* = 14.8, 6.9 Hz, 1H), 3.33 (s, 3H), 3.28 (d, *J* = 2.9 Hz, 1H), 3.26 (s, 3H), 3.09 (s, 3H), 3.06 (d, *J* = 4.1 Hz, 1H), 3.04 (s, 3H), 2.97 (tt, *J* = 11.1, 4.1 Hz, 1H), 2.56 – 2.41 (m, 3H), 2.33 (td, *J* = 12.3, 4.4 Hz, 1H), 2.21 – 2.10 (m, 2H), 2.05 – 1.93 (m, 1H), 1.90 – 1.70 (m, 6H), 1.65 (m, 3H), 1.57 – 1.34 (m, 5H), 1.30 – 1.17 (m, 2H), 1.18 – 1.02 (m, 2H), 0.98 (d, *J* = 6.5 Hz, 3H), 0.97 – 0.88 (m, 1H), 0.87 (s, 3H) 0.64 (s, 3H). <sup>13</sup>C NMR (126 MHz, C<sub>6</sub>D<sub>6</sub>) δ 165.4, 129.7, 126.6, 112.0, 82.0, 81.0, 77.4, 55.0, 55.4, 55.3, 51.5, 46.8, 46.6, 42.9, 42.4, 40.2, 36.2, 35.8, 35.7, 35.2, 30.0, 28.4, 28.1, 28.0, 27.5, 23.7, 23.2, 22.3, 18.0, 12.70. HRMS (ESI) *m/z* calculated for C<sub>31</sub>H<sub>50</sub>N<sub>2</sub>O<sub>5</sub> [M+NH<sub>4</sub>]<sup>+</sup>; 548.4058 found, 548.4053.

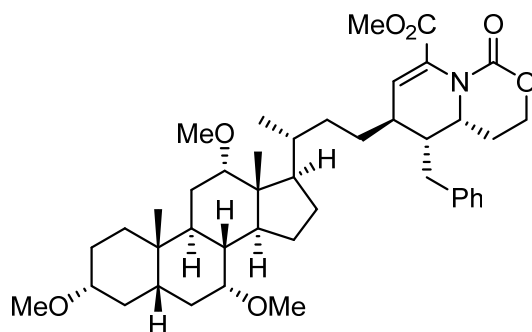

**Compound 12b.** The general procedure was followed, utilizing (*S,R*)-**2a** as the substrate. The carbene transfer to furnish **12b** was conducted on 0.12 mmol scale. The product was purified by silica gel flash chromatography (0 to 50% EtOAc/Hexanes, 10% increments) to yield **12b** as a white solid (44.0 mg, 52% yield, >19:1 *dr*). <sup>1</sup>H NMR (500 MHz, CD<sub>3</sub>CN) δ 7.29 – 7.16 (m, 3H), 7.16 – 7.05 (m, 2H), 5.91 (dd, *J* = 4.5, 1.3 Hz, 1H), 4.37 – 4.11 (m, 2H), 3.77 (td, *J* = 9.0, 8.1, 1.5 Hz, 1H), 3.62 (s, 3H), 3.24 (t, *J* = 2.8 Hz, 1H), 3.17 (s, 3H), 3.12 (s, 3H), 3.12 (s, 3H), 3.06 (q, *J* = 3.1 Hz, 1H), 2.91 – 2.84 (m, 1H), 2.83 – 2.79 (m, 1H), 2.78 – 2.72 (m, 1H), 2.46 – 2.36 (m, 1H), 2.17 (dddd, *J* = 15.2, 8.7, 5.1, 2.6 Hz, 1H), 1.92 – 1.80 (m, 8H), 1.76 – 1.48 (m, 6H), 1.45 – 1.32 (m, 3H), 1.28 –

0.83 (m, 8H), 0.82 – 0.81 (m, 1H), 0.80 (s, 3H), 0.69 (d,  $J = 6.6$  Hz, 3H), 0.52 (s, 3H).  $^{13}\text{C}$  NMR (126 MHz,  $\text{CD}_3\text{CN}$ )  $\delta$  165.2, 153.6, 140.8, 131.9, 130.2, 129.6, 129.3, 125.4, 82.8, 81.1, 78.2, 69.3, 66.0, 56.1, 56.0, 55.5, 54.0, 52.6, 47.5, 46.8, 43.4, 43.3, 42.6, 40.3, 37.4, 36.3, 35.8, 35.5, 33.8, 33.2, 32.9, 31.7, 28.6, 28.5, 28.1, 27.7, 26.3, 23.8, 23.1, 22.6, 20.0, 18.1, 12.7. HRMS (ESI)  $m/z$  calculated for  $\text{C}_{43}\text{H}_{67}\text{N}_2\text{O}_7$   $[\text{M}+\text{NH}_4]^+$  723.4943; found, 723.4945.

### One-pot nitrene-carbene transfer reaction

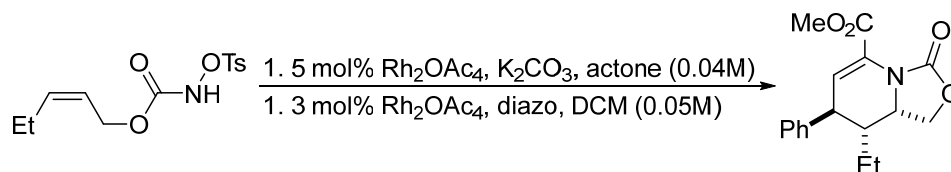

A flame-dried, round bottom flask was placed under nitrogen and charged with  $\text{Rh}_2\text{OAc}_4$  (4.20 mg, 0.01 mmol, 0.05 equiv), *N*-tosyl carbamate (50.00 mg, 0.17 mmol, 1 equiv),  $\text{K}_2\text{CO}_3$  (0.184 g, 1.17 mmol, 7 equiv) and acetone (4.2 mL, 0.04 M).<sup>3</sup> The mixture was stirred vigorously at room temperature for 16 h (TLC was used to determine when the reaction was complete). Once the starting material was consumed, the reaction mixture was passed through a plug of celite to remove  $\text{K}_2\text{CO}_3$ . The filter pad was washed with EtOAc and the volatiles removed under reduced pressure. The resulting oil was diluted with  $\text{CH}_2\text{Cl}_2$  (3.5 mL, 0.05 M) and  $\text{Rh}_2\text{OAc}_4$  (2.2 mg, 0.01 mmol, 0.03 equiv). To this mixture was added a solution of the diazoester compound (40.5 mg, 0.20 mmol, 1.2 equiv) dropwise over 2 h using a syringe pump. The conversion was checked by TLC and NMR after the addition was finished; once the reaction was complete, it was concentrated and loaded directly onto silica for column chromatography (0% to 40% ethyl acetate/hexanes).

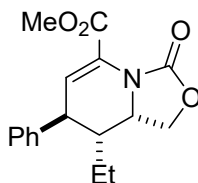

**Compound 4ja.** Following the general procedure, the nitrene and carbene transfer to furnish **4ja** was conducted on 0.17 mmol scale. The product was purified by silica gel flash column chromatography (0 to 40% EtOAc/Hexanes, 10% increments) to yield **4ja** as a white solid (53.6 mg, 54% yield, >19:1 *dr*). <sup>1</sup>H NMR (500 MHz, CDCl<sub>3</sub>) δ 7.36 (d, *J* = 7.3 Hz, 2H), 7.28 (d, *J* = 7.3 Hz, 1H), 7.15 – 7.10 (m, 2H), 6.24 (dd, *J* = 4.9, 1.1 Hz, 1H), 4.49 (t, *J* = 8.8 Hz, 1H), 4.16 (dd, *J* = 9.2, 2.5 Hz, 1H), 3.90 (s, 3H), 3.90 – 3.85 (m, 1H), 3.65 (d, *J* = 5.0 Hz, 1H), 1.70 – 1.57 (m, 3H), 1.17 (t, *J* = 3.8 Hz, 3H). <sup>13</sup>C NMR (126 MHz, CDCl<sub>3</sub>) δ 163.2, 155.1, 142.5, 130.3, 129.0, 128.4, 127.3, 121.6, 65.4, 52.8, 51.7, 46.1, 41.5, 18.9, 12.3. HRMS (ESI) *m/z* calculated for C<sub>17</sub>H<sub>20</sub>NO<sub>4</sub> [M+H]<sup>+</sup> 302.1387; found, 302.1384.

#### X-Crystallographic information for 4cc.

A colorless crystal with approximate dimensions 0.20 x 0.15 x 0.11 mm<sup>3</sup> was selected under oil under ambient conditions and attached to the tip of a MiTeGen MicroMount®. The crystal was mounted in a stream of cold nitrogen at 100(1) K and centered in the X-ray beam by using a video camera.

The crystal evaluation and data collection were performed on a Bruker SMART APEXII diffractometer with Cu K<sub>α</sub> (λ = 1.54178 Å) radiation and the diffractometer to crystal distance of 4.03 cm.<sup>11</sup>

The initial cell constants were obtained from three series of ω scans at different starting angles. Each series consisted of 41 frames collected at intervals of 0.6° in a 25° range about ω with the exposure time of 10 seconds per frame. The reflections were successfully indexed by an automated indexing routine built in the APEX3 program. The final cell constants were calculated from a set of 9913 strong reflections from the actual data collection.

The data were collected by using the full sphere data collection routine to survey the reciprocal space to the extent of a full sphere to a resolution of 0.81 Å. A total of 24327 data were harvested by collecting 14 sets of frames with 0.5° scans in ω and φ with an exposure time 10 sec per frame. These highly redundant datasets were corrected for Lorentz and polarization effects. The absorption correction was based on fitting a

function to the empirical transmission surface as sampled by multiple equivalent measurements.<sup>12</sup> The crystallographic data for this compound were deposited with CDCC with the deposition number 1921208.

### Structure Solution and Refinement

The systematic absences in the diffraction data were consistent for the space groups  $P\bar{1}$  and  $P1$ . The  $E$ -statistics strongly suggested the centrosymmetric space group  $P\bar{1}$  that yielded chemically reasonable and computationally stable results of refinement.<sup>13-18</sup>

A successful solution by the direct methods provided most non-hydrogen atoms from the  $E$ -map. The remaining non-hydrogen atoms were located in an alternating series of least-squares cycles and difference Fourier maps. All non-hydrogen atoms were refined with anisotropic displacement coefficients. All hydrogen atoms were included in the structure factor calculation at idealized positions and were allowed to ride on the neighboring atoms with relative isotropic displacement coefficients.

There are two organic molecules per asymmetric unit. These molecules each have three chiral centers and are enantiomers of each other, therefore the second molecule was labeled with the suffix "A". The chiral centers are C3 - *S*, C4 - *S*, and C5 - *R* for the first molecule, and C3A-*R*, C4A - *R*, and C5A - *S* for the second.

The final least-squares refinement of 437 parameters against 6575 data resulted in residuals  $R$  (based on  $F^2$  for  $I \geq 2\sigma$ ) and  $wR$  (based on  $F^2$  for all data) of 0.0249 and 0.0659, respectively. The final difference Fourier map was featureless.

**Crystal Data** for  $C_{18}H_{20}BrNO_4$  ( $M=394.26$  g/mol): triclinic, space group  $P\bar{1}$  (no. 2),  $a = 7.2645(4)$  Å,  $b = 15.1045(15)$  Å,  $c = 17.5158(14)$  Å,  $\alpha = 65.499(5)^\circ$ ,  $\beta = 84.097(5)^\circ$ ,  $\gamma = 82.736(4)^\circ$ ,  $V = 1732.1(2)$  Å<sup>3</sup>,  $Z = 4$ ,  $T = 100.02$  K,  $\mu(\text{CuK}\alpha) = 3.422$  mm<sup>-1</sup>,  $D_{\text{calc}} = 1.512$  g/cm<sup>3</sup>, 24314 reflections measured ( $5.554^\circ \leq 2\theta \leq 144.264^\circ$ ), 6575 unique ( $R_{\text{int}} = 0.0222$ ,  $R_{\text{sigma}} = 0.0190$ ) which were used in all calculations. The final  $R_1$  was 0.0249 ( $I > 2\sigma(I)$ ) and  $wR_2$  was 0.0659 (all data).

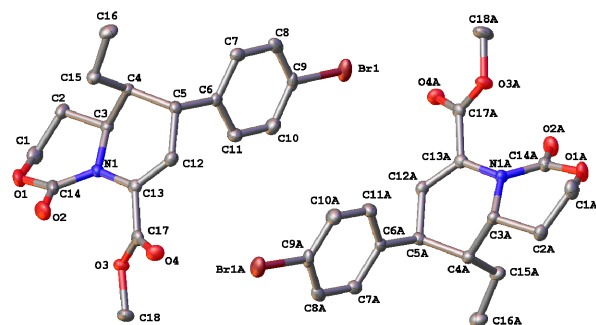

**Supplementary Figure 6.** A molecular drawing of **4cc** shown with 50% probability ellipsoids. All H atoms are omitted.

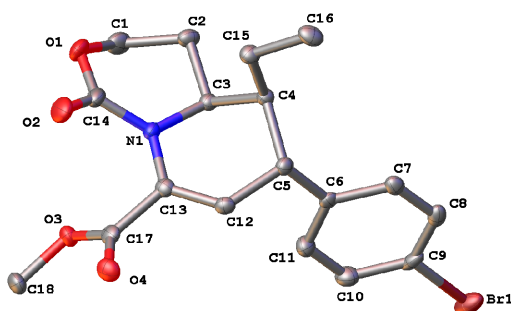

**Supplementary Figure 7.** A molecular drawing of one organic molecule from **4cc** shown with 50% ellipsoids. The other molecule and all hydrogen atoms are omitted.

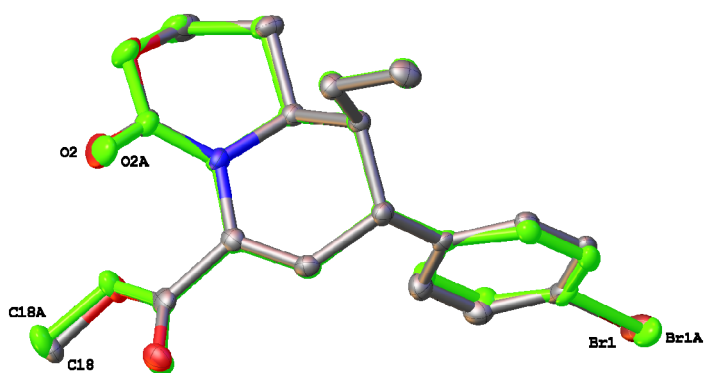

**Supplementary Figure 8.** A molecular drawing of the overlay of the two molecules from **4cc** shown with 50% ellipsoids. The molecule with suffix “A” was inverted and drawn in green.

**Supplementary Table 1.** Crystal data and structure refinement for **4cc**.

|                                                |                                                                |
|------------------------------------------------|----------------------------------------------------------------|
| Identification code                            | <b>4cc</b>                                                     |
| Empirical formula                              | C <sub>18</sub> H <sub>20</sub> BrNO <sub>4</sub>              |
| Formula weight                                 | 394.26                                                         |
| Temperature/K                                  | 100.02                                                         |
| Crystal system                                 | triclinic                                                      |
| Space group                                    | $P\bar{1}$                                                     |
| a/Å                                            | 7.2645(4)                                                      |
| b/Å                                            | 15.1045(15)                                                    |
| c/Å                                            | 17.5158(14)                                                    |
| $\alpha/^\circ$                                | 65.499(5)                                                      |
| $\beta/^\circ$                                 | 84.097(5)                                                      |
| $\gamma/^\circ$                                | 82.736(4)                                                      |
| Volume/Å <sup>3</sup>                          | 1732.1(2)                                                      |
| Z                                              | 4                                                              |
| $\rho_{\text{calc}}/\text{cm}^3$               | 1.512                                                          |
| $\mu/\text{mm}^{-1}$                           | 3.422                                                          |
| F(000)                                         | 808.0                                                          |
| Crystal size/mm <sup>3</sup>                   | 0.203 × 0.154 × 0.108                                          |
| Radiation                                      | CuK $\alpha$ ( $\lambda$ = 1.54178)                            |
| 2 $\theta$ range for data collection/ $^\circ$ | 5.554 to 144.264                                               |
| Index ranges                                   | -8 ≤ h ≤ 8, -18 ≤ k ≤ 18, -21 ≤ l ≤ 20                         |
| Reflections collected                          | 24314                                                          |
| Independent reflections                        | 6575 [ $R_{\text{int}}$ = 0.0222, $R_{\text{sigma}}$ = 0.0190] |
| Data/restraints/parameters                     | 6575/0/437                                                     |
| Goodness-of-fit on F <sup>2</sup>              | 1.021                                                          |
| Final R indexes [ $I \geq 2\sigma(I)$ ]        | $R_1$ = 0.0249, $wR_2$ = 0.0643                                |
| Final R indexes [all data]                     | $R_1$ = 0.0273, $wR_2$ = 0.0659                                |
| Largest diff. peak/hole / e Å <sup>-3</sup>    | 0.43/-0.48                                                     |

**Supplementary Table 2.** Fractional Atomic Coordinates ( $\times 10^4$ ) and Equivalent Isotropic Displacement Parameters (Å<sup>2</sup> $\times 10^3$ ) for **4cc**.  $U_{\text{eq}}$  is defined as 1/3 of the trace of the orthogonalised  $U_{ij}$  tensor.

| Atom | x          | y          | z         | U(eq)    |
|------|------------|------------|-----------|----------|
| Br1  | 9180.5(2)  | 7210.2(2)  | 3815.2(2) | 31.44(7) |
| O1   | 4946.8(19) | 3932.8(9)  | 9846.0(8) | 30.2(3)  |
| O2   | 2007.7(19) | 4038.4(10) | 9558.1(8) | 32.6(3)  |

|      |             |             |            |          |
|------|-------------|-------------|------------|----------|
| O3   | 1629.4(15)  | 6100.0(8)   | 8450.2(7)  | 20.3(2)  |
| O4   | -379.0(15)  | 5671.9(9)   | 7795.9(8)  | 23.6(2)  |
| N1   | 4161.7(18)  | 4562.9(9)   | 8462.8(8)  | 15.9(3)  |
| C1   | 6790(3)     | 4214.5(14)  | 9488.7(12) | 28.5(4)  |
| C2   | 7341(2)     | 3818.3(11)  | 8830.1(10) | 19.5(3)  |
| C3   | 6022(2)     | 4326.4(10)  | 8117.3(9)  | 14.8(3)  |
| C4   | 5798(2)     | 3744.1(10)  | 7595.1(9)  | 14.6(3)  |
| C5   | 4599(2)     | 4395.7(11)  | 6844.7(10) | 15.6(3)  |
| C6   | 5718(2)     | 5096.4(11)  | 6110.5(9)  | 15.3(3)  |
| C7   | 6793(2)     | 4754.8(12)  | 5562.9(10) | 18.3(3)  |
| C8   | 7821(2)     | 5370.2(13)  | 4879.3(10) | 20.5(3)  |
| C9   | 7790(2)     | 6343.3(12)  | 4748.5(10) | 21.4(3)  |
| C10  | 6753(2)     | 6703.9(12)  | 5281.3(11) | 24.1(3)  |
| C11  | 5711(2)     | 6080.7(12)  | 5956.7(11) | 21.4(3)  |
| C12  | 2954(2)     | 4916.6(11)  | 7130.5(10) | 16.3(3)  |
| C13  | 2762(2)     | 4961.2(11)  | 7878.7(10) | 16.1(3)  |
| C14  | 3608(3)     | 4161.8(12)  | 9302.0(10) | 23.0(3)  |
| C15  | 4937(2)     | 2775.4(11)  | 8111.7(10) | 18.1(3)  |
| C16  | 5174(2)     | 2088.5(12)  | 7660.7(11) | 22.7(3)  |
| C17  | 1140(2)     | 5586.8(11)  | 8049.4(10) | 18.2(3)  |
| C18  | 158(2)      | 6769.9(12)  | 8588.1(11) | 23.9(3)  |
| Br1A | 473.8(2)    | 7575.1(2)   | 6100.8(2)  | 29.44(6) |
| O1A  | 5567.6(17)  | 11359.3(9)  | 157.8(7)   | 26.3(3)  |
| O2A  | 8357.2(16)  | 11257.7(9)  | 608.3(8)   | 27.2(3)  |
| O3A  | 8705.3(15)  | 9150.7(9)   | 1472.8(7)  | 22.2(2)  |
| O4A  | 10433.5(15) | 9341.1(9)   | 2379.6(8)  | 22.4(2)  |
| N1A  | 6034.0(17)  | 10544.1(9)  | 1573.4(8)  | 15.2(3)  |
| C1A  | 3710(2)     | 11034.1(14) | 397.9(11)  | 25.5(4)  |
| C2A  | 2907(2)     | 11291.0(12) | 1115.7(10) | 19.9(3)  |
| C3A  | 4092(2)     | 10723.6(11) | 1872.1(9)  | 14.7(3)  |
| C4A  | 4117(2)     | 11224.1(11) | 2478.6(10) | 15.0(3)  |
| C5A  | 5210(2)     | 10523.5(11) | 3250.8(10) | 15.6(3)  |
| C6A  | 4029(2)     | 9796.7(11)  | 3933.4(10) | 15.5(3)  |
| C7A  | 3065(2)     | 10052.1(12) | 4556.7(10) | 18.1(3)  |
| C8A  | 2005(2)     | 9398.9(12)  | 5200.6(10) | 20.1(3)  |
| C9A  | 1886(2)     | 8486.6(12)  | 5212.9(10) | 20.5(3)  |
| C10A | 2800(2)     | 8216.6(12)  | 4598.3(11) | 23.6(3)  |
| C11A | 3877(2)     | 8871.0(12)  | 3966.3(10) | 20.9(3)  |

|      |          |             |            |         |
|------|----------|-------------|------------|---------|
| C12A | 6926(2)  | 10025.4(11) | 2987.6(10) | 16.1(3) |
| C13A | 7304(2)  | 10074.8(11) | 2210.6(10) | 15.2(3) |
| C14A | 6753(2)  | 11073.6(12) | 776.0(10)  | 19.8(3) |
| C15A | 4970(2)  | 12210.3(11) | 2061.5(10) | 19.1(3) |
| C16A | 4586(2)  | 12812.5(12) | 2589.5(11) | 22.9(3) |
| C17A | 9007(2)  | 9502.2(11)  | 2032.2(10) | 17.0(3) |
| C18A | 10271(3) | 8570.5(15)  | 1279.2(12) | 31.4(4) |

**Supplementary Table 3.** Anisotropic Displacement Parameters ( $\text{\AA}^2 \times 10^3$ ) for **4cc**. The Anisotropic displacement factor exponent takes the form:  $2\pi^2[h^2a^{*2}U_{11}+2hka^*b^*U_{12}+\dots]$ .

| Atom | $U_{11}$  | $U_{22}$  | $U_{33}$  | $U_{23}$ | $U_{13}$ | $U_{12}$ |
|------|-----------|-----------|-----------|----------|----------|----------|
| Br1  | 20.46(10) | 36.89(11) | 20.84(11) | 3.93(8)  | 0.54(7)  | -2.80(7) |
| O1   | 42.3(8)   | 32.2(7)   | 12.7(6)   | -8.2(5)  | -4.7(5)  | 7.3(6)   |
| O2   | 35.5(7)   | 31.8(7)   | 20.0(7)   | -3.4(5)  | 10.3(5)  | -1.5(5)  |
| O3   | 19.6(6)   | 21.6(5)   | 20.3(6)   | -11.0(5) | 0.7(4)   | 3.3(4)   |
| O4   | 16.3(6)   | 25.1(6)   | 27.9(7)   | -10.0(5) | 1.5(5)   | -1.6(4)  |
| N1   | 19.8(7)   | 14.7(6)   | 12.5(7)   | -5.3(5)  | -0.6(5)  | 0.0(5)   |
| C1   | 37.5(10)  | 28.8(9)   | 22.5(10)  | -13.2(8) | -13.0(7) | 4.2(7)   |
| C2   | 24.3(8)   | 16.6(7)   | 18.4(8)   | -7.2(6)  | -8.1(6)  | 1.3(6)   |
| C3   | 17.3(7)   | 12.7(7)   | 14.3(8)   | -5.4(6)  | -1.7(6)  | -0.5(5)  |
| C4   | 16.3(7)   | 13.4(7)   | 14.0(8)   | -5.7(6)  | -1.3(6)  | -0.3(5)  |
| C5   | 18.0(7)   | 15.8(7)   | 13.7(8)   | -6.8(6)  | -1.9(6)  | -1.1(6)  |
| C6   | 16.8(7)   | 17.1(7)   | 11.4(8)   | -5.0(6)  | -4.9(6)  | 0.7(6)   |
| C7   | 17.1(8)   | 20.6(7)   | 19.4(9)   | -10.5(7) | -5.3(6)  | 2.5(6)   |
| C8   | 14.4(7)   | 32.0(9)   | 16.1(8)   | -11.5(7) | -3.1(6)  | 1.9(6)   |
| C9   | 16.2(8)   | 27.3(8)   | 11.5(8)   | 1.5(6)   | -2.1(6)  | -1.8(6)  |
| C10  | 26.4(9)   | 18.2(8)   | 23.4(9)   | -4.6(7)  | -1.7(7)  | -0.7(6)  |
| C11  | 26.2(8)   | 19.2(8)   | 19.4(9)   | -9.5(7)  | 0.1(6)   | 0.2(6)   |
| C12  | 14.9(7)   | 16.1(7)   | 16.6(8)   | -4.9(6)  | -3.0(6)  | -0.9(6)  |
| C13  | 16.4(7)   | 13.8(7)   | 16.4(8)   | -4.3(6)  | 0.6(6)   | -3.1(6)  |
| C14  | 35.1(10)  | 16.5(7)   | 13.5(8)   | -4.1(6)  | 0.2(7)   | 2.8(7)   |
| C15  | 21.4(8)   | 14.6(7)   | 18.4(8)   | -6.6(6)  | -1.8(6)  | -2.1(6)  |
| C16  | 24.1(8)   | 16.3(7)   | 30.9(10)  | -12.3(7) | -6.2(7)  | 0.4(6)   |
| C17  | 19.7(8)   | 16.5(7)   | 13.8(8)   | -2.2(6)  | 3.7(6)   | -3.2(6)  |
| C18  | 22.9(8)   | 25.0(8)   | 22.1(9)   | -11.2(7) | 2.5(6)   | 6.5(7)   |
| Br1A | 24.27(10) | 29.54(10) | 21.57(11) | 1.44(8)  | 4.20(7)  | -3.43(7) |

|      |         |          |          |          |         |         |
|------|---------|----------|----------|----------|---------|---------|
| O1A  | 24.9(6) | 33.7(7)  | 13.3(6)  | -2.9(5)  | -2.0(5) | -1.3(5) |
| O2A  | 20.9(6) | 33.7(7)  | 19.8(6)  | -4.2(5)  | 4.3(5)  | -5.3(5) |
| O3A  | 18.5(6) | 29.1(6)  | 22.8(6)  | -16.1(5) | -1.6(4) | 4.7(5)  |
| O4A  | 14.4(5) | 27.6(6)  | 24.5(6)  | -10.5(5) | -2.0(4) | 0.9(4)  |
| N1A  | 14.2(6) | 16.7(6)  | 13.4(7)  | -5.1(5)  | -1.3(5) | -0.2(5) |
| C1A  | 25.0(9) | 31.8(9)  | 18.1(9)  | -7.3(7)  | -6.6(7) | -2.6(7) |
| C2A  | 18.3(8) | 20.4(7)  | 18.5(9)  | -5.0(7)  | -5.3(6) | 0.0(6)  |
| C3A  | 12.7(7) | 15.0(7)  | 14.8(8)  | -4.7(6)  | -0.6(6) | -1.0(5) |
| C4A  | 15.0(7) | 13.7(7)  | 15.2(8)  | -5.0(6)  | 0.3(6)  | -1.0(5) |
| C5A  | 16.9(7) | 16.1(7)  | 15.3(8)  | -8.2(6)  | -0.6(6) | -1.3(6) |
| C6A  | 16.8(7) | 16.5(7)  | 12.5(8)  | -5.3(6)  | -4.1(6) | 1.8(6)  |
| C7A  | 16.7(7) | 20.7(7)  | 18.9(8)  | -10.5(7) | -3.5(6) | 1.5(6)  |
| C8A  | 15.8(8) | 29.7(8)  | 15.2(8)  | -10.4(7) | -1.9(6) | 2.6(6)  |
| C9A  | 16.8(7) | 24.3(8)  | 12.3(8)  | 0.5(6)   | 0.0(6)  | -2.4(6) |
| C10A | 28.9(9) | 17.4(7)  | 22.4(9)  | -6.2(7)  | 0.5(7)  | -2.6(6) |
| C11A | 28.0(9) | 18.8(7)  | 16.8(8)  | -9.1(7)  | 1.4(6)  | -1.2(6) |
| C12A | 15.3(7) | 15.9(7)  | 16.4(8)  | -5.4(6)  | -3.3(6) | -1.2(6) |
| C13A | 14.6(7) | 14.0(7)  | 16.5(8)  | -5.2(6)  | -0.7(6) | -2.8(5) |
| C14A | 22.7(8) | 19.7(7)  | 14.5(8)  | -5.3(6)  | -0.5(6) | 0.1(6)  |
| C15A | 20.3(8) | 14.6(7)  | 21.7(9)  | -6.8(6)  | 1.4(6)  | -3.1(6) |
| C16A | 24.0(8) | 17.2(7)  | 28.8(9)  | -11.0(7) | 0.0(7)  | -2.5(6) |
| C17A | 16.7(8) | 16.5(7)  | 14.9(8)  | -3.8(6)  | 2.0(6)  | -2.7(6) |
| C18A | 25.0(9) | 43.3(11) | 31.6(11) | -24.8(9) | -1.2(7) | 10.2(8) |

**Supplementary Table 4.** Bond Lengths for 4cc.

| Atom | Atom | Length/Å   | Atom | Atom | Length/Å   |
|------|------|------------|------|------|------------|
| Br1  | C9   | 1.9044(16) | Br1A | C9A  | 1.9026(16) |
| O1   | C1   | 1.455(2)   | O1A  | C1A  | 1.456(2)   |
| O1   | C14  | 1.344(2)   | O1A  | C14A | 1.345(2)   |
| O2   | C14  | 1.211(2)   | O2A  | C14A | 1.211(2)   |
| O3   | C17  | 1.339(2)   | O3A  | C17A | 1.3397(19) |
| O3   | C18  | 1.4493(18) | O3A  | C18A | 1.4460(19) |
| O4   | C17  | 1.204(2)   | O4A  | C17A | 1.203(2)   |
| N1   | C3   | 1.4865(19) | N1A  | C3A  | 1.4857(19) |
| N1   | C13  | 1.411(2)   | N1A  | C13A | 1.411(2)   |
| N1   | C14  | 1.375(2)   | N1A  | C14A | 1.376(2)   |

|     |     |            |      |      |          |
|-----|-----|------------|------|------|----------|
| C1  | C2  | 1.505(2)   | C1A  | C2A  | 1.506(2) |
| C2  | C3  | 1.527(2)   | C2A  | C3A  | 1.529(2) |
| C3  | C4  | 1.5397(19) | C3A  | C4A  | 1.541(2) |
| C4  | C5  | 1.550(2)   | C4A  | C5A  | 1.549(2) |
| C4  | C15 | 1.539(2)   | C4A  | C15A | 1.541(2) |
| C5  | C6  | 1.520(2)   | C5A  | C6A  | 1.520(2) |
| C5  | C12 | 1.504(2)   | C5A  | C12A | 1.505(2) |
| C6  | C7  | 1.397(2)   | C6A  | C7A  | 1.398(2) |
| C6  | C11 | 1.396(2)   | C6A  | C11A | 1.393(2) |
| C7  | C8  | 1.387(2)   | C7A  | C8A  | 1.389(2) |
| C8  | C9  | 1.388(2)   | C8A  | C9A  | 1.383(2) |
| C9  | C10 | 1.382(2)   | C9A  | C10A | 1.384(2) |
| C10 | C11 | 1.389(2)   | C10A | C11A | 1.388(2) |
| C12 | C13 | 1.332(2)   | C12A | C13A | 1.333(2) |
| C13 | C17 | 1.500(2)   | C13A | C17A | 1.500(2) |
| C15 | C16 | 1.529(2)   | C15A | C16A | 1.530(2) |

**Supplementary Table 5.** Bond Angles for 4cc.

| Atom | Atom | Atom | Angle/°    | Atom | Atom | Atom | Angle/°    |
|------|------|------|------------|------|------|------|------------|
| C14  | O1   | C1   | 116.72(13) | C14A | O1A  | C1A  | 116.81(13) |
| C17  | O3   | C18  | 114.96(13) | C17A | O3A  | C18A | 115.05(13) |
| C13  | N1   | C3   | 115.39(12) | C13A | N1A  | C3A  | 115.21(12) |
| C14  | N1   | C3   | 123.84(13) | C14A | N1A  | C3A  | 123.50(13) |
| C14  | N1   | C13  | 117.64(13) | C14A | N1A  | C13A | 117.29(13) |
| O1   | C1   | C2   | 108.38(14) | O1A  | C1A  | C2A  | 108.84(13) |
| C1   | C2   | C3   | 108.09(13) | C1A  | C2A  | C3A  | 108.60(13) |
| N1   | C3   | C2   | 109.59(12) | N1A  | C3A  | C2A  | 109.40(12) |
| N1   | C3   | C4   | 108.98(12) | N1A  | C3A  | C4A  | 108.62(12) |
| C2   | C3   | C4   | 114.87(12) | C2A  | C3A  | C4A  | 114.86(12) |
| C3   | C4   | C5   | 108.70(12) | C3A  | C4A  | C5A  | 108.87(12) |
| C15  | C4   | C3   | 113.10(12) | C3A  | C4A  | C15A | 112.74(12) |
| C15  | C4   | C5   | 110.39(12) | C15A | C4A  | C5A  | 110.17(12) |
| C6   | C5   | C4   | 112.77(12) | C6A  | C5A  | C4A  | 113.53(12) |
| C12  | C5   | C4   | 110.44(12) | C12A | C5A  | C4A  | 111.01(12) |
| C12  | C5   | C6   | 112.15(12) | C12A | C5A  | C6A  | 111.96(12) |
| C7   | C6   | C5   | 119.48(13) | C7A  | C6A  | C5A  | 119.60(13) |

|     |     |     |            |      |      |      |            |
|-----|-----|-----|------------|------|------|------|------------|
| C11 | C6  | C5  | 122.34(14) | C11A | C6A  | C5A  | 122.16(14) |
| C11 | C6  | C7  | 118.18(15) | C11A | C6A  | C7A  | 118.24(15) |
| C8  | C7  | C6  | 121.48(15) | C8A  | C7A  | C6A  | 121.19(14) |
| C7  | C8  | C9  | 118.77(14) | C9A  | C8A  | C7A  | 118.97(14) |
| C8  | C9  | Br1 | 119.94(13) | C8A  | C9A  | Br1A | 119.52(12) |
| C10 | C9  | Br1 | 118.80(13) | C8A  | C9A  | C10A | 121.27(15) |
| C10 | C9  | C8  | 121.25(15) | C10A | C9A  | Br1A | 119.21(13) |
| C9  | C10 | C11 | 119.25(15) | C9A  | C10A | C11A | 119.12(15) |
| C10 | C11 | C6  | 121.05(15) | C10A | C11A | C6A  | 121.20(15) |
| C13 | C12 | C5  | 124.16(14) | C13A | C12A | C5A  | 124.02(14) |
| N1  | C13 | C17 | 118.67(13) | N1A  | C13A | C17A | 118.14(13) |
| C12 | C13 | N1  | 122.20(14) | C12A | C13A | N1A  | 122.02(14) |
| C12 | C13 | C17 | 118.44(14) | C12A | C13A | C17A | 119.31(14) |
| O1  | C14 | N1  | 116.33(15) | O1A  | C14A | N1A  | 115.82(14) |
| O2  | C14 | O1  | 120.18(15) | O2A  | C14A | O1A  | 119.95(15) |
| O2  | C14 | N1  | 123.45(16) | O2A  | C14A | N1A  | 124.18(15) |
| C16 | C15 | C4  | 112.58(13) | C16A | C15A | C4A  | 112.46(13) |
| O3  | C17 | C13 | 111.84(13) | O3A  | C17A | C13A | 111.54(13) |
| O4  | C17 | O3  | 124.29(14) | O4A  | C17A | O3A  | 124.39(14) |
| O4  | C17 | C13 | 123.62(14) | O4A  | C17A | C13A | 123.98(14) |

**Supplementary Table 6.** Torsion Angles for **4cc**.

| A   | B   | C   | D   | Angle/°     | A    | B    | C    | D    | Angle/°     |
|-----|-----|-----|-----|-------------|------|------|------|------|-------------|
| Br1 | C9  | C10 | C11 | 179.03(12)  | Br1A | C9A  | C10A | C11A | -177.94(13) |
| O1  | C1  | C2  | C3  | 65.08(17)   | O1A  | C1A  | C2A  | C3A  | -63.65(17)  |
| N1  | C3  | C4  | C5  | 62.67(15)   | N1A  | C3A  | C4A  | C5A  | -62.53(15)  |
| N1  | C3  | C4  | C15 | -60.29(16)  | N1A  | C3A  | C4A  | C15A | 60.04(16)   |
| N1  | C13 | C17 | O3  | 33.16(19)   | N1A  | C13A | C17A | O3A  | -28.31(18)  |
| N1  | C13 | C17 | O4  | -152.32(15) | N1A  | C13A | C17A | O4A  | 155.02(15)  |
| C1  | O1  | C14 | O2  | -172.58(15) | C1A  | O1A  | C14A | O2A  | 174.46(15)  |
| C1  | O1  | C14 | N1  | 5.4(2)      | C1A  | O1A  | C14A | N1A  | -3.1(2)     |
| C1  | C2  | C3  | N1  | -31.90(17)  | C1A  | C2A  | C3A  | N1A  | 29.20(17)   |
| C1  | C2  | C3  | C4  | -154.95(14) | C1A  | C2A  | C3A  | C4A  | 151.62(13)  |
| C2  | C3  | C4  | C5  | -173.95(13) | C2A  | C3A  | C4A  | C5A  | 174.63(12)  |
| C2  | C3  | C4  | C15 | 63.09(17)   | C2A  | C3A  | C4A  | C15A | -62.81(17)  |
| C3  | N1  | C13 | C12 | 15.2(2)     | C3A  | N1A  | C13A | C12A | -16.7(2)    |

|                            |                                |
|----------------------------|--------------------------------|
| C3 N1 C13 C17 -155.16(13)  | C3A N1A C13A C17A 154.89(13)   |
| C3 N1 C14 O1 31.4(2)       | C3A N1A C14A O1A -35.5(2)      |
| C3 N1 C14 O2 -150.75(15)   | C3A N1A C14A O2A 147.12(16)    |
| C3 C4 C5 C6 82.22(15)      | C3A C4A C5A C6A -85.40(15)     |
| C3 C4 C5 C12 -44.14(16)    | C3A C4A C5A C12A 41.77(16)     |
| C3 C4 C15 C16 -165.30(13)  | C3A C4A C15A C16A 166.54(13)   |
| C4 C5 C6 C7 79.54(17)      | C4A C5A C6A C7A -88.25(16)     |
| C4 C5 C6 C11 -100.75(16)   | C4A C5A C6A C11A 92.25(17)     |
| C4 C5 C12 C13 12.2(2)      | C4A C5A C12A C13A -9.0(2)      |
| C5 C4 C15 C16 72.67(16)    | C5A C4A C15A C16A -71.62(16)   |
| C5 C6 C7 C8 179.30(13)     | C5A C6A C7A C8A -178.58(14)    |
| C5 C6 C11 C10 179.84(15)   | C5A C6A C11A C10A 179.60(15)   |
| C5 C12 C13 N1 3.8(2)       | C5A C12A C13A N1A -5.2(2)      |
| C5 C12 C13 C17 174.16(13)  | C5A C12A C13A C17A -176.63(13) |
| C6 C5 C12 C13 -114.50(16)  | C6A C5A C12A C13A 119.07(16)   |
| C6 C7 C8 C9 0.8(2)         | C6A C7A C8A C9A -1.0(2)        |
| C7 C6 C11 C10 -0.4(2)      | C7A C6A C11A C10A 0.1(2)       |
| C7 C8 C9 Br1 -179.87(11)   | C7A C8A C9A Br1A 178.95(12)    |
| C7 C8 C9 C10 -0.3(2)       | C7A C8A C9A C10A 0.0(2)        |
| C8 C9 C10 C11 -0.5(3)      | C8A C9A C10A C11A 1.0(3)       |
| C9 C10 C11 C6 0.9(3)       | C9A C10A C11A C6A -1.1(3)      |
| C11 C6 C7 C8 -0.4(2)       | C11A C6A C7A C8A 0.9(2)        |
| C12 C5 C6 C7 -155.02(14)   | C12A C5A C6A C7A 145.08(14)    |
| C12 C5 C6 C11 24.7(2)      | C12A C5A C6A C11A -34.4(2)     |
| C12 C13 C17 O3 -137.58(15) | C12A C13A C17A O3A 143.49(14)  |
| C12 C13 C17 O4 36.9(2)     | C12A C13A C17A O4A -33.2(2)    |
| C13 N1 C3 C2 -174.83(12)   | C13A N1A C3A C2A 176.42(12)    |
| C13 N1 C3 C4 -48.35(16)    | C13A N1A C3A C4A 50.34(16)     |
| C13 N1 C14 O1 -169.58(13)  | C13A N1A C14A O1A 168.14(13)   |
| C13 N1 C14 O2 8.3(2)       | C13A N1A C14A O2A -9.3(2)      |
| C14 O1 C1 C2 -53.16(18)    | C14A O1A C1A C2A 51.90(19)     |
| C14 N1 C3 C2 -15.38(19)    | C14A N1A C3A C2A 19.59(19)     |
| C14 N1 C3 C4 111.10(16)    | C14A N1A C3A C4A -106.49(15)   |
| C14 N1 C13 C12 -145.56(15) | C14A N1A C13A C12A 141.66(15)  |
| C14 N1 C13 C17 44.06(19)   | C14A N1A C13A C17A -46.77(18)  |
| C15 C4 C5 C6 -153.20(12)   | C15A C4A C5A C6A 150.50(12)    |
| C15 C4 C5 C12 80.45(15)    | C15A C4A C5A C12A -82.33(15)   |
| C18 O3 C17 O4 1.7(2)       | C18A O3A C17A O4A -2.1(2)      |

C18 O3 C17 C13 176.17(13) C18A O3A C17A C13A -178.72(14)

**Supplementary Table 7.** Hydrogen Atom Coordinates ( $\text{\AA} \times 10^4$ ) and Isotropic Displacement Parameters ( $\text{\AA}^2 \times 10^3$ ) for **4cc**.

| Atom | <i>x</i> | <i>y</i> | <i>z</i> | U(eq) |
|------|----------|----------|----------|-------|
| H1A  | 7694.31  | 3945.88  | 9934.18  | 34    |
| H1B  | 6778.64  | 4935.32  | 9233.16  | 34    |
| H2A  | 7256.98  | 3103.7   | 9074.83  | 23    |
| H2B  | 8638.67  | 3945.22  | 8614.22  | 23    |
| H3   | 6520.46  | 4956.78  | 7728.48  | 18    |
| H4   | 7057.81  | 3590.82  | 7365.83  | 17    |
| H5   | 4099.91  | 3950.08  | 6640.75  | 19    |
| H7   | 6820.13  | 4085.97  | 5660.7   | 22    |
| H8   | 8533.77  | 5130.09  | 4507.54  | 25    |
| H10  | 6751.56  | 7370.32  | 5186.97  | 29    |
| H11  | 4981.9   | 6328.44  | 6319.66  | 26    |
| H12  | 1991.81  | 5233.86  | 6753.53  | 20    |
| H15A | 5528.49  | 2444.7   | 8656.79  | 22    |
| H15B | 3595.97  | 2916.75  | 8229.19  | 22    |
| H16A | 4480.04  | 2383.55  | 7149.07  | 34    |
| H16B | 4698.41  | 1463.56  | 8032.27  | 34    |
| H16C | 6494.16  | 1977.91  | 7511.54  | 34    |
| H18A | -362.55  | 7207.62  | 8050.55  | 36    |
| H18B | 663.15   | 7156.25  | 8835.88  | 36    |
| H18C | -820.49  | 6398.89  | 8970.98  | 36    |
| H1AA | 3769.66  | 10318.84 | 571.25   | 31    |
| H1AB | 2910.46  | 11356.94 | -85.84   | 31    |
| H2AA | 1608.5   | 11117.81 | 1261.01  | 24    |
| H2AB | 2905     | 12001.95 | 952.44   | 24    |
| H3A  | 3589.83  | 10075.52 | 2195.75  | 18    |
| H4A  | 2807.07  | 11344.63 | 2676.95  | 18    |
| H5A  | 5644.95  | 10939.71 | 3503.2   | 19    |
| H7A  | 3137.38  | 10683.73 | 4539.54  | 22    |
| H8A  | 1371.44  | 9576.3   | 5625.93  | 24    |
| H10A | 2690.24  | 7591.4   | 4608.81  | 28    |
| H11A | 4524.02  | 8684.5   | 3548.41  | 25    |
| H12A | 7792.48  | 9652.85  | 3400.38  | 19    |

|      |          |          |         |    |
|------|----------|----------|---------|----|
| H15C | 6330.3   | 12088.65 | 1973.43 | 23 |
| H15D | 4454.12  | 12590.37 | 1503.81 | 23 |
| H16D | 5102.92  | 13443.41 | 2287.79 | 34 |
| H16E | 5167.09  | 12458.8  | 3128    | 34 |
| H16F | 3241.29  | 12921.15 | 2690.8  | 34 |
| H18D | 9972.18  | 8402.48  | 825.27  | 47 |
| H18E | 10540.24 | 7970.33  | 1779.94 | 47 |
| H18F | 11359.84 | 8945.51  | 1101.32 | 47 |

### Computational Methods.

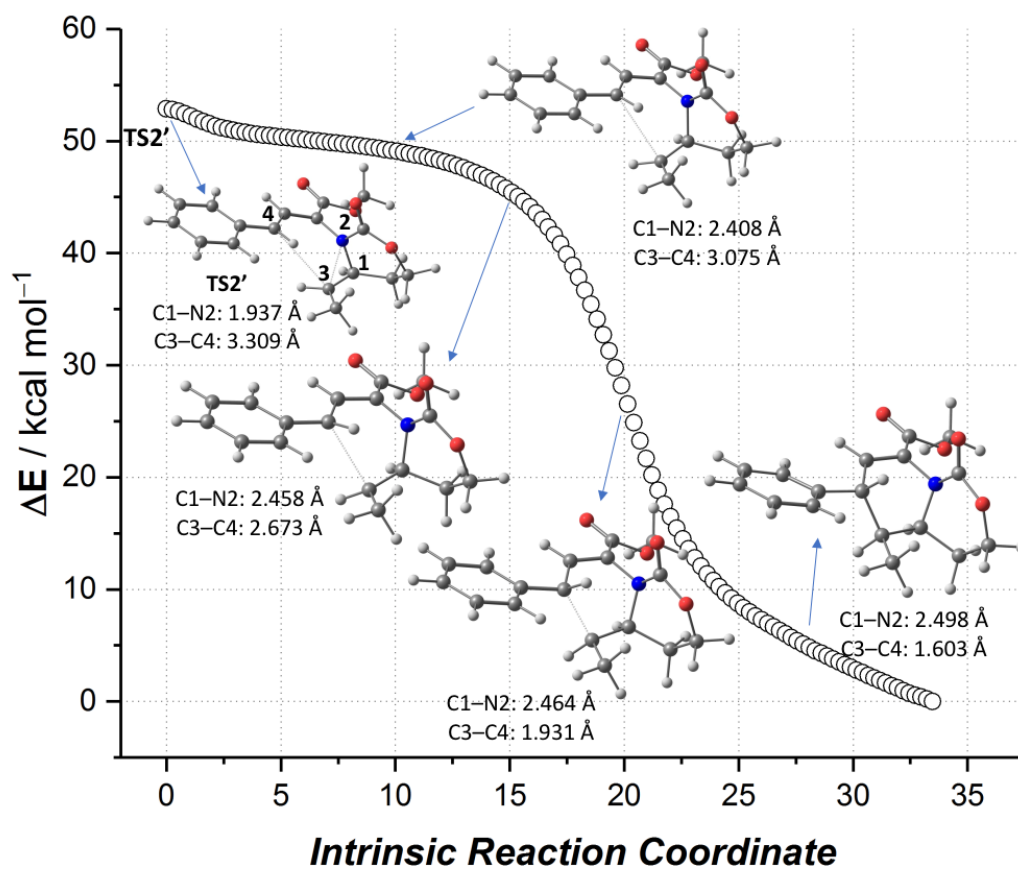

**Supplementary Figure 9.** Computed (SCM( $\text{CH}_2\text{Cl}_2$ )-B3LYP-D3/def2-SVP level) intrinsic reaction coordinate for the transformation of **TS2'** into **4ba**.

## Computational details

All the calculations reported in this paper were performed with the Gaussian 09 suite of programs.<sup>19</sup> Electron correlation was partially taken into account using the hybrid functional usually denoted as B3LYP<sup>20-22</sup> in conjunction with the D3 dispersion correction suggested by Grimme et al.<sup>23</sup> using the standard double- $\zeta$  quality def2-SVP<sup>24</sup> basis set for all atoms. The SMD continuum model was used to model the effects of the solvent (CH<sub>2</sub>Cl<sub>2</sub>). This level is denoted SMD(CH<sub>2</sub>Cl<sub>2</sub>)-B3LYP-D3/def2-SVP. Geometries were fully optimized in solution without any geometry or symmetry constraints. Reactants, intermediates, and products were characterized by frequency calculations,<sup>25</sup> and have positive definite Hessian matrices. Transition structures (TS's) show only one negative eigenvalue in their diagonalized force constant matrices, and their associated eigenvectors were confirmed to correspond to the motion along the reaction coordinate under consideration using the Intrinsic Reaction Coordinate (IRC) method.<sup>26</sup> Frequency calculations were also used to determine the difference between the potential (E) and Gibbs (G) energies,  $G - E$ , which contains the zero-point, thermal, and entropy energies. Potential energies were refined,  $E_{\text{sol}}$ , by means of single point (SP) calculations at the same level with a larger basis set, def2-TZVPP,<sup>24</sup> where all elements were described with a triple- $\zeta$  + polarization quality basis set. This level is denoted SMD(CH<sub>2</sub>Cl<sub>2</sub>)-B3LYP-D3/def2-TZVPP//SMD(CH<sub>2</sub>Cl<sub>2</sub>)-B3LYP-D3/def2-SVP. The  $\Delta G$  and  $\Delta G^\ddagger$  values given in the text were obtained from the Gibbs energy in solution,  $G_{\text{sol}}$ , which was calculated by adding the thermochemistry corrections,  $G - E$ , to the refined SP energies,  $E_{\text{sol}}$ , i.e.,  $G_{\text{sol}} = E_{\text{sol}} + G - E$ . Cartesian coordinates (in Å) and total energies (in a.u.) of all the

stationary points discussed in the text. All calculations have been performed at the SMD(CH<sub>2</sub>Cl<sub>2</sub>)-B3LYP-D3/def2-TZVPP//SMD(CH<sub>2</sub>Cl<sub>2</sub>)-B3LYP-D3/def2-SVP level.

The coordinates for the relevant computed structures can be found in the Supplementary Data File.

Supplementary Figures.

Supplementary Figure 10.  $^1\text{H}$  NMR (500 MHz,  $\text{CDCl}_3$ ) for precursor to compound **2a**

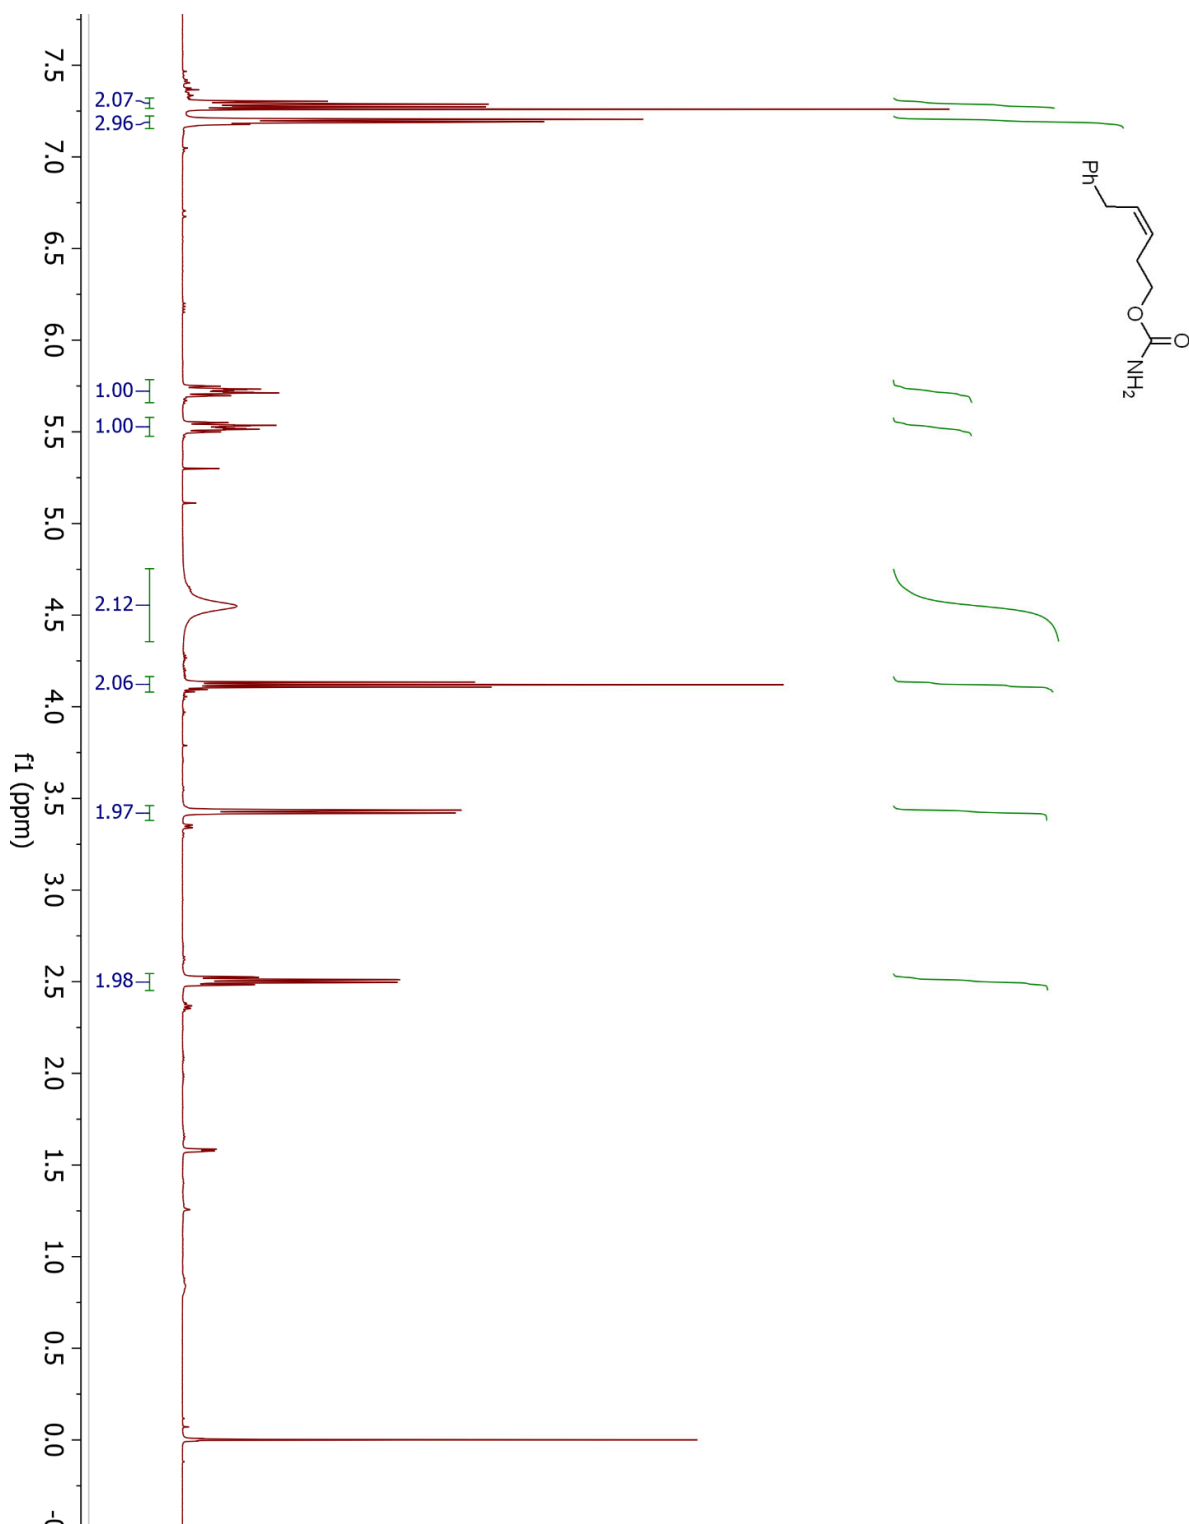

**Supplementary Figure 11.**  $^{13}\text{C}$  NMR (126 MHz,  $\text{CDCl}_3$ ) for precursor to compound **2a**

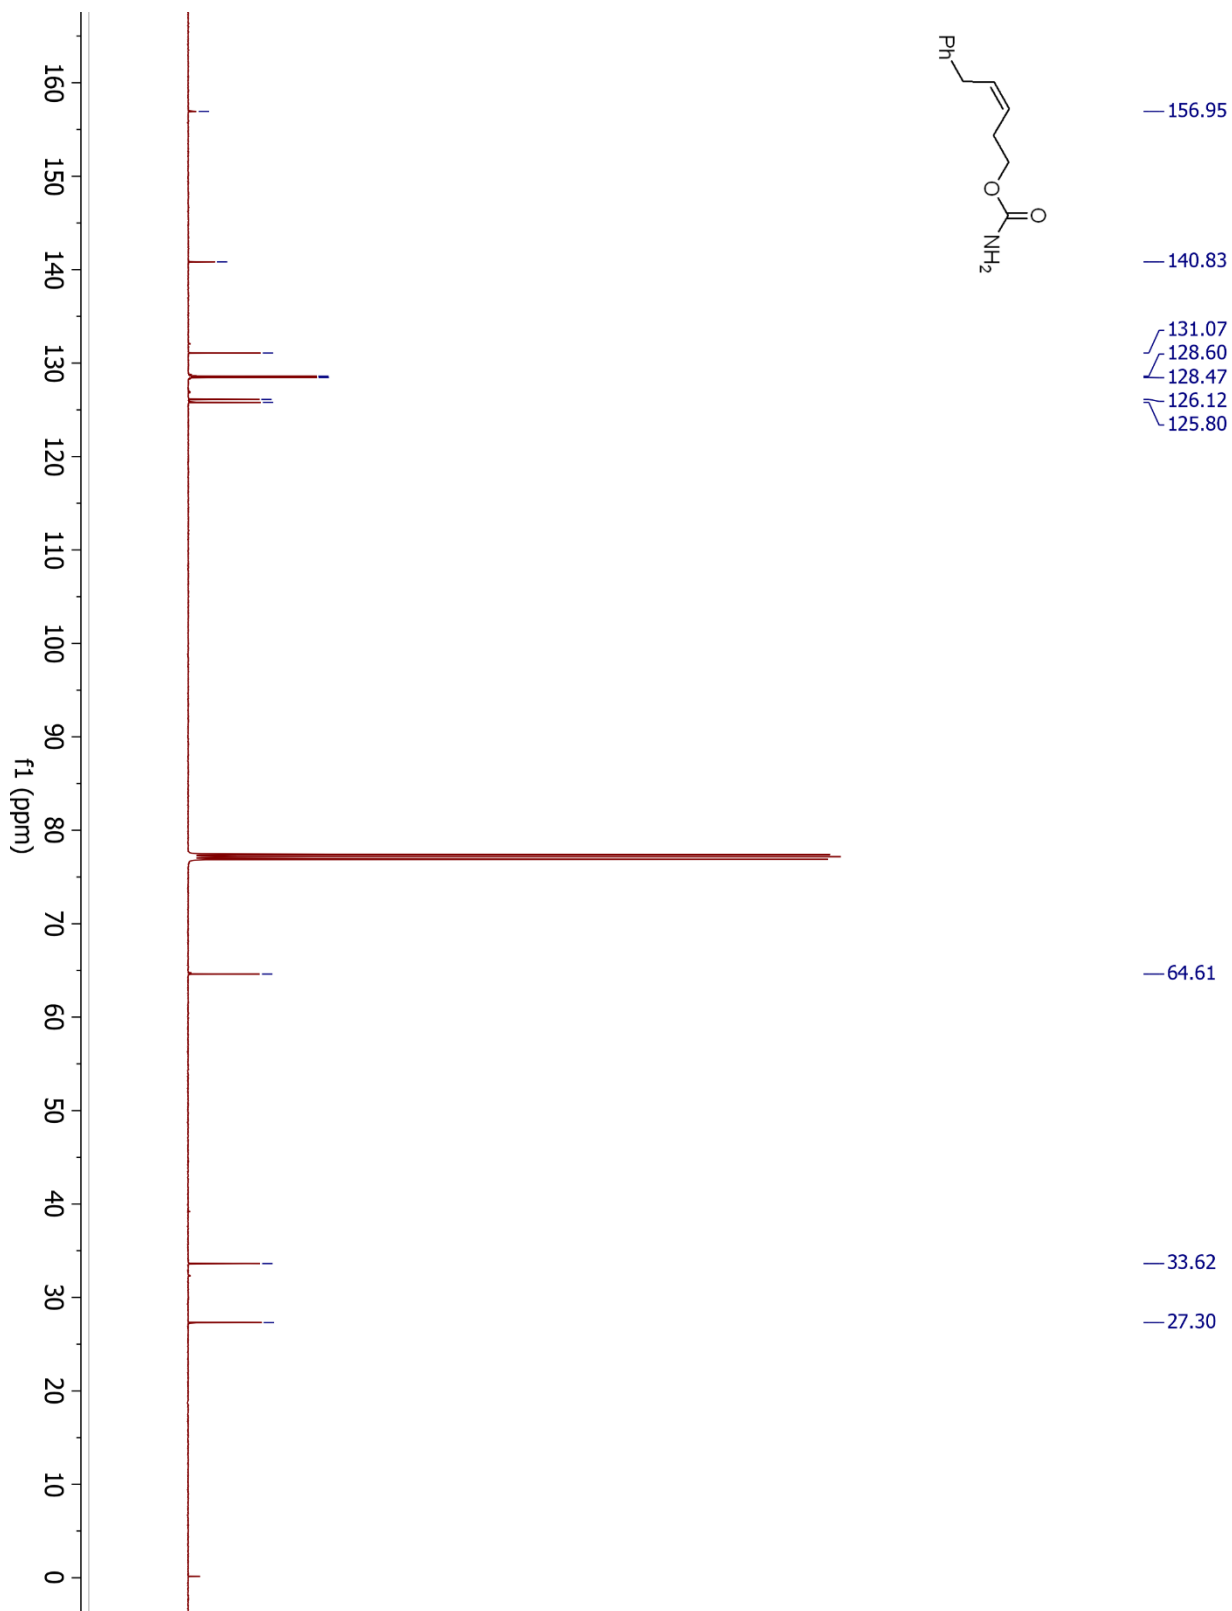

**Supplementary Figure 12.**  $^1\text{H}$  NMR (500 MHz,  $\text{CDCl}_3$ ) for precursor to compound **2b**

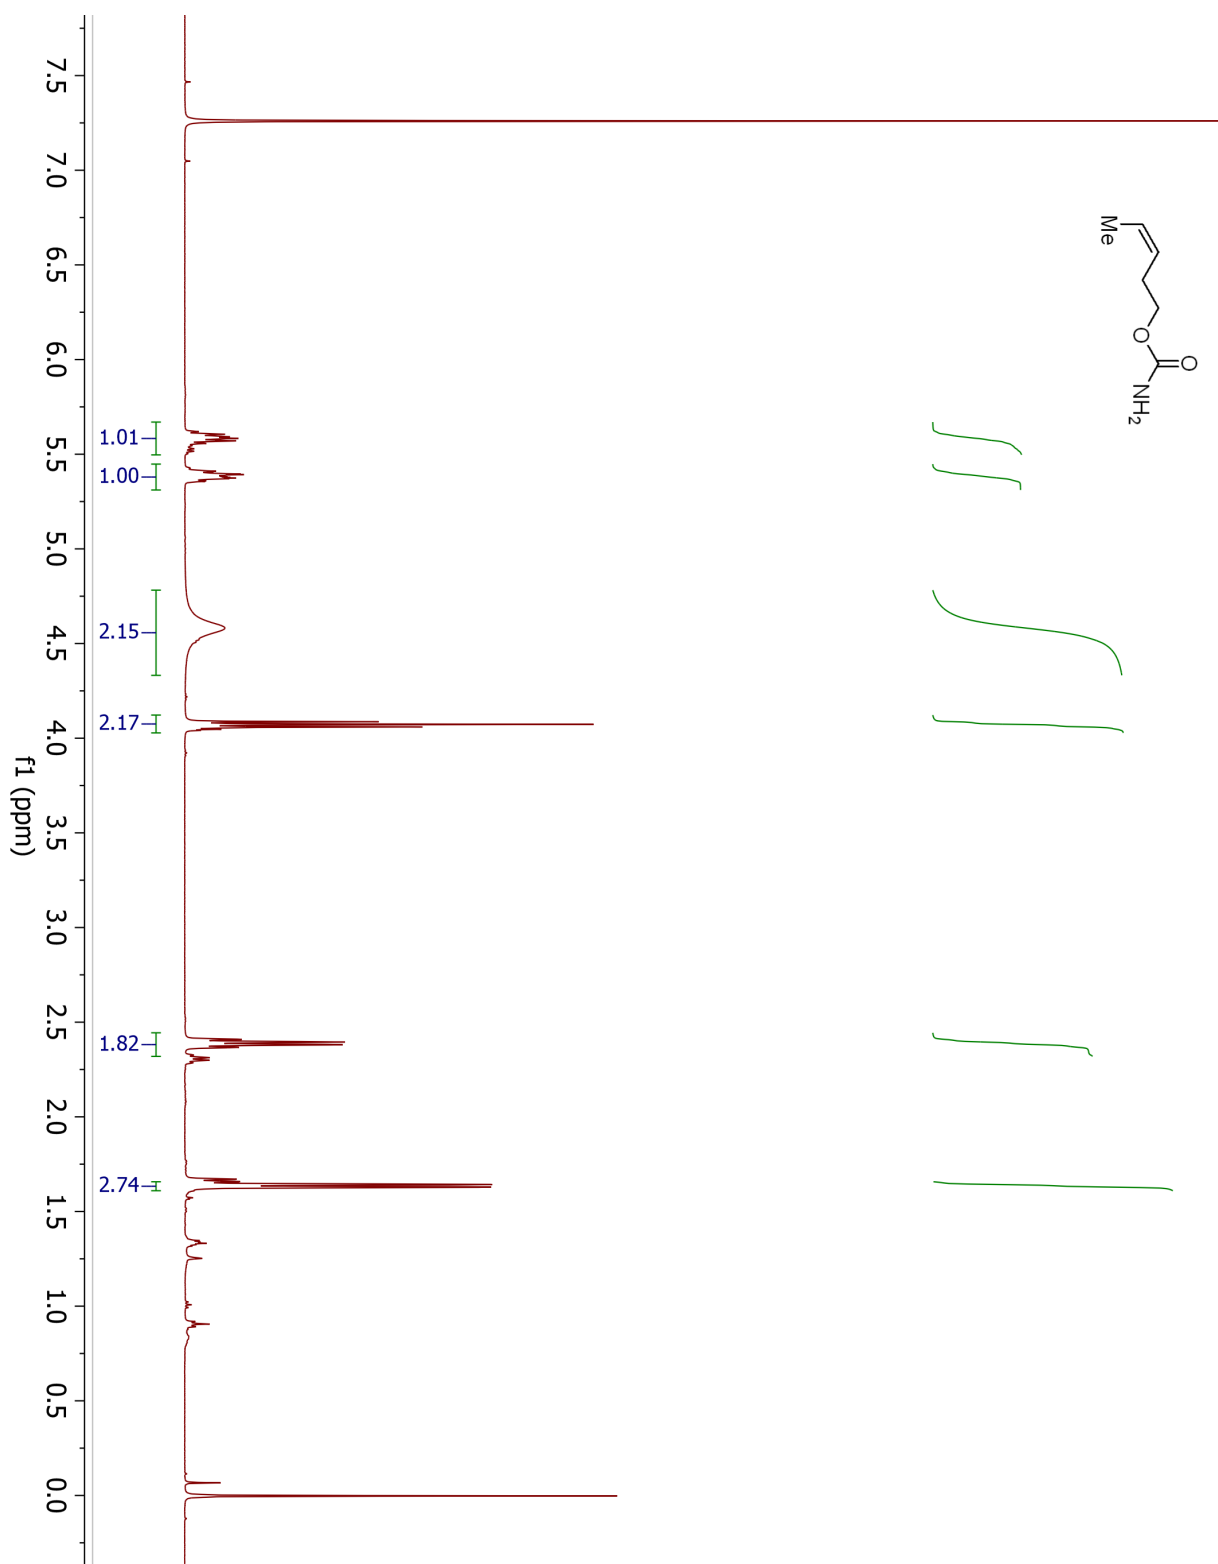

Supplementary Figure 13.  $^{13}\text{C}$  NMR (126MHz,  $\text{CDCl}_3$ ) for precursor to compound **2b**

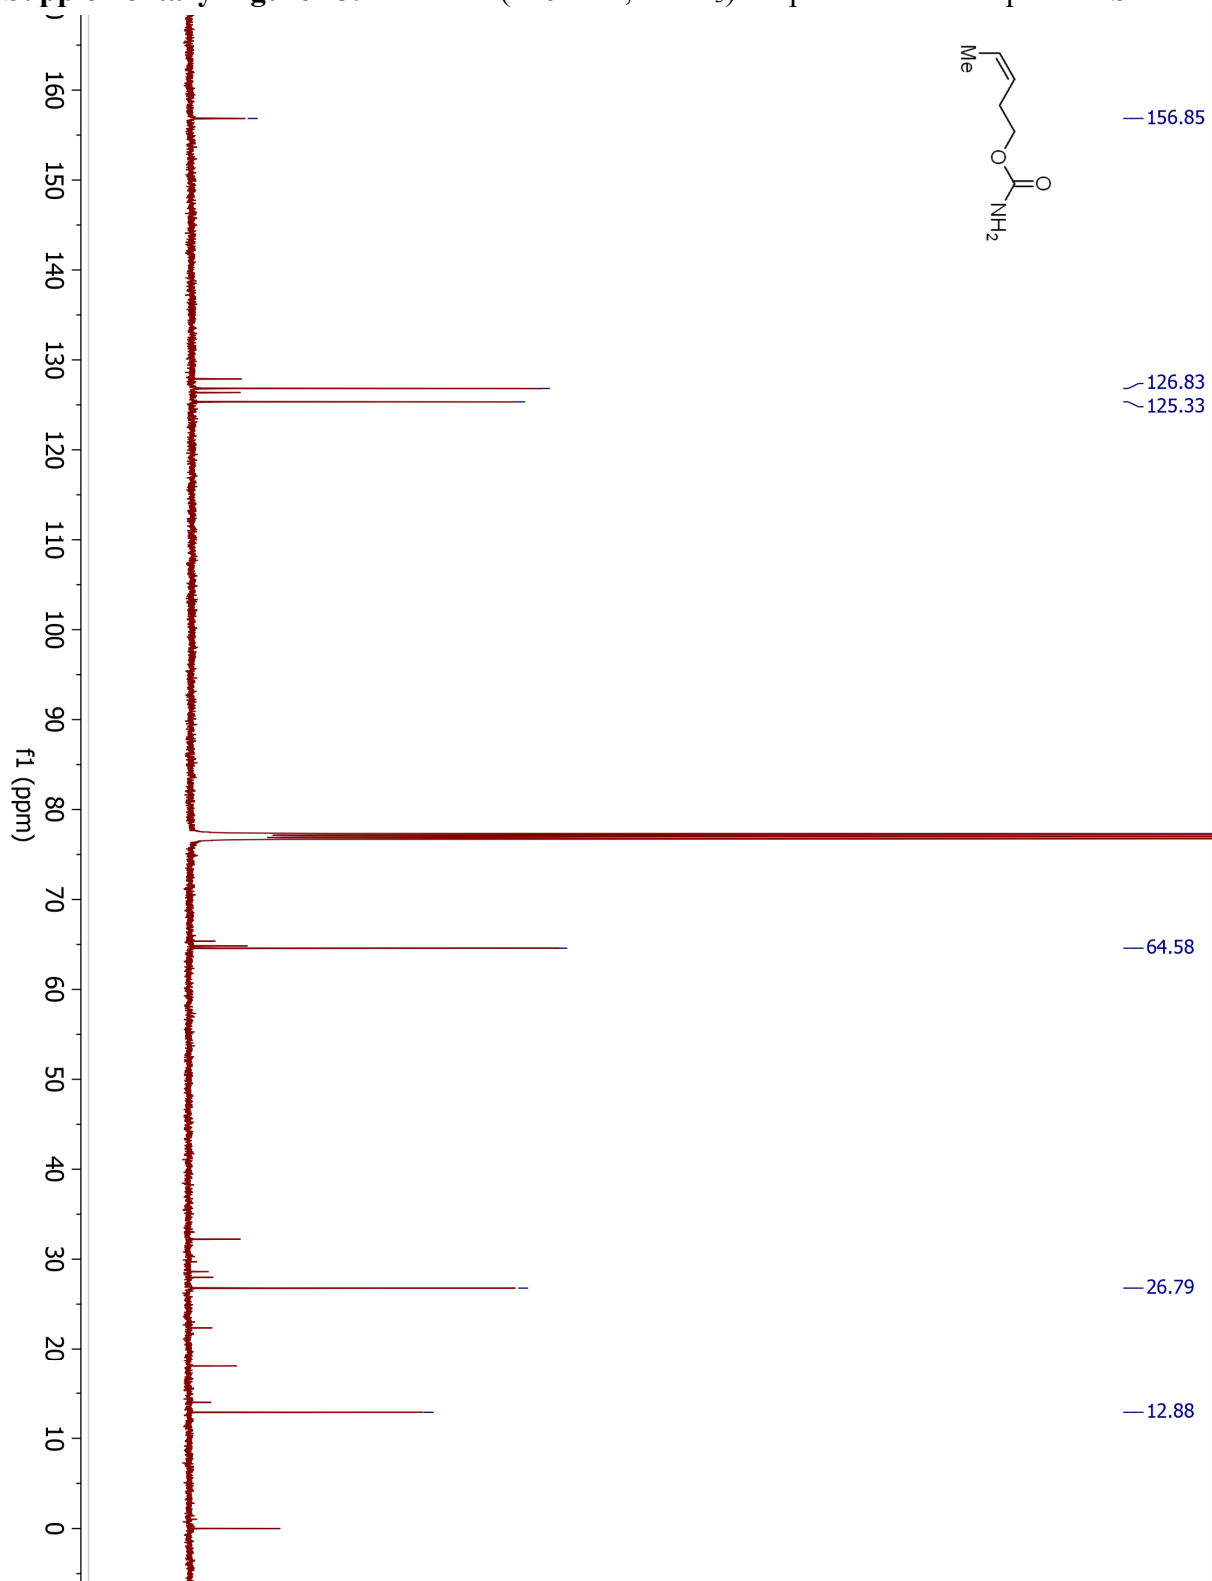

Supplementary Figure 14.  $^1\text{H}$  NMR (500 MHz,  $\text{CDCl}_3$ ) for precursor to compound **2e**

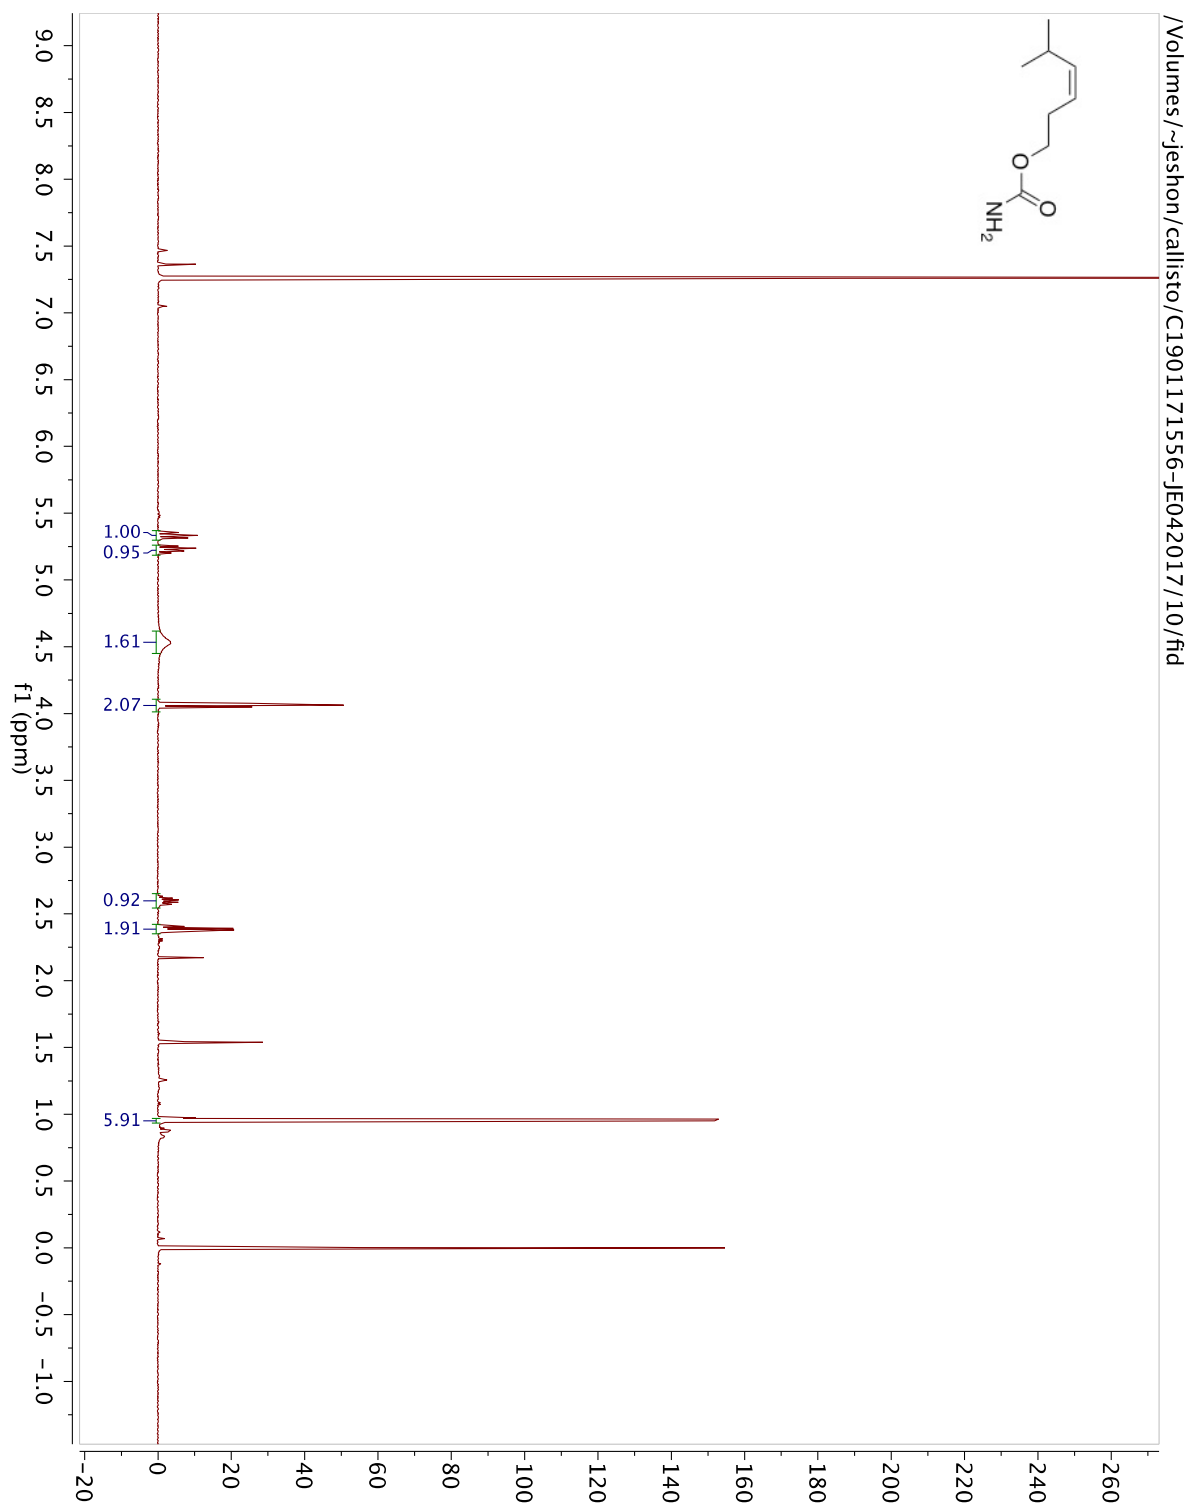

Supplementary Figure 15.  $^{13}\text{C}$  NMR (126MHz,  $\text{CDCl}_3$ ) for precursor to compound **2e**

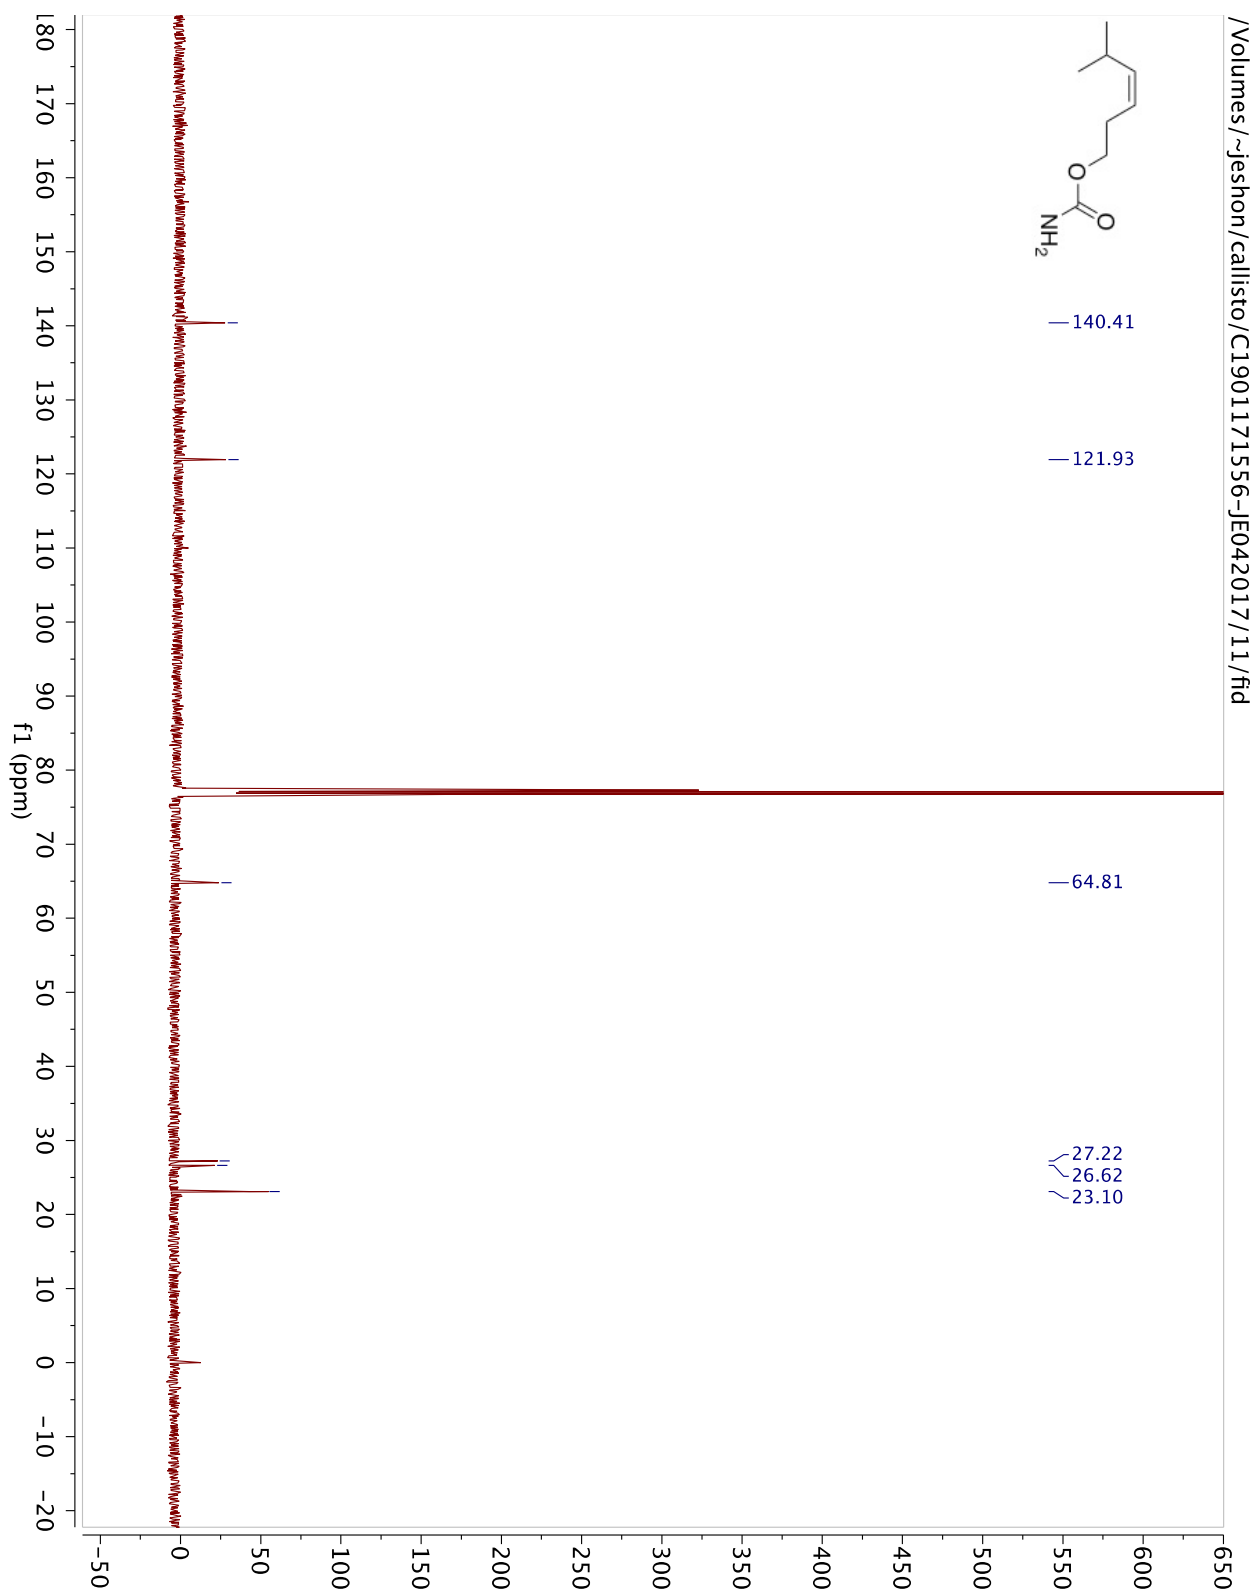

**Supplementary Figure 16.**  $^1\text{H}$  NMR (500 MHz,  $\text{CDCl}_3$ ) for precursor to compound **2f**

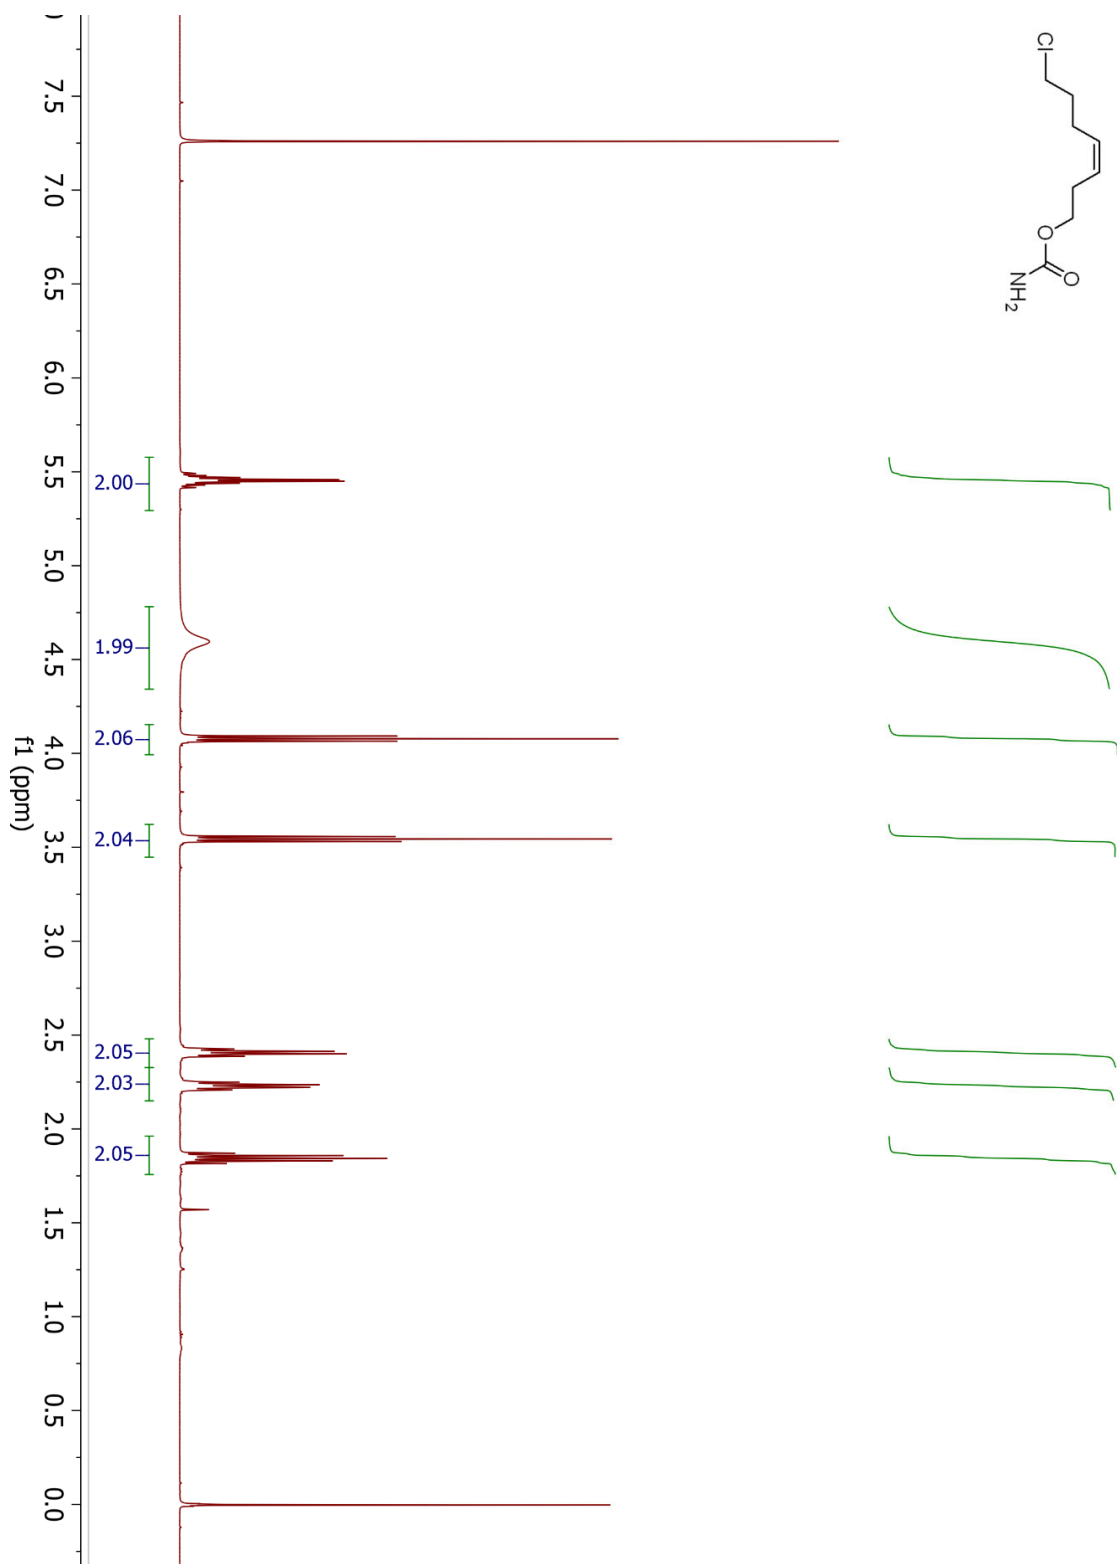

Supplementary Figure 17.  $^{13}\text{C}$  NMR (126 MHz,  $\text{CDCl}_3$ ) for precursor to compound **2f**

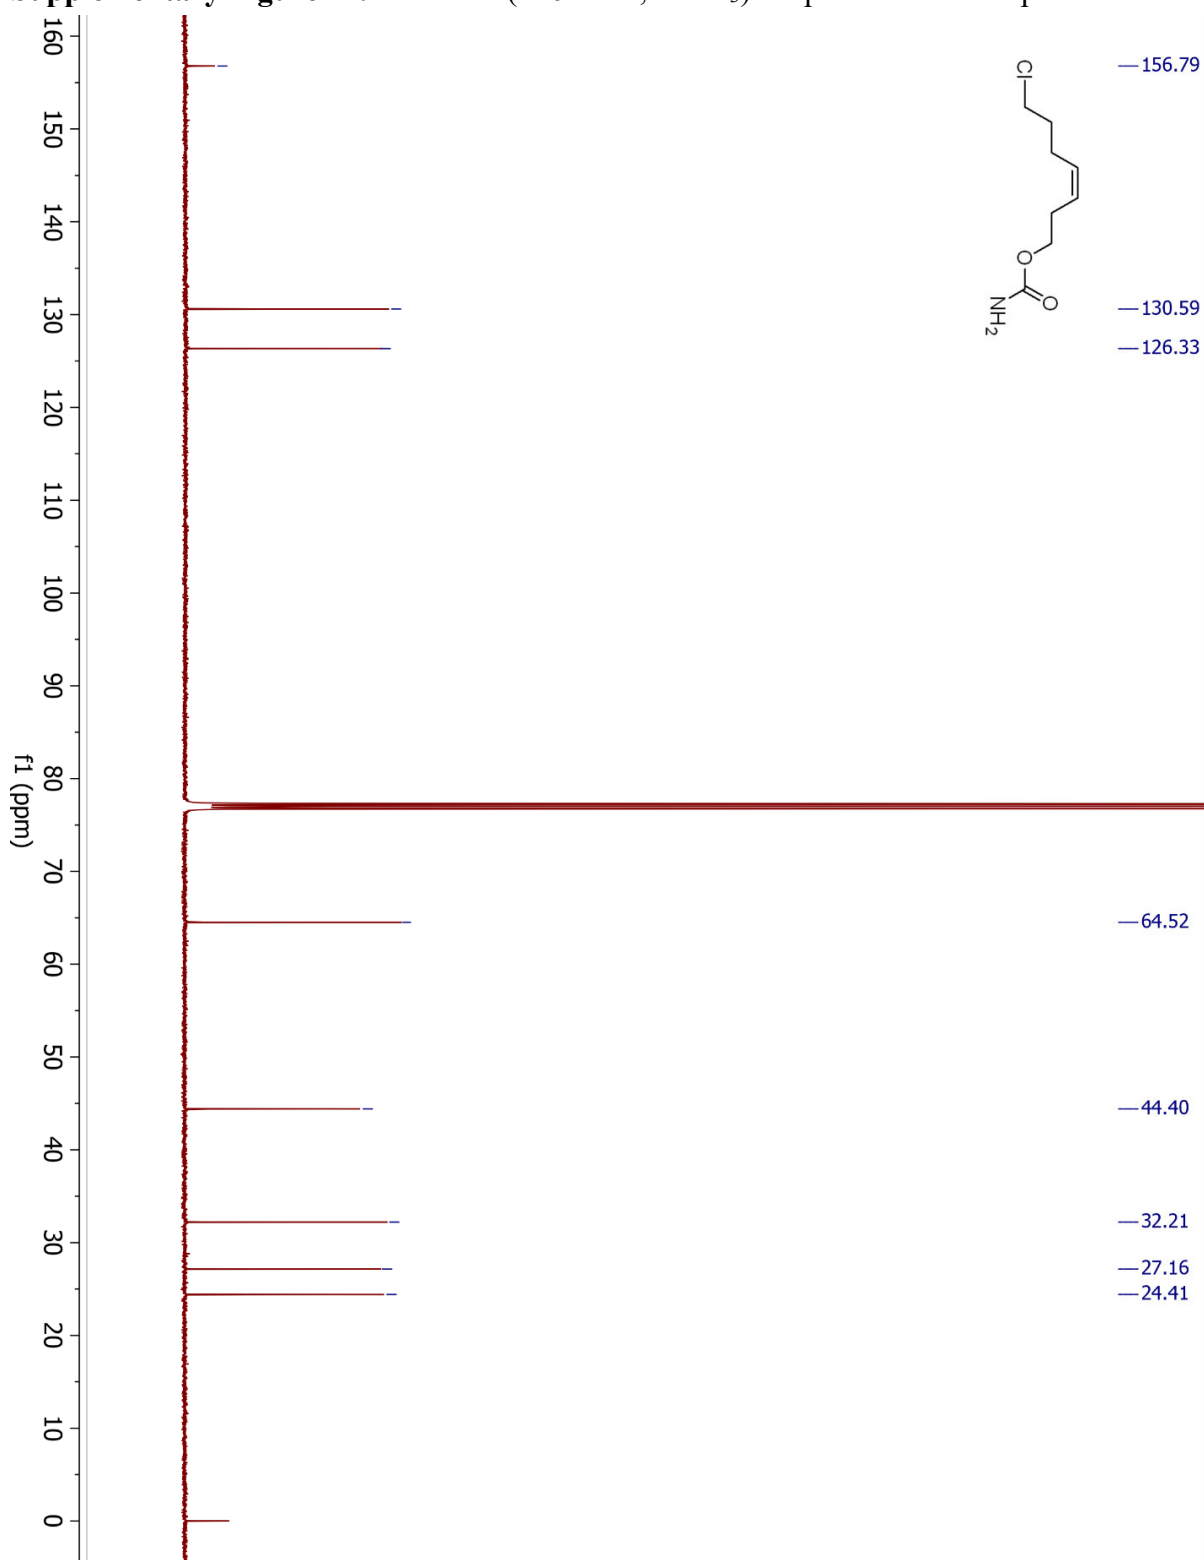

**Supplementary Figure 18.**  $^1\text{H}$  NMR (500 MHz,  $\text{CDCl}_3$ ) for precursor to compound **2h**

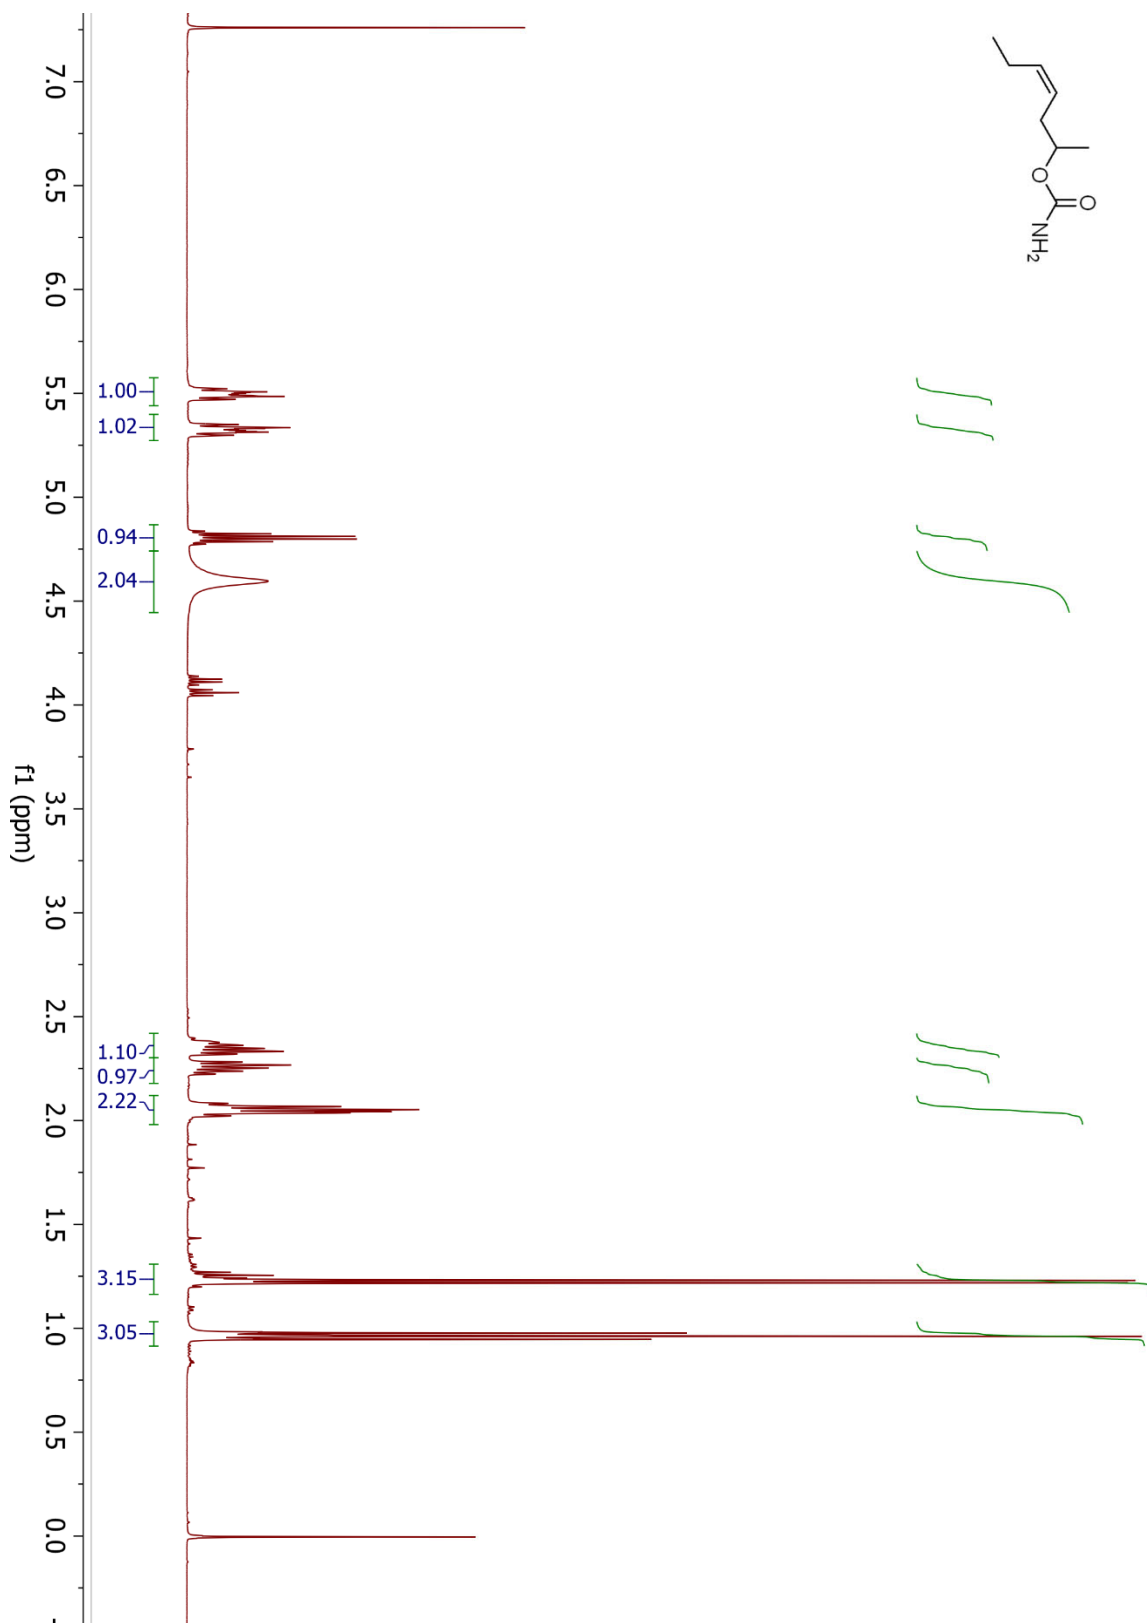

**Supplementary Figure 19.**  $^{13}\text{C}$  NMR (126 MHz,  $\text{CDCl}_3$ ) for precursor compound **2h**

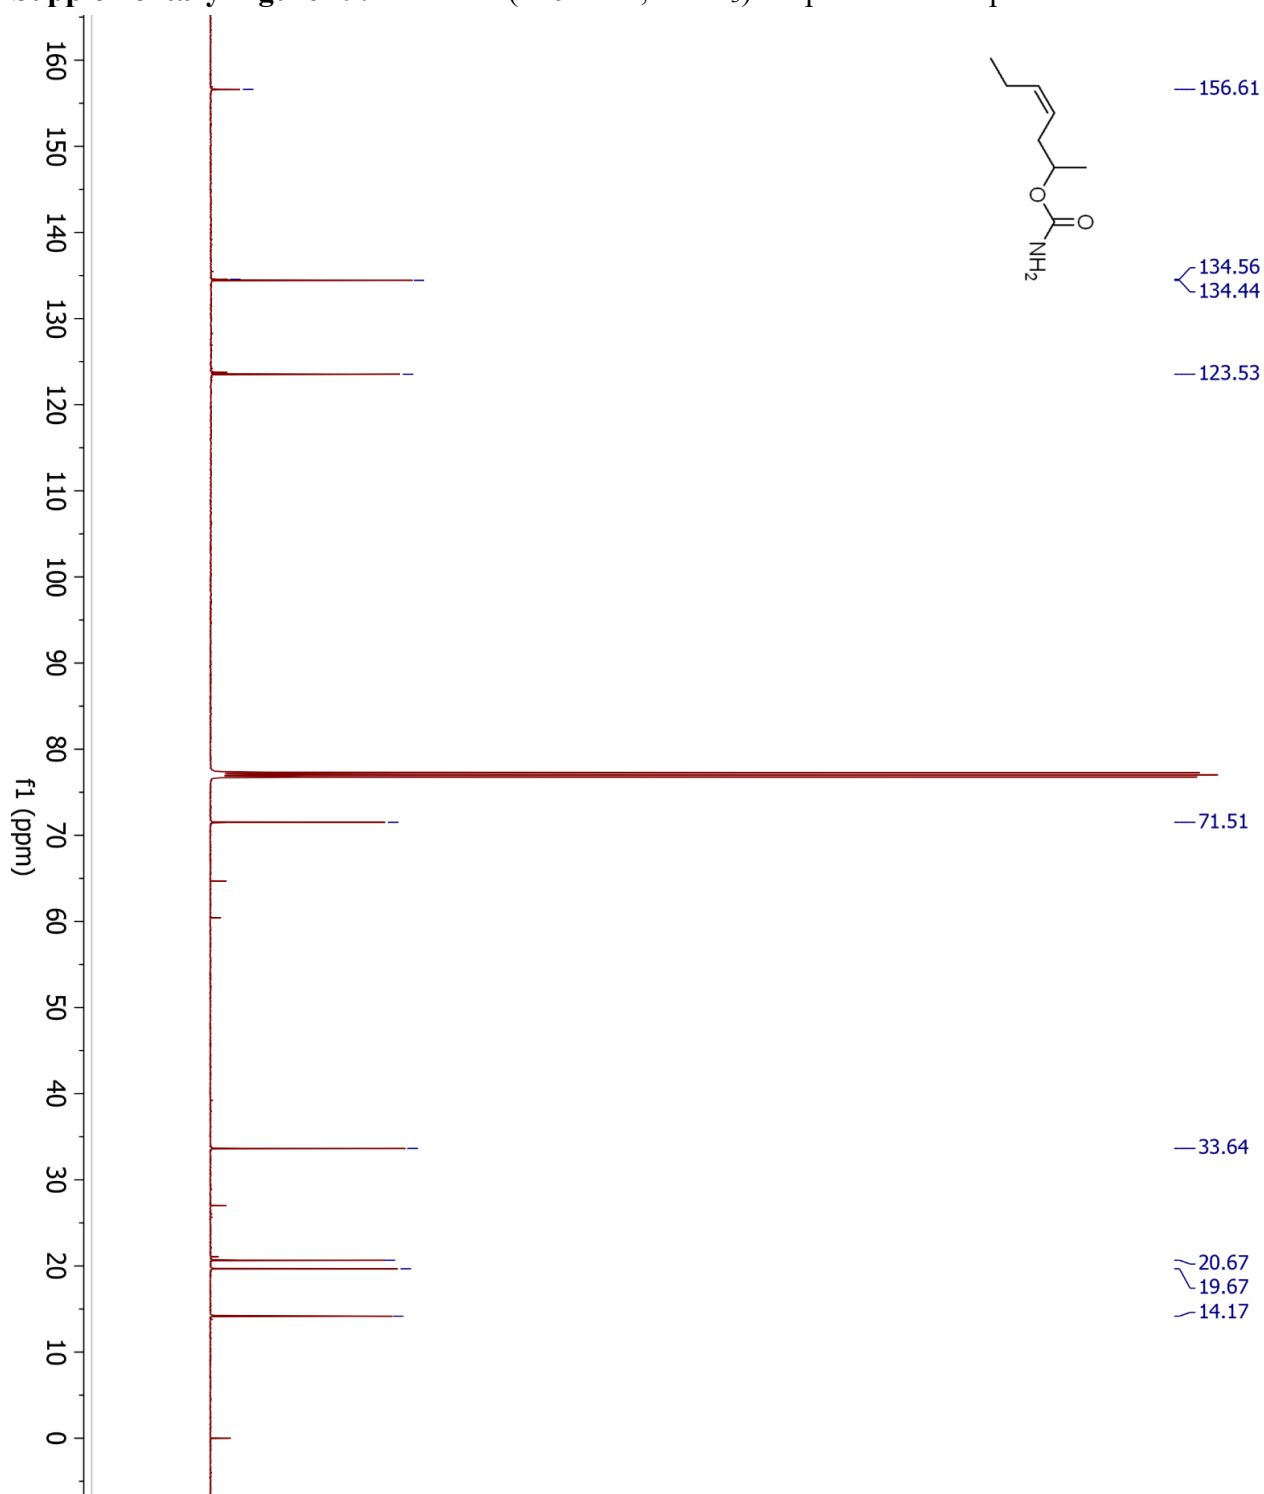

Supplementary Figure 20.  $^1\text{H}$  NMR (500 MHz,  $\text{CDCl}_3$ ) for compound **2a**

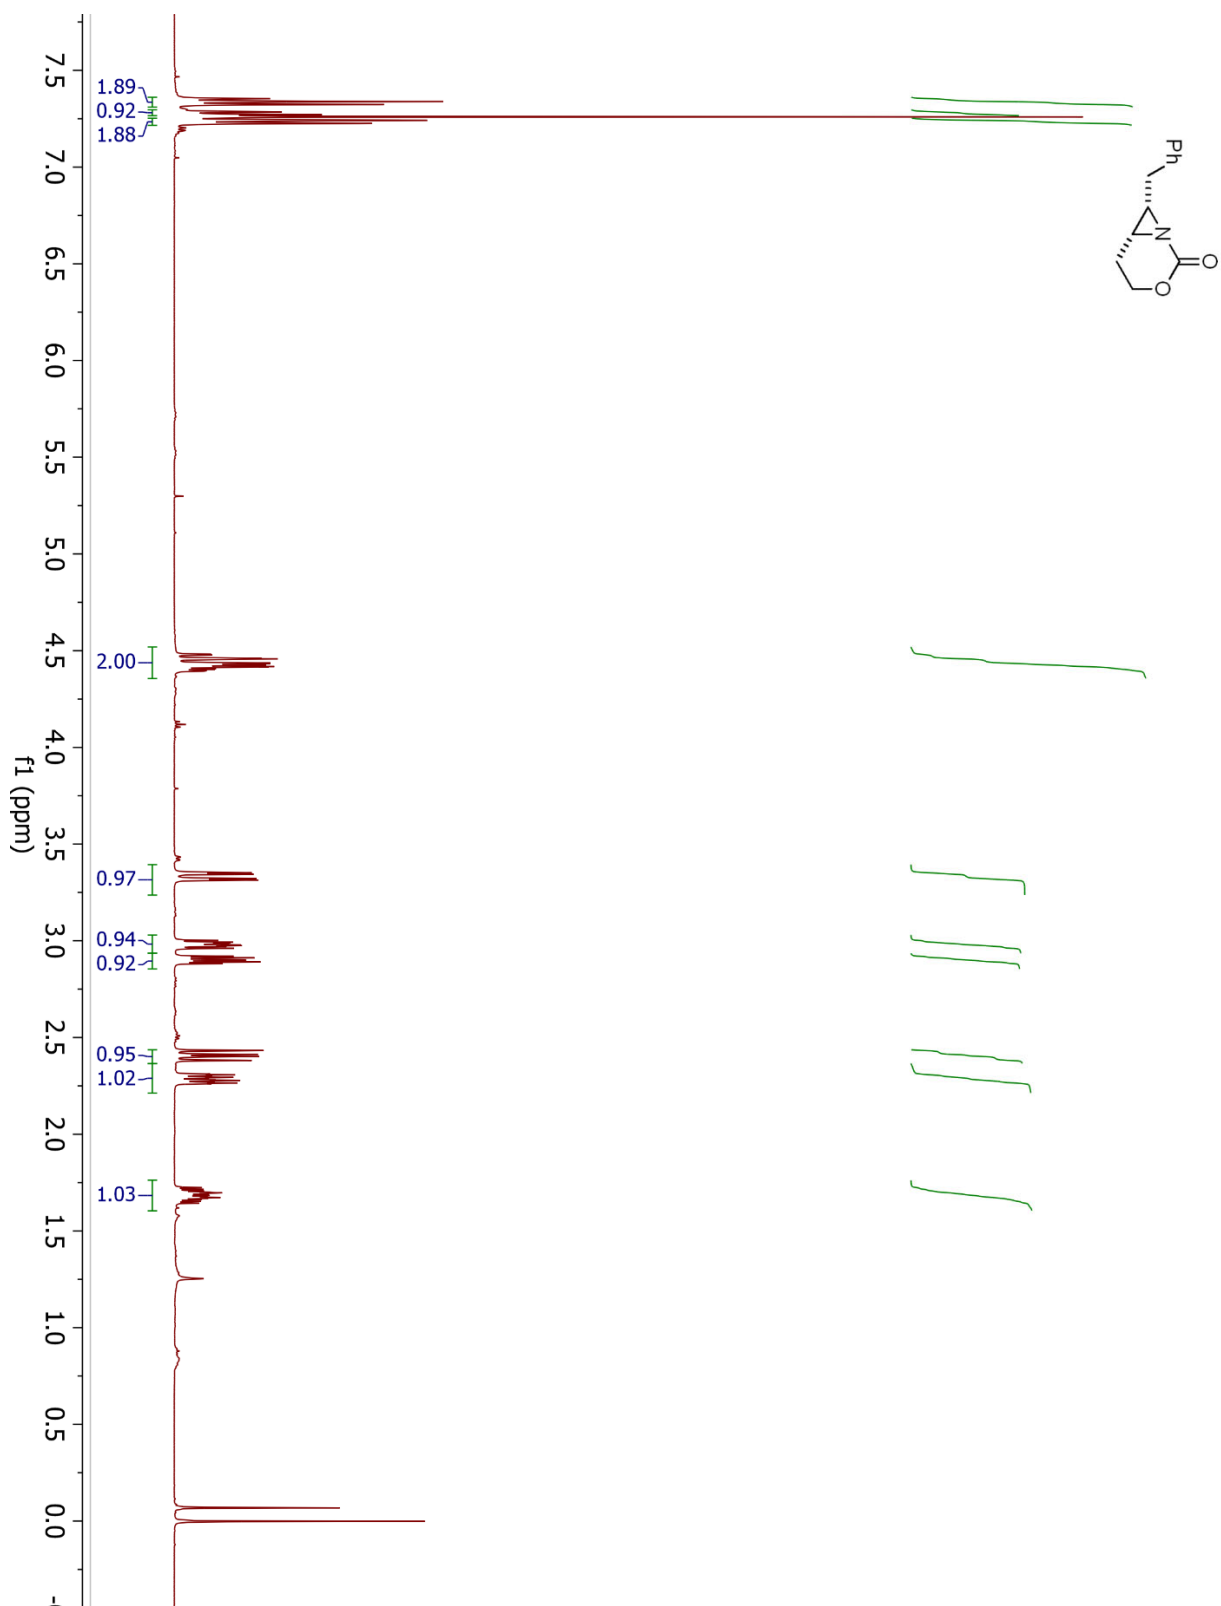

**Supplementary Figure 21.**  $^{13}\text{C}$  NMR (126 MHz,  $\text{CDCl}_3$ ) for compound **2a**

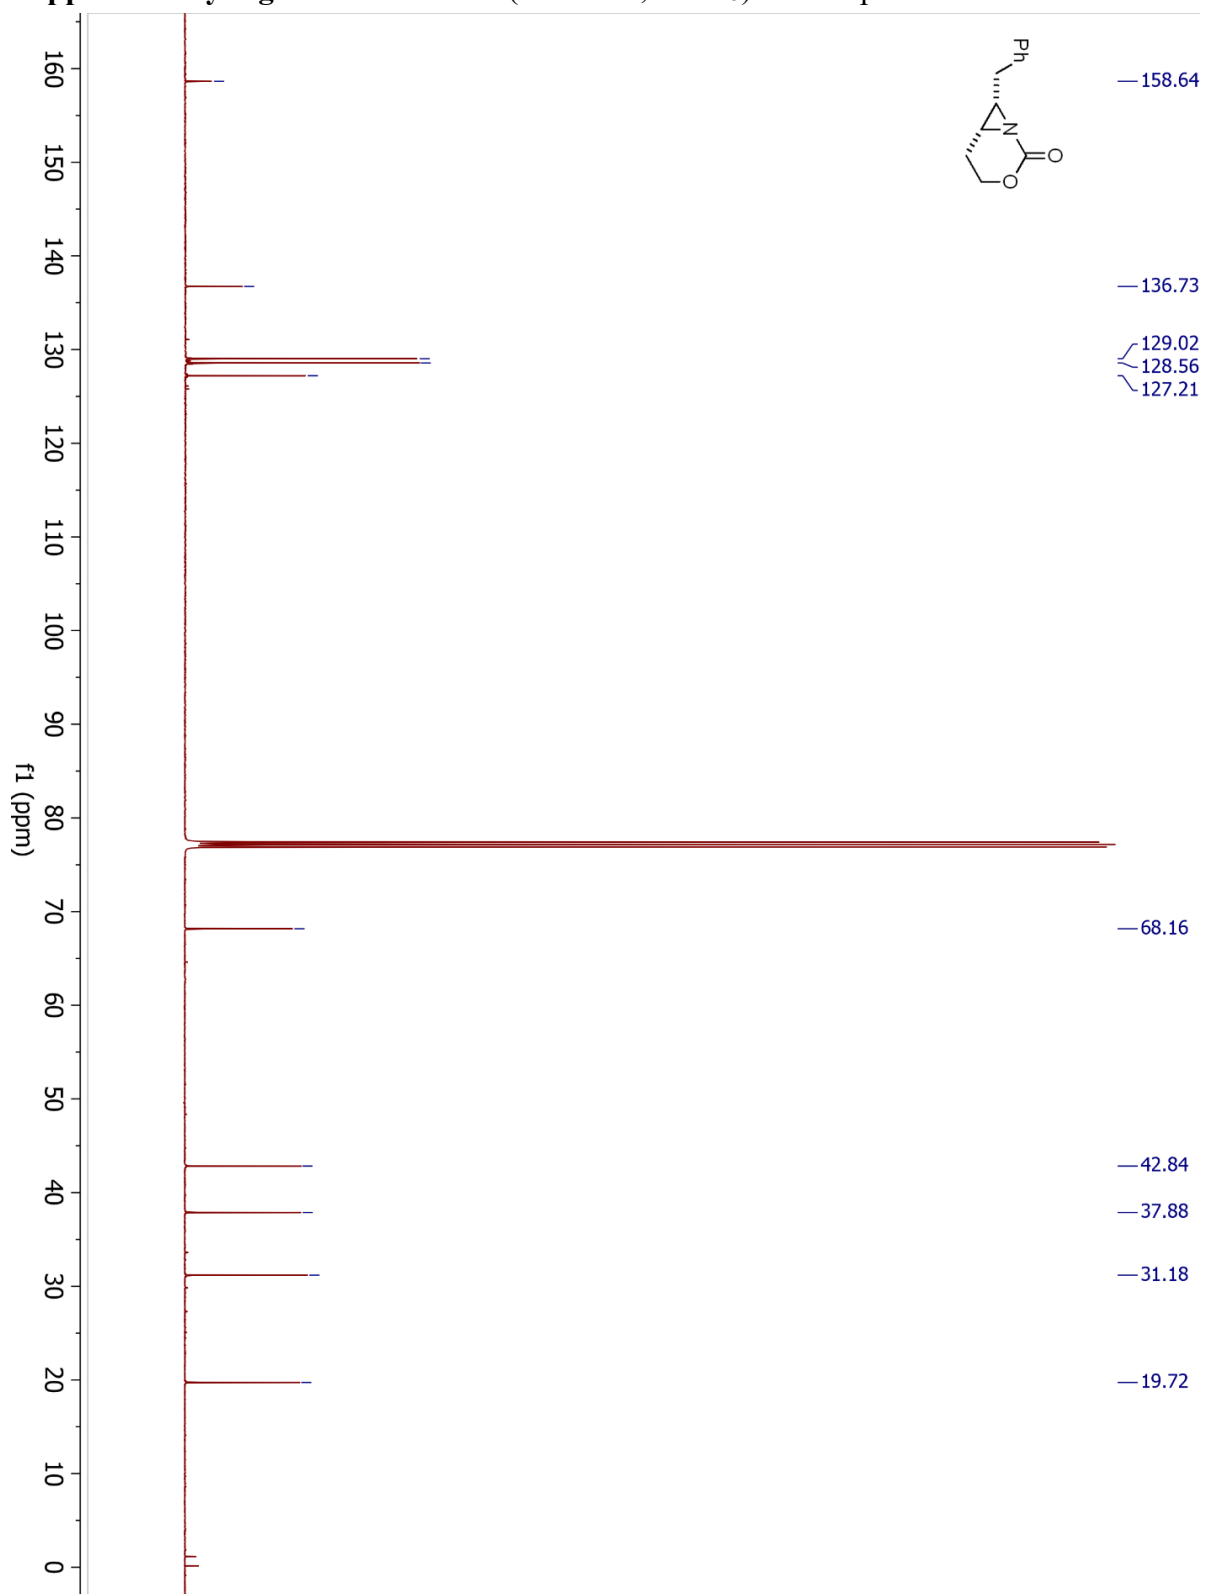

**Supplementary Figure 22.**  $^1\text{H}$  NMR (500 MHz,  $\text{CDCl}_3$ ) for compound **2b**

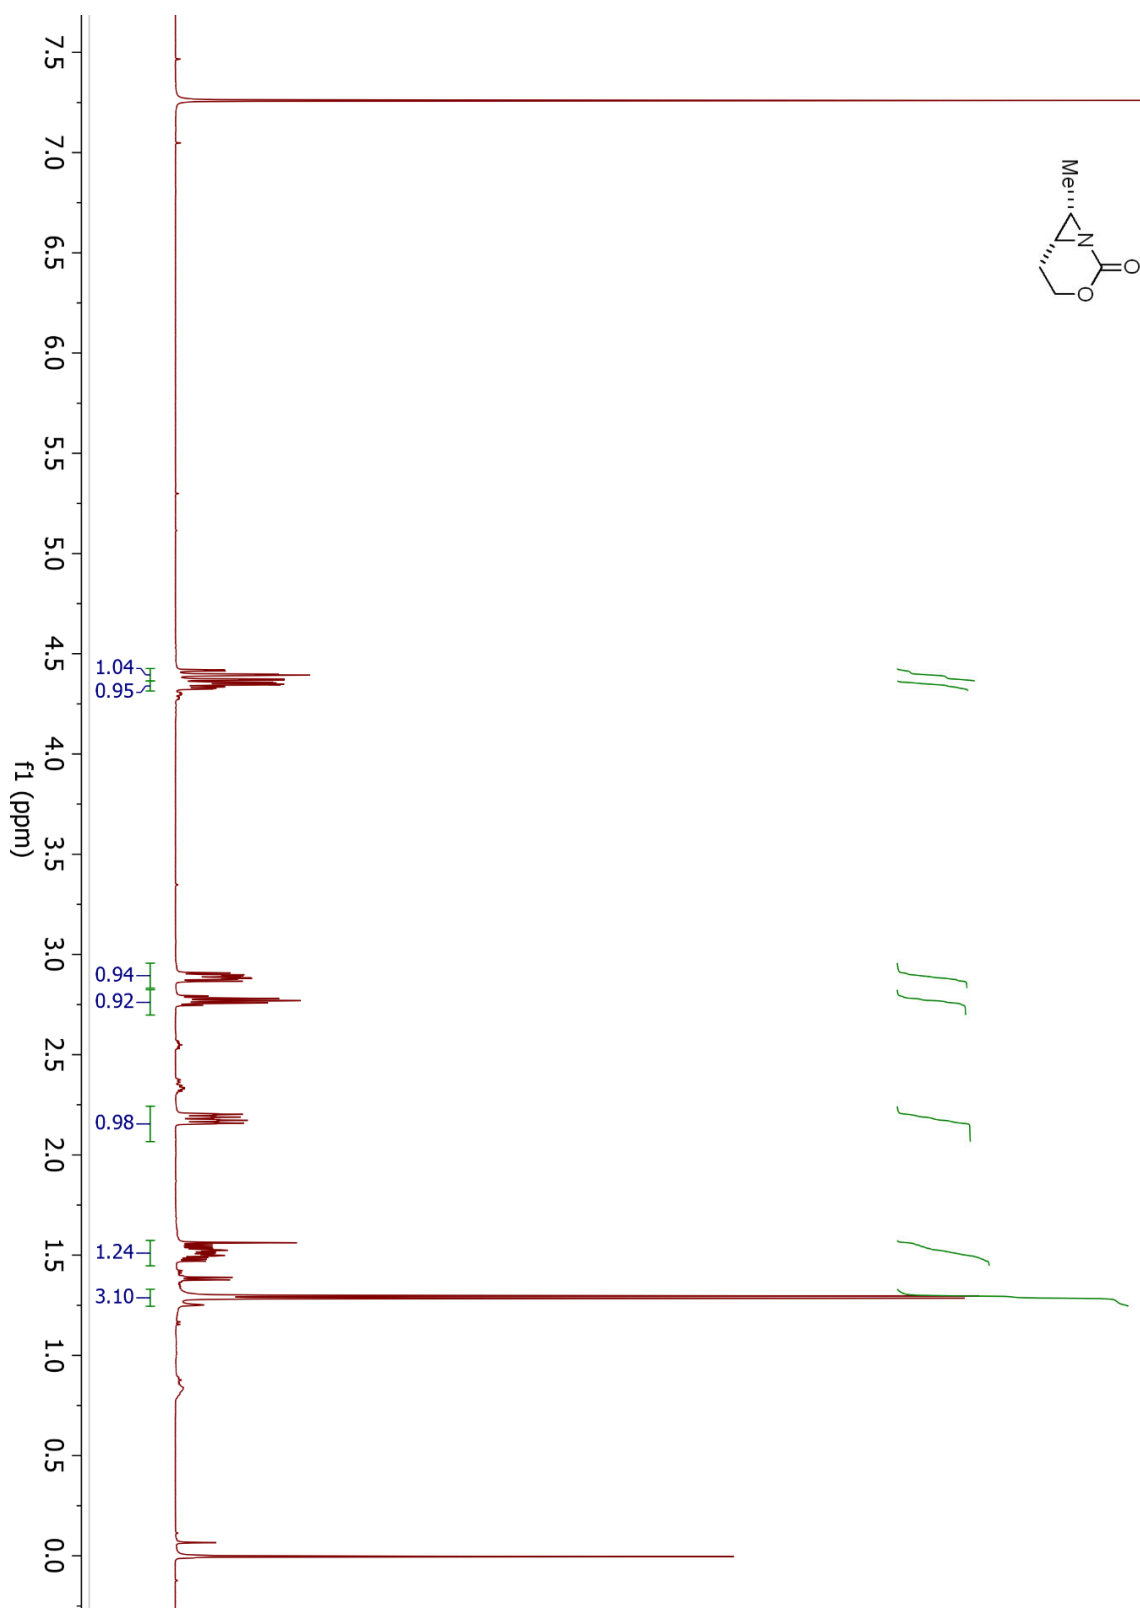

**Supplementary Figure 23.**  $^{13}\text{C}$  NMR (126 MHz,  $\text{CDCl}_3$ ) for compound **2b**

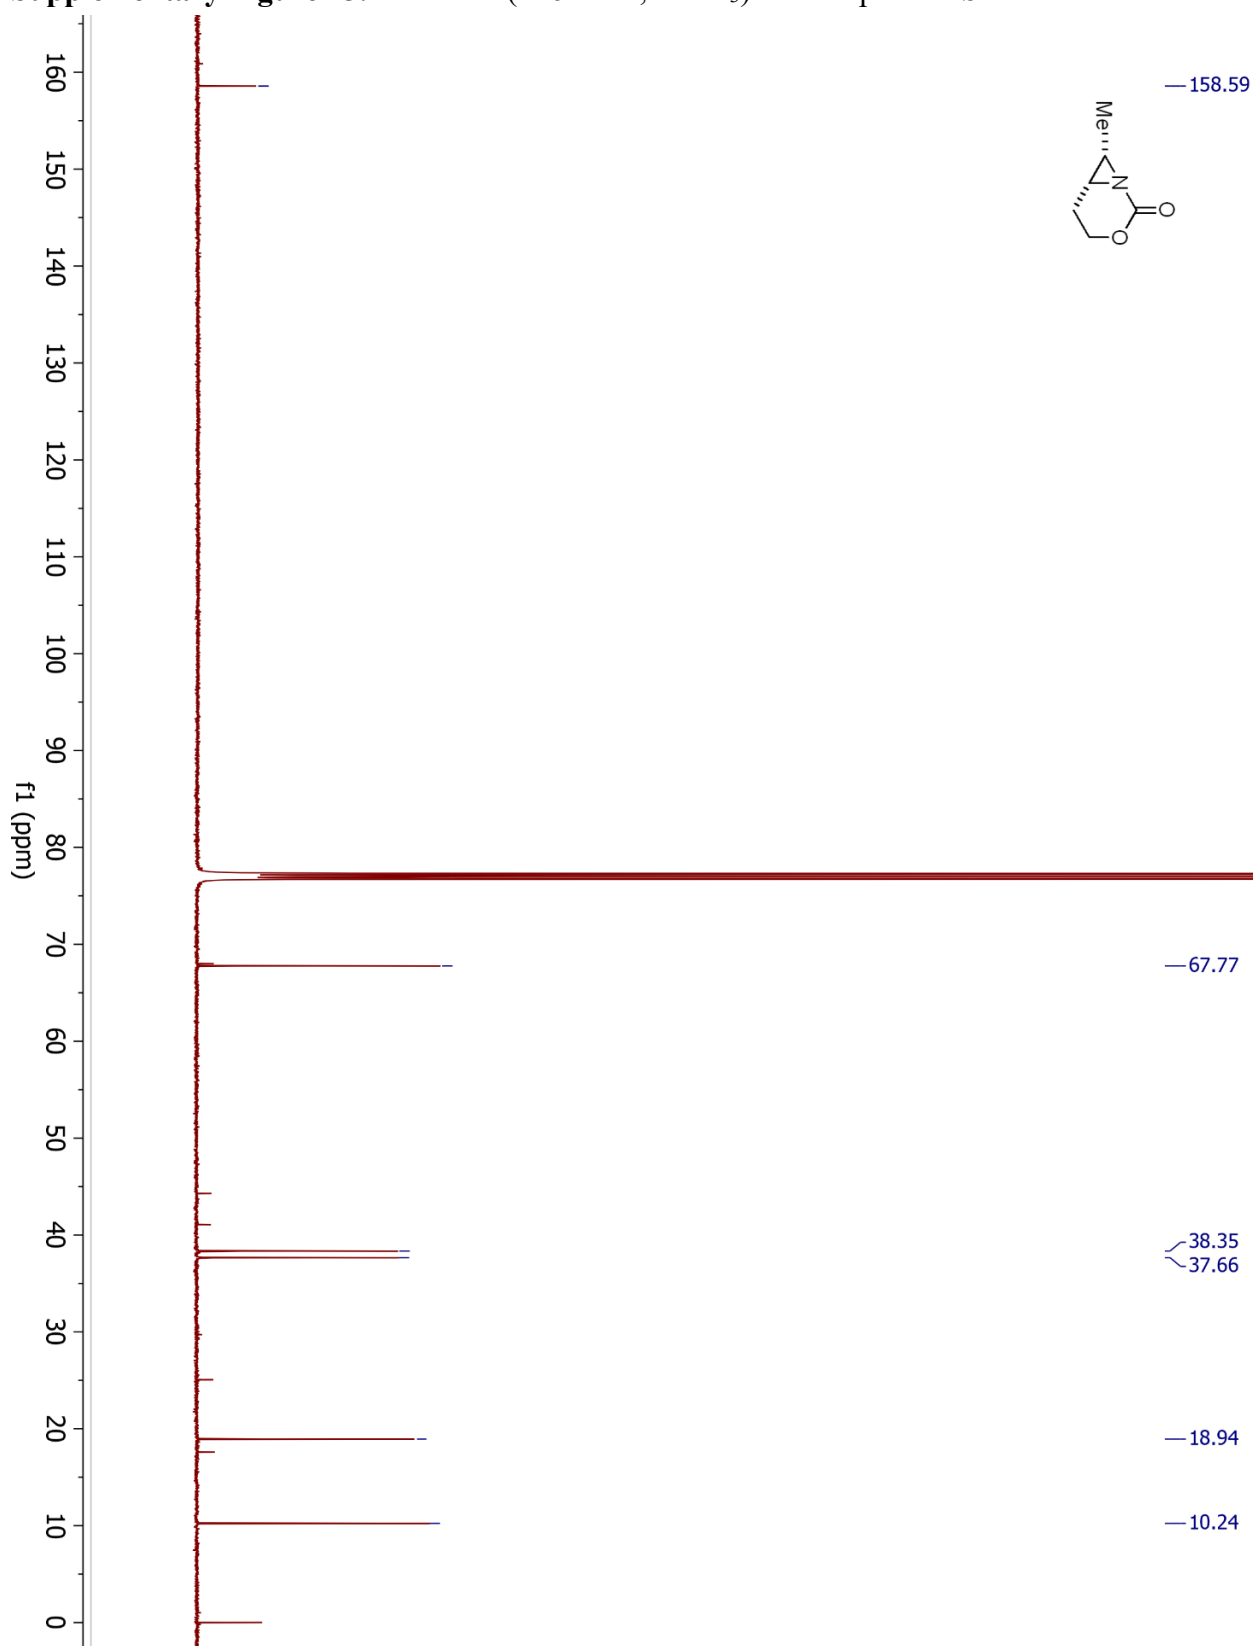

Supplementary Figure 24.  $^1\text{H}$  NMR (500 MHz,  $\text{CDCl}_3$ ) for compound **2d**

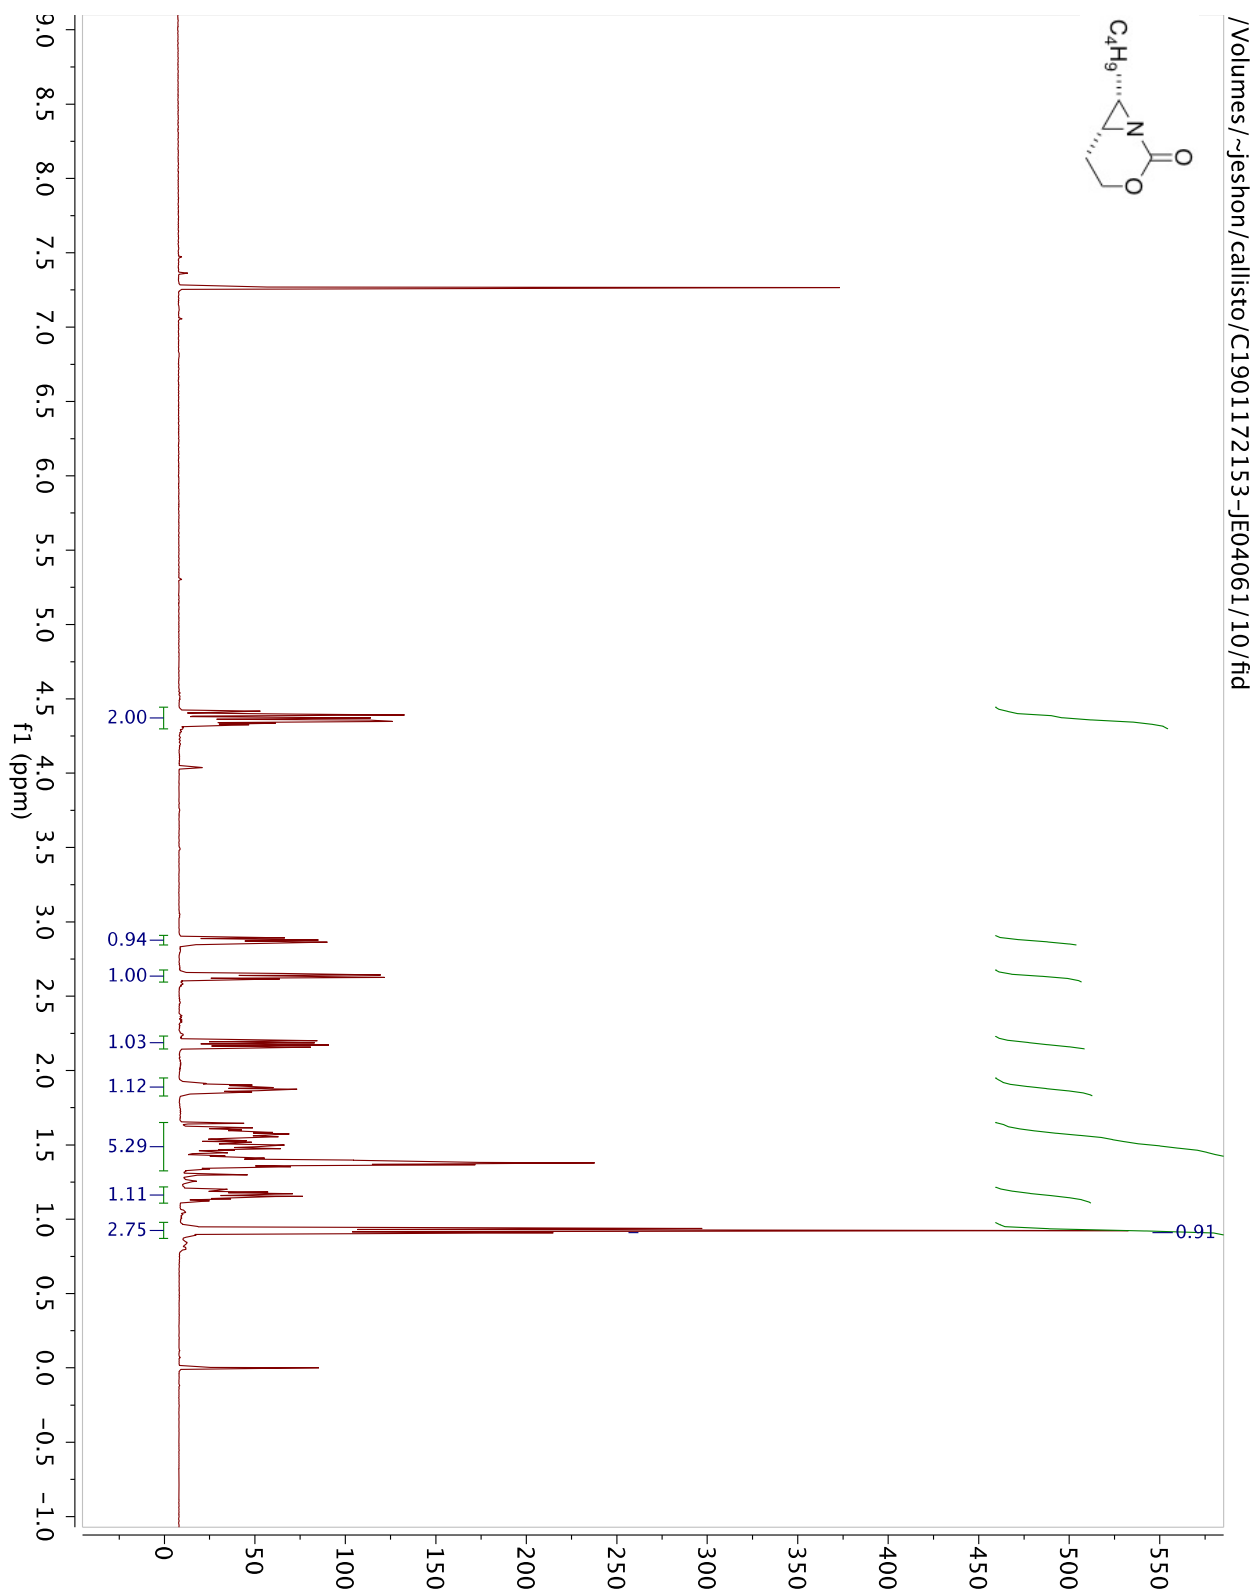

Supplementary Figure 25.  $^{13}\text{C}$  NMR (126 MHz,  $\text{CDCl}_3$ ) for compound **2d**

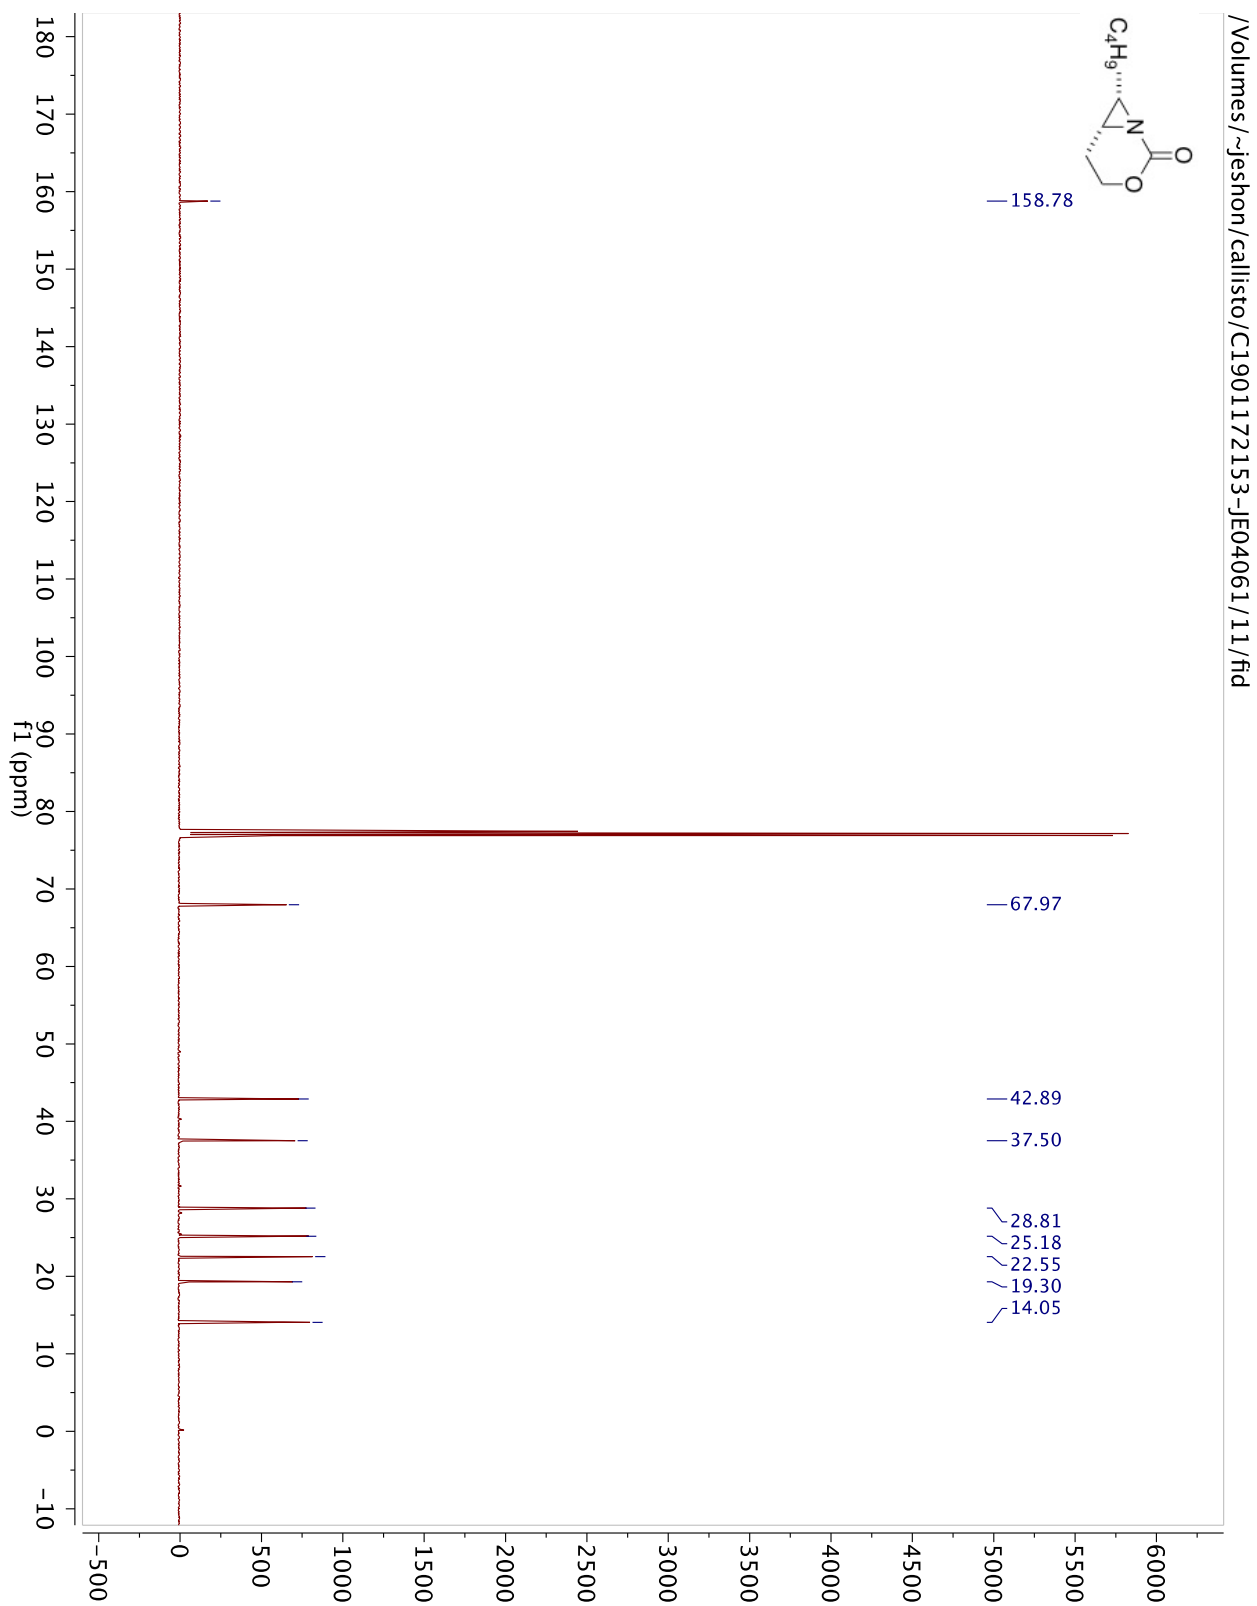

Supplementary Figure 26.  $^1\text{H}$  NMR (500 MHz,  $\text{CDCl}_3$ ) for compound **2e**

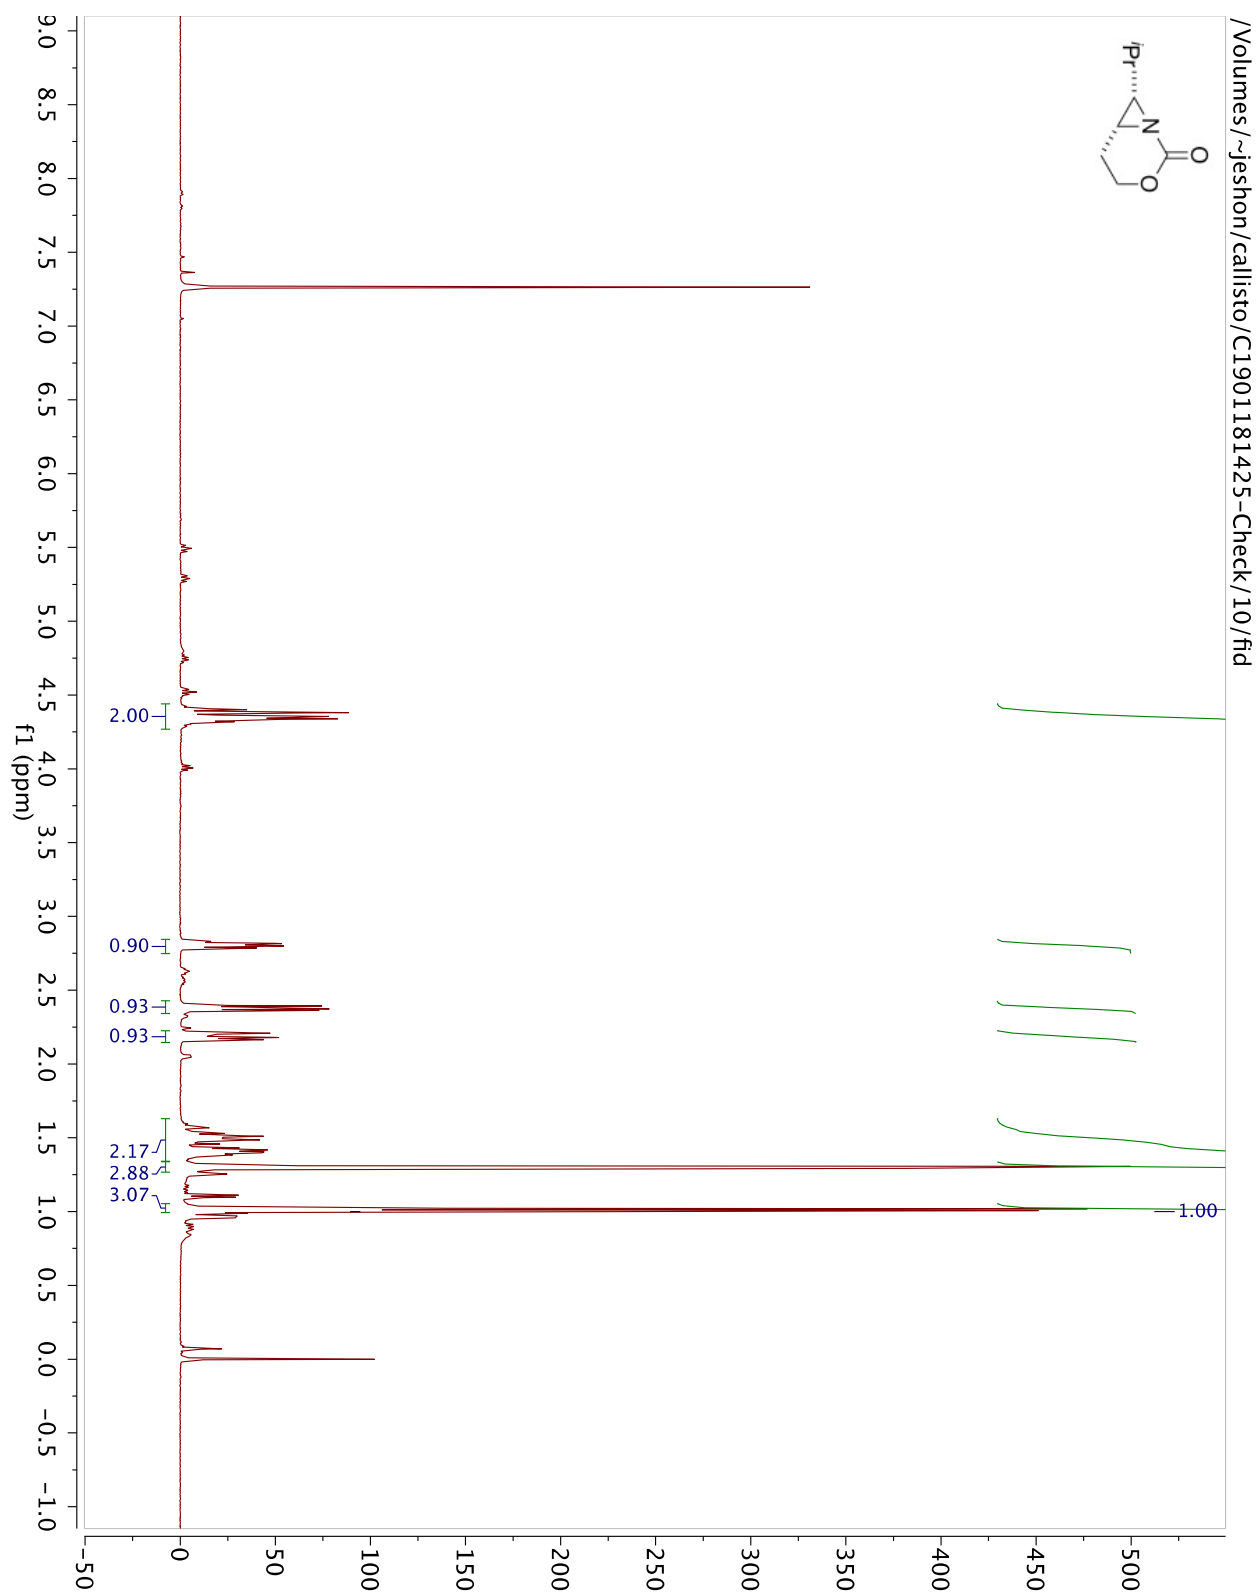

Supplementary Figure 27.  $^{13}\text{C}$  NMR (126 MHz,  $\text{CDCl}_3$ ) for compound **2e**

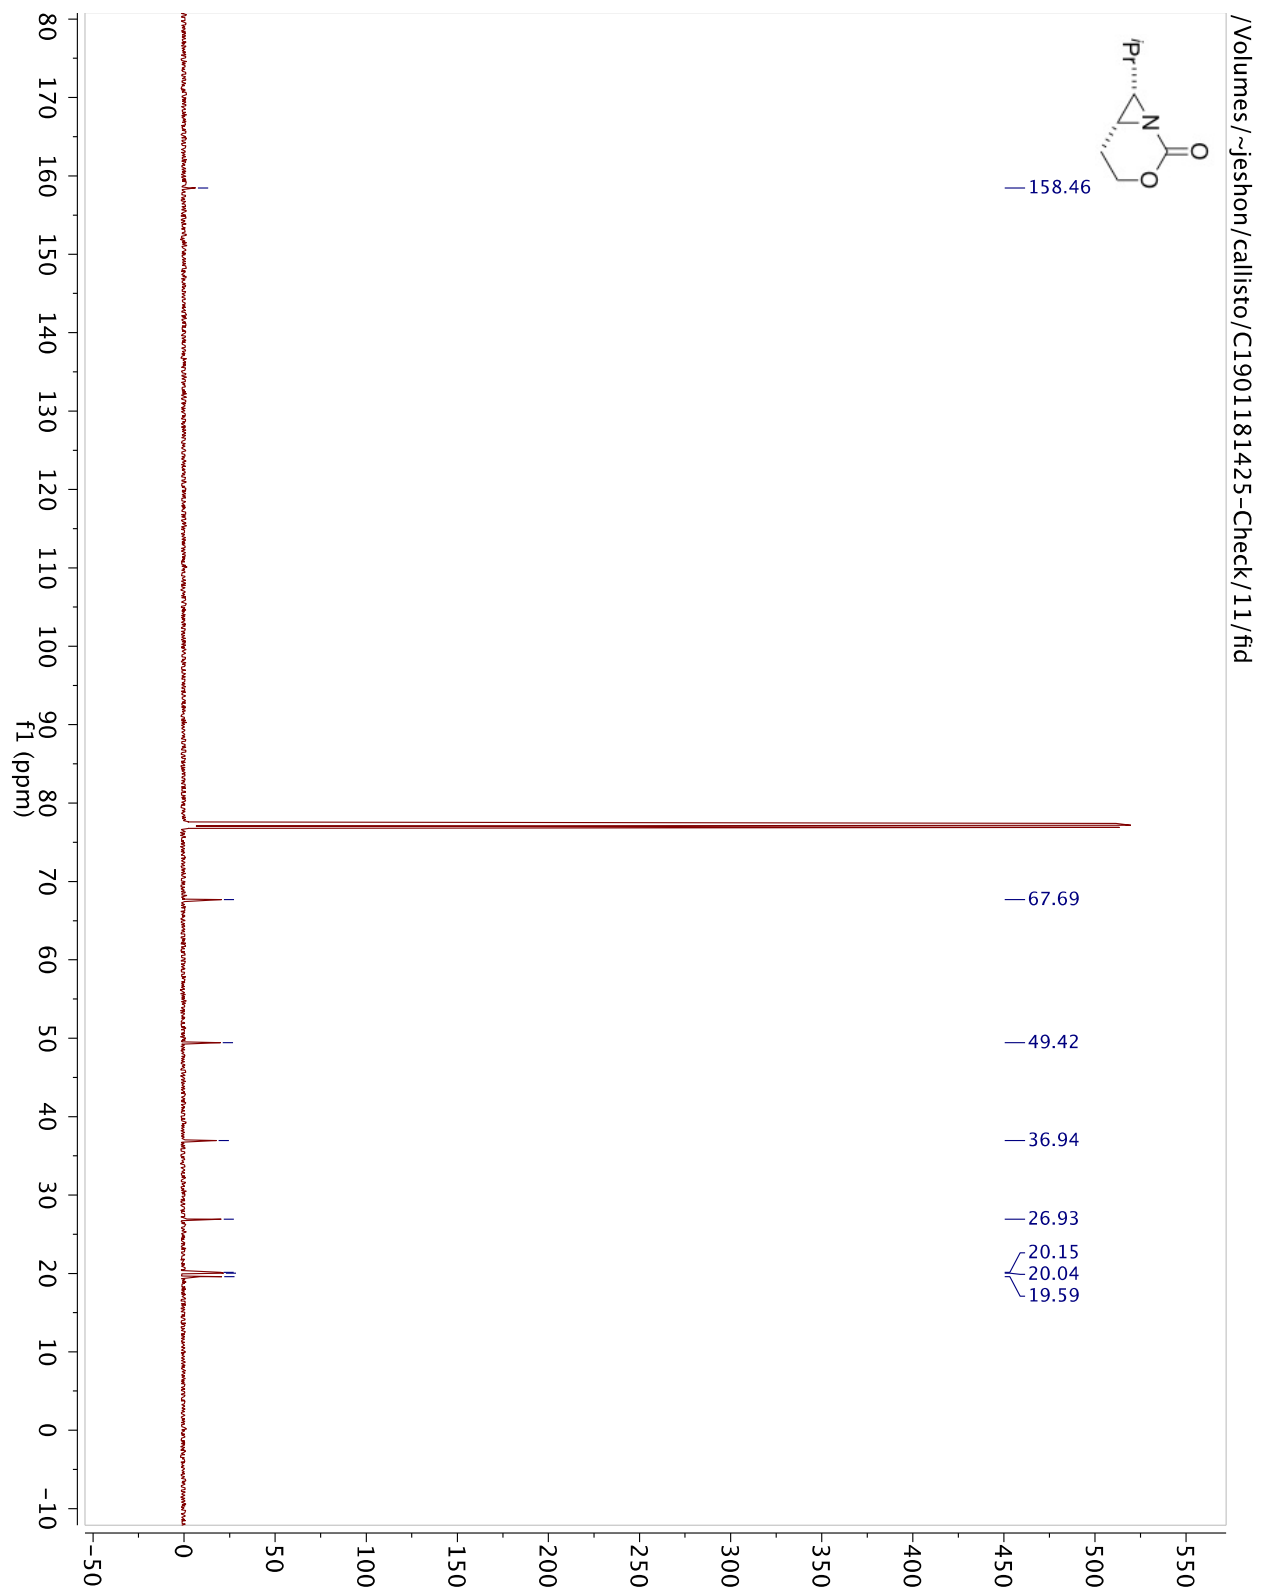

**Supplementary Figure 28.**  $^1\text{H}$  NMR (500 MHz,  $\text{CDCl}_3$ ) for compound **2f**

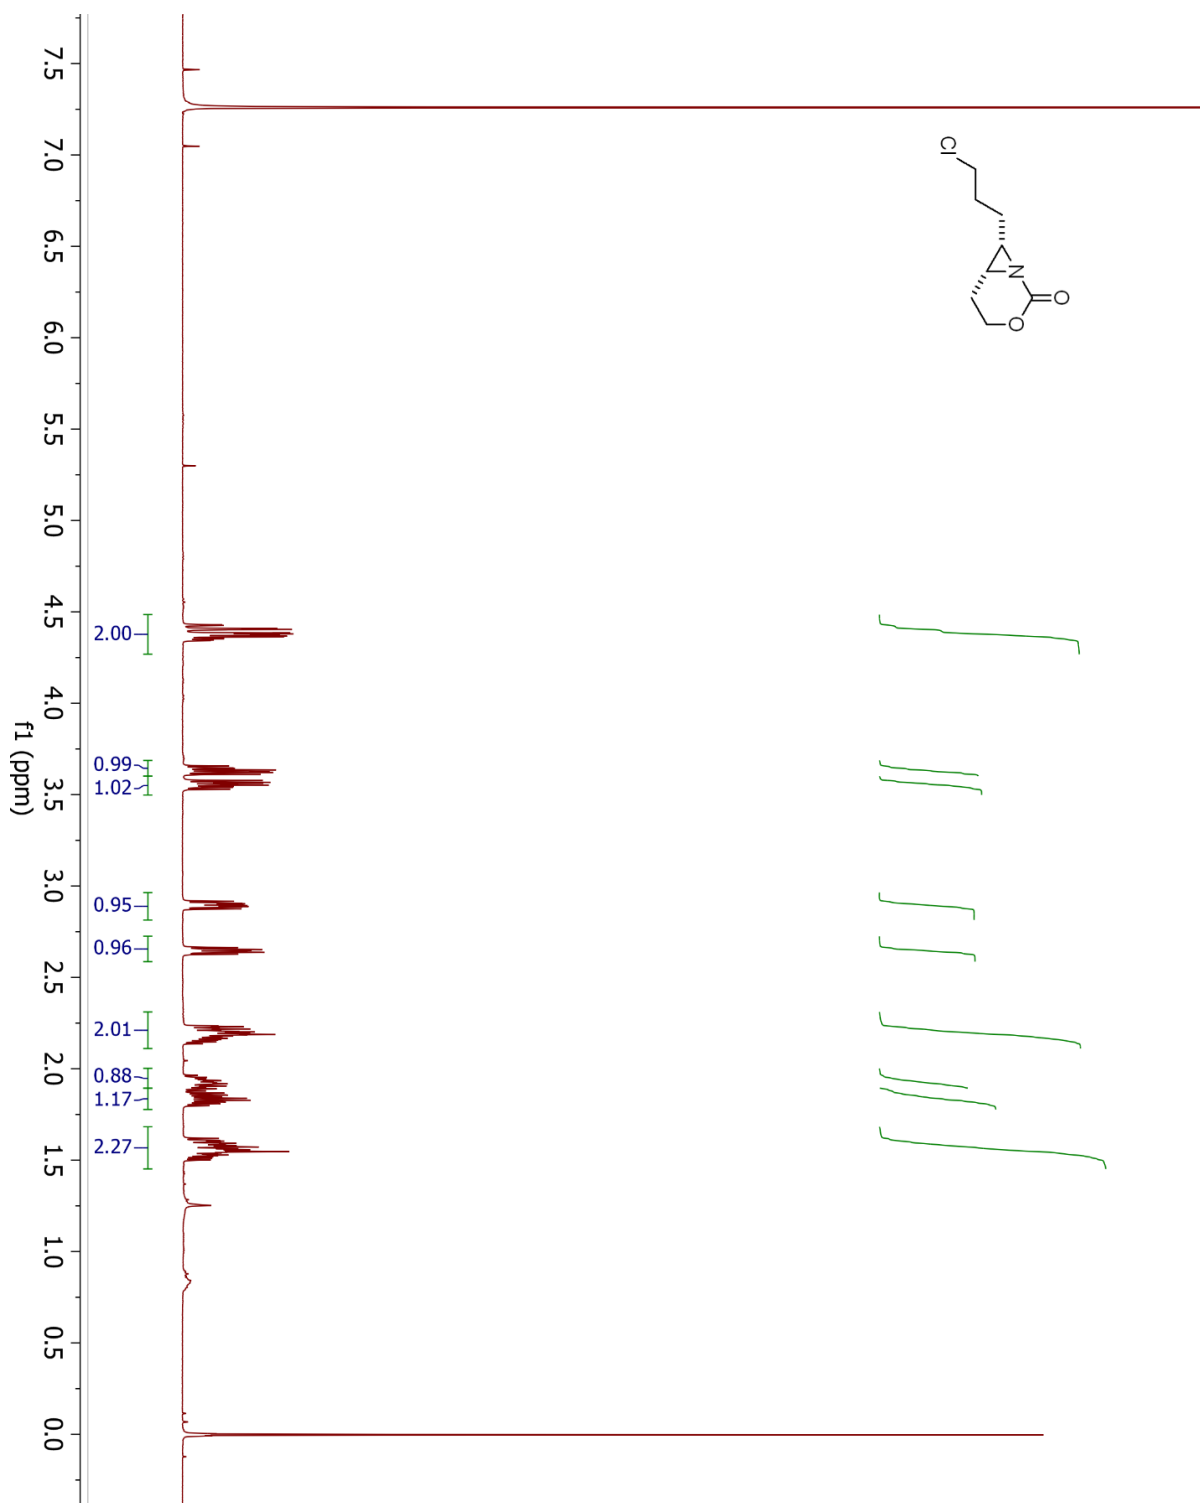

Supplementary Figure 29.  $^{13}\text{C}$  NMR (126 MHz,  $\text{CDCl}_3$ ) for compound **2f**

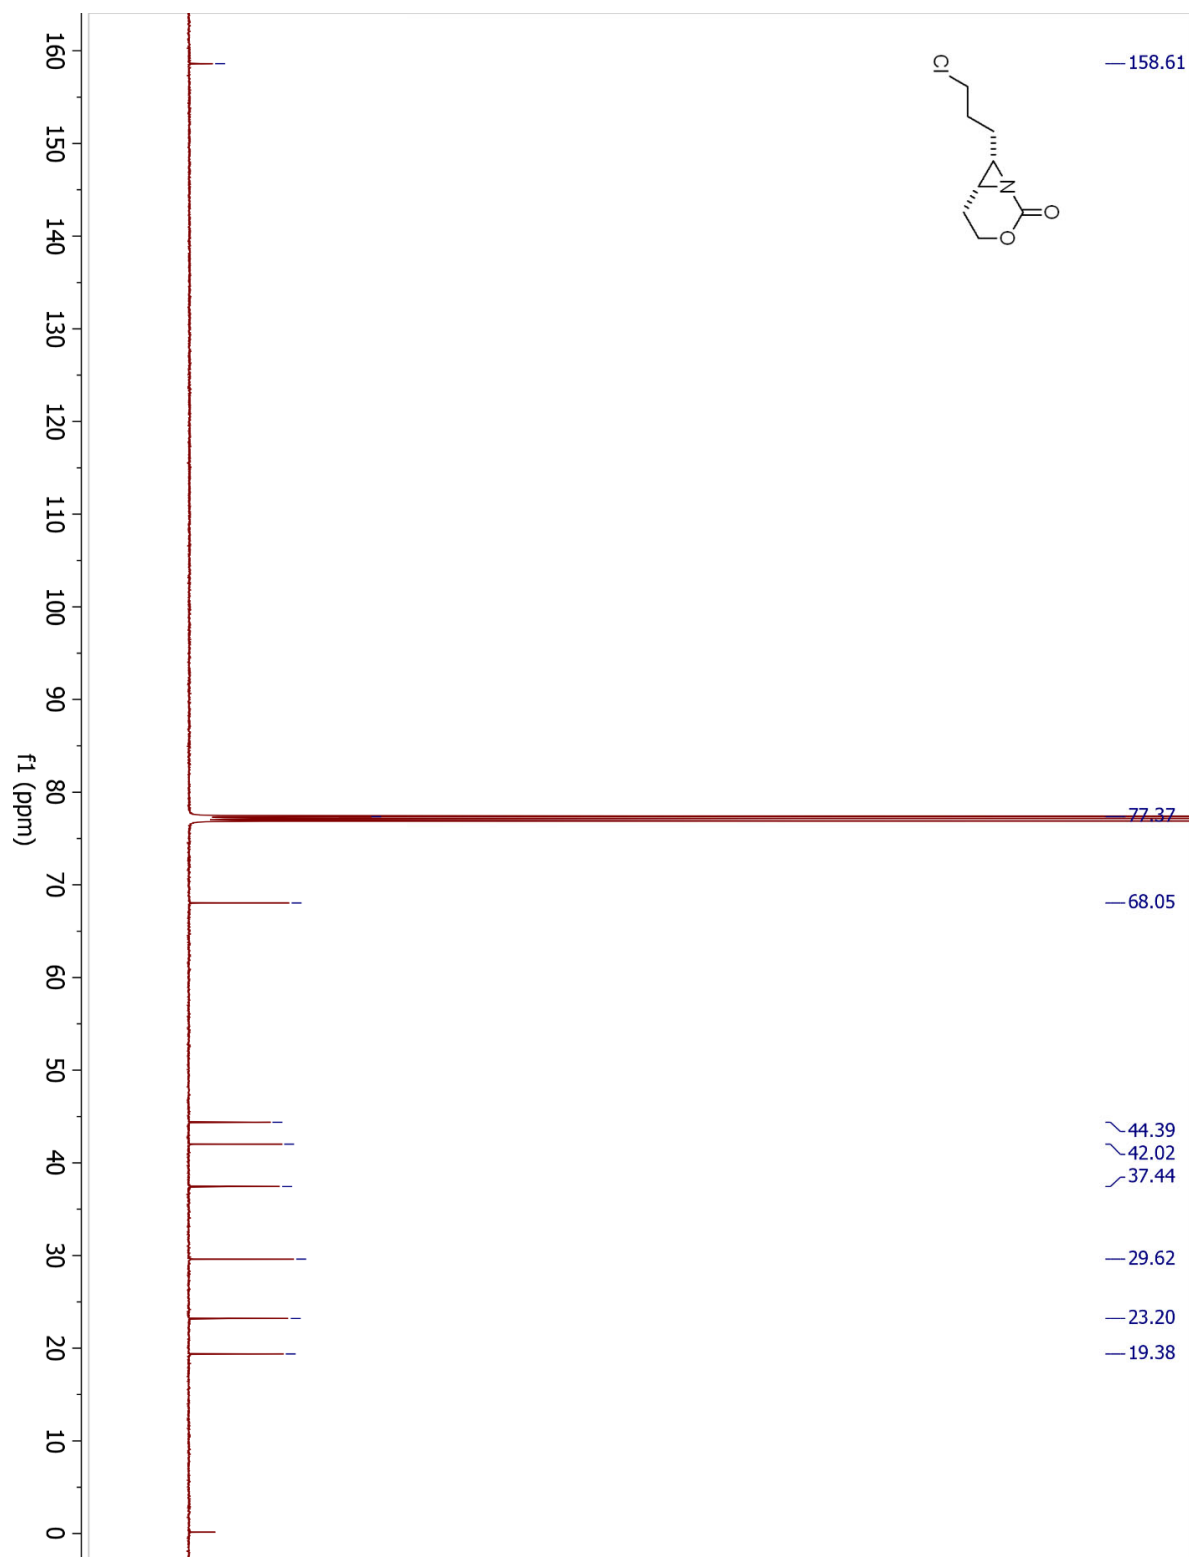

Supplementary Figure 30.  $^1\text{H}$  NMR (500 MHz,  $\text{CDCl}_3$ ) for compound **2g**

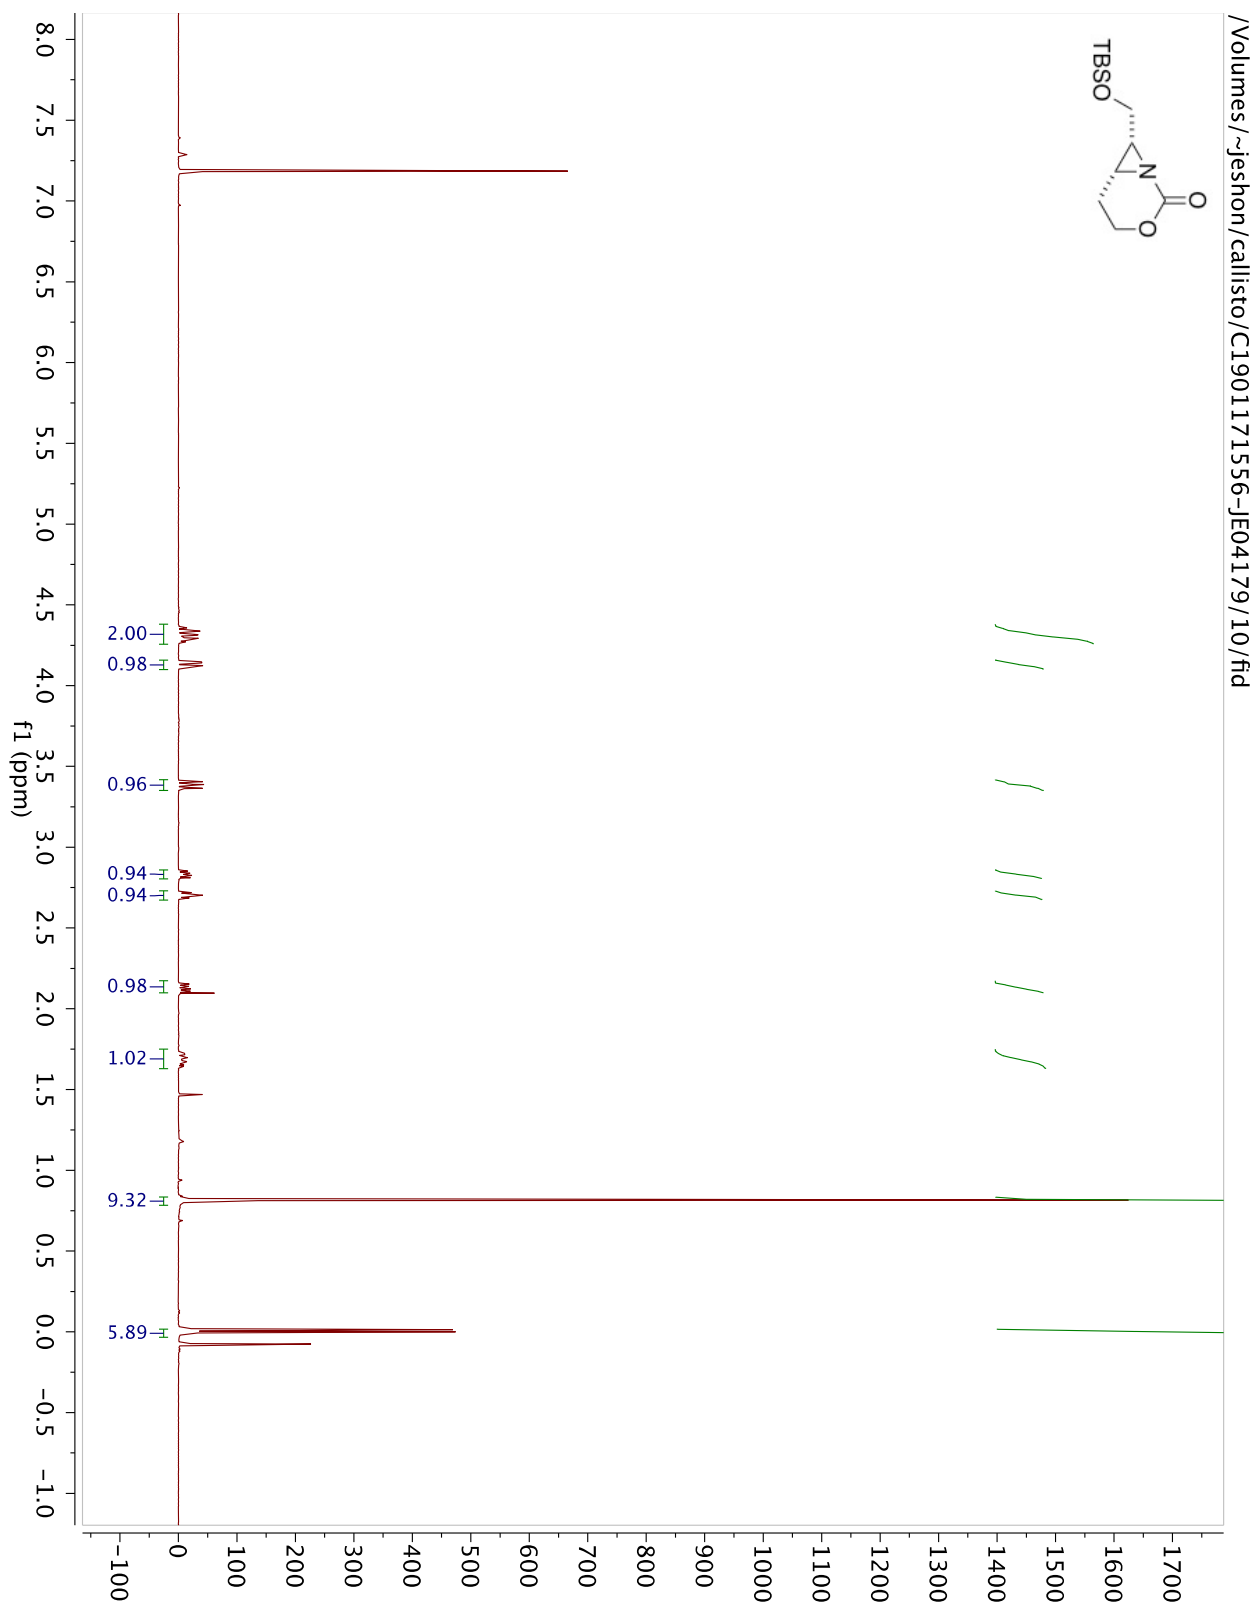

Supplementary Figure 31.  $^{13}\text{C}$  NMR (126 MHz,  $\text{CDCl}_3$ ) for compound **2g**

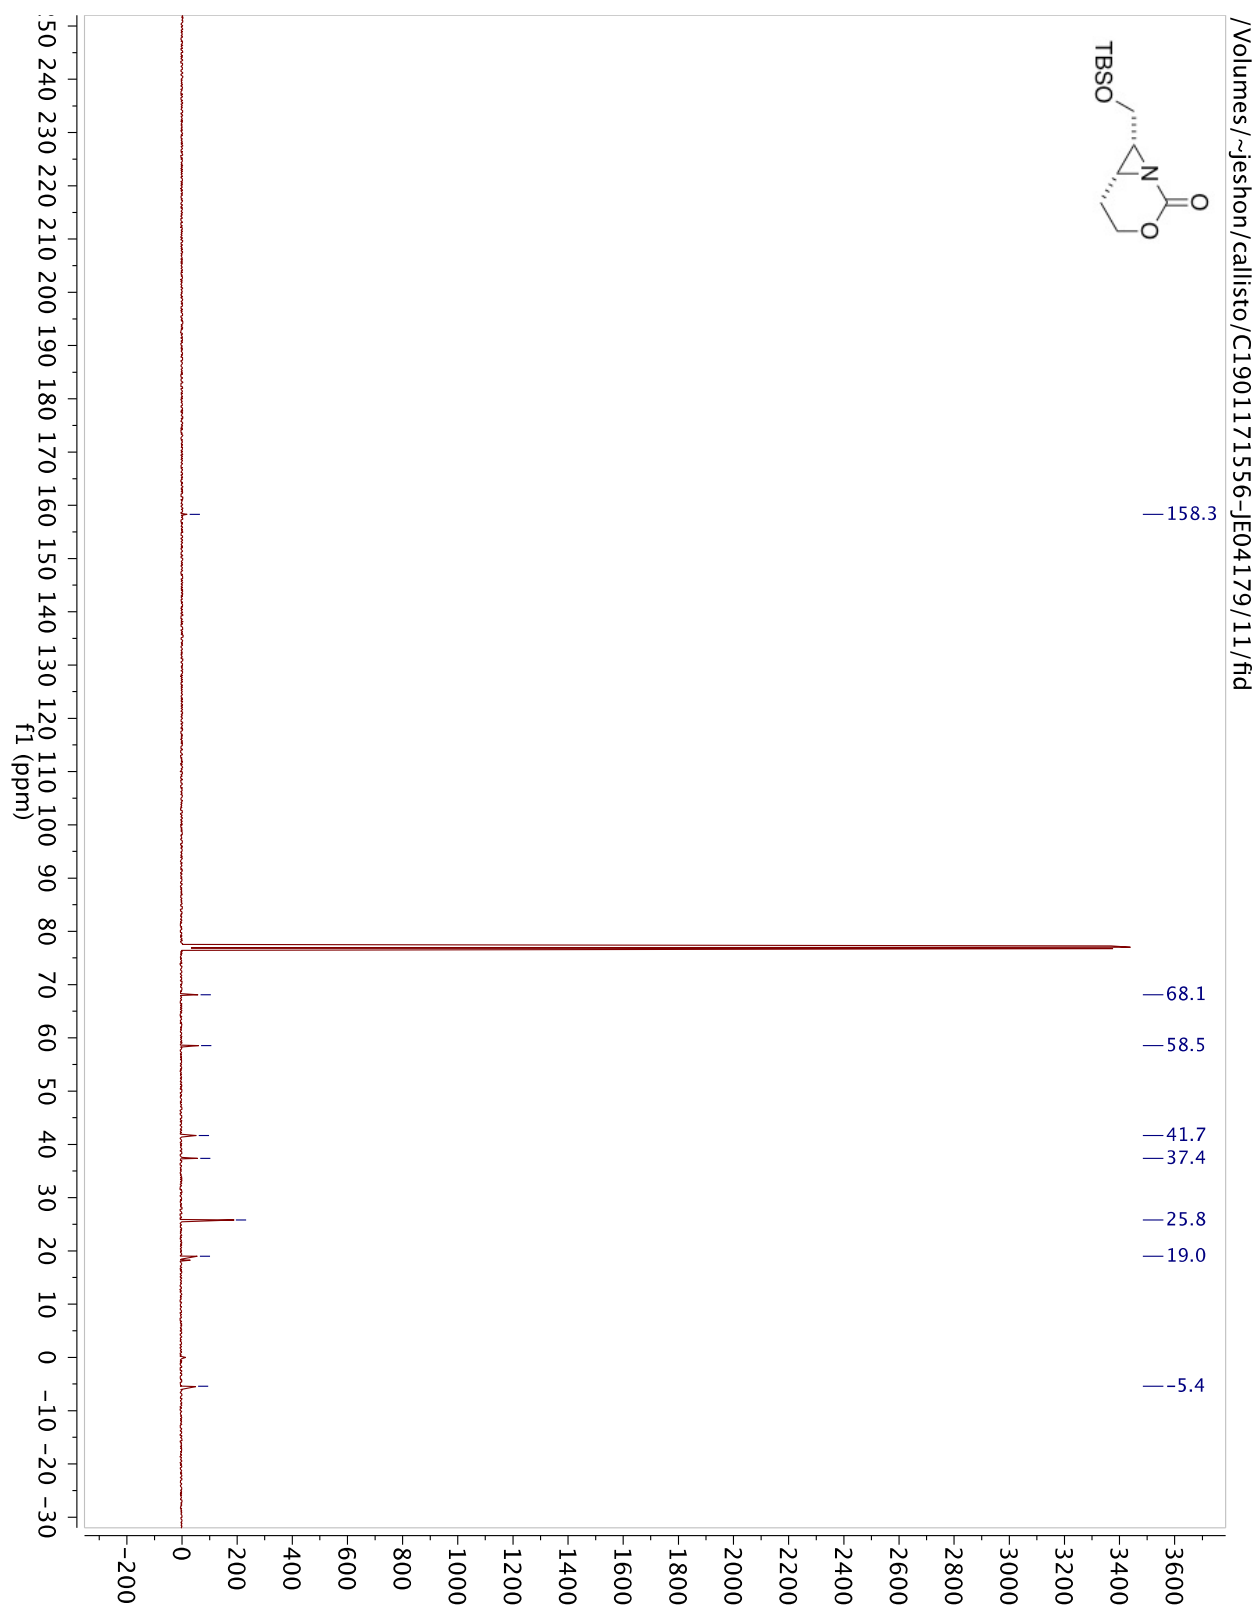

Supplementary Figure 32.  $^1\text{H}$  NMR (500 MHz,  $\text{CDCl}_3$ ) for compound **2h**

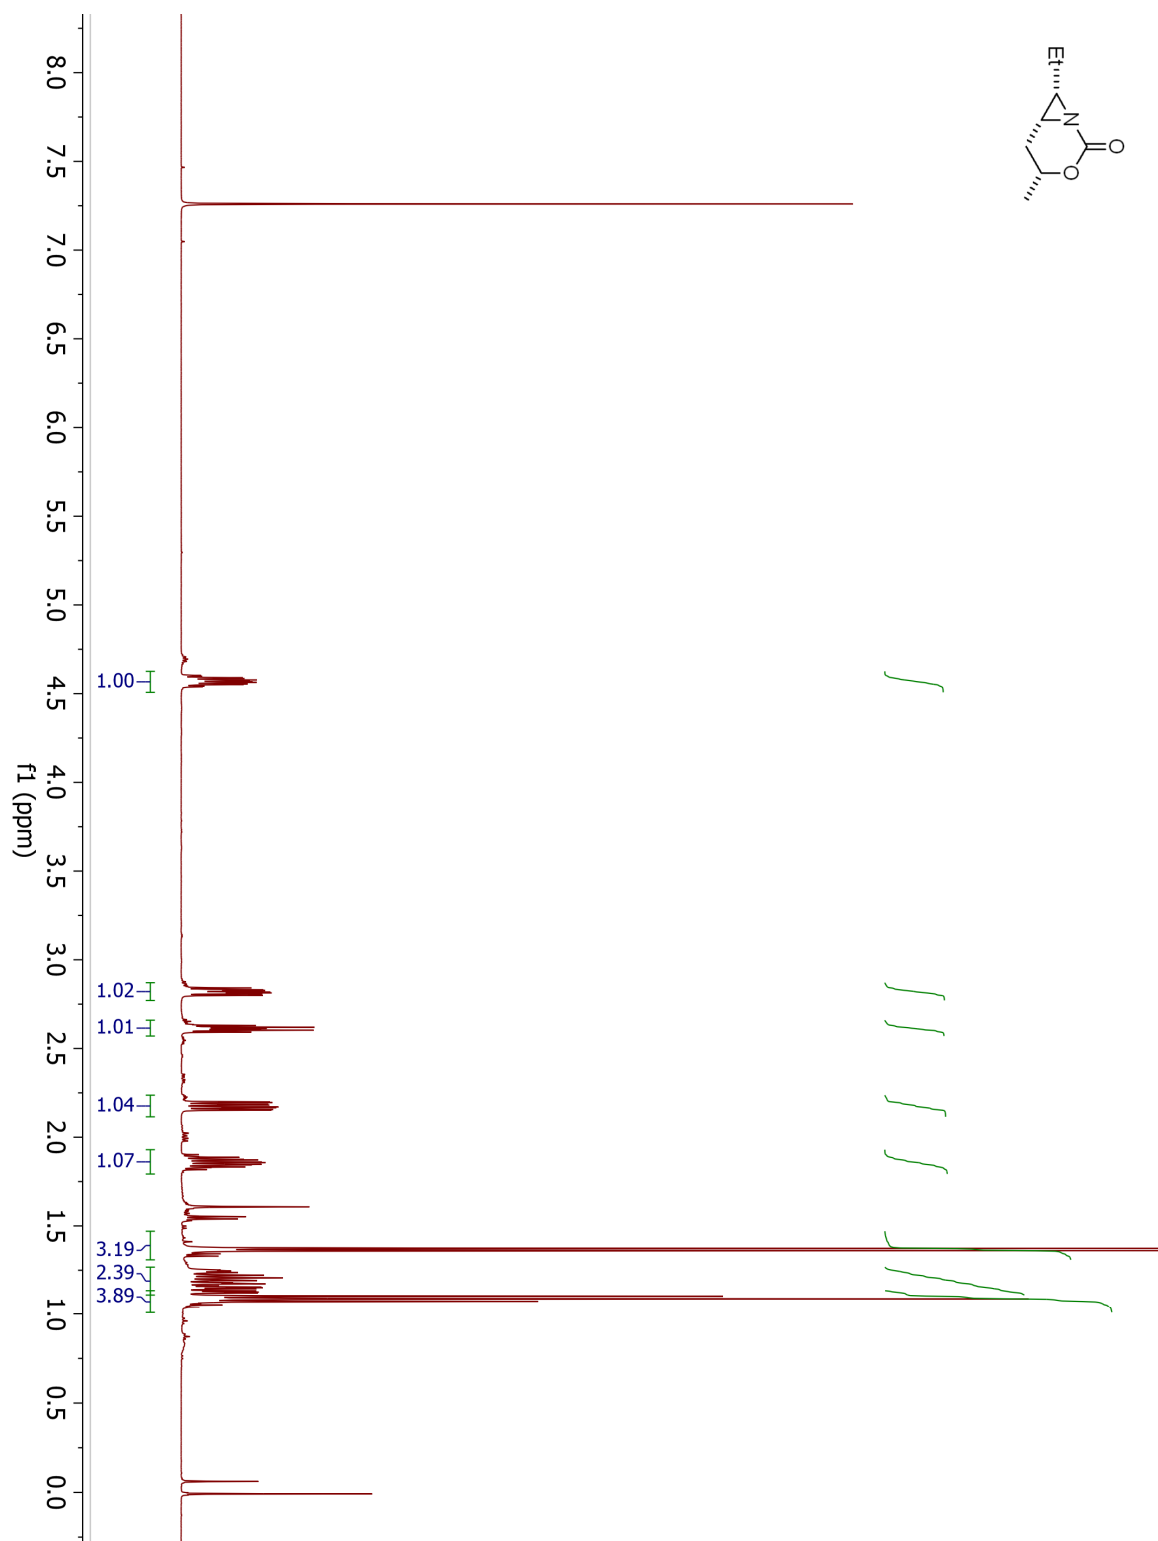

Supplementary Figure 33.  $^{13}\text{C}$  NMR (126 MHz,  $\text{CDCl}_3$ ) for compound **2h**

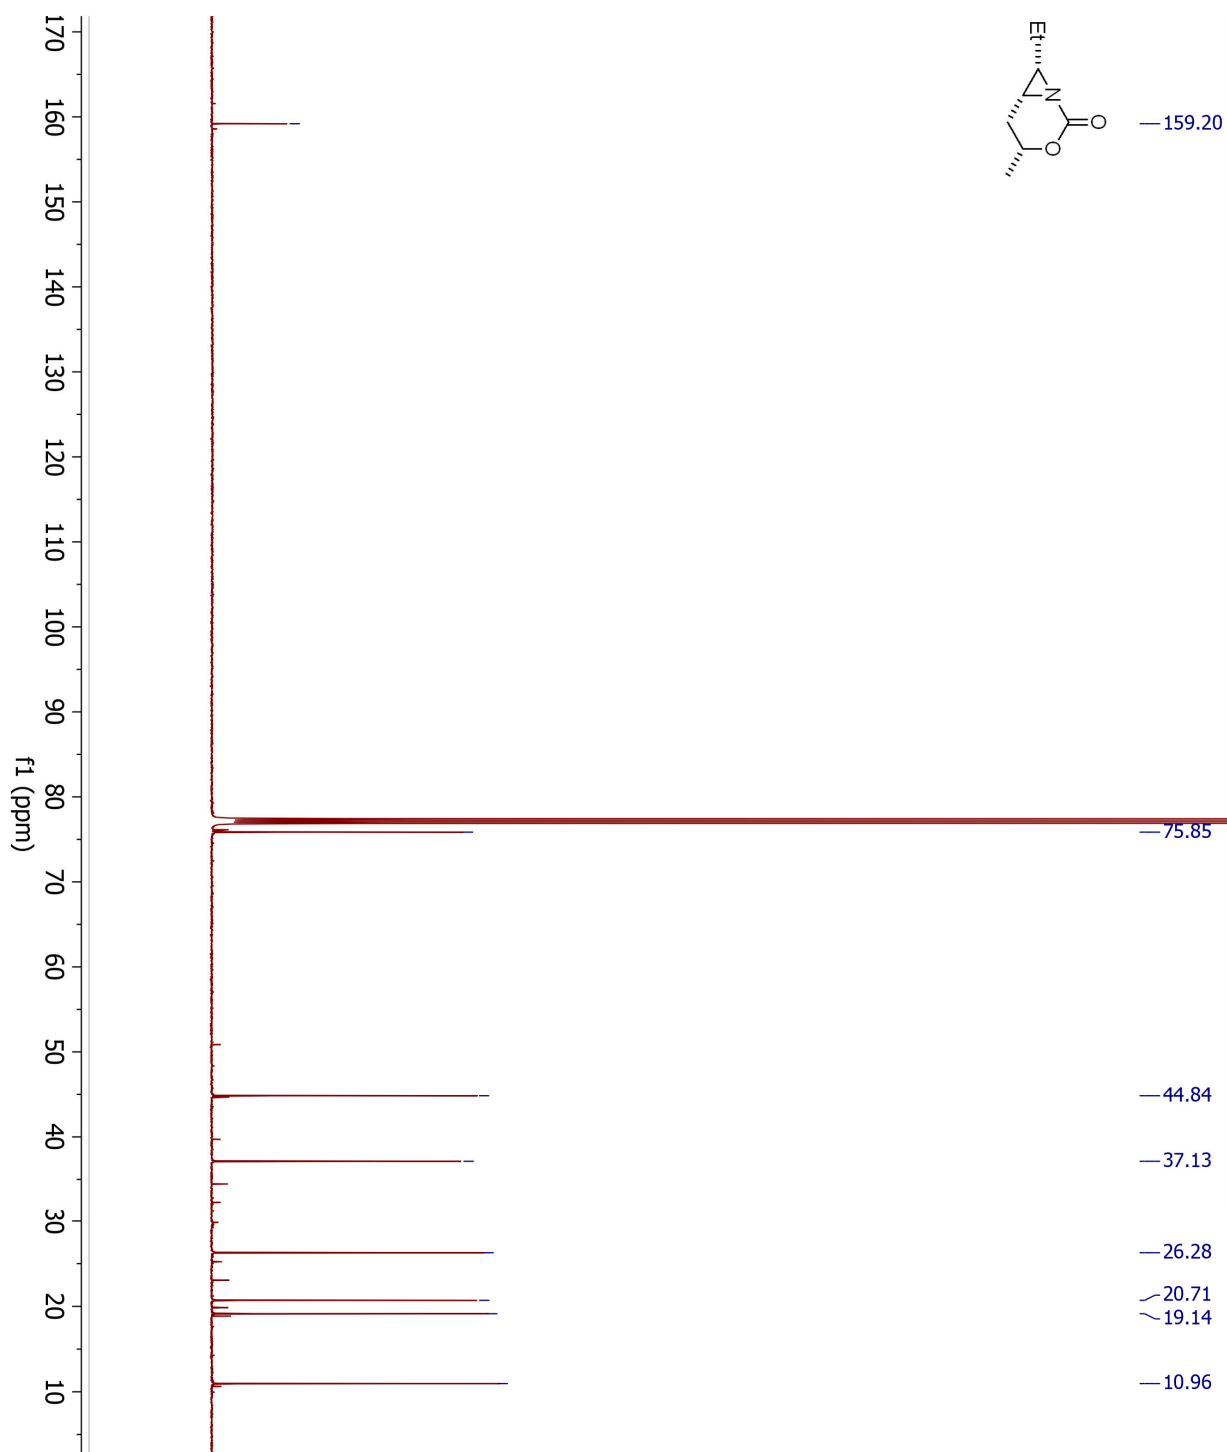

Supplementary Figure 34.  $^1\text{H}$  NMR (500 MHz,  $\text{CDCl}_3$ ) for compound **2i**

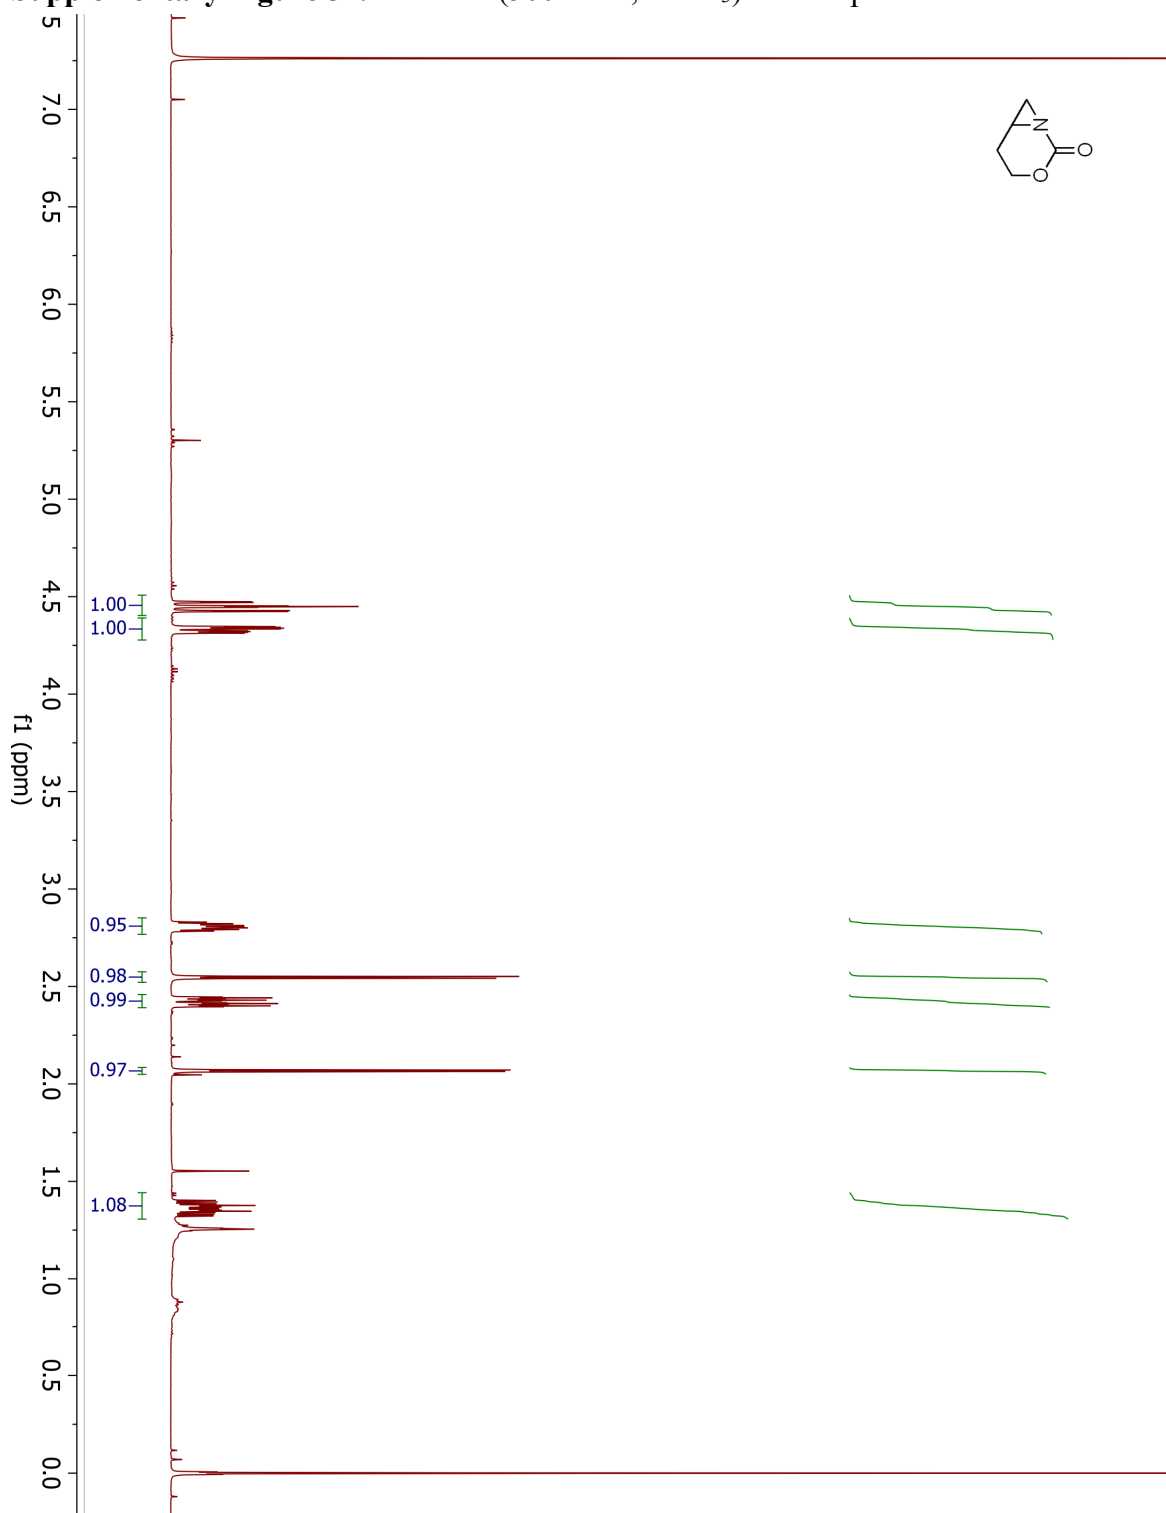

Supplementary Figure 35.  $^{13}\text{C}$  NMR (500 MHz,  $\text{CDCl}_3$ ) for compound **2i**

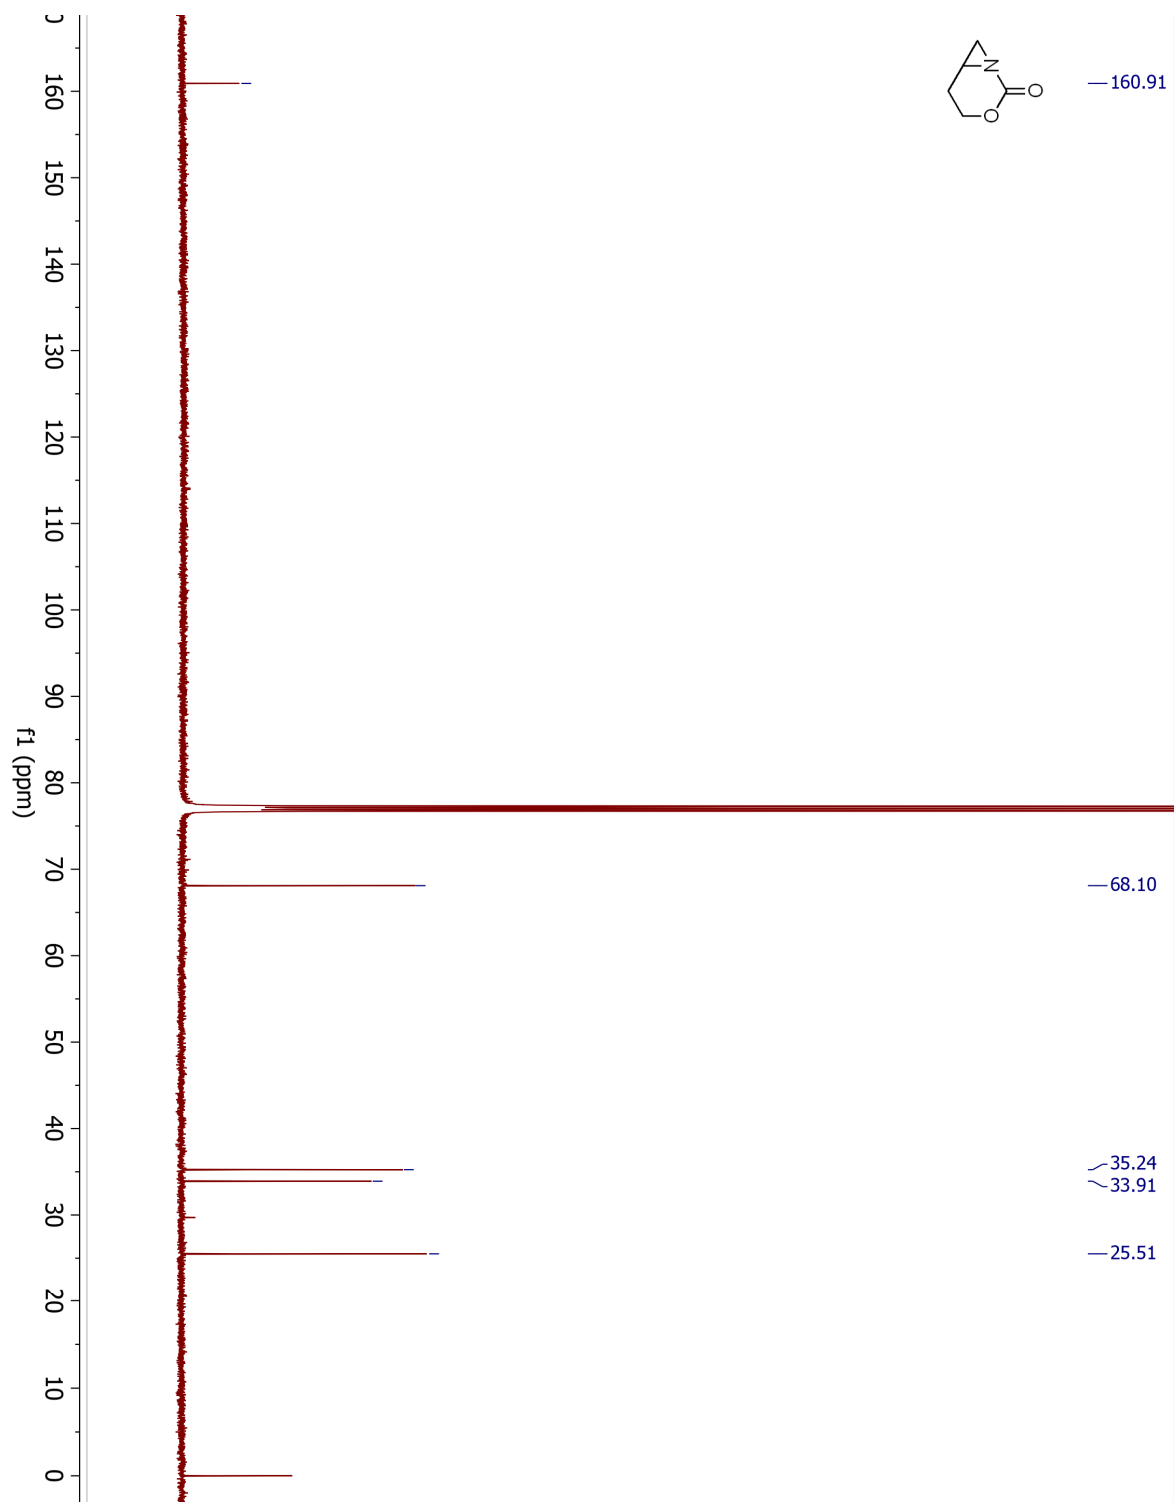

Supplementary Figure 36.  $^1\text{H}$  NMR (500 MHz,  $\text{CDCl}_3$ ) for compound **3c**

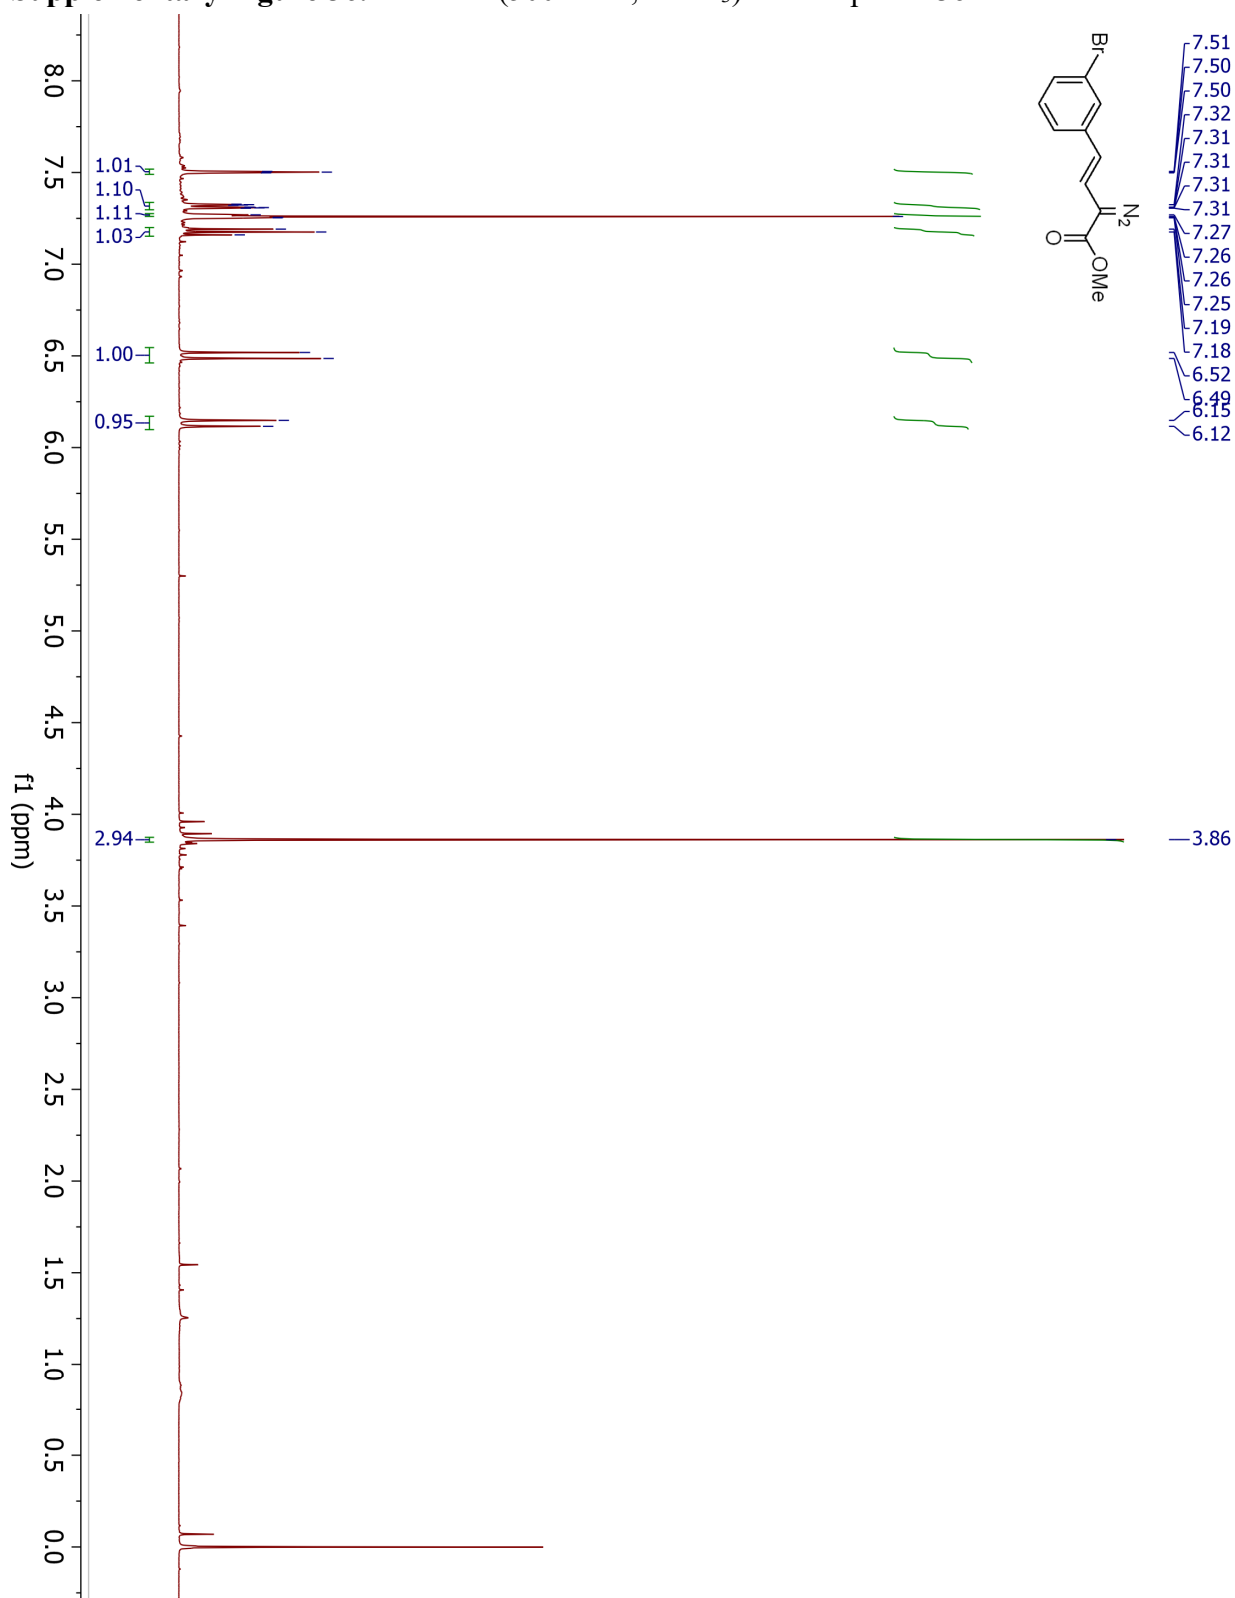

Supplementary Figure 37.  $^{13}\text{C}$  NMR (126 MHz,  $\text{CDCl}_3$ ) for compound **3c**

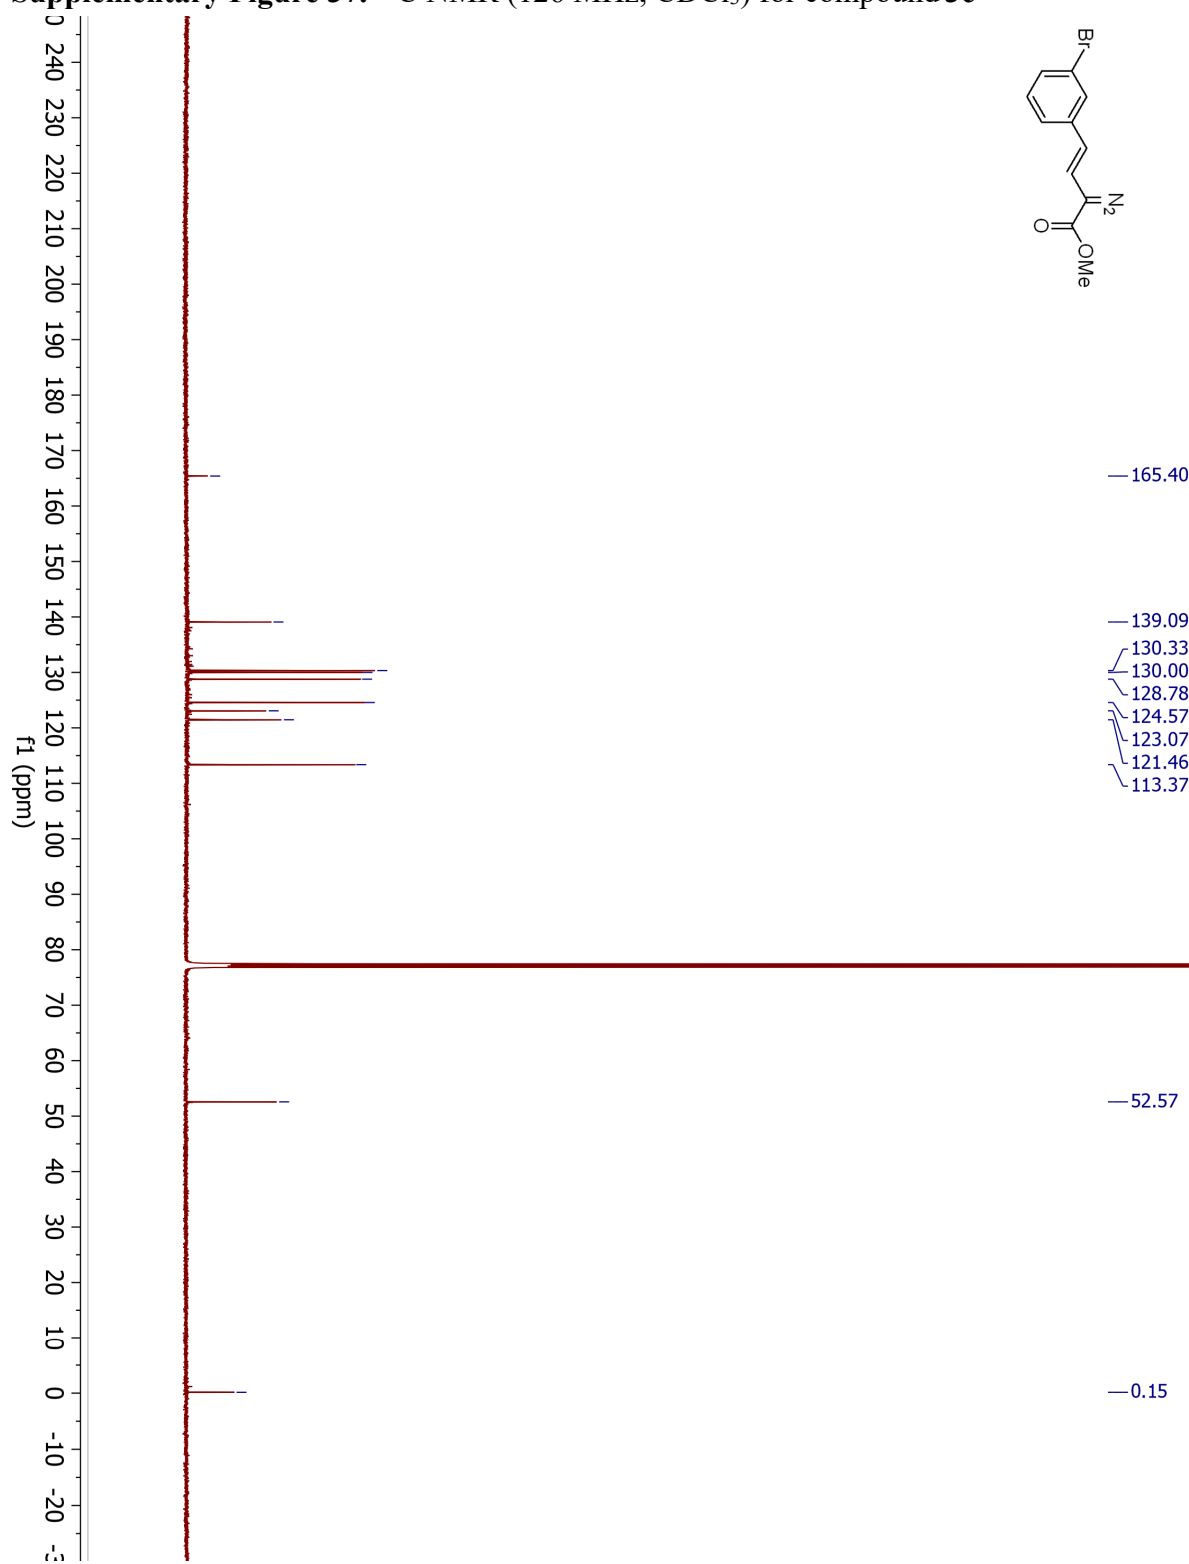

Supplementary Figure 38.  $^1\text{H}$  NMR (500 MHz,  $\text{CDCl}_3$ ) for compound **3g**

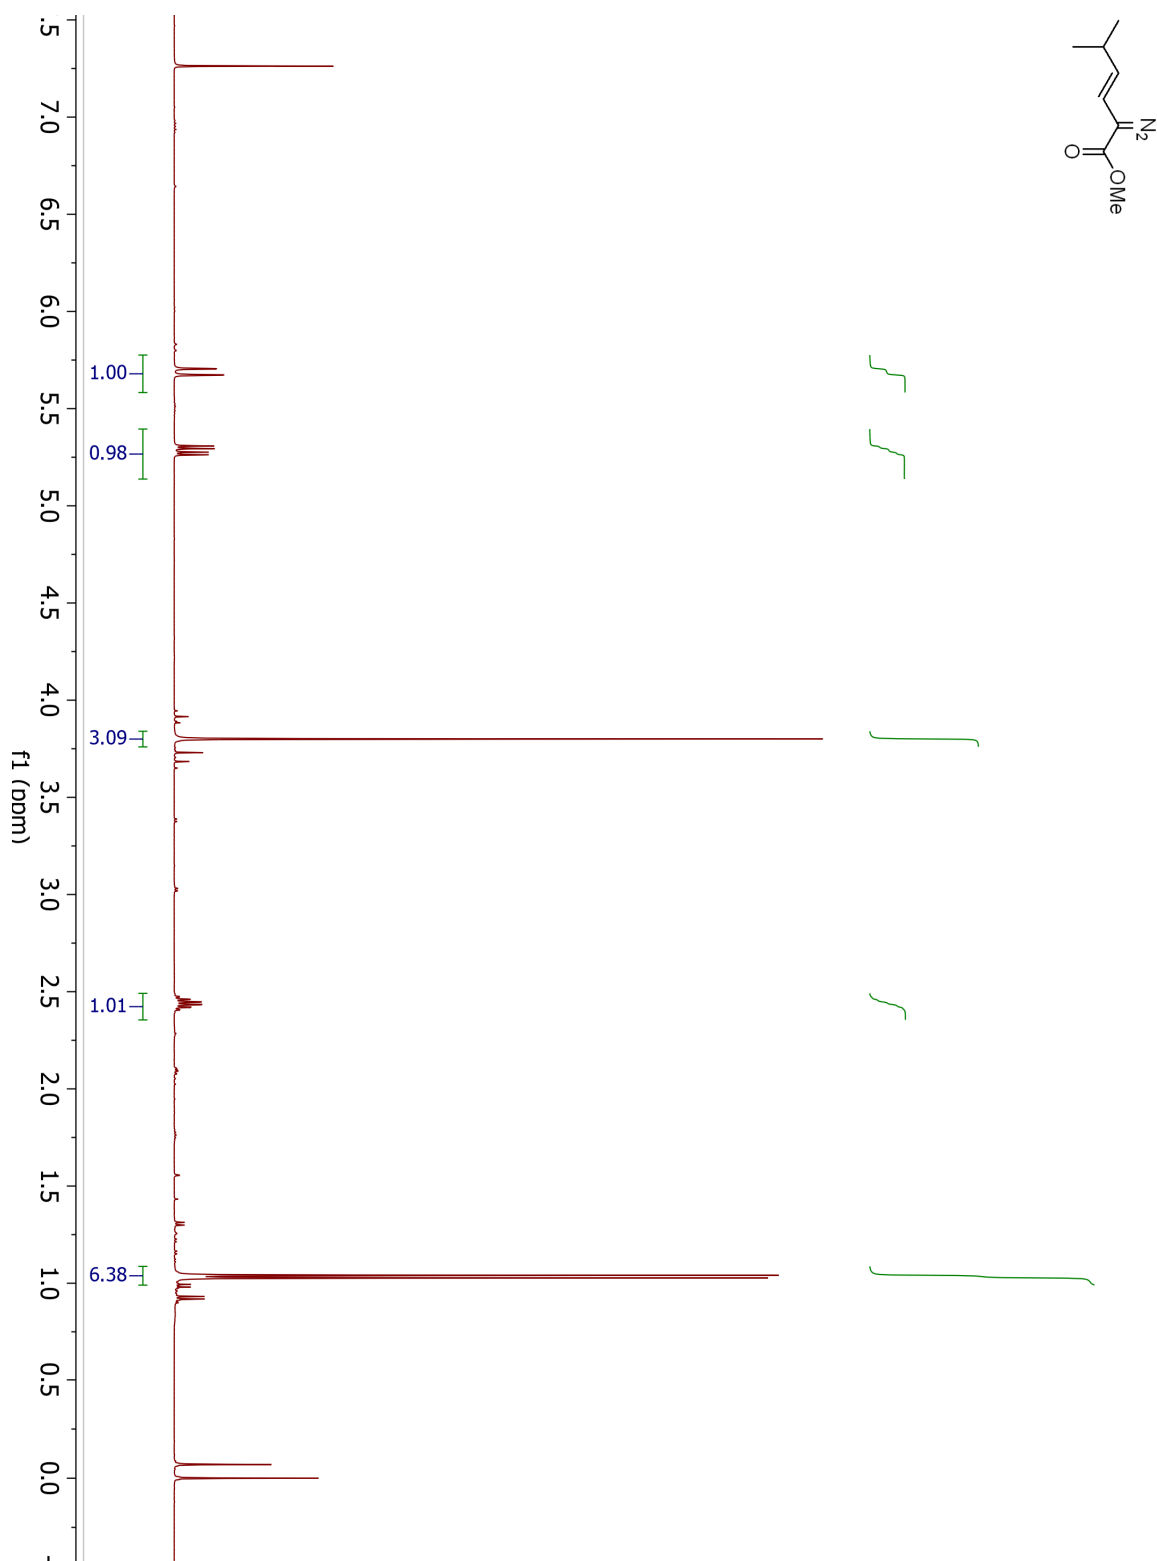

Supplementary Figure 39.  $^{13}\text{C}$  NMR (126 MHz,  $\text{CDCl}_3$ ) for compound **3g**

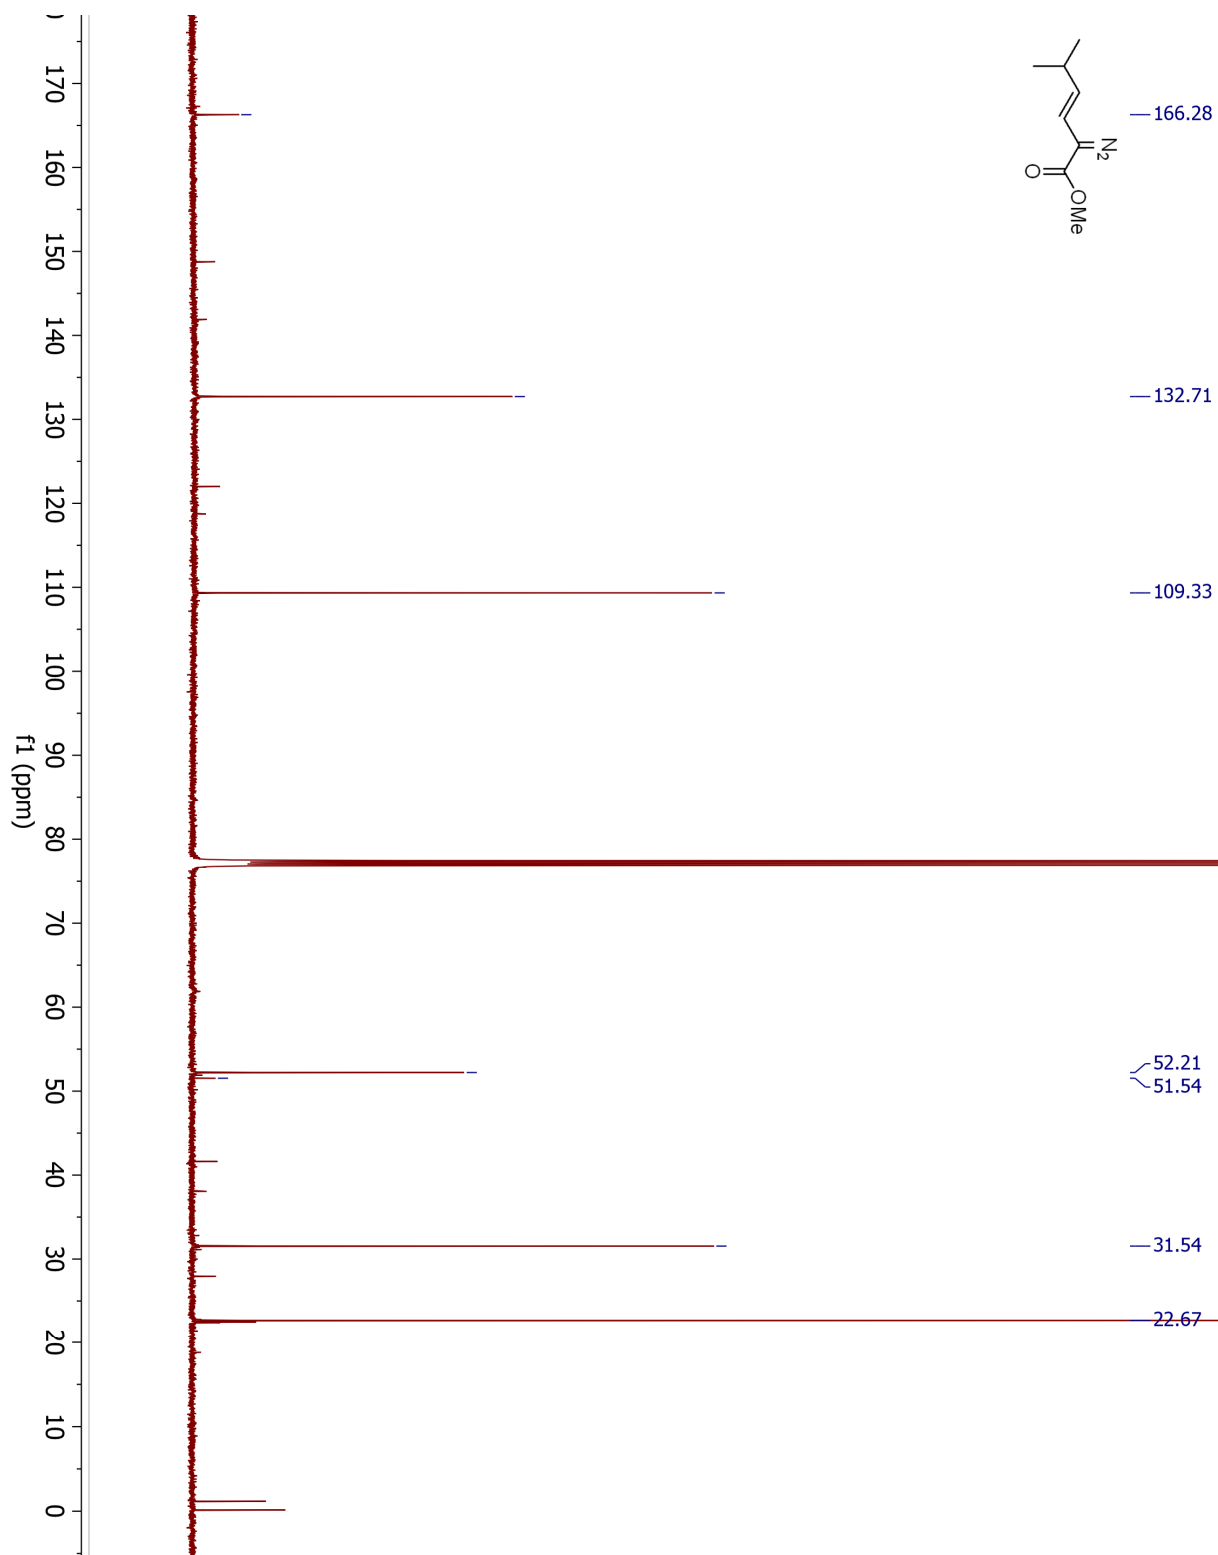

Supplementary Figure 40.  $^1\text{H}$  NMR (500 MHz,  $\text{CDCl}_3$ ) for compound 4aa

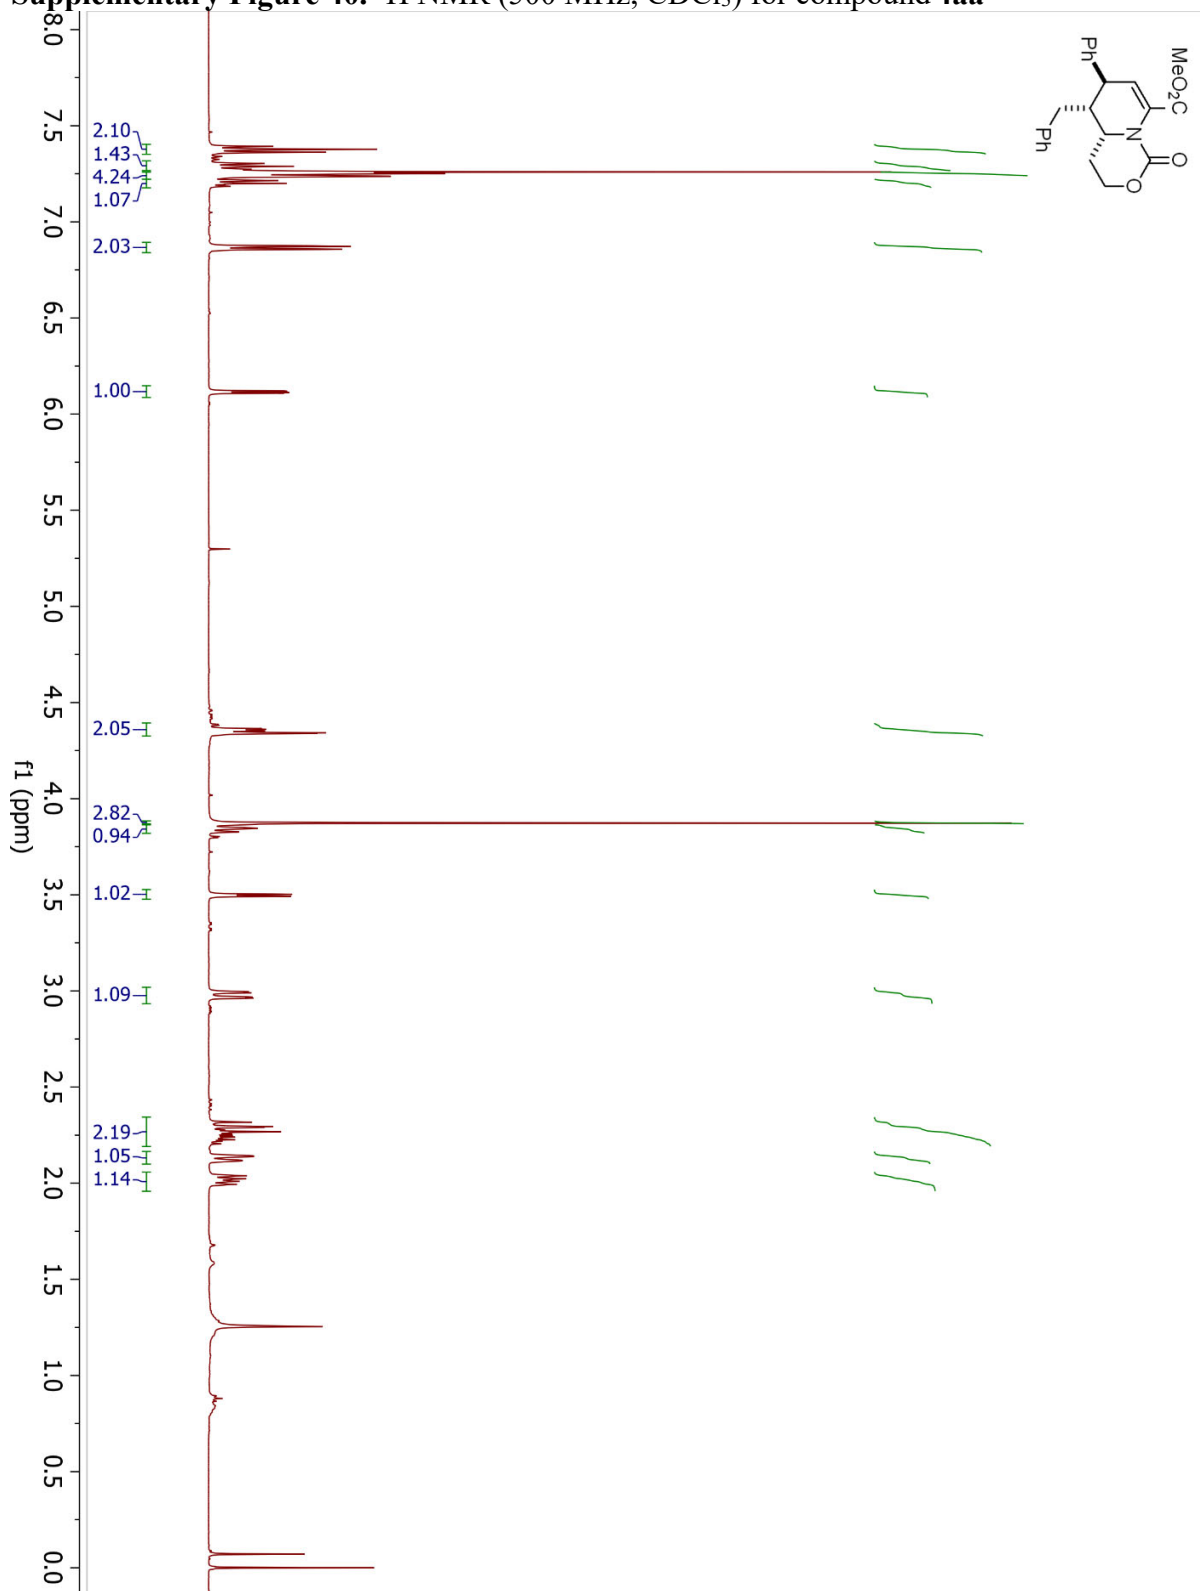

**Supplementary Figure 41.**  $^{13}\text{C}$  NMR (126 MHz,  $\text{CDCl}_3$ ) for compound **4aa**

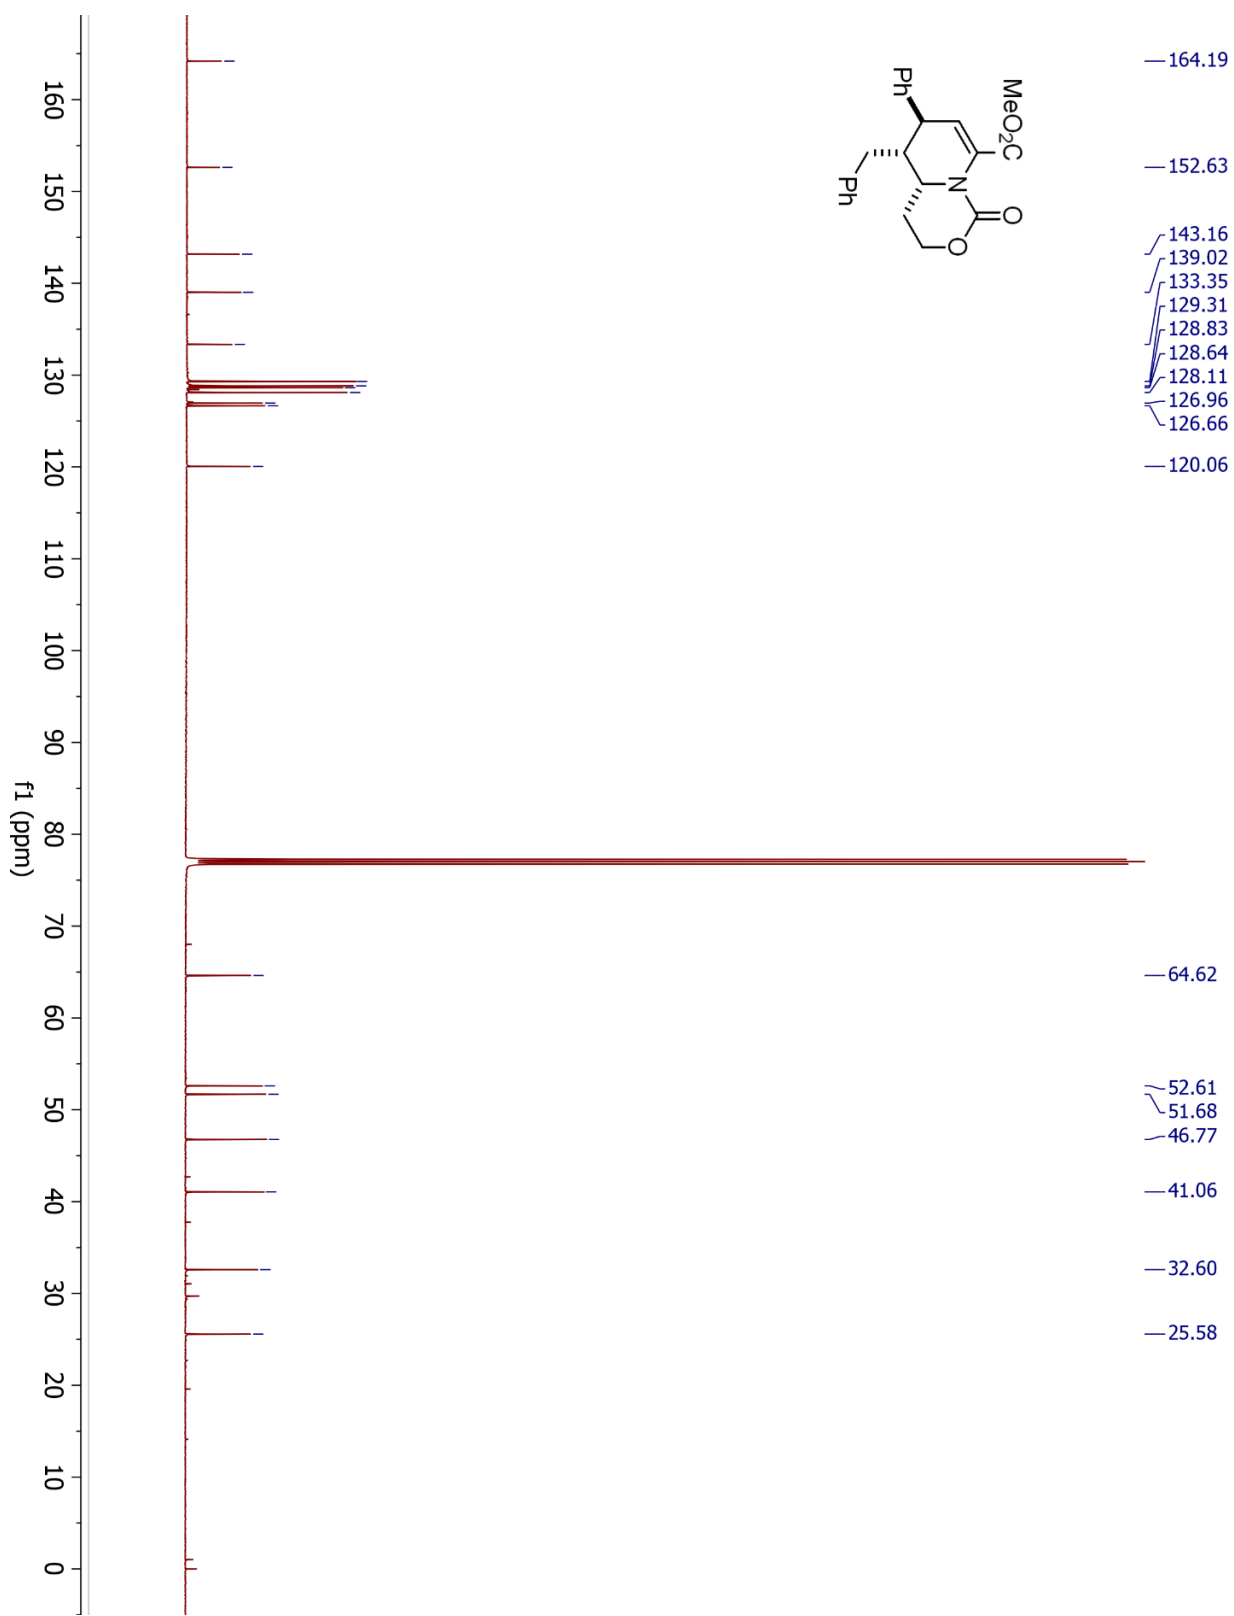

Supplementary Figure 42.  $^1\text{H}$  NMR (500 MHz,  $\text{CDCl}_3$ ) for compound **4ba**

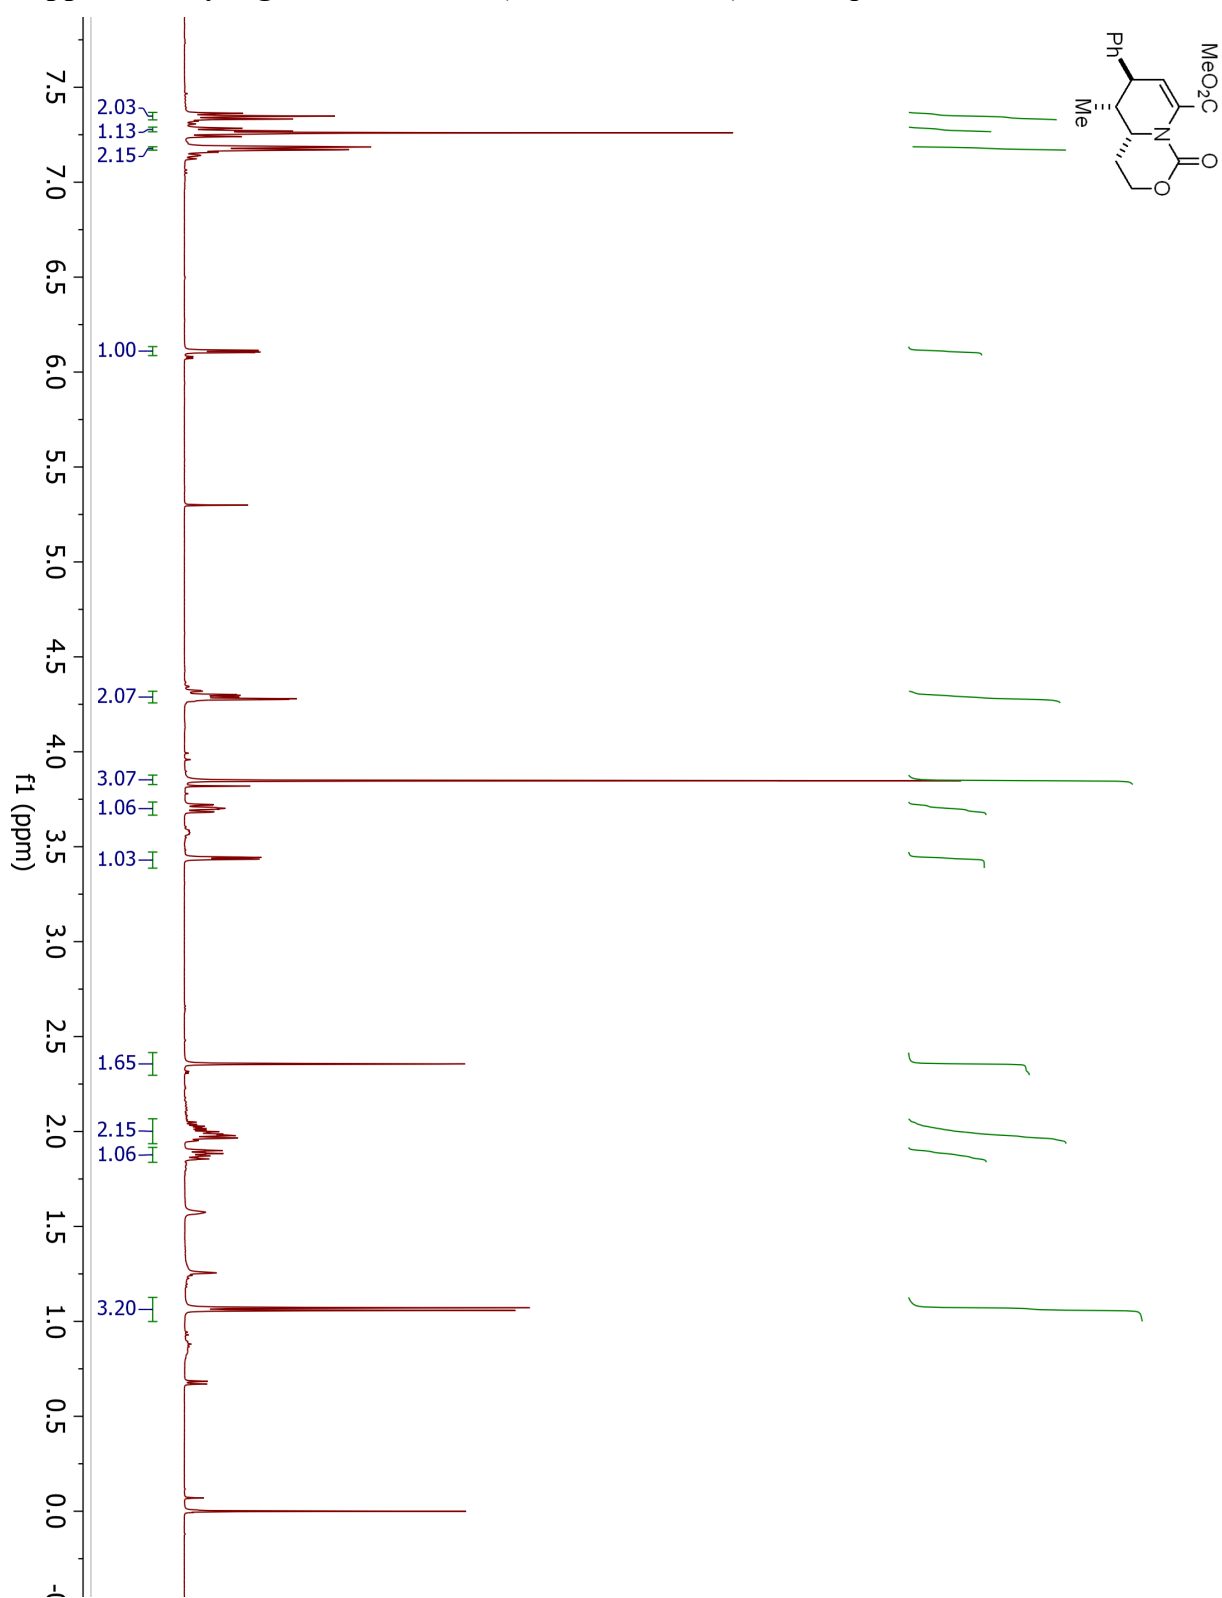

Supplementary Figure 43.  $^{13}\text{C}$  NMR (126 MHz,  $\text{CDCl}_3$ ) for compound **4ba**

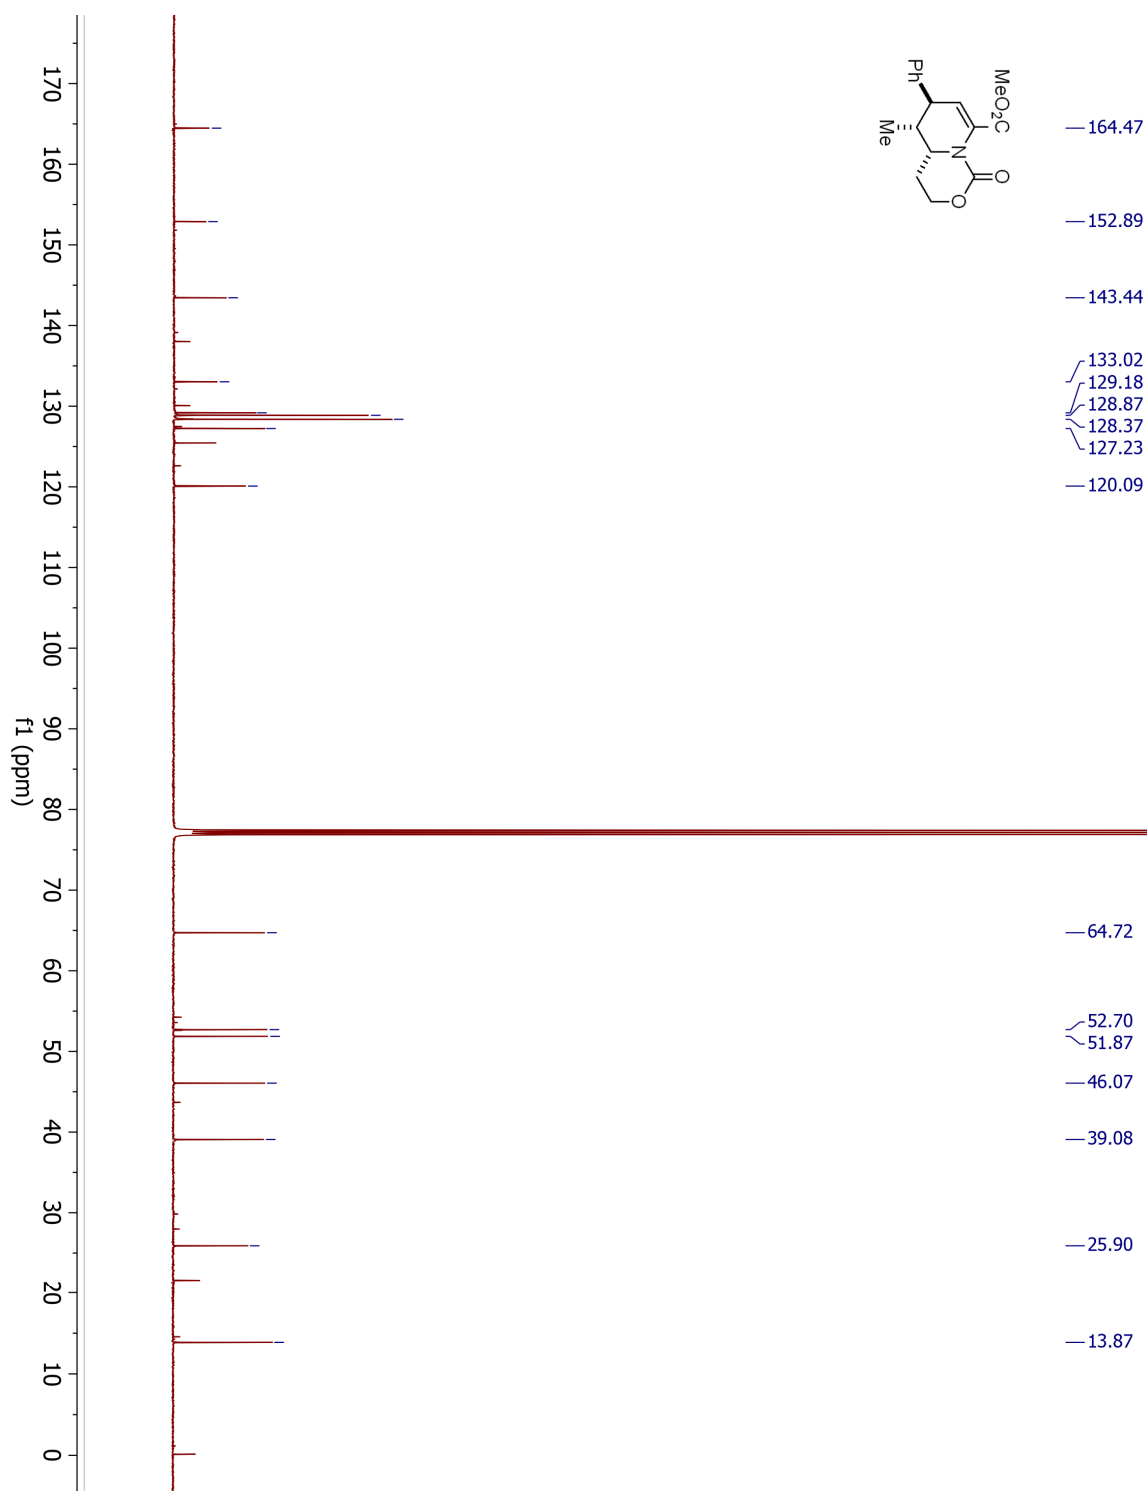

Supplementary Figure 44.  $^1\text{H}$  NMR (500 MHz,  $\text{CDCl}_3$ ) for compound **4ca**

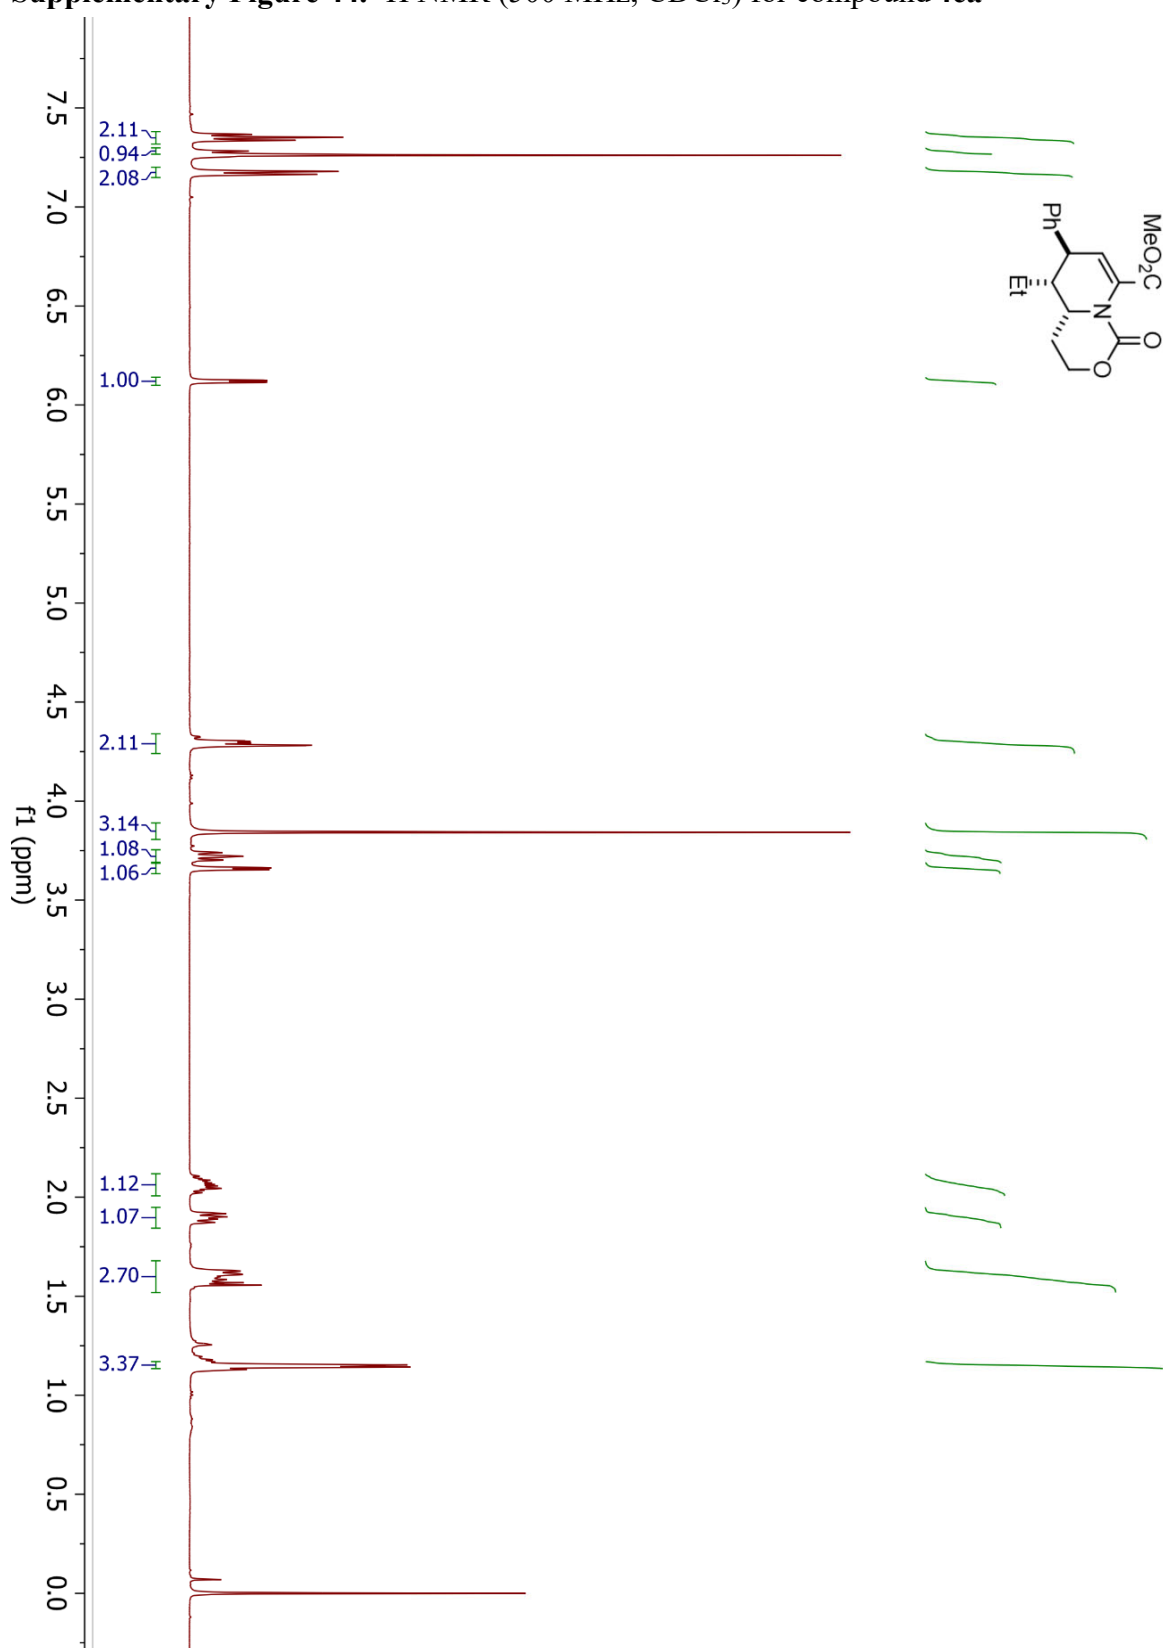

**Supplementary Figure 45.**  $^{13}\text{C}$  NMR (126 MHz,  $\text{CDCl}_3$ ) for compound **4ca**

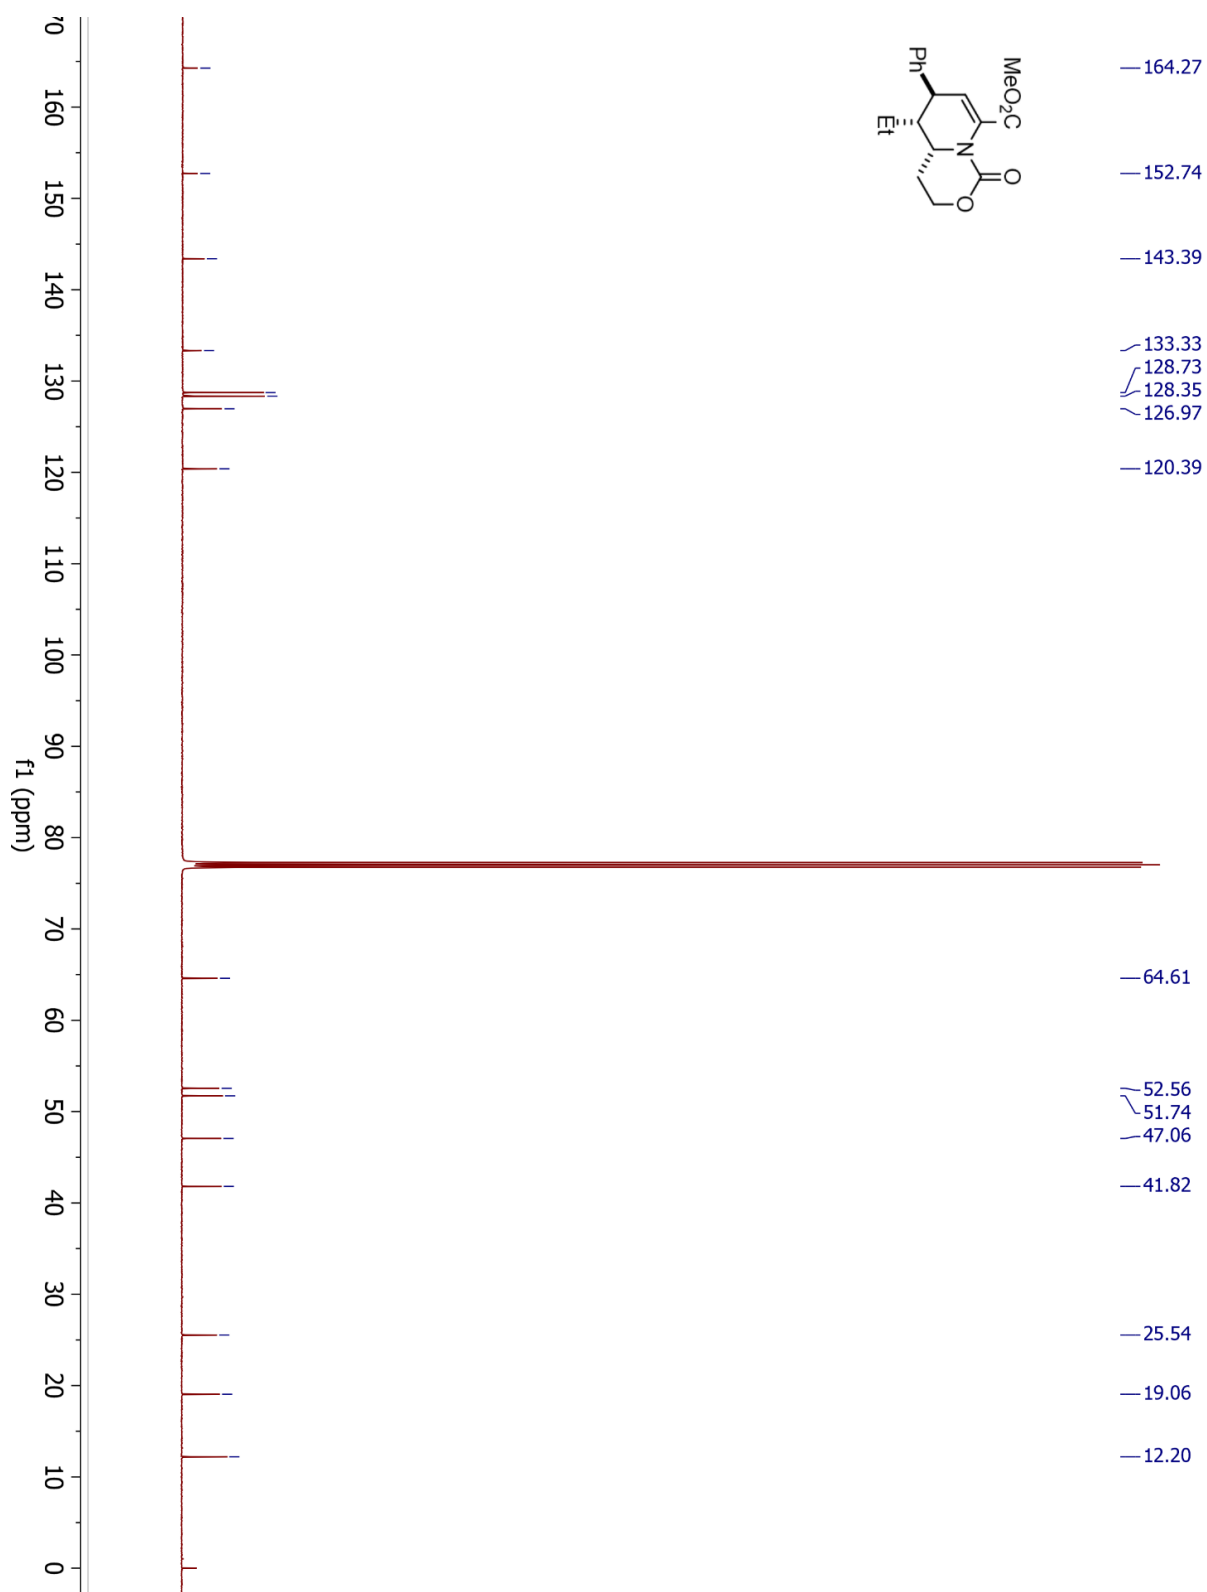

Supplementary Figure 46.  $^1\text{H}$  NMR (500 MHz,  $\text{CDCl}_3$ ) for compound **4da**

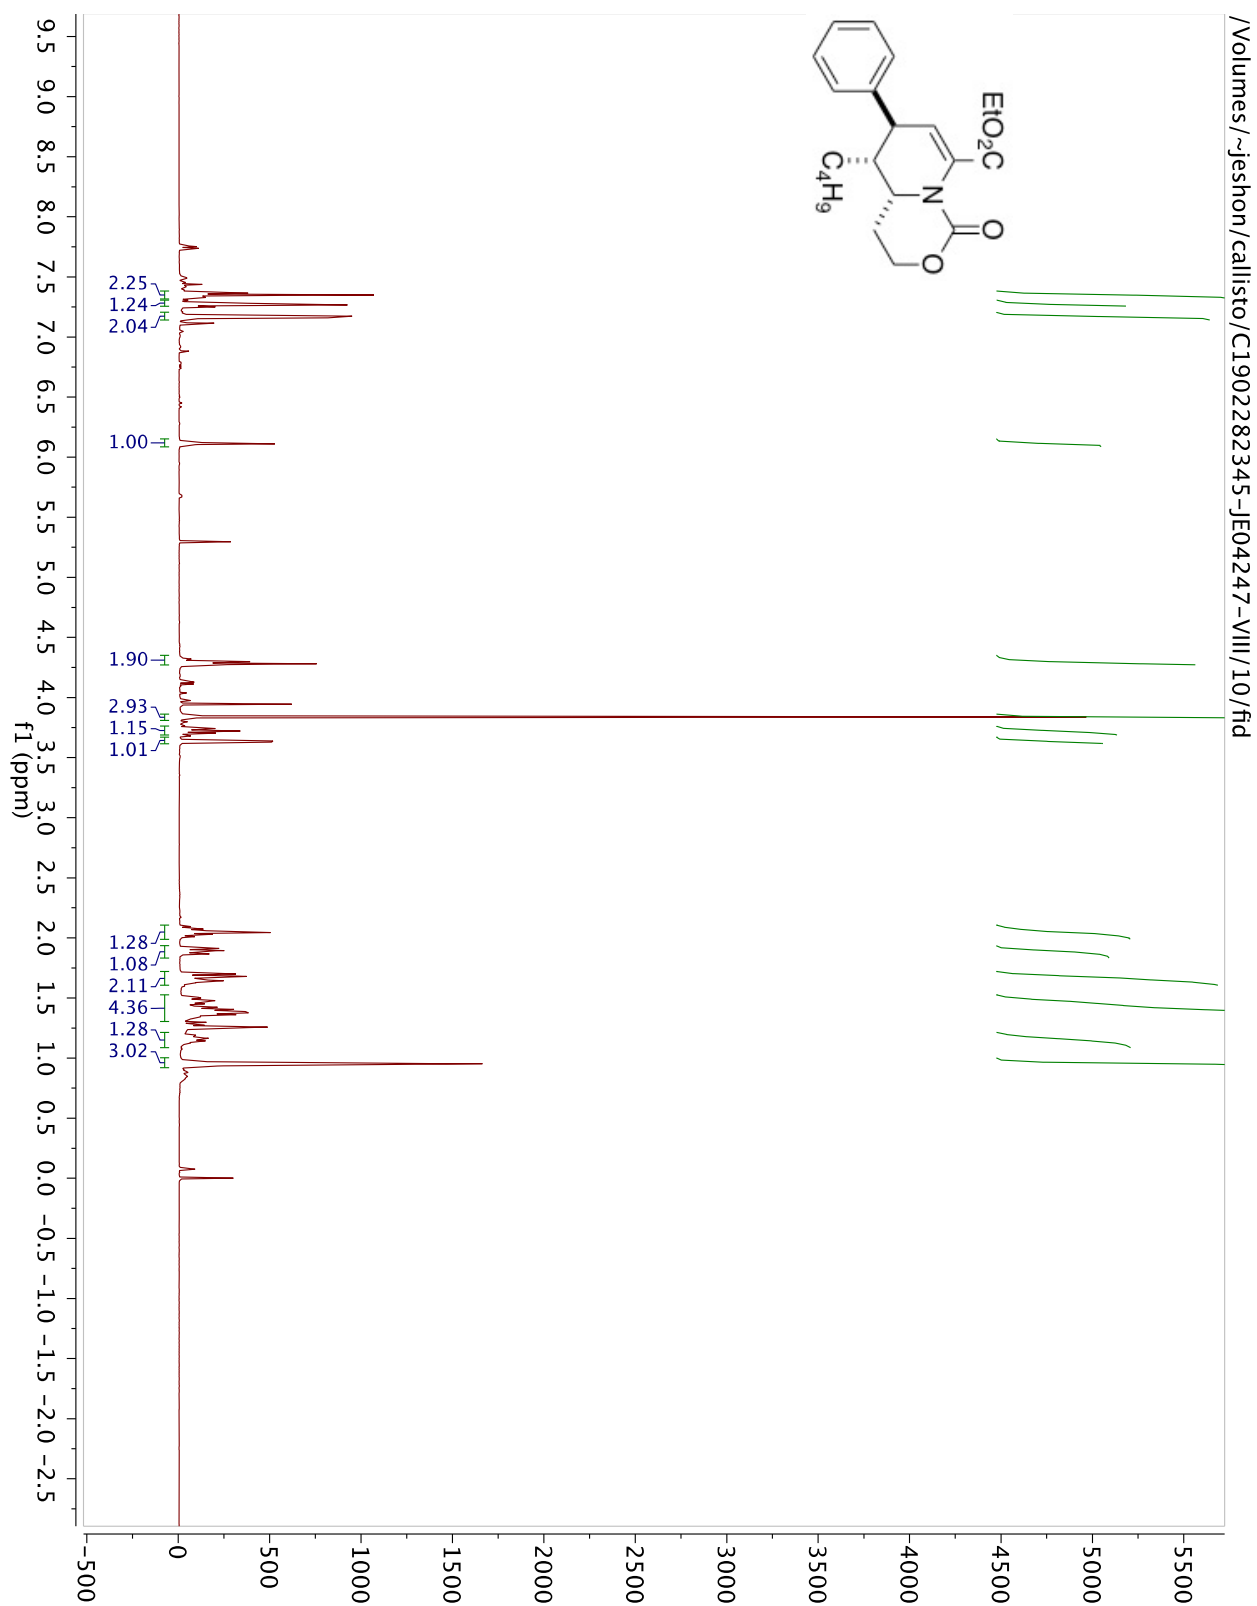

**Supplementary Figure 47.**  $^{13}\text{C}$  NMR (126 MHz,  $\text{CDCl}_3$ ) for compound **4da**

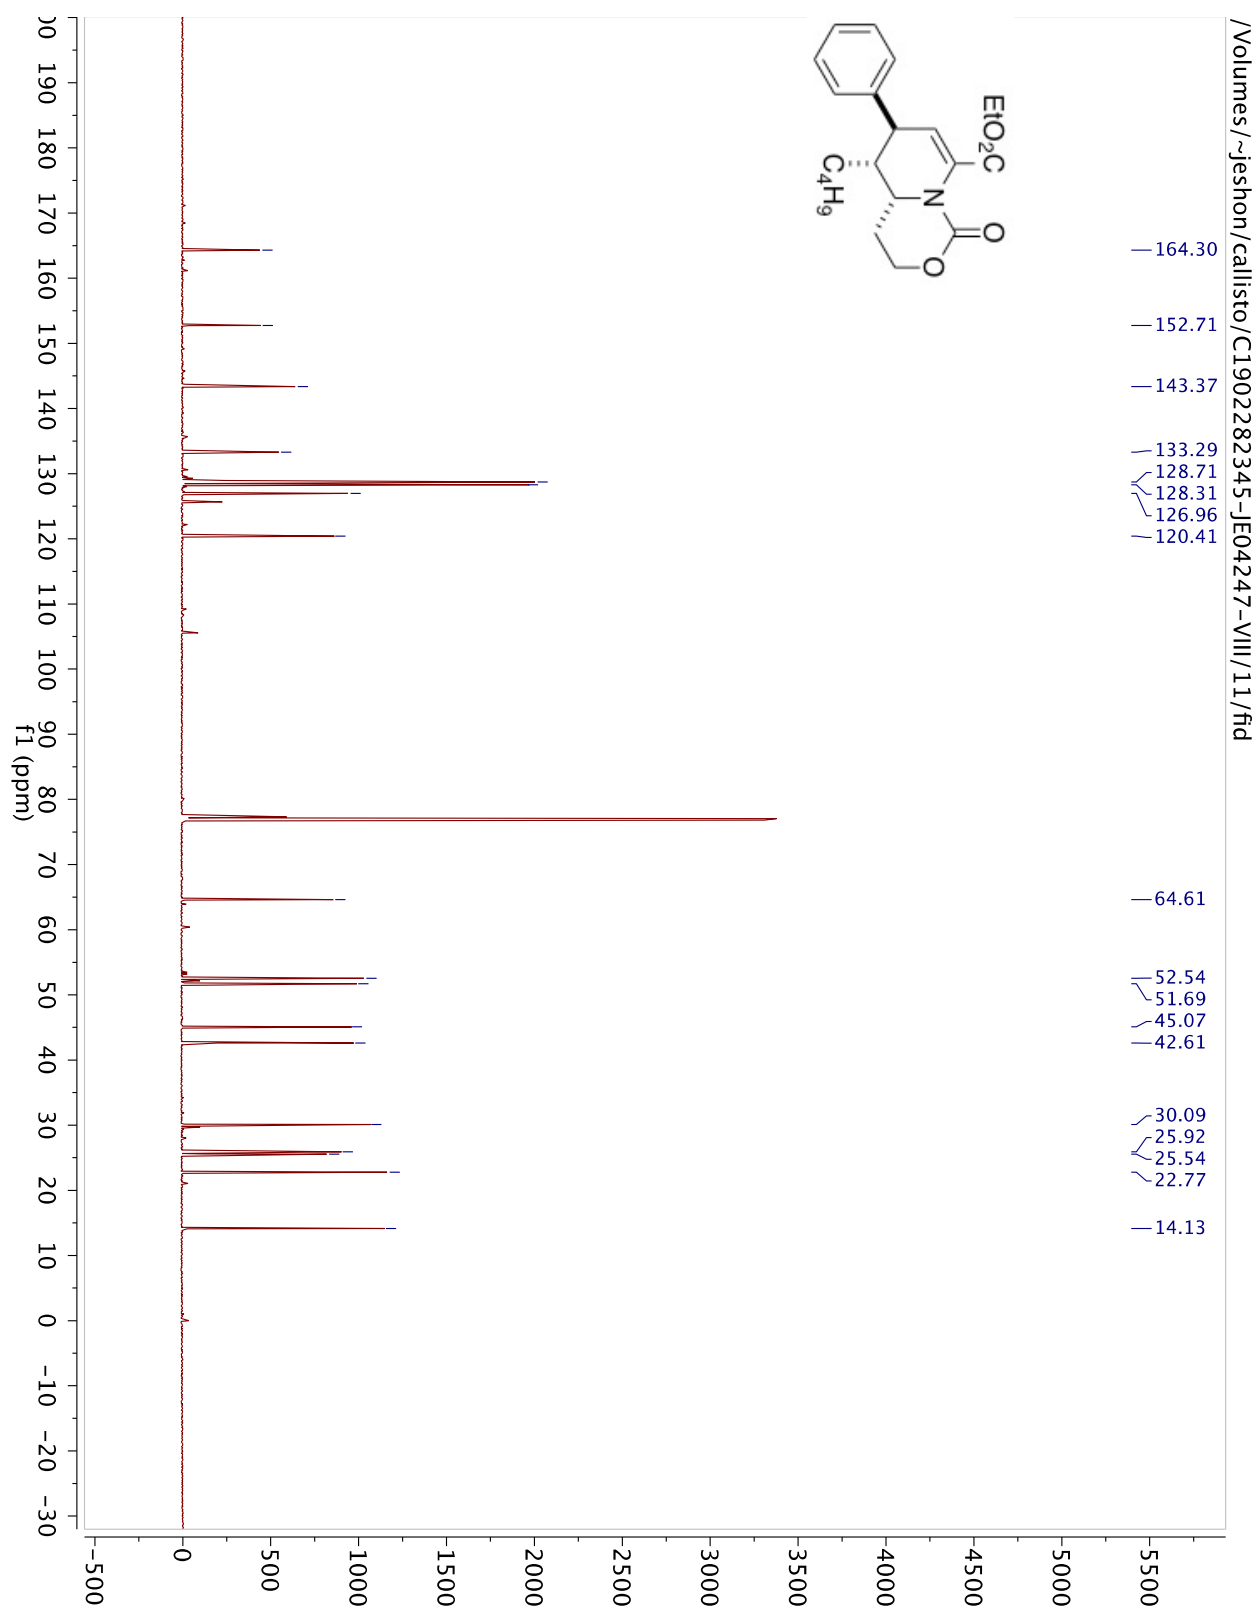

Supplementary Figure 48.  $^1\text{H}$  NMR (500 MHz,  $\text{CDCl}_3$ ) for compound 4ea

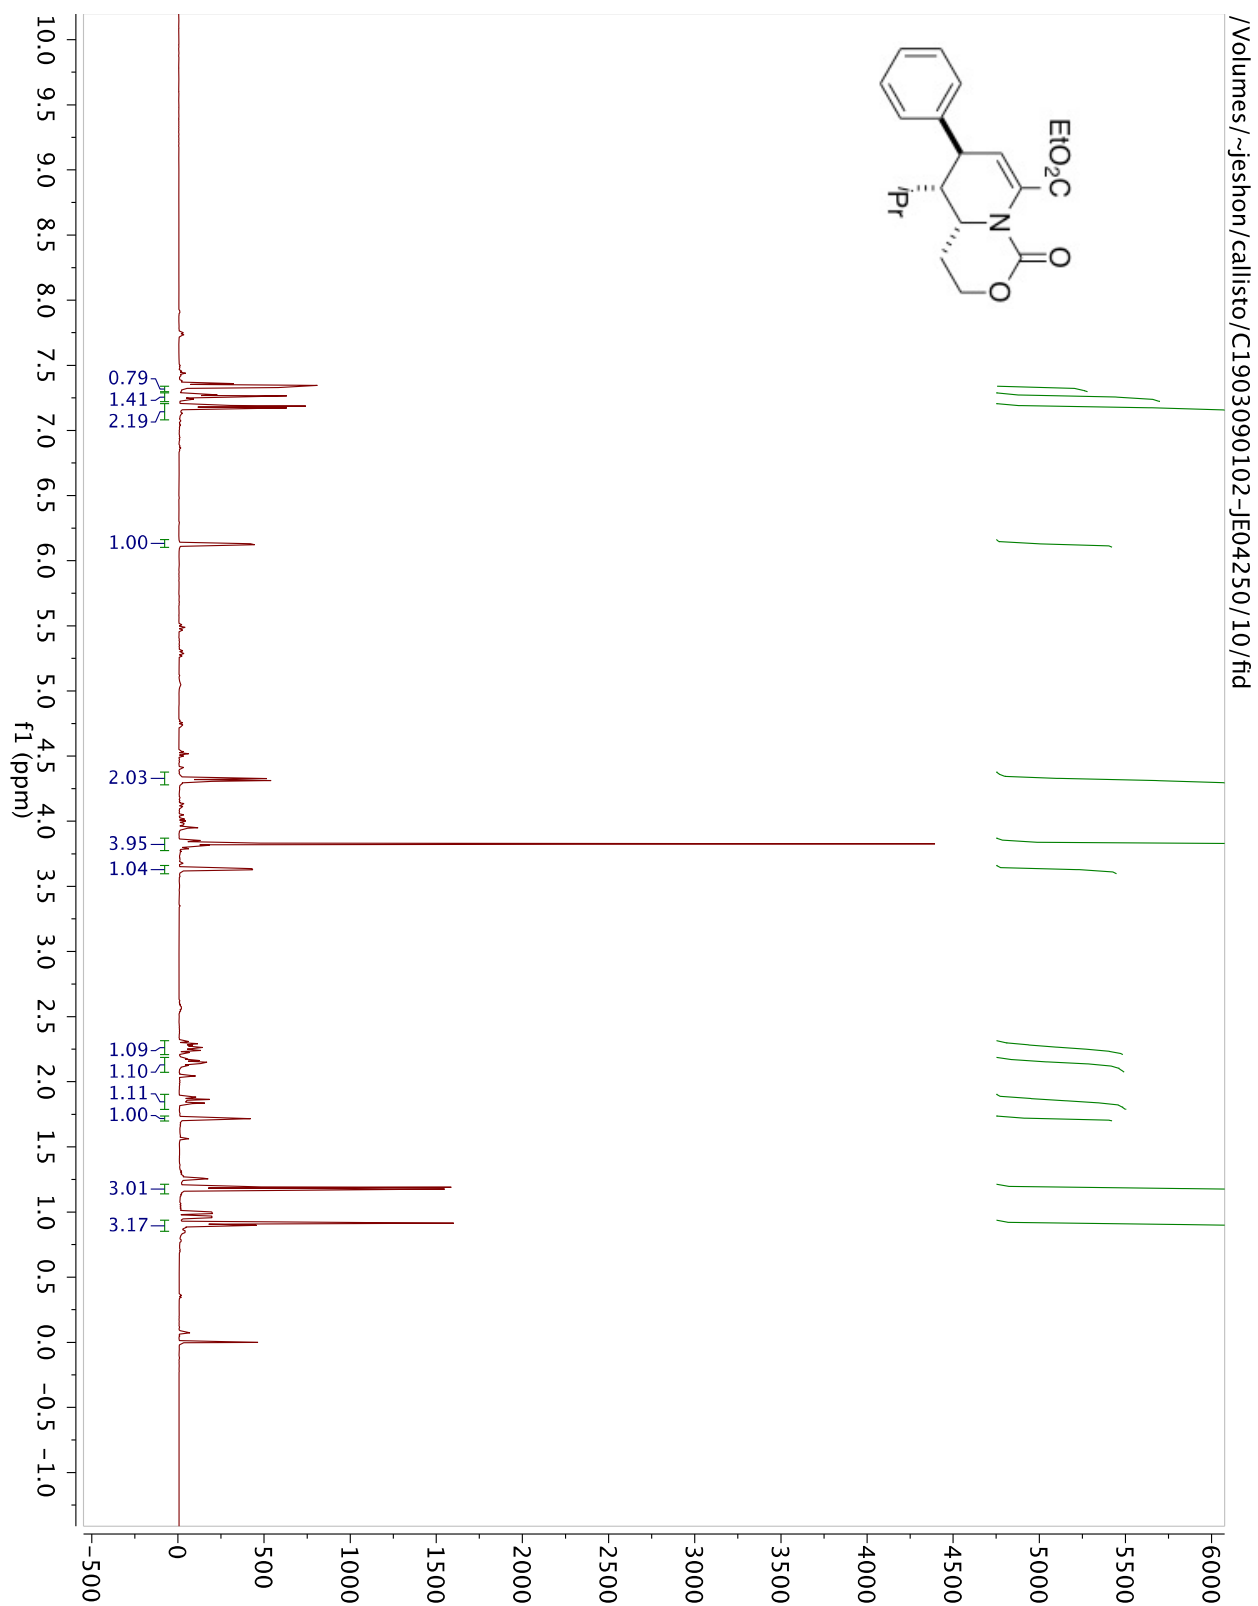

**Supplementary Figure 49.**  $^{13}\text{C}$  NMR (126 MHz,  $\text{CDCl}_3$ ) for compound **4ea**

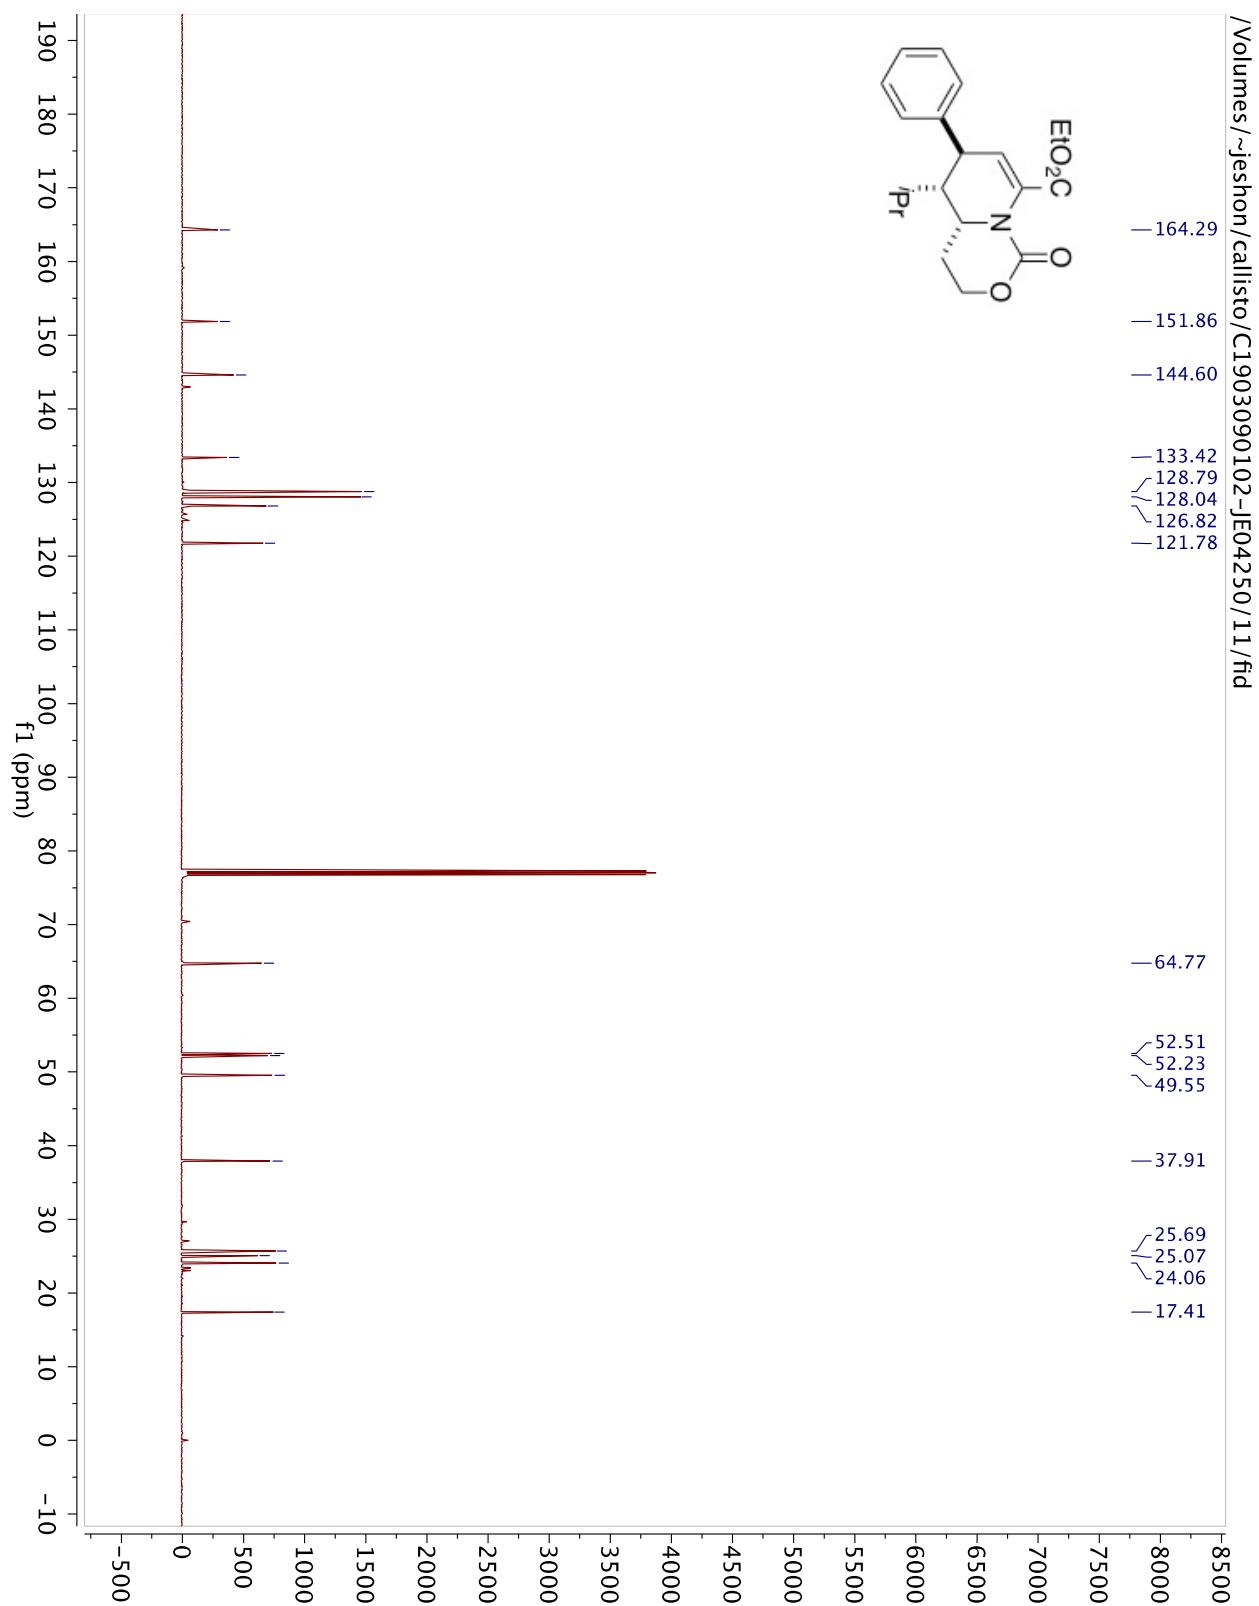

Supplementary Figure 50.  $^1\text{H}$  NMR (500 MHz,  $\text{CDCl}_3$ ) for compound **4fa**

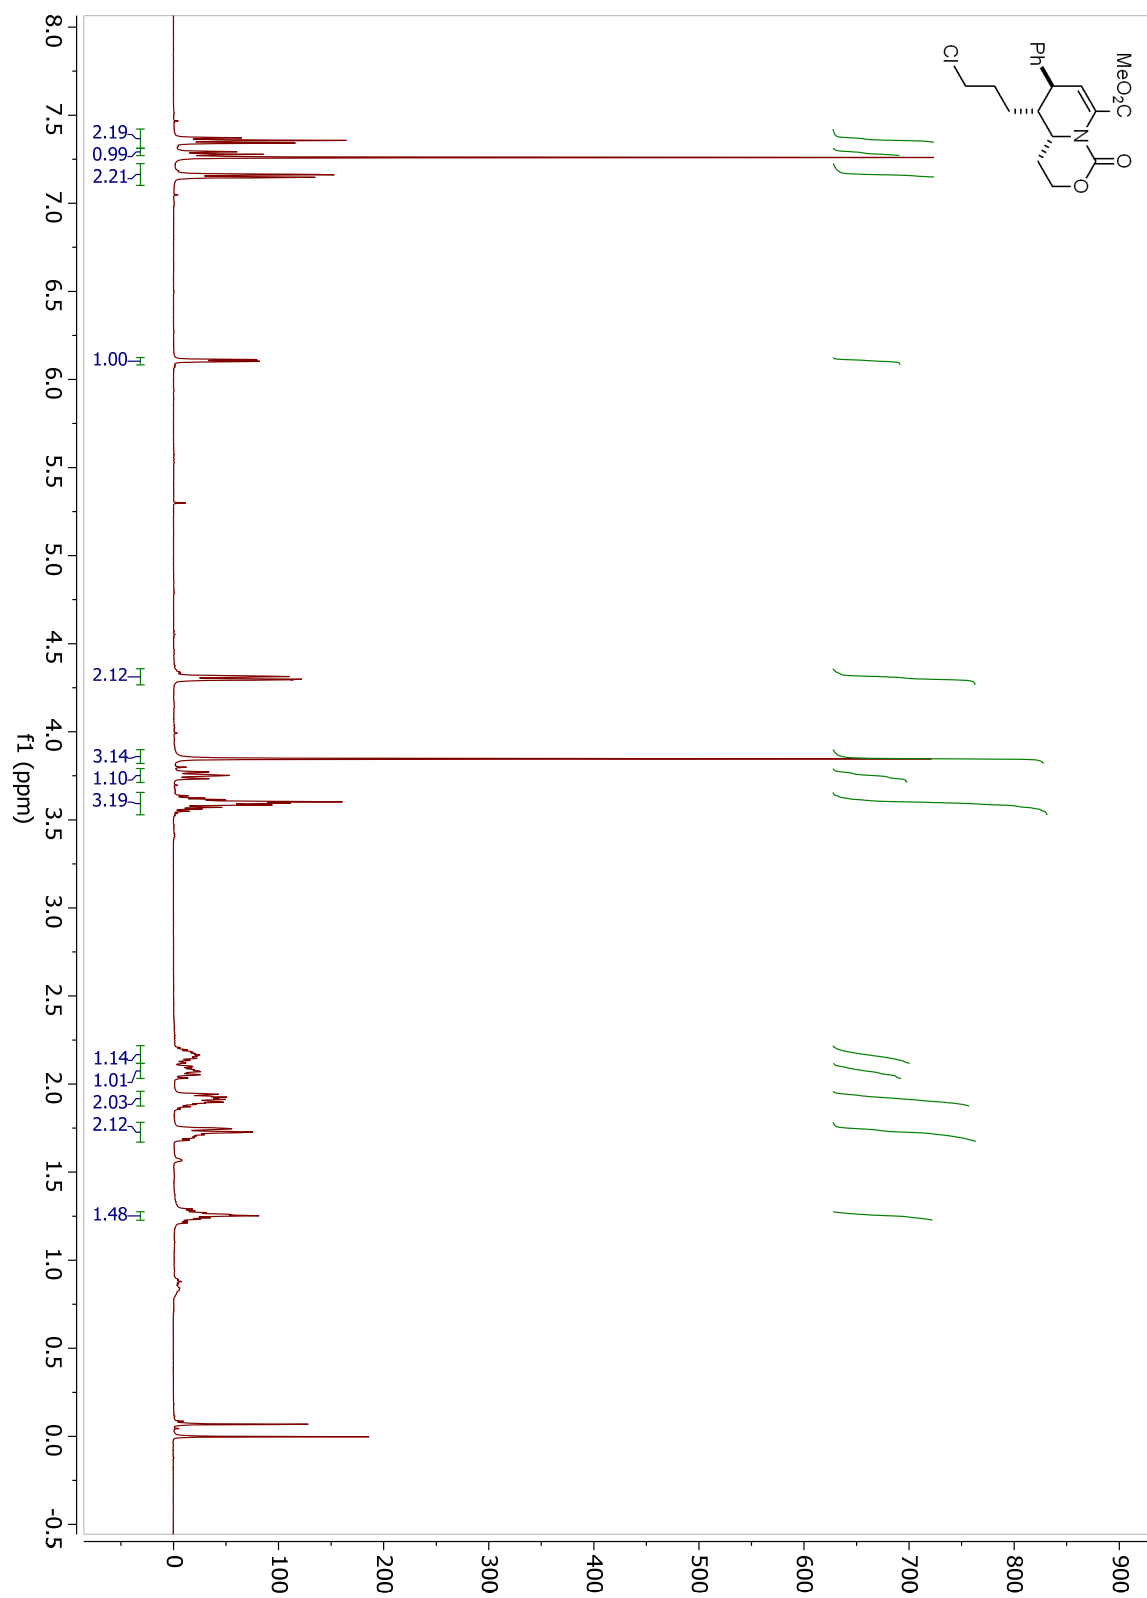

Supplementary Figure 51.  $^{13}\text{C}$  NMR (126 MHz,  $\text{CDCl}_3$ ) for compound 4fa

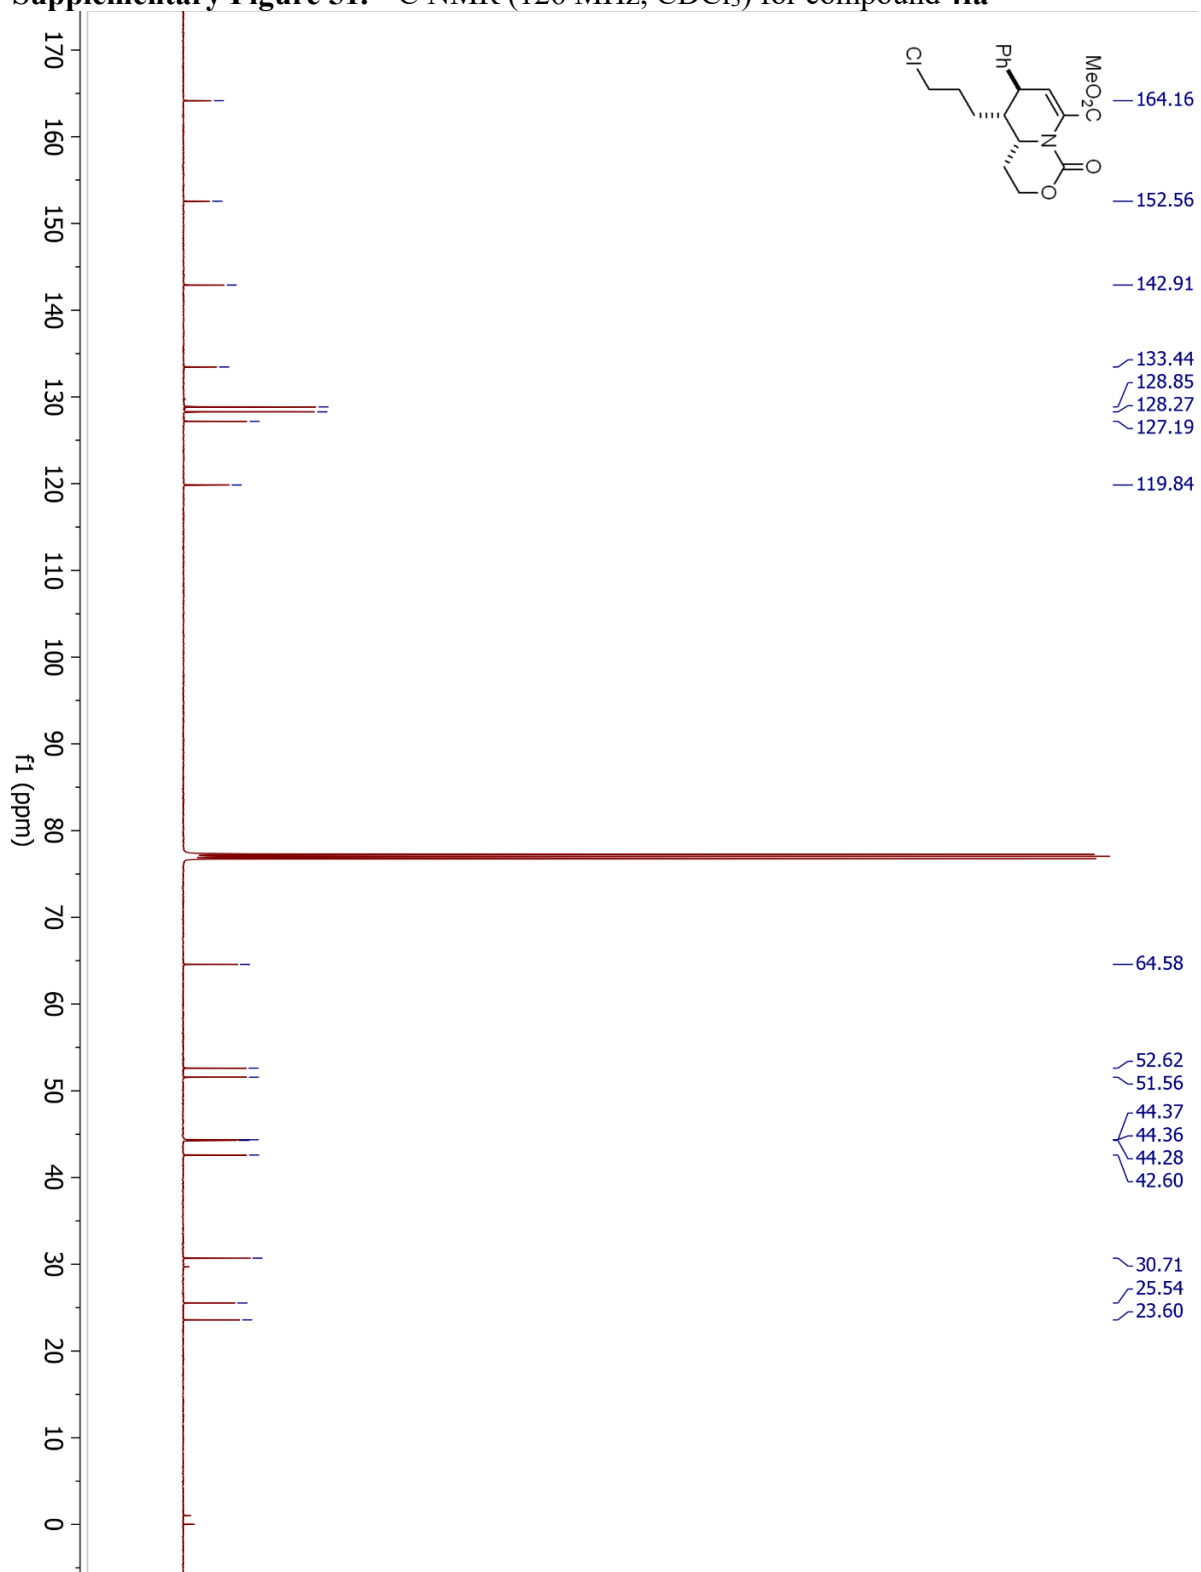

Supplementary Figure 52.  $^1\text{H}$  NMR (500 MHz,  $\text{CDCl}_3$ ) for compound **4ga**

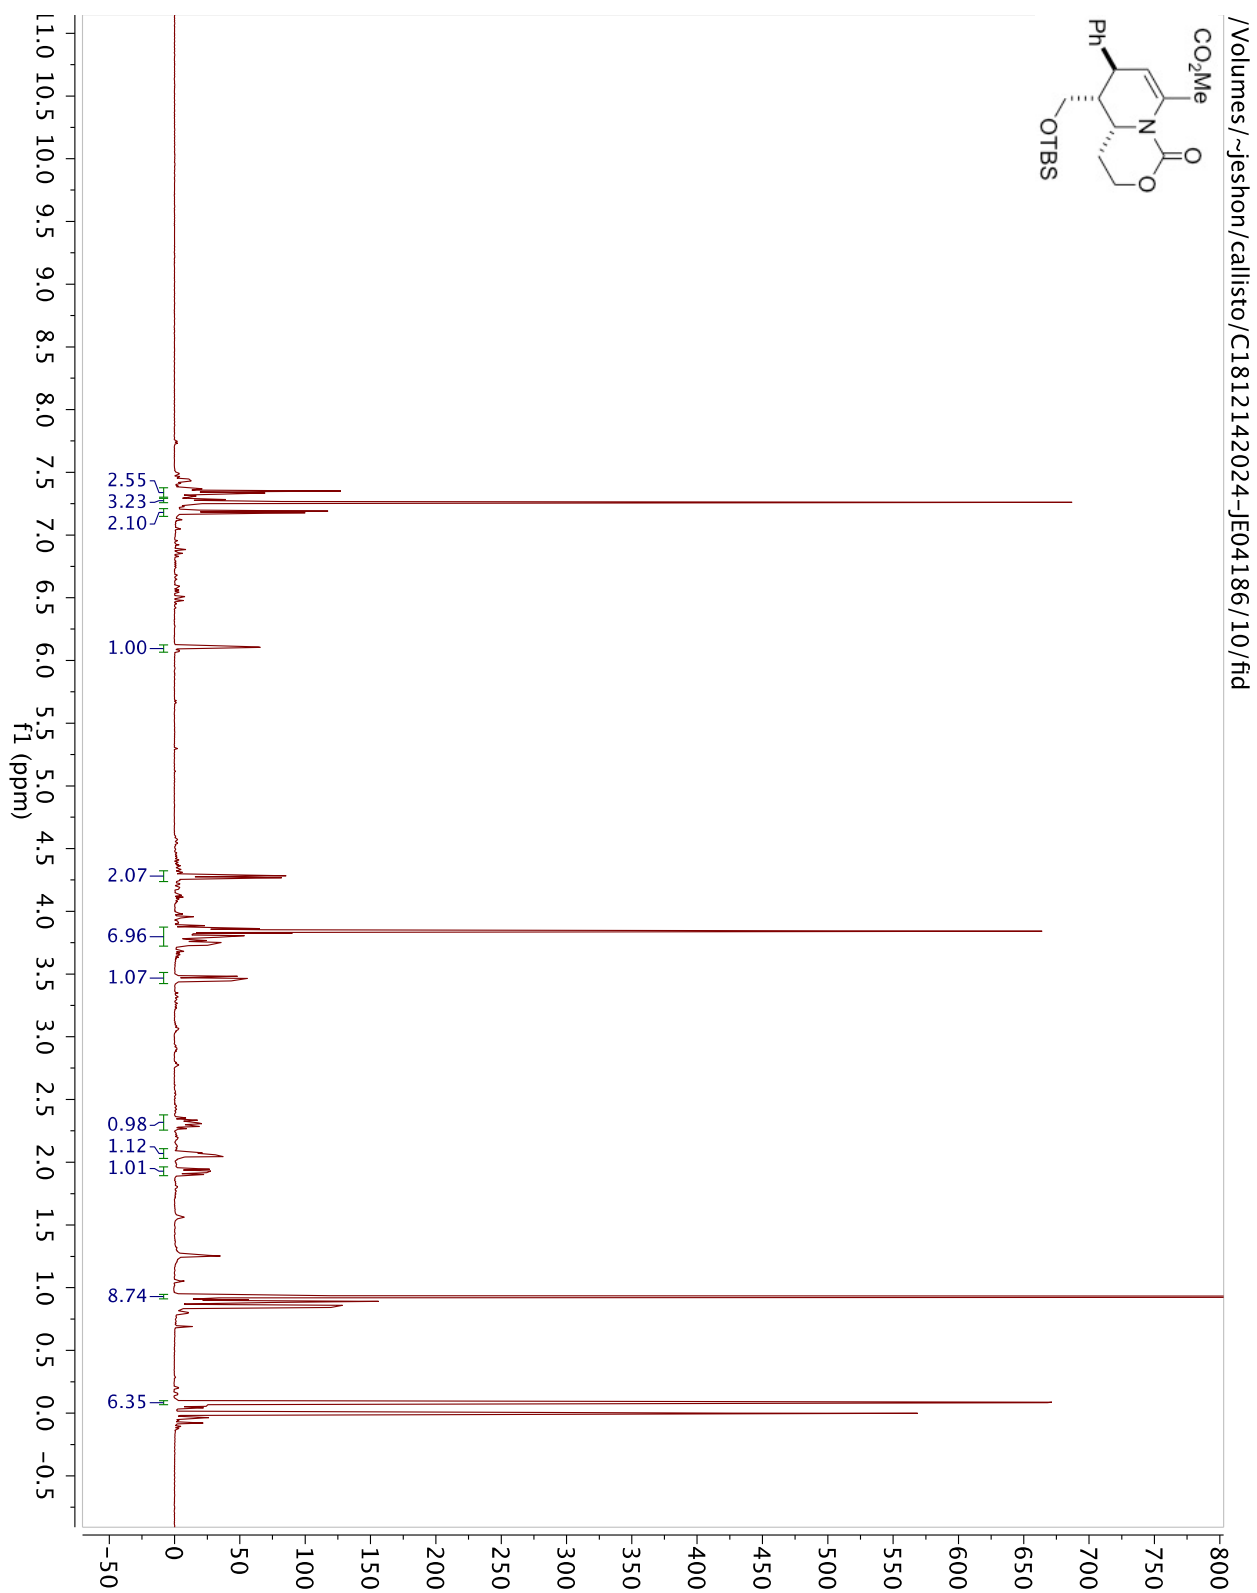

Supplementary Figure 53.  $^{13}\text{C}$  NMR (126 MHz,  $\text{CDCl}_3$ ) for compound 4ga

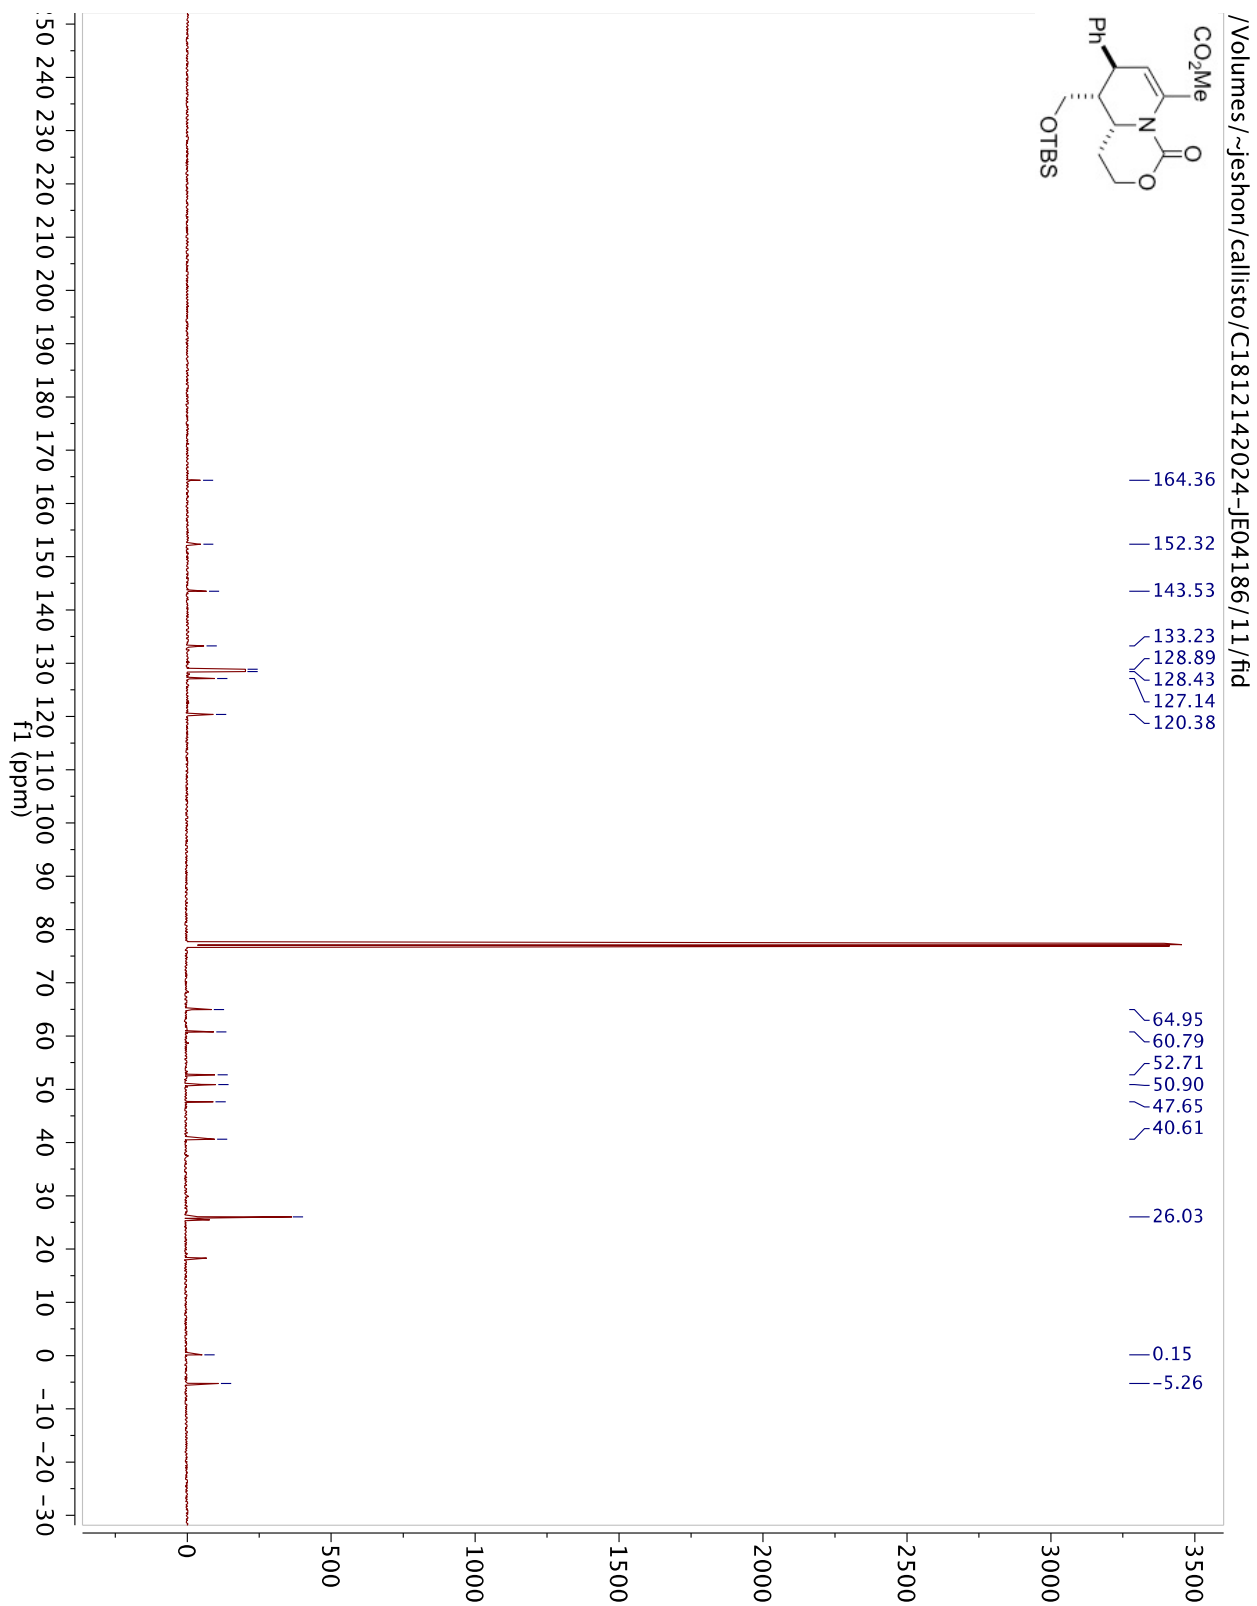

Supplementary Figure 54.  $^1\text{H}$  NMR (500 MHz,  $\text{CDCl}_3$ ) for compound **4ha**

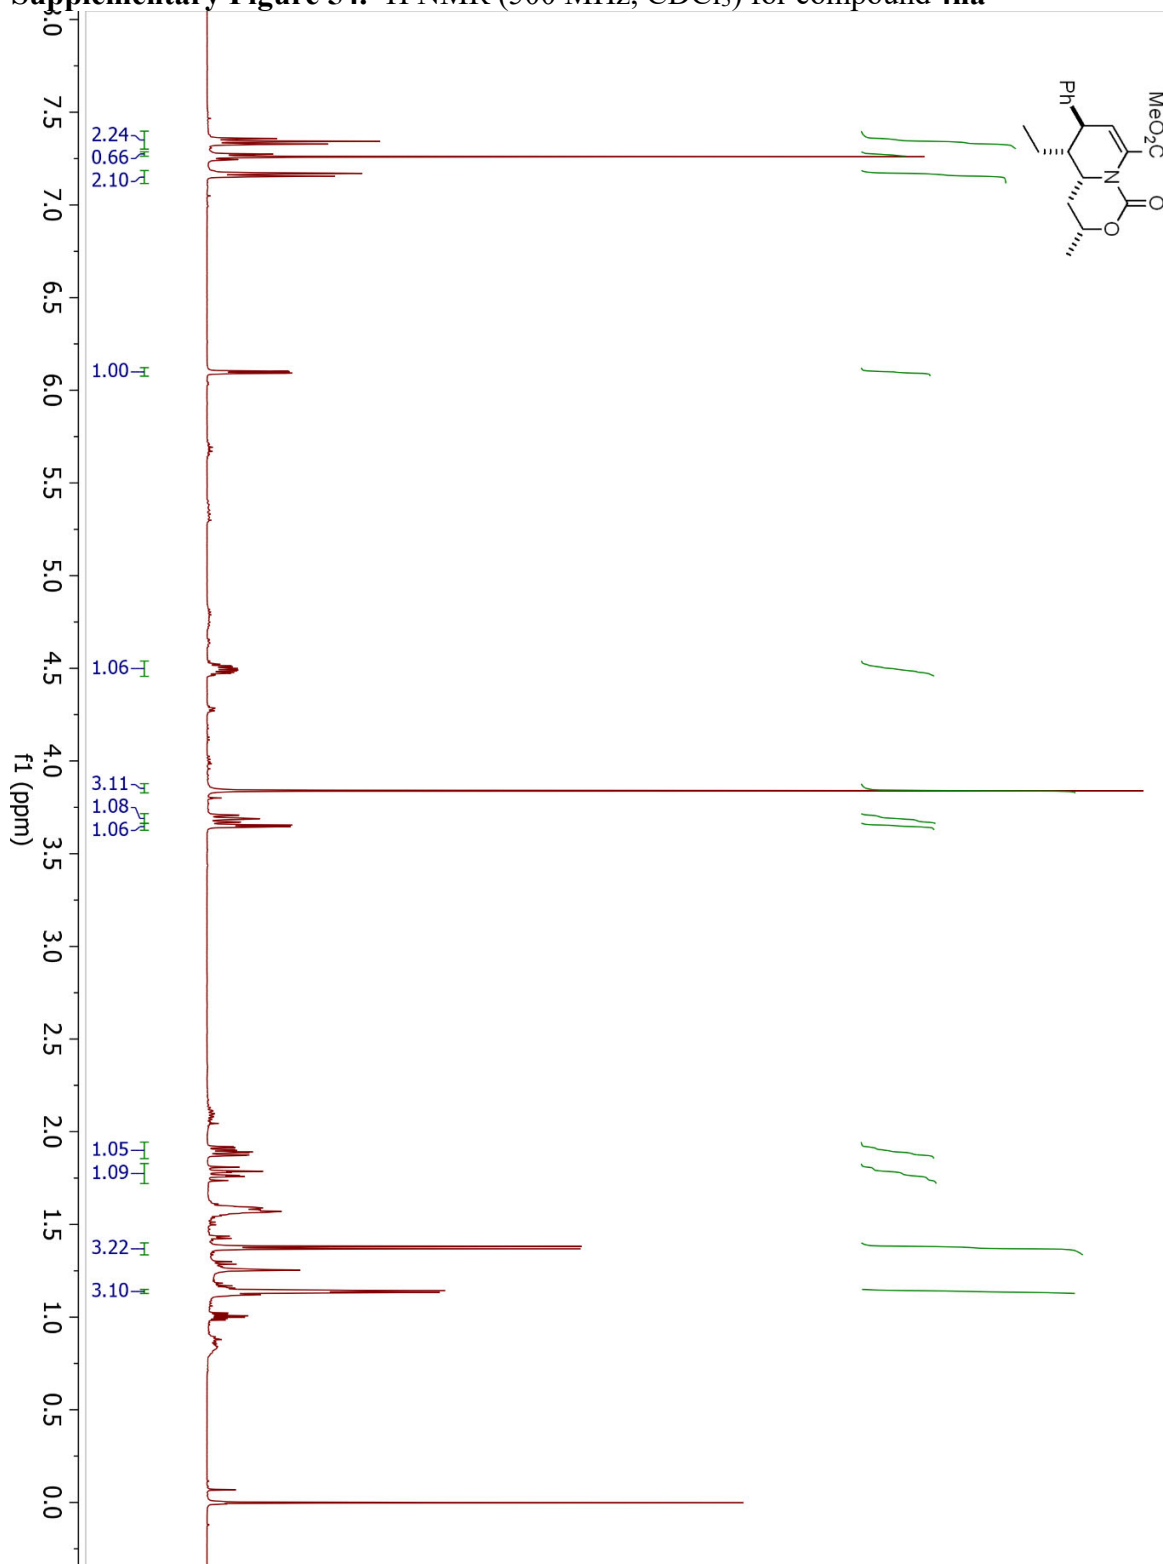

Supplementary Figure 55.  $^{13}\text{C}$  NMR (126 MHz,  $\text{CDCl}_3$ ) for compound **4ha**

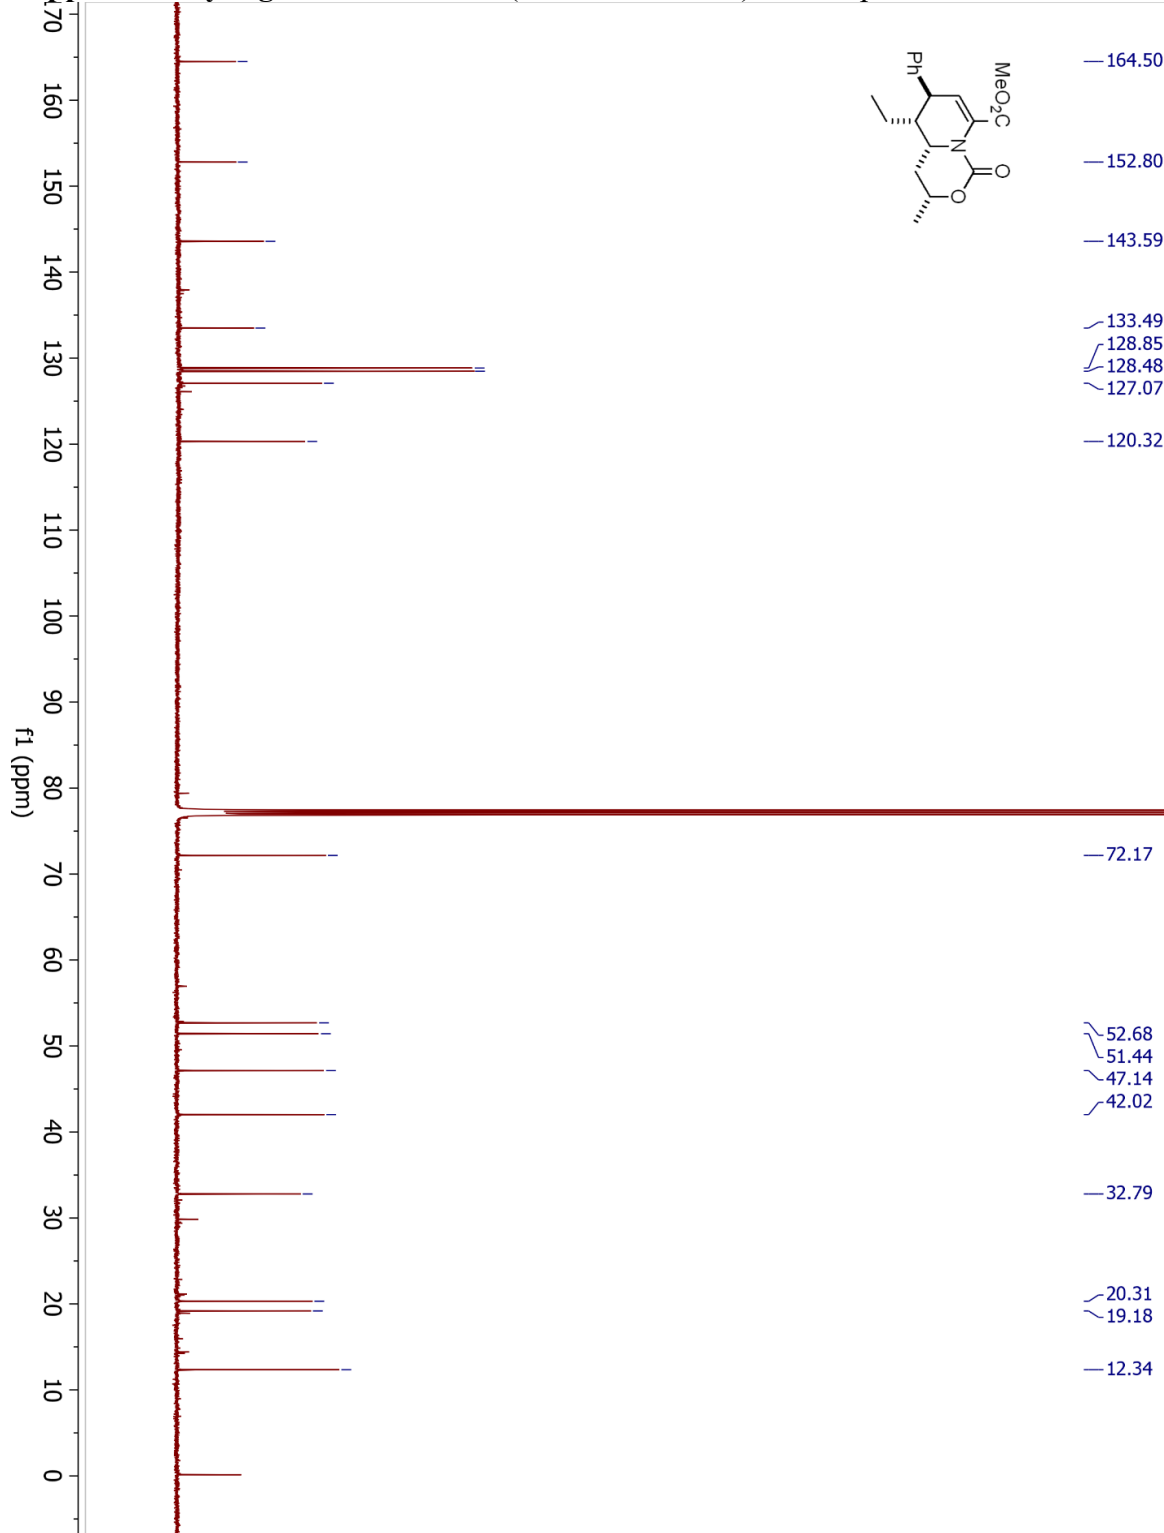

Supplementary Figure 56.  $^1\text{H}$  NMR (500 MHz,  $\text{CDCl}_3$ ) for compound **4ia**

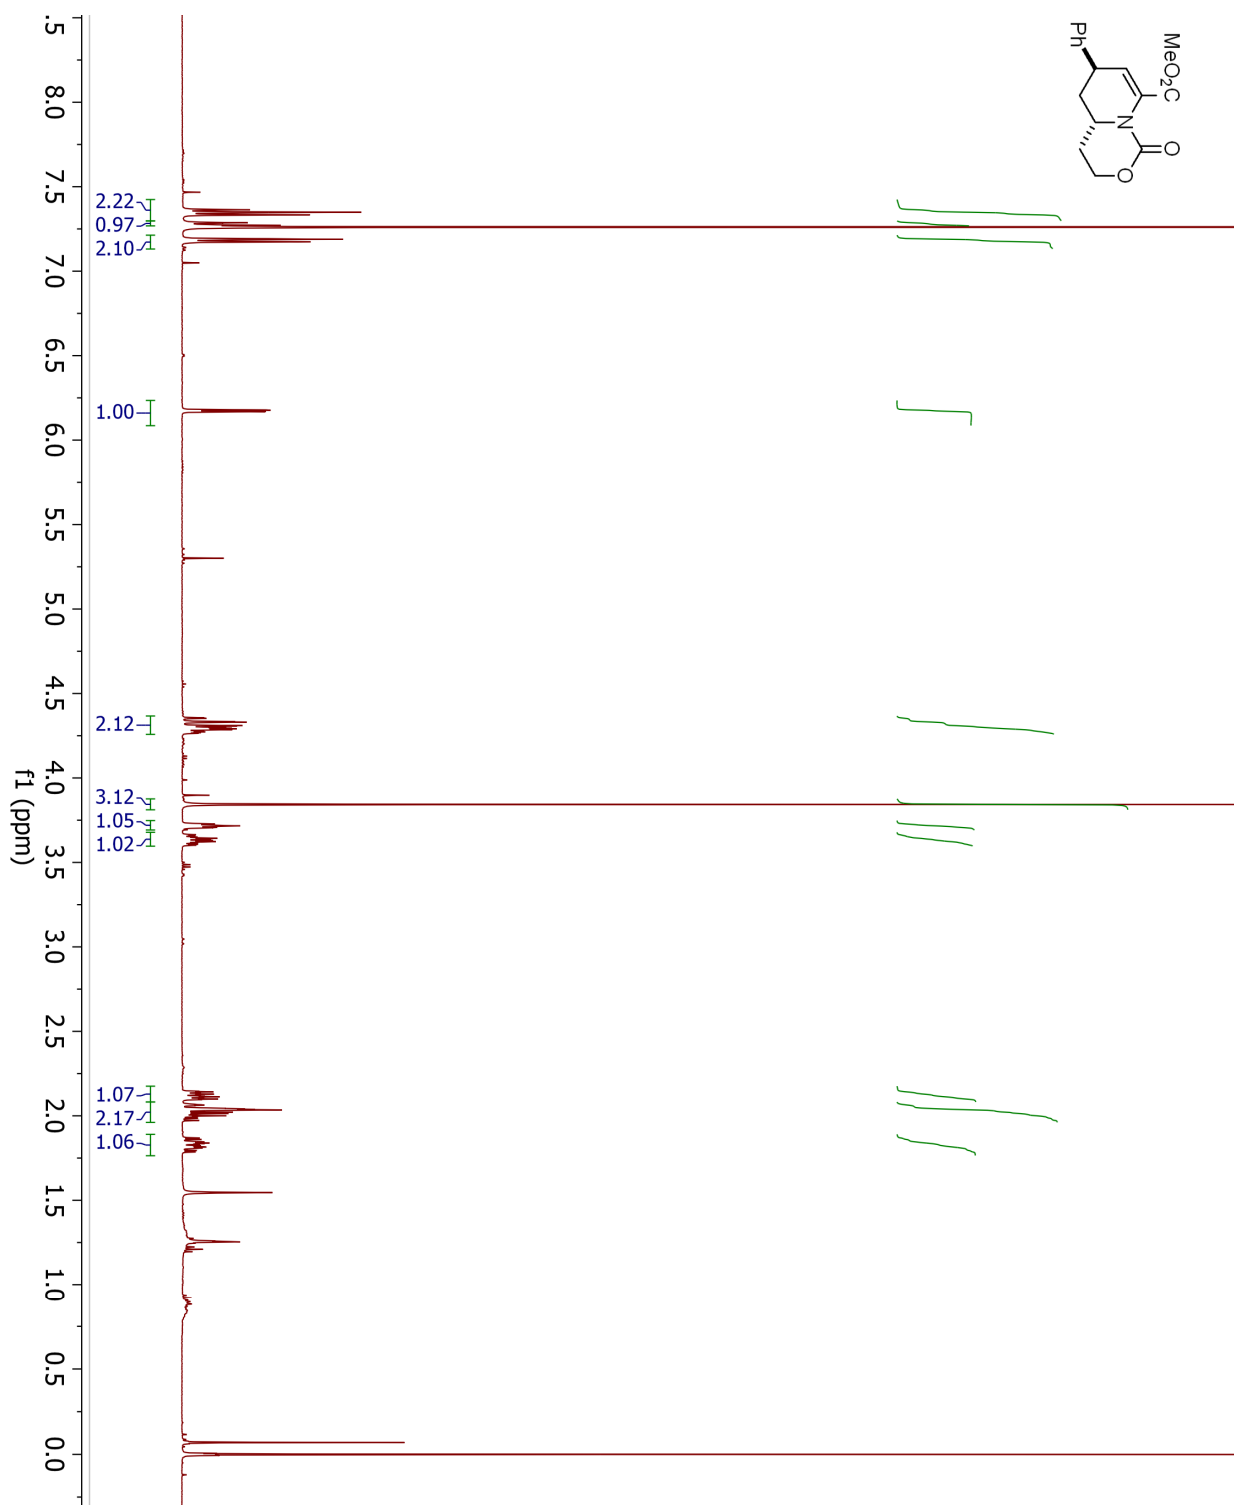

Supplementary Figure 57.  $^{13}\text{C}$  NMR (126 MHz,  $\text{CDCl}_3$ ) for compound **4ia**

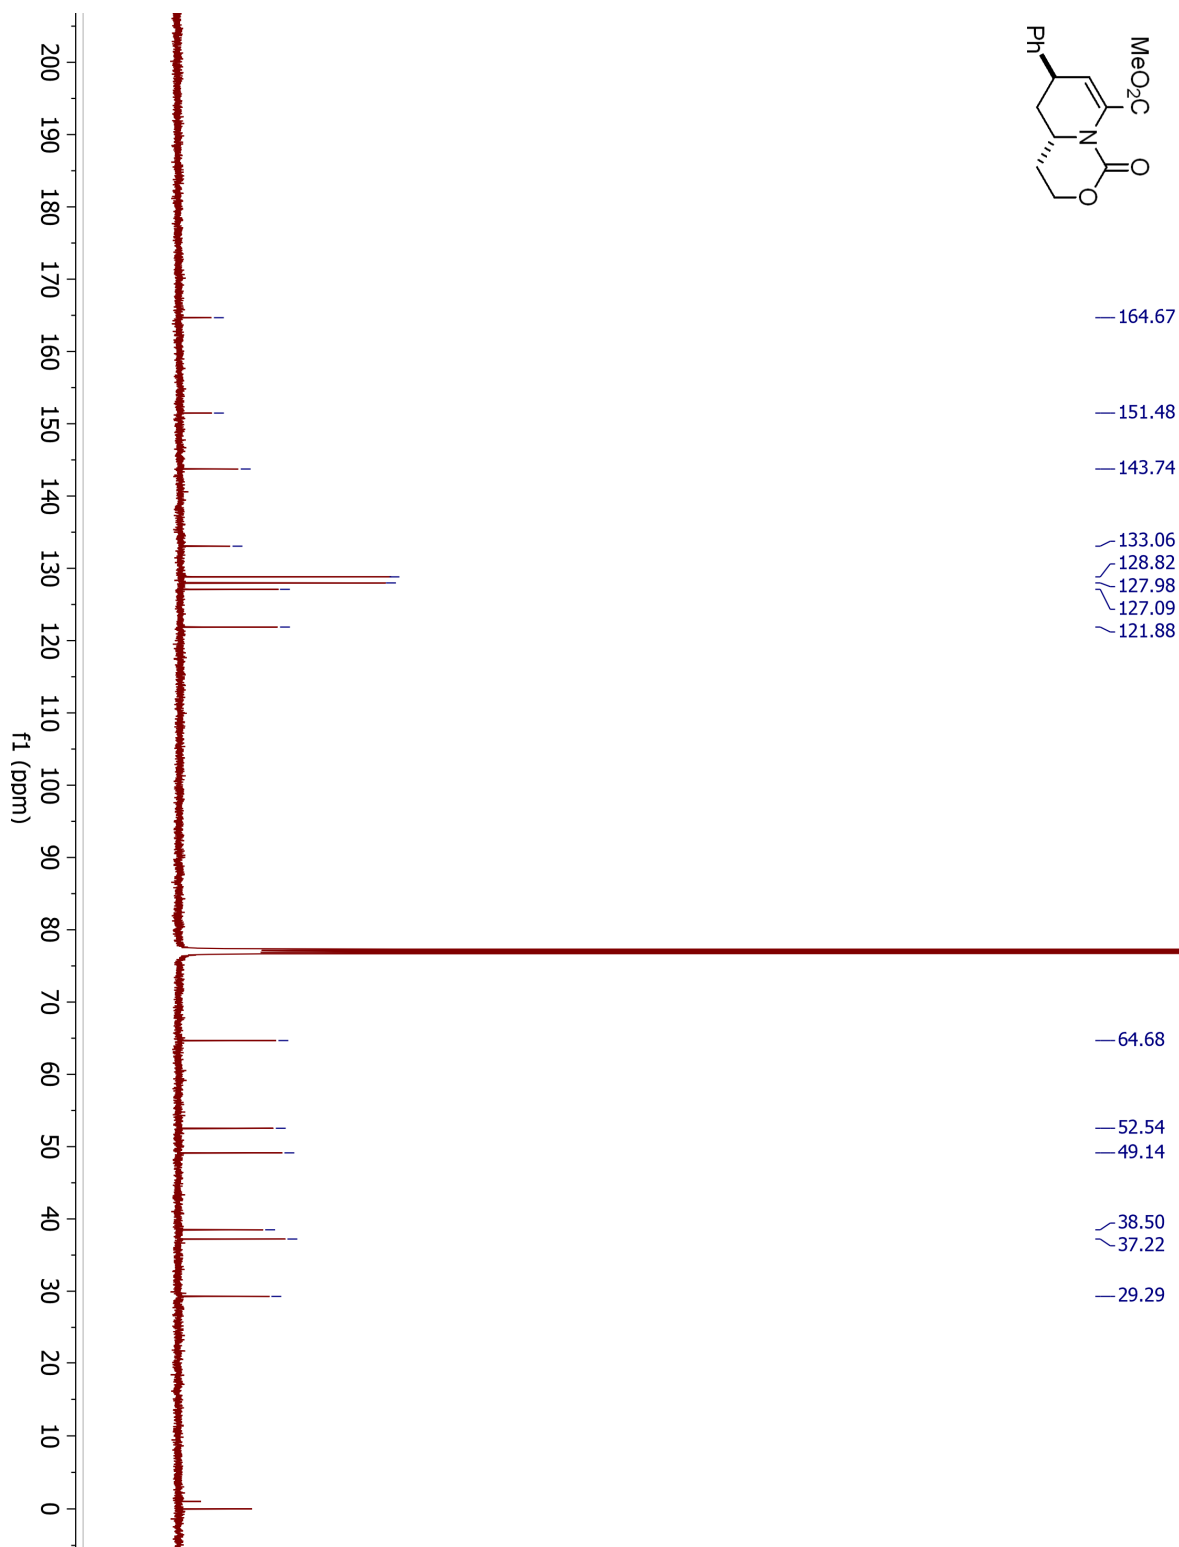

Supplementary Figure 58.  $^1\text{H}$  NMR (500 MHz,  $\text{CDCl}_3$ ) for compound **4ja**

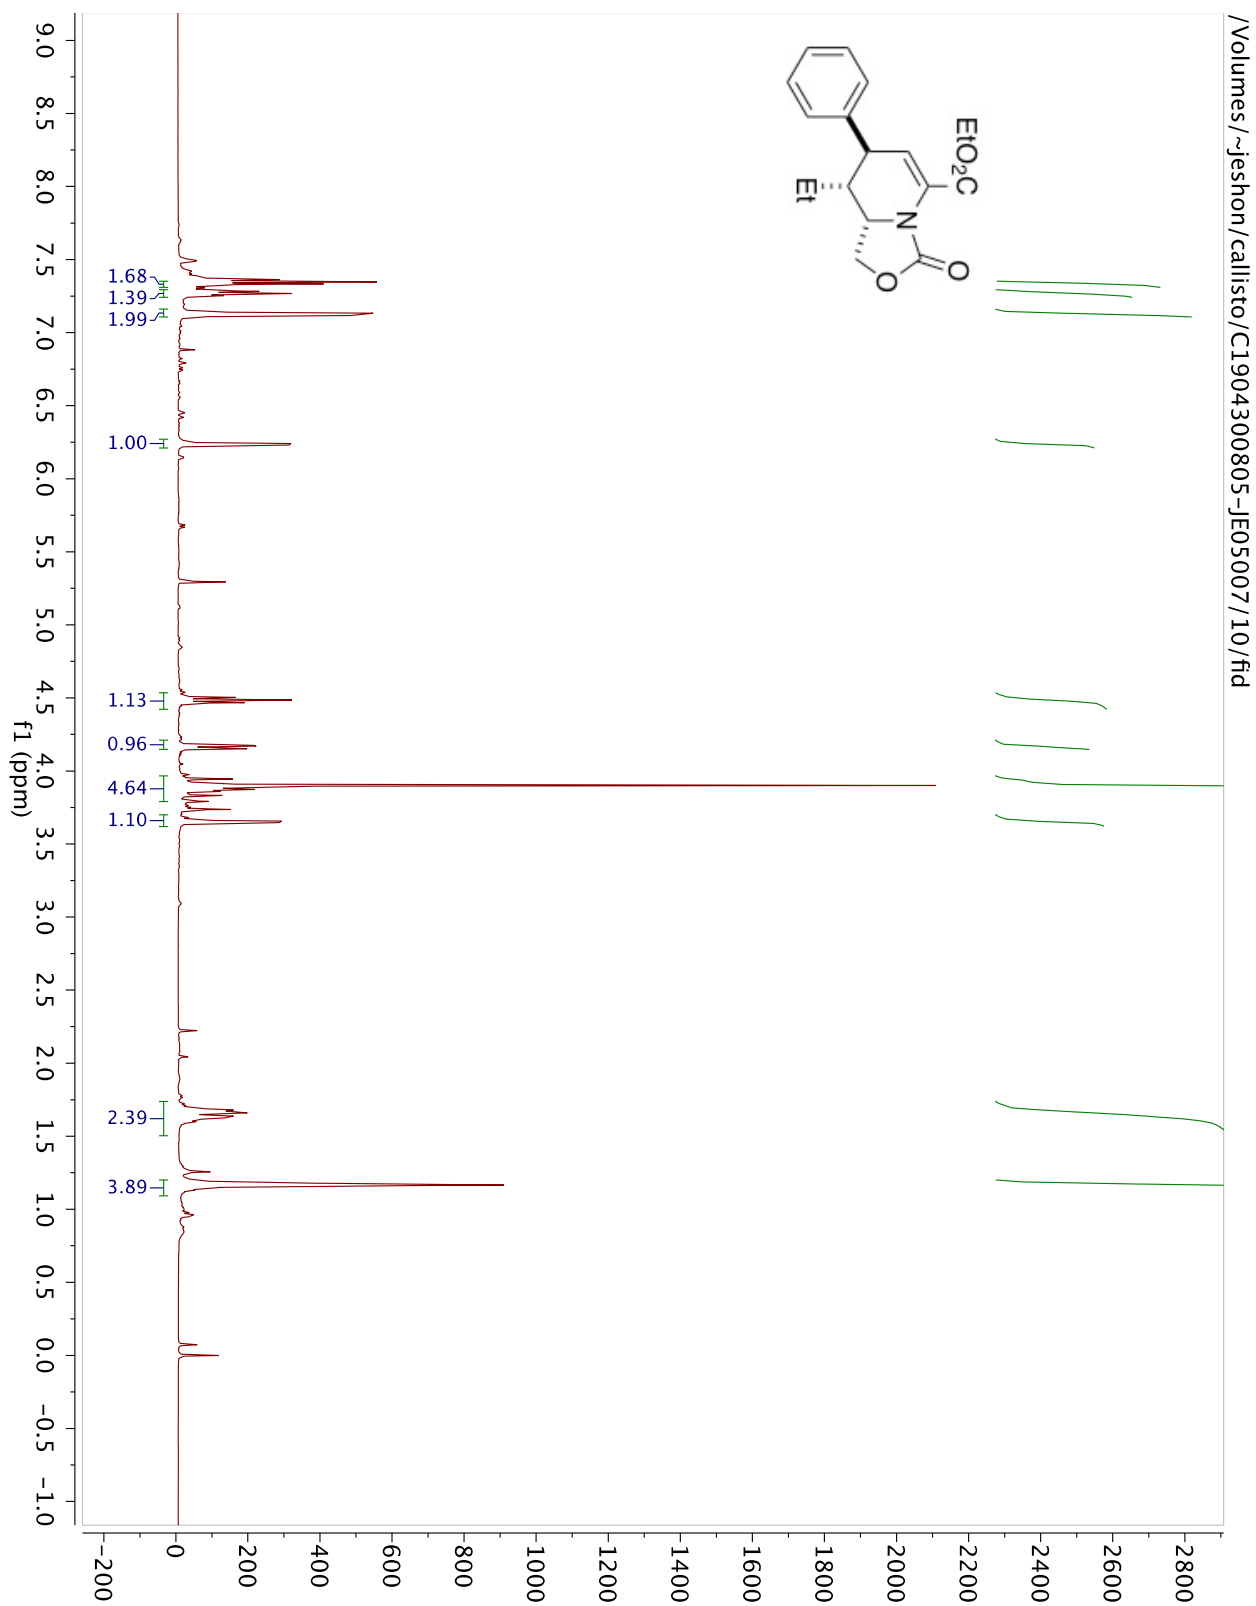

Supplementary Figure 59.  $^{13}\text{C}$  NMR (126 MHz,  $\text{CDCl}_3$ ) for compound **4ja**

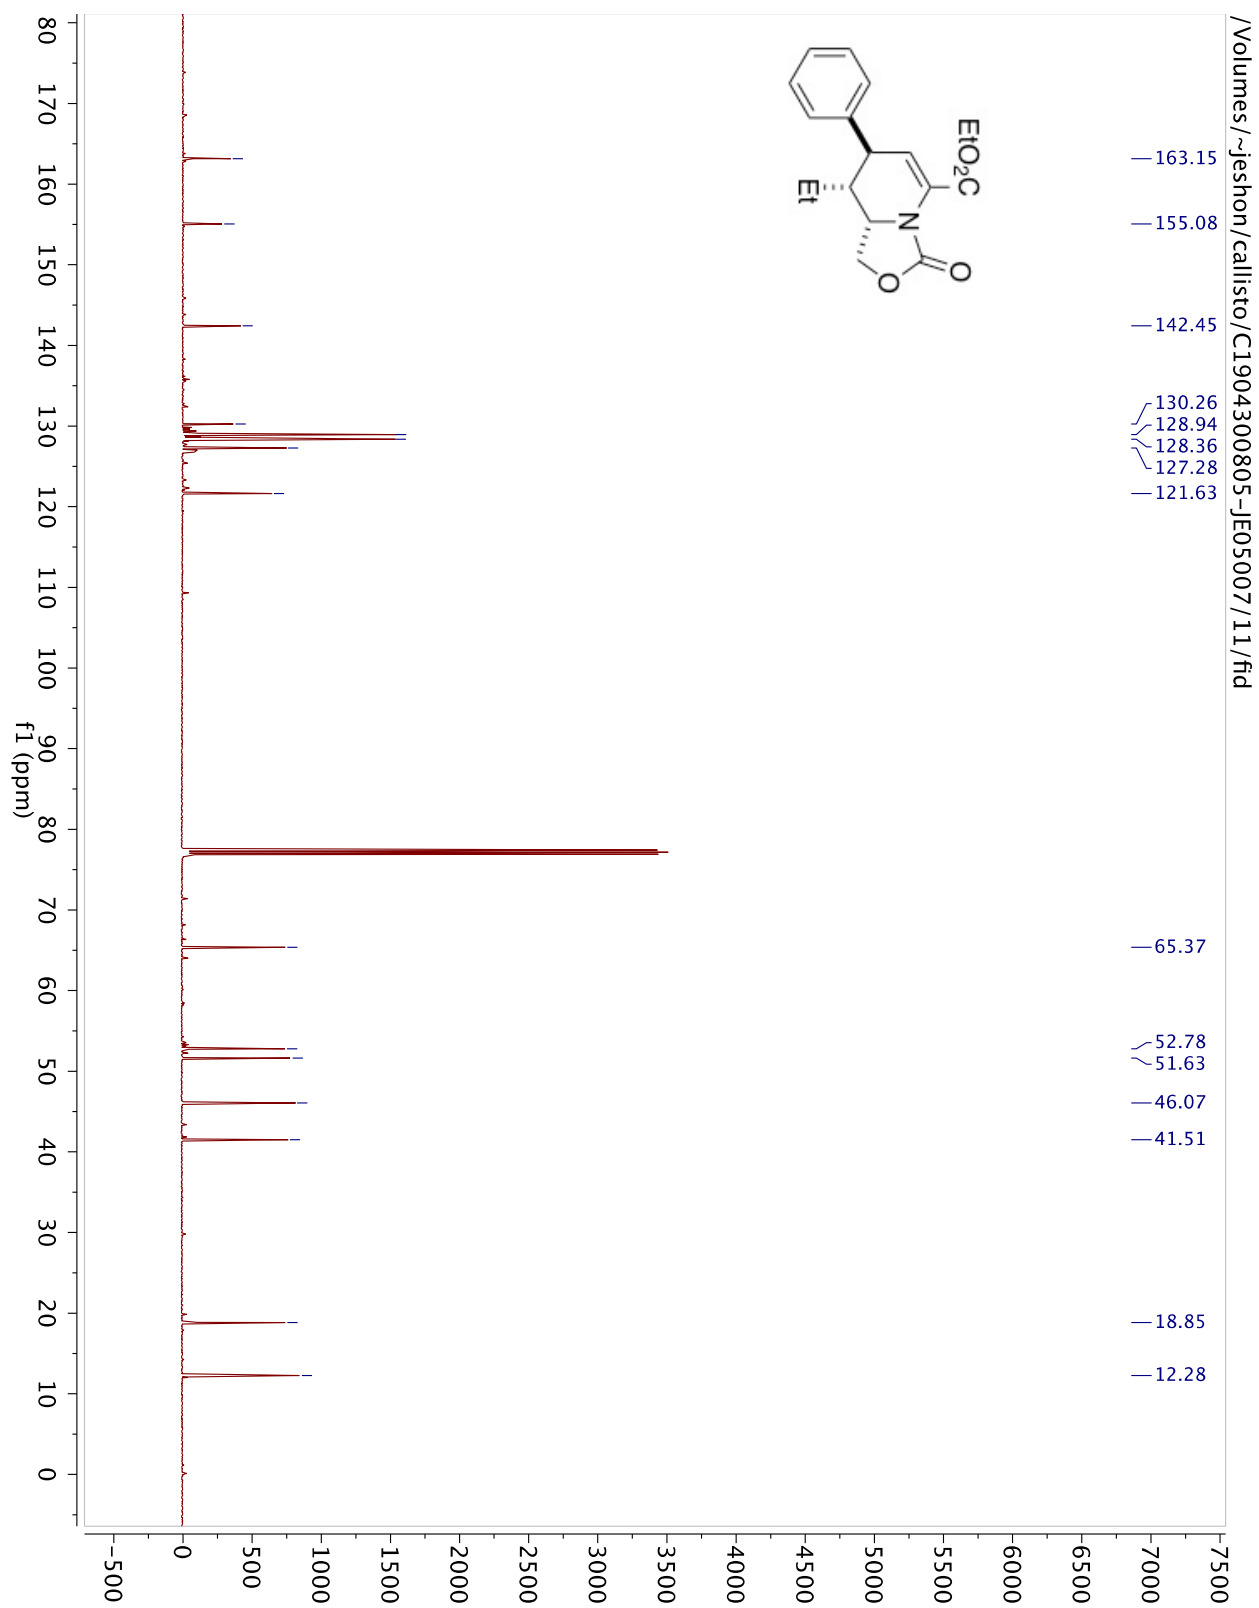

Supplementary Figure 60.  $^1\text{H}$  NMR (500 MHz,  $\text{CDCl}_3$ ) for compound **4cb**

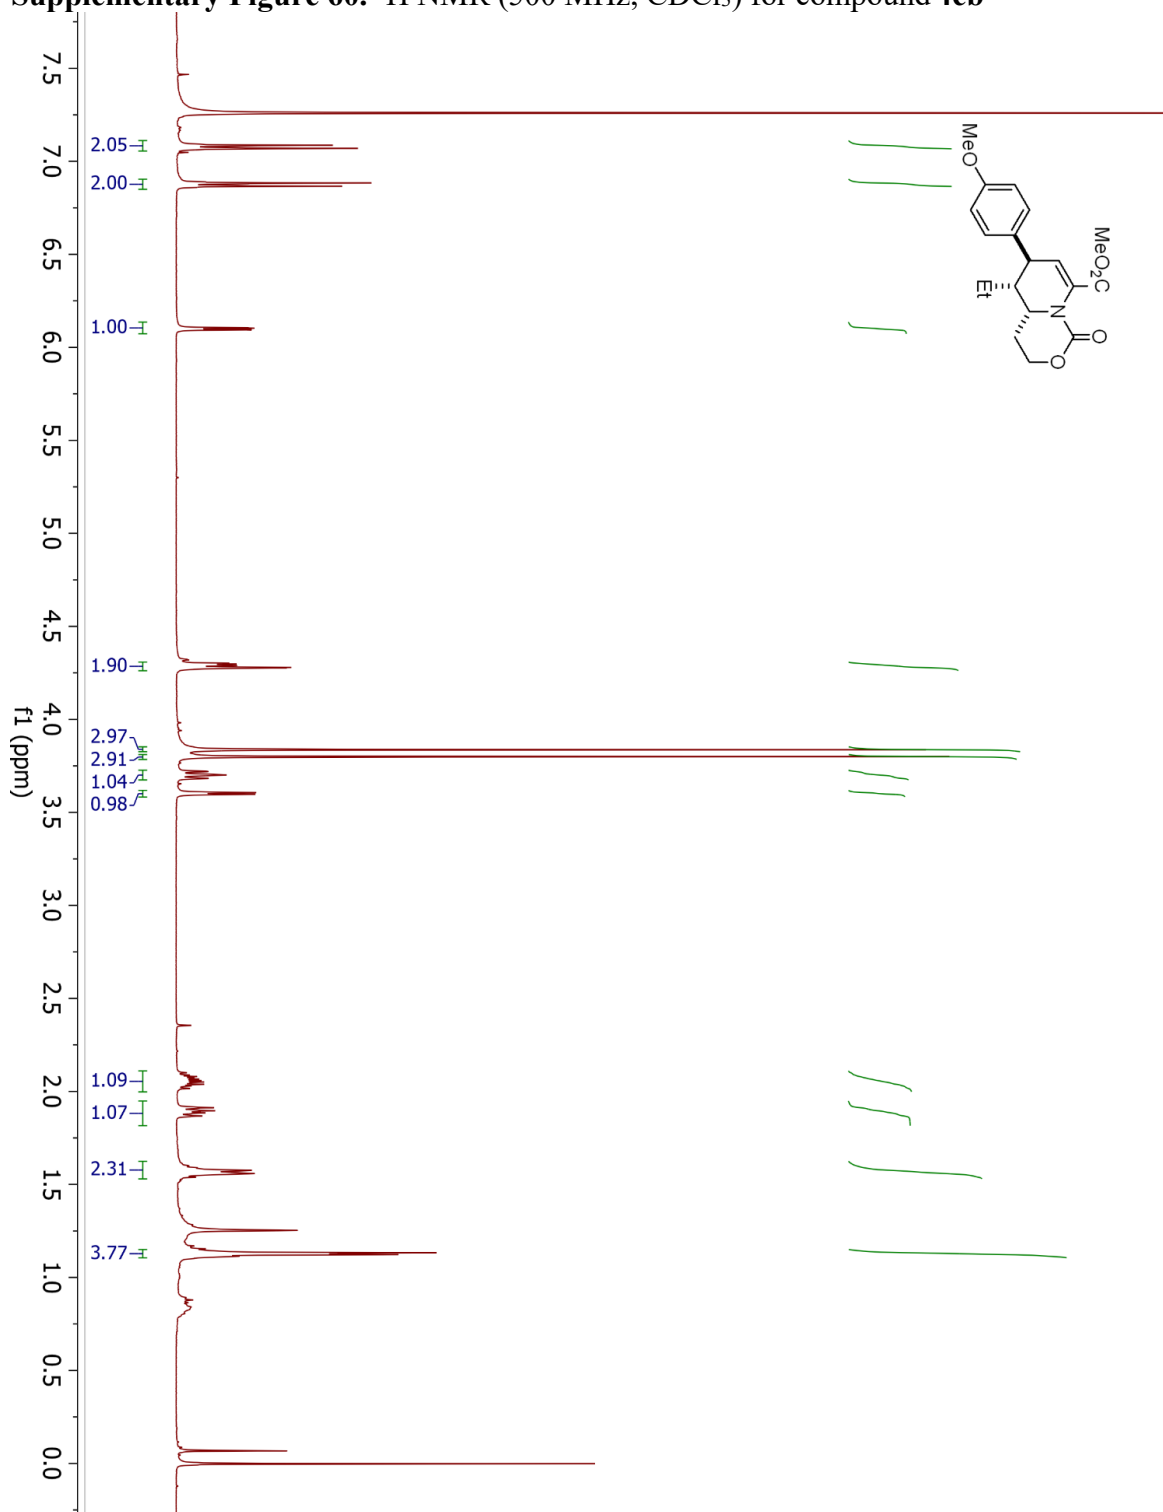

Supplementary Figure 61.  $^{13}\text{C}$  NMR (126 MHz,  $\text{CDCl}_3$ ) for compound **4cb**

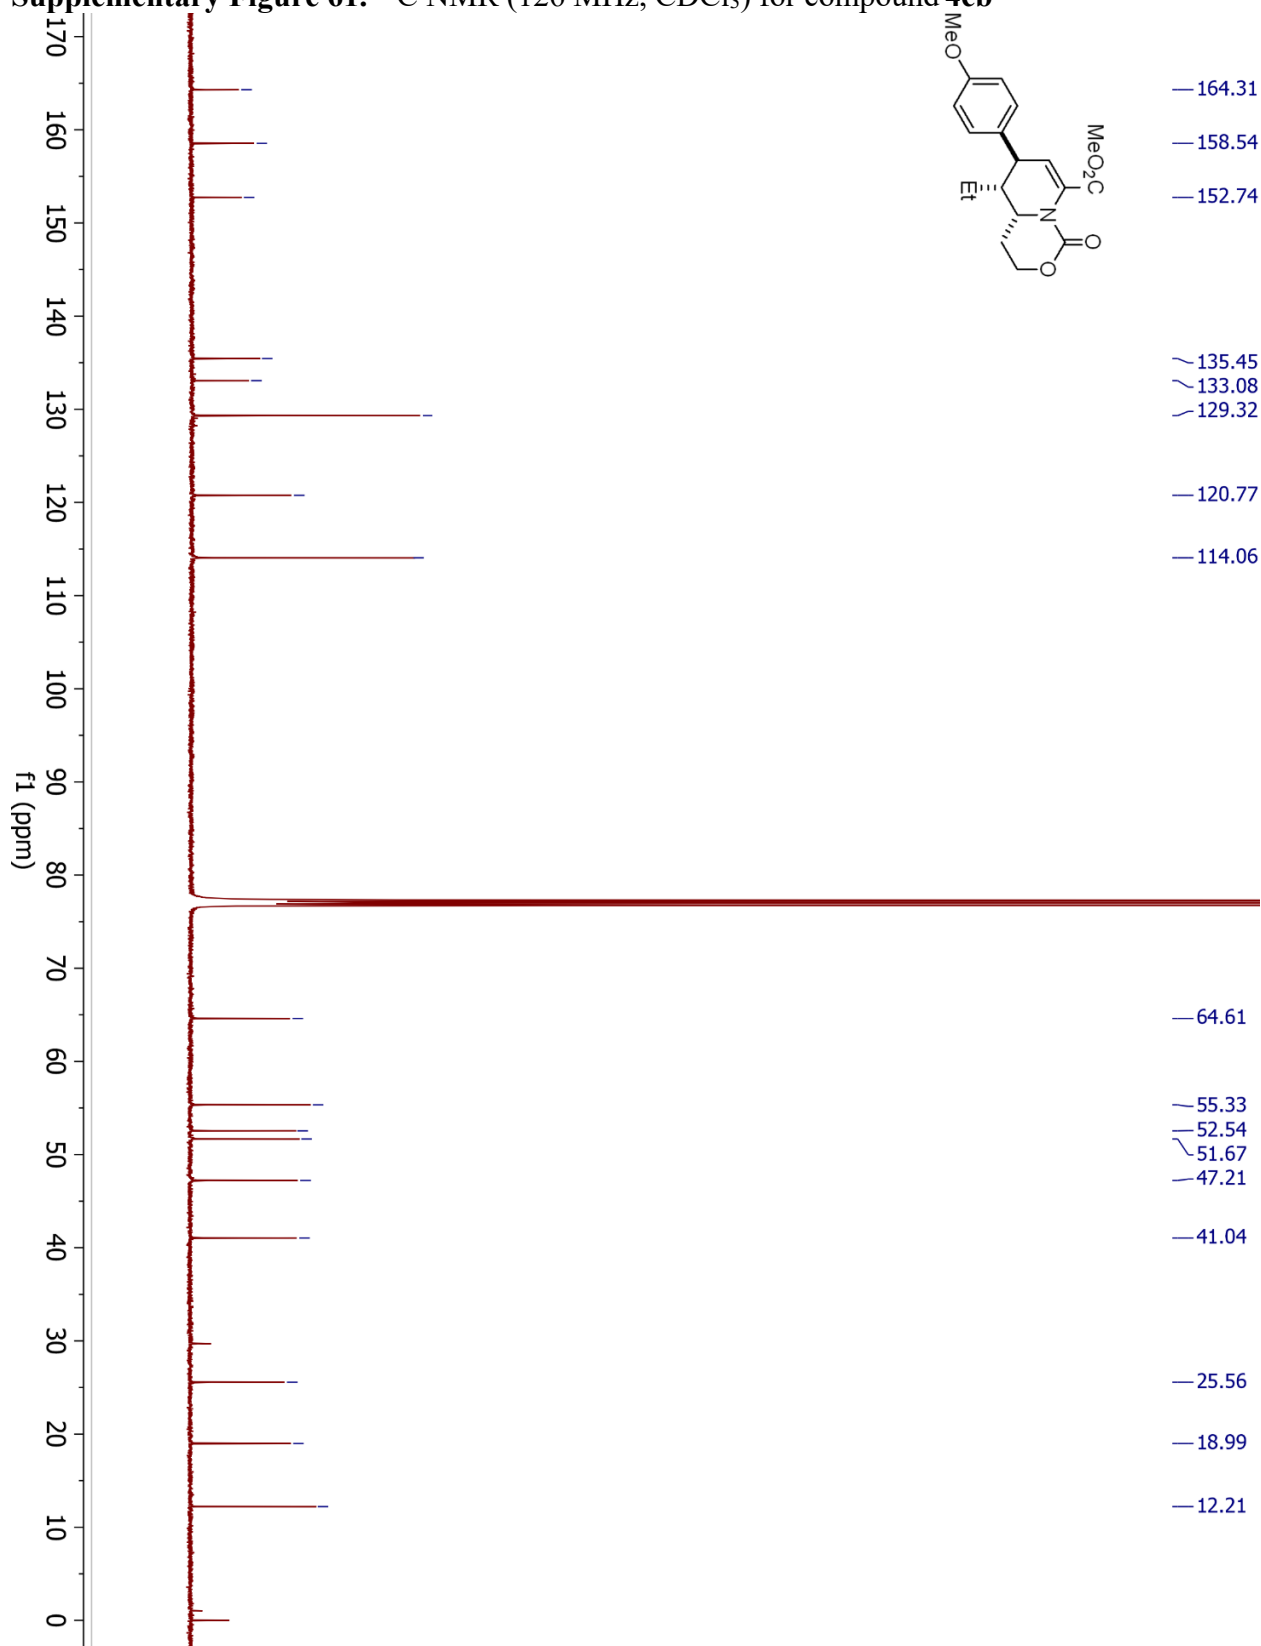

Supplementary Figure 62.  $^1\text{H}$  NMR (500 MHz,  $\text{CDCl}_3$ ) for compound 4cc

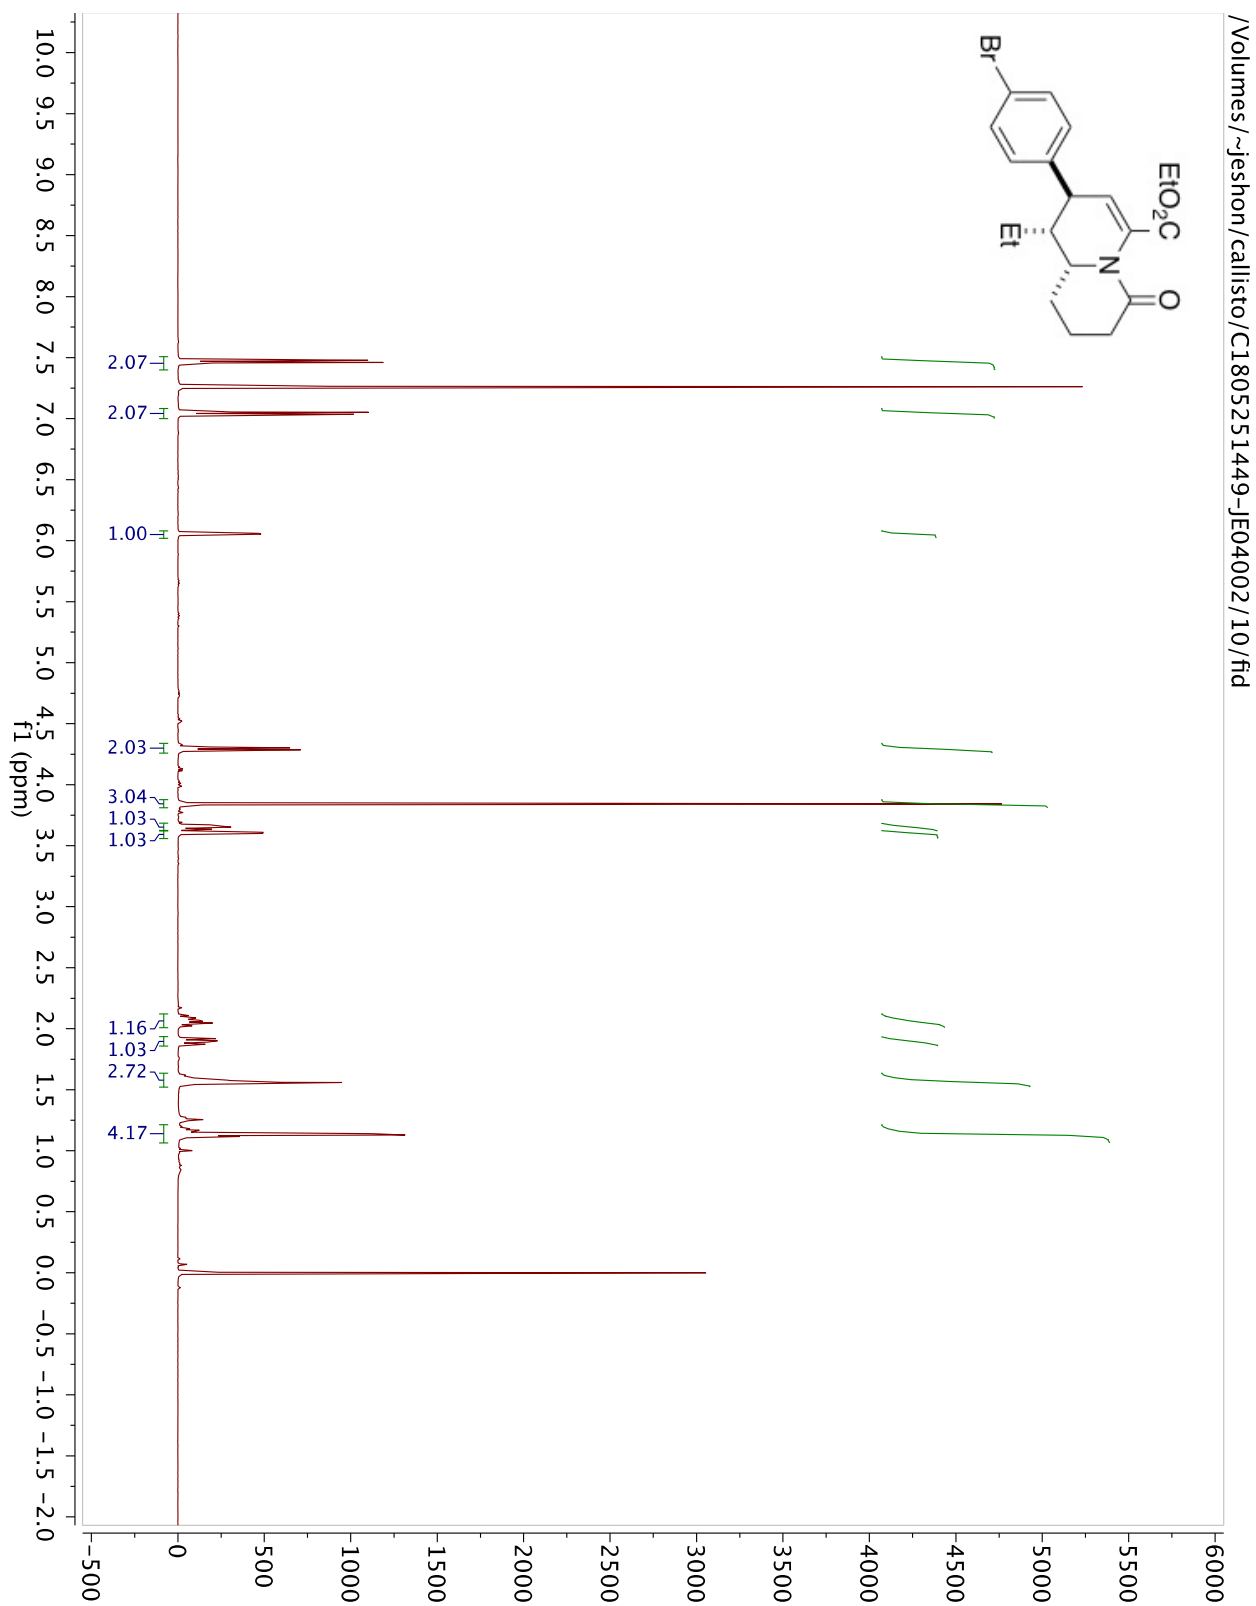

Supplementary Figure 63.  $^{13}\text{C}$  NMR (126 MHz,  $\text{CDCl}_3$ ) for compound **4cc**

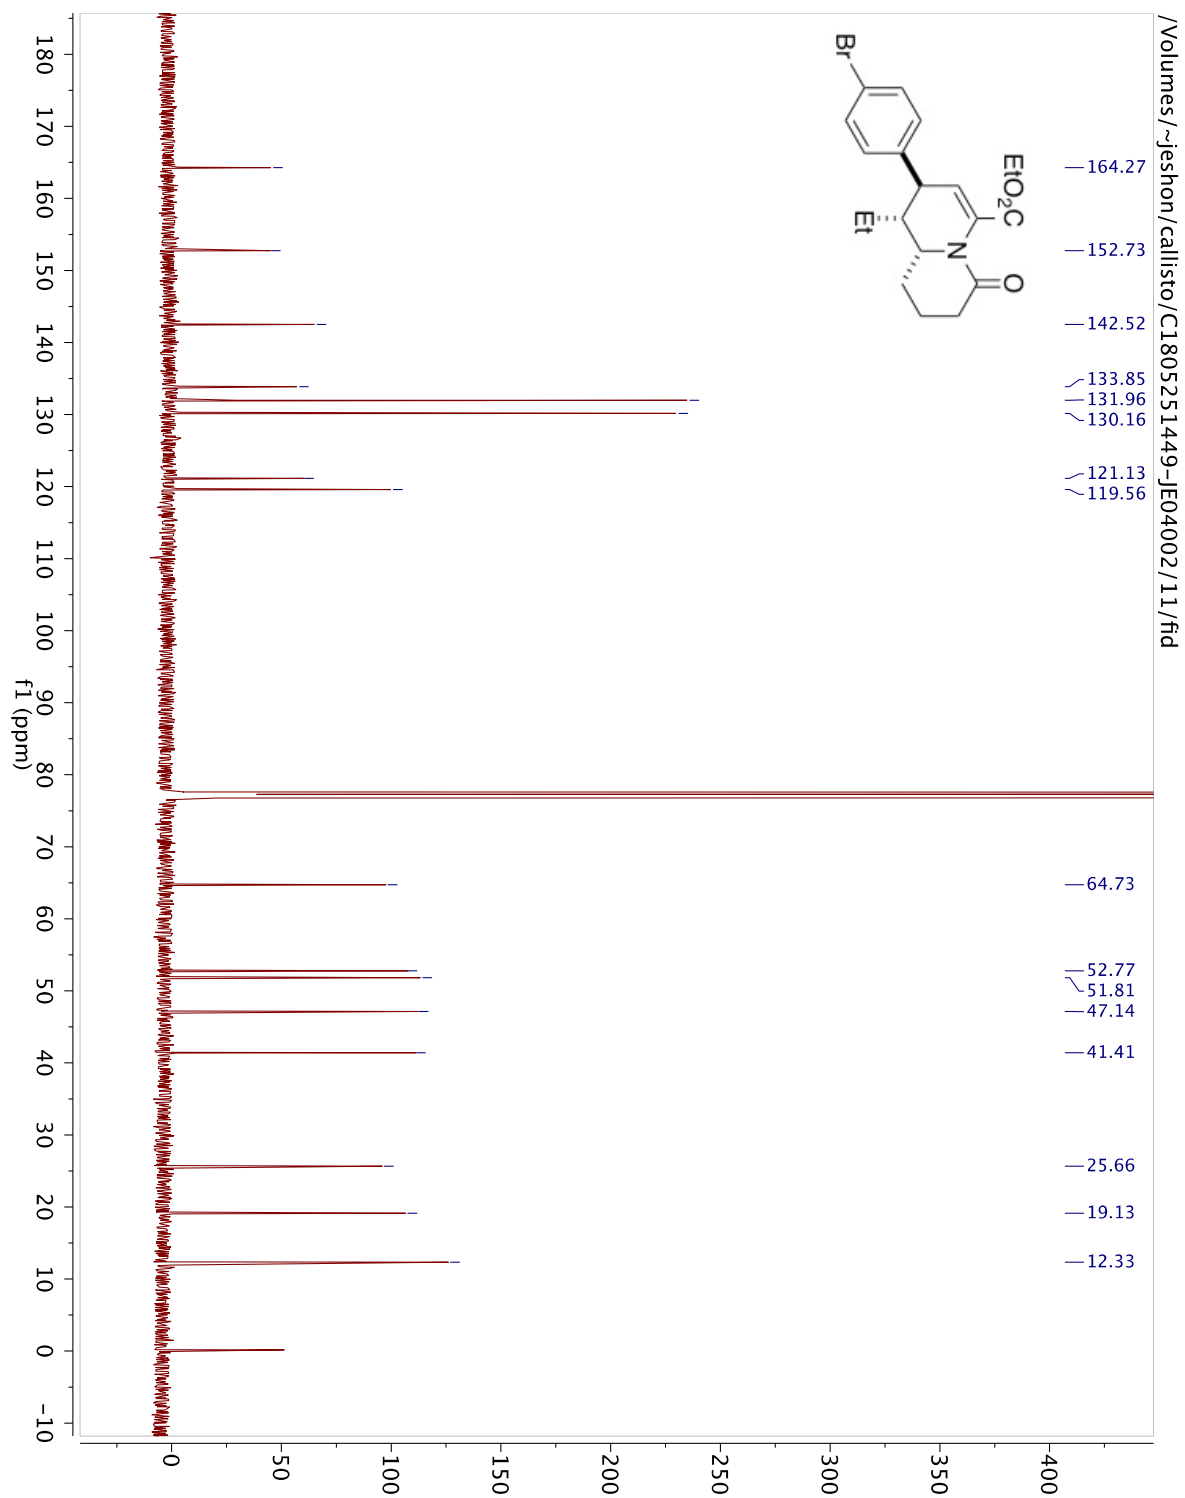

Supplementary Figure 64.  $^1\text{H}$  NMR (500 MHz,  $\text{CDCl}_3$ ) for compound **4cd**

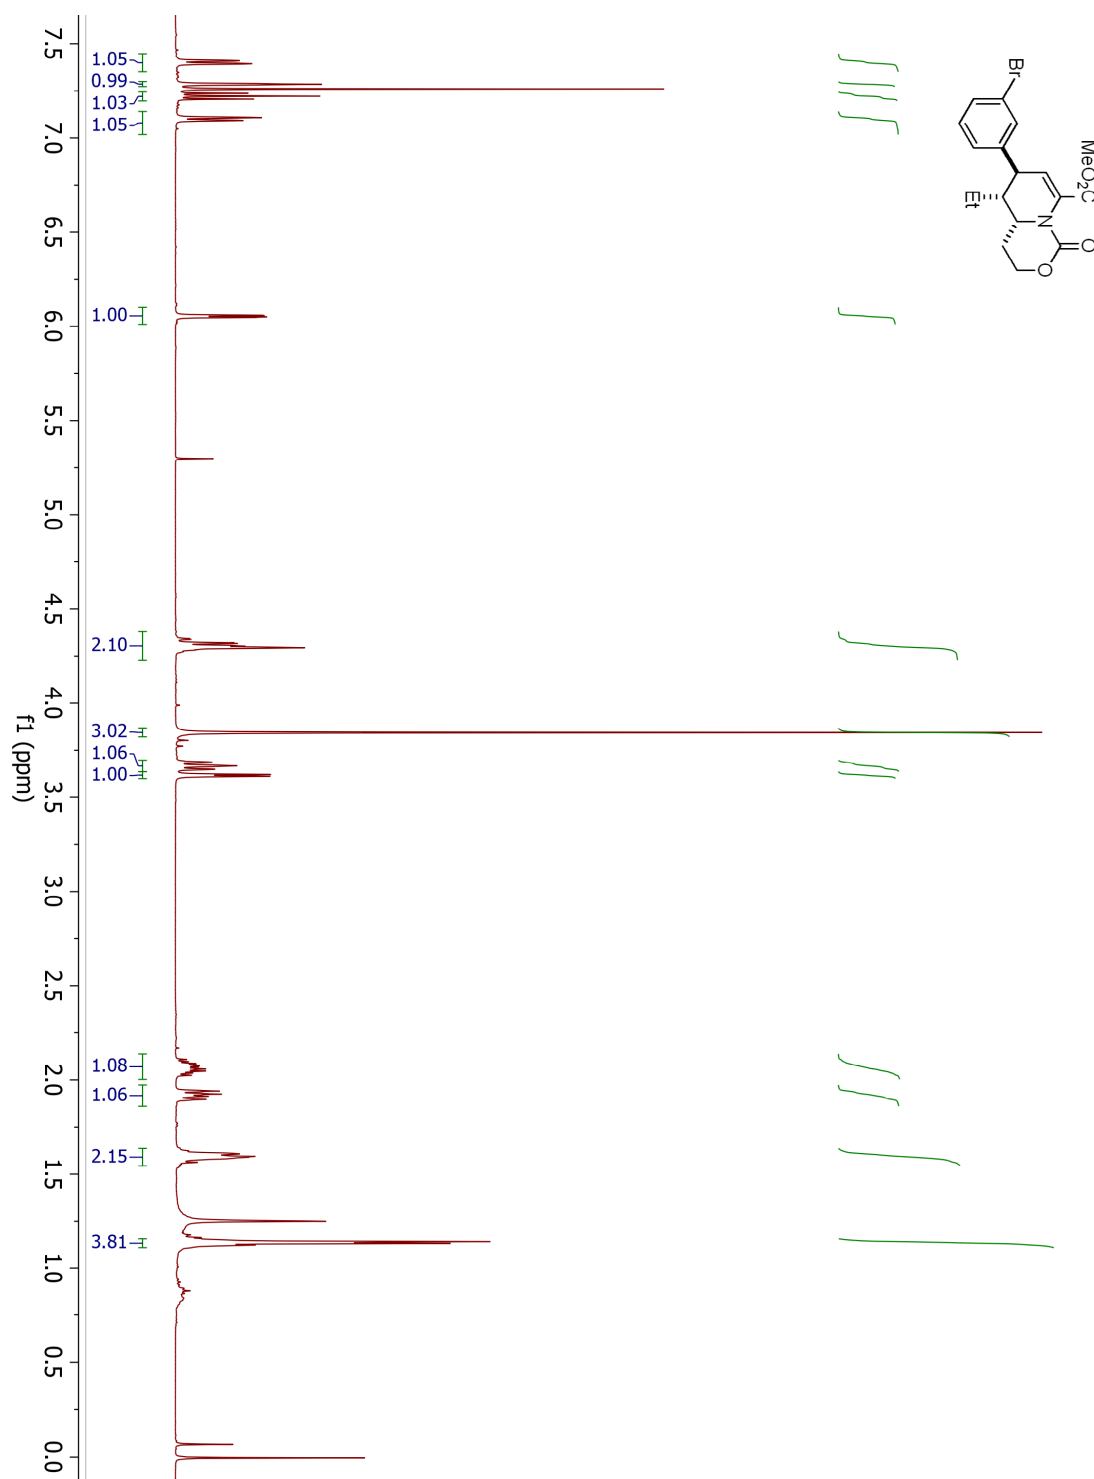

Supplementary Figure 65.  $^{13}\text{C}$  NMR (126 MHz,  $\text{CDCl}_3$ ) for compound **4cd**

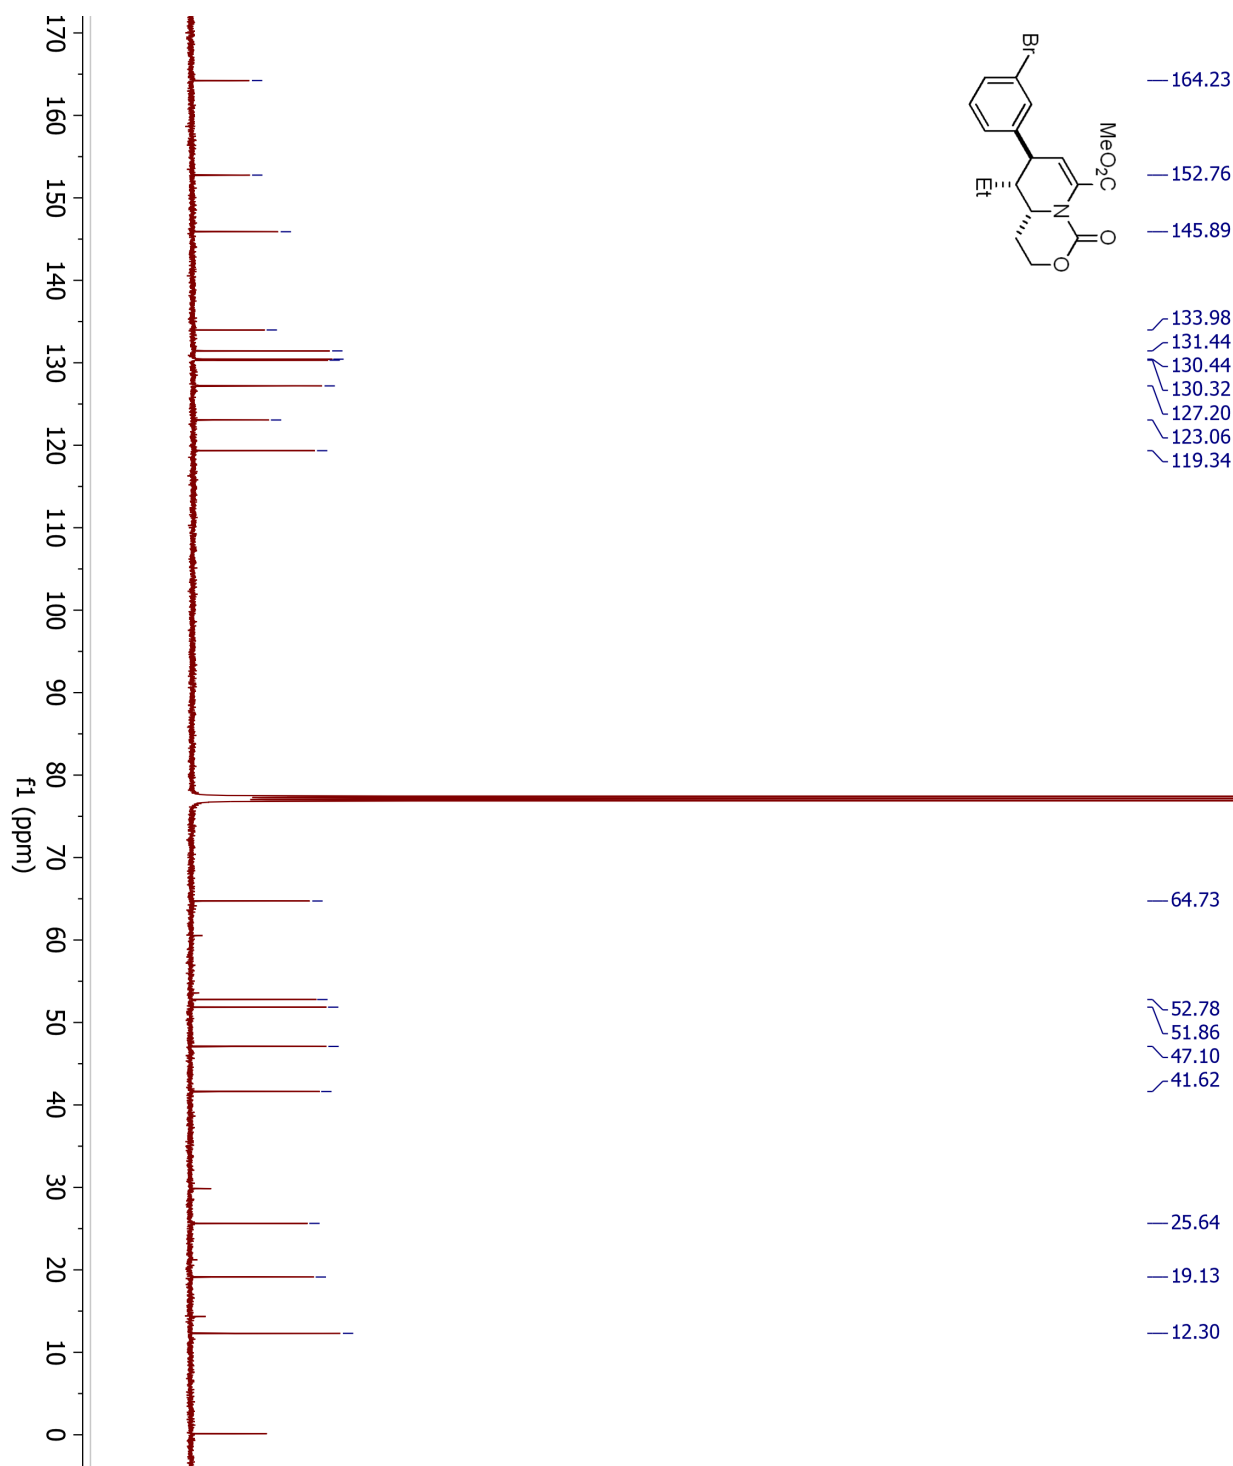

Supplementary Figure 66.  $^1\text{H}$  NMR (500 MHz,  $\text{CDCl}_3$ ) for compound **4ce**

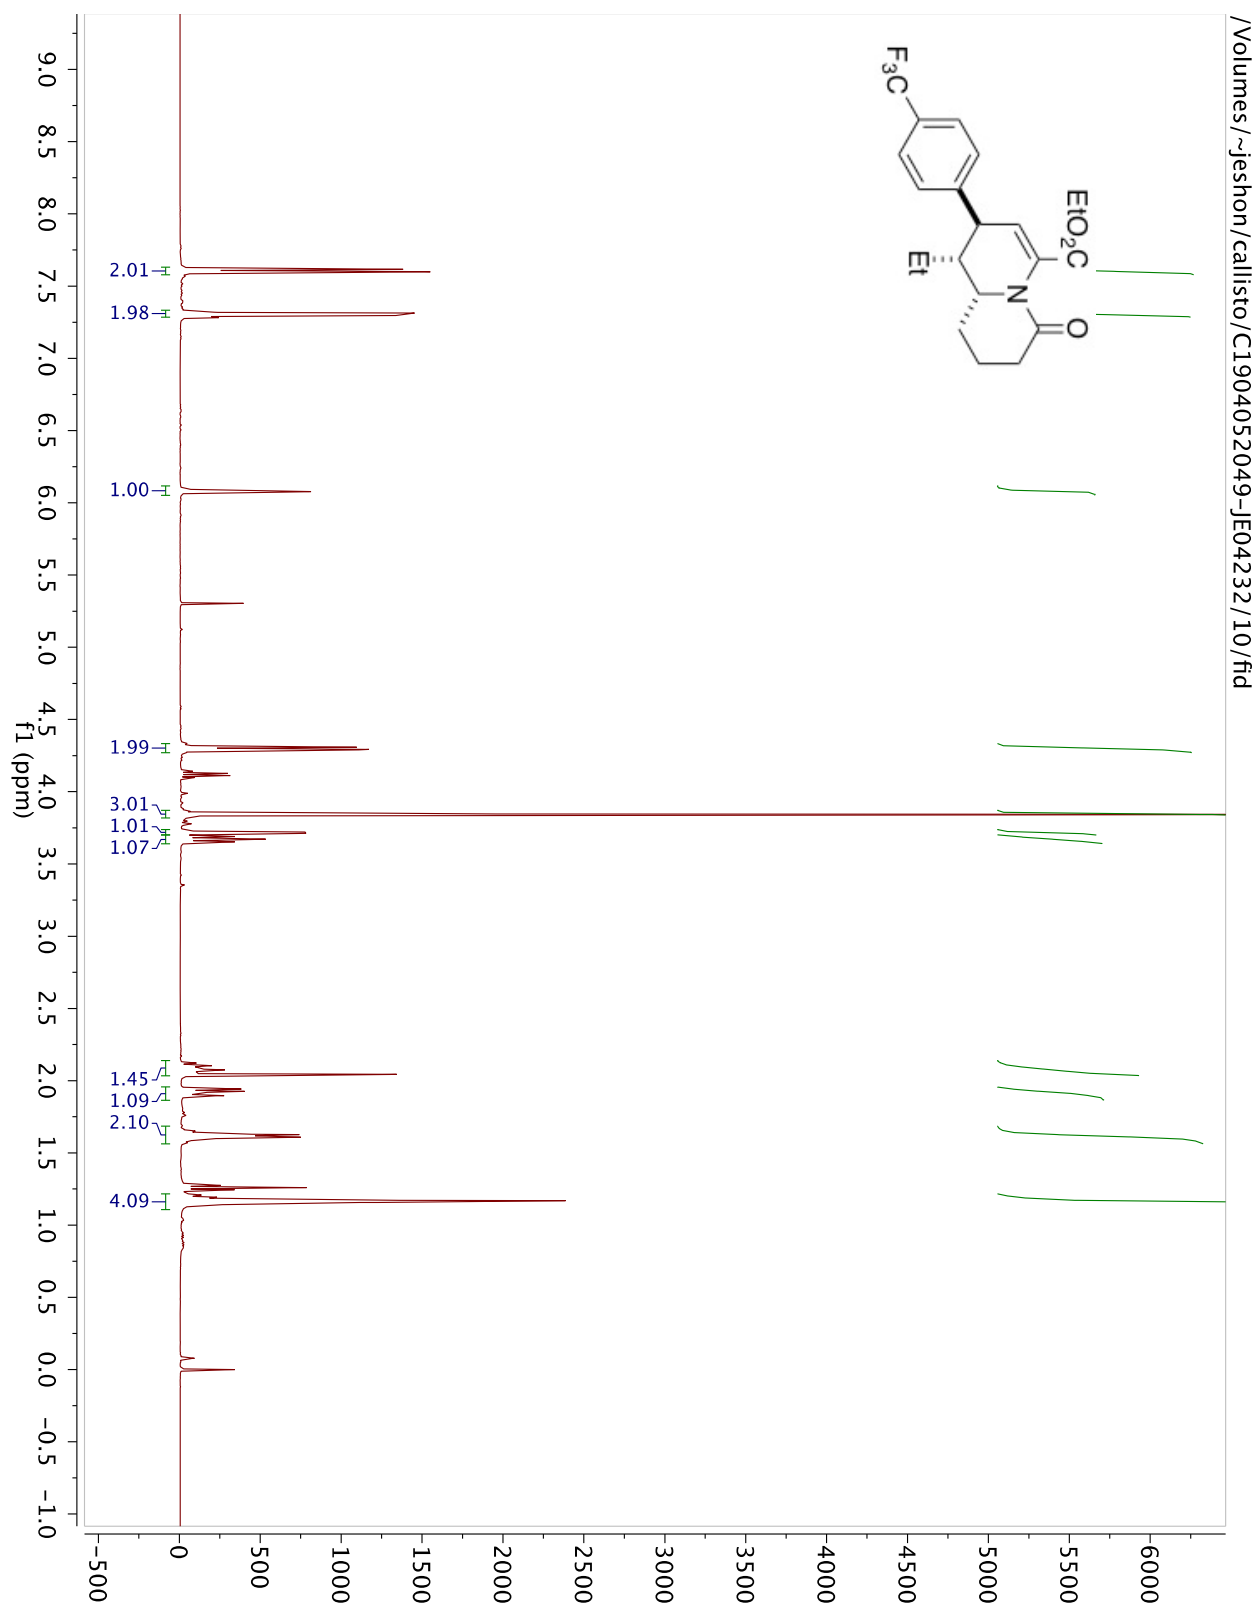

Supplementary Figure 67.  $^{13}\text{C}$  NMR (126 MHz,  $\text{CDCl}_3$ ) for compound **4ce**

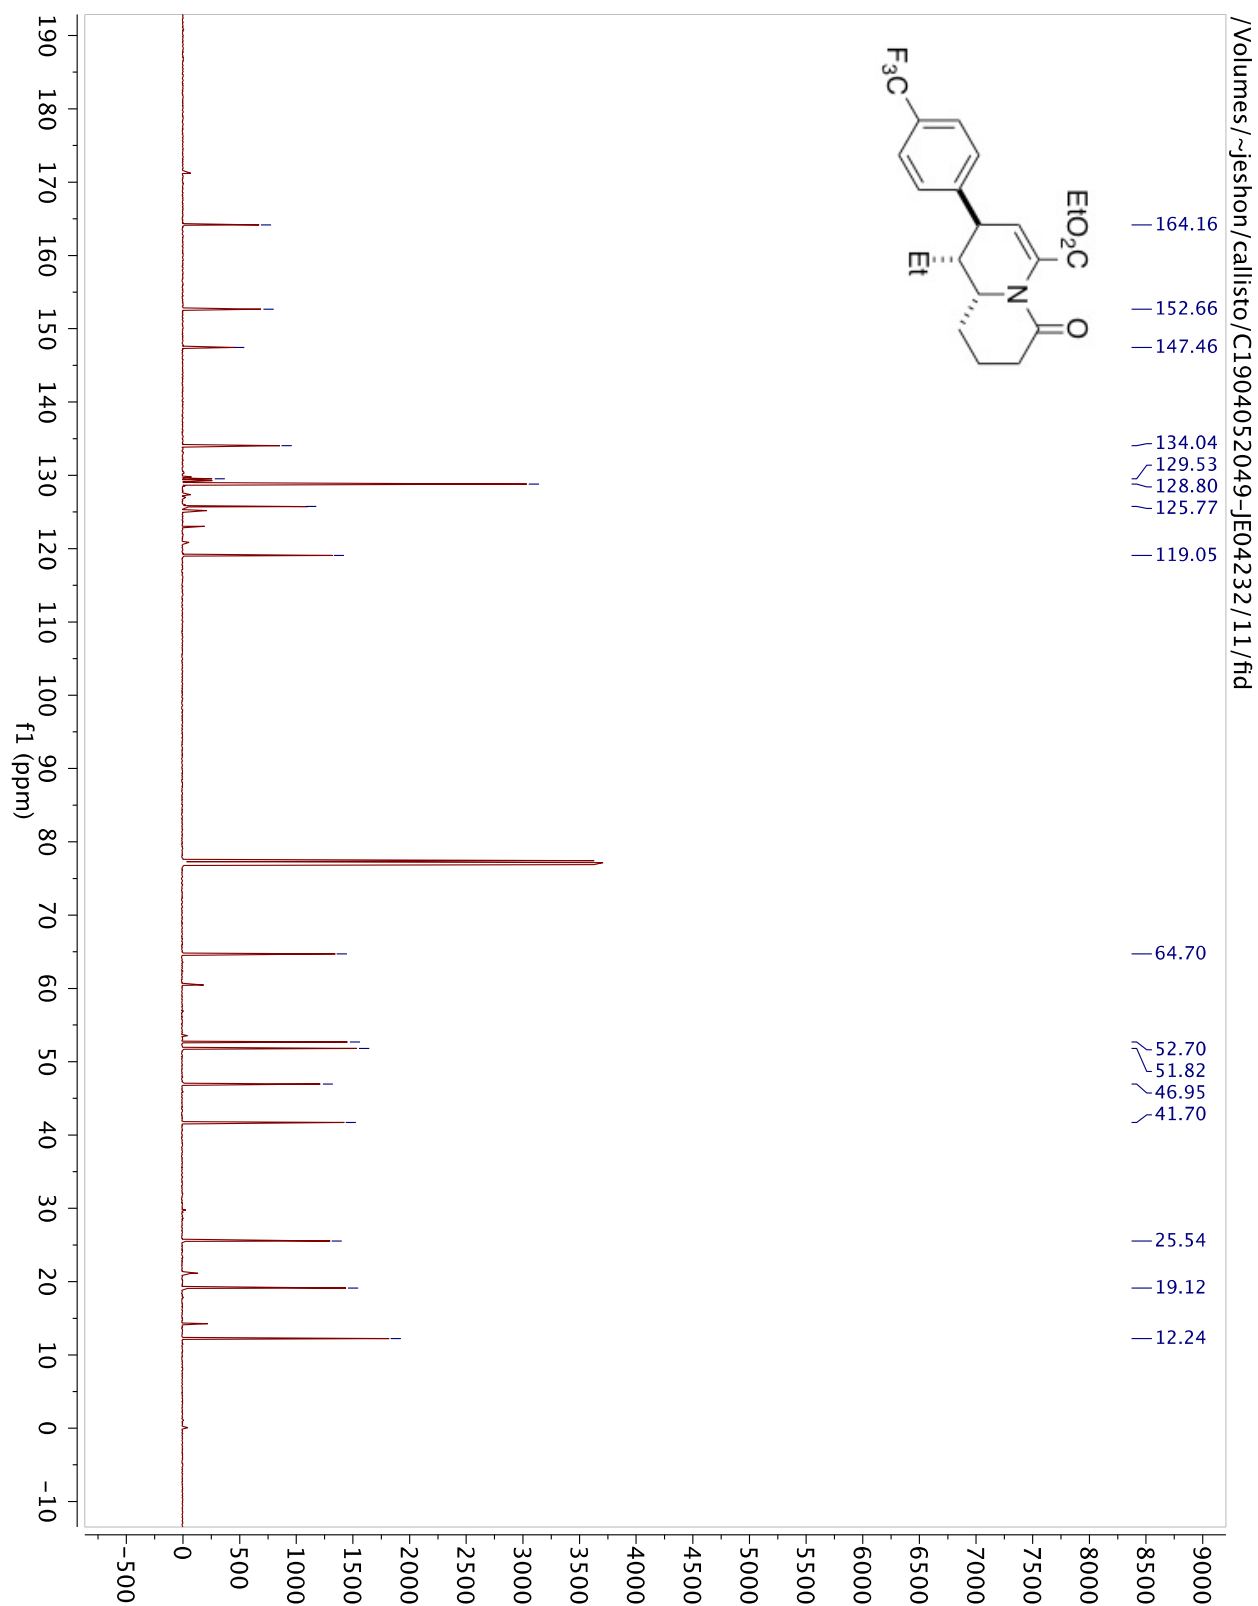

Supplementary Figure 68.  $^1\text{H}$  NMR (500 MHz,  $\text{CDCl}_3$ ) for compound **4cf**

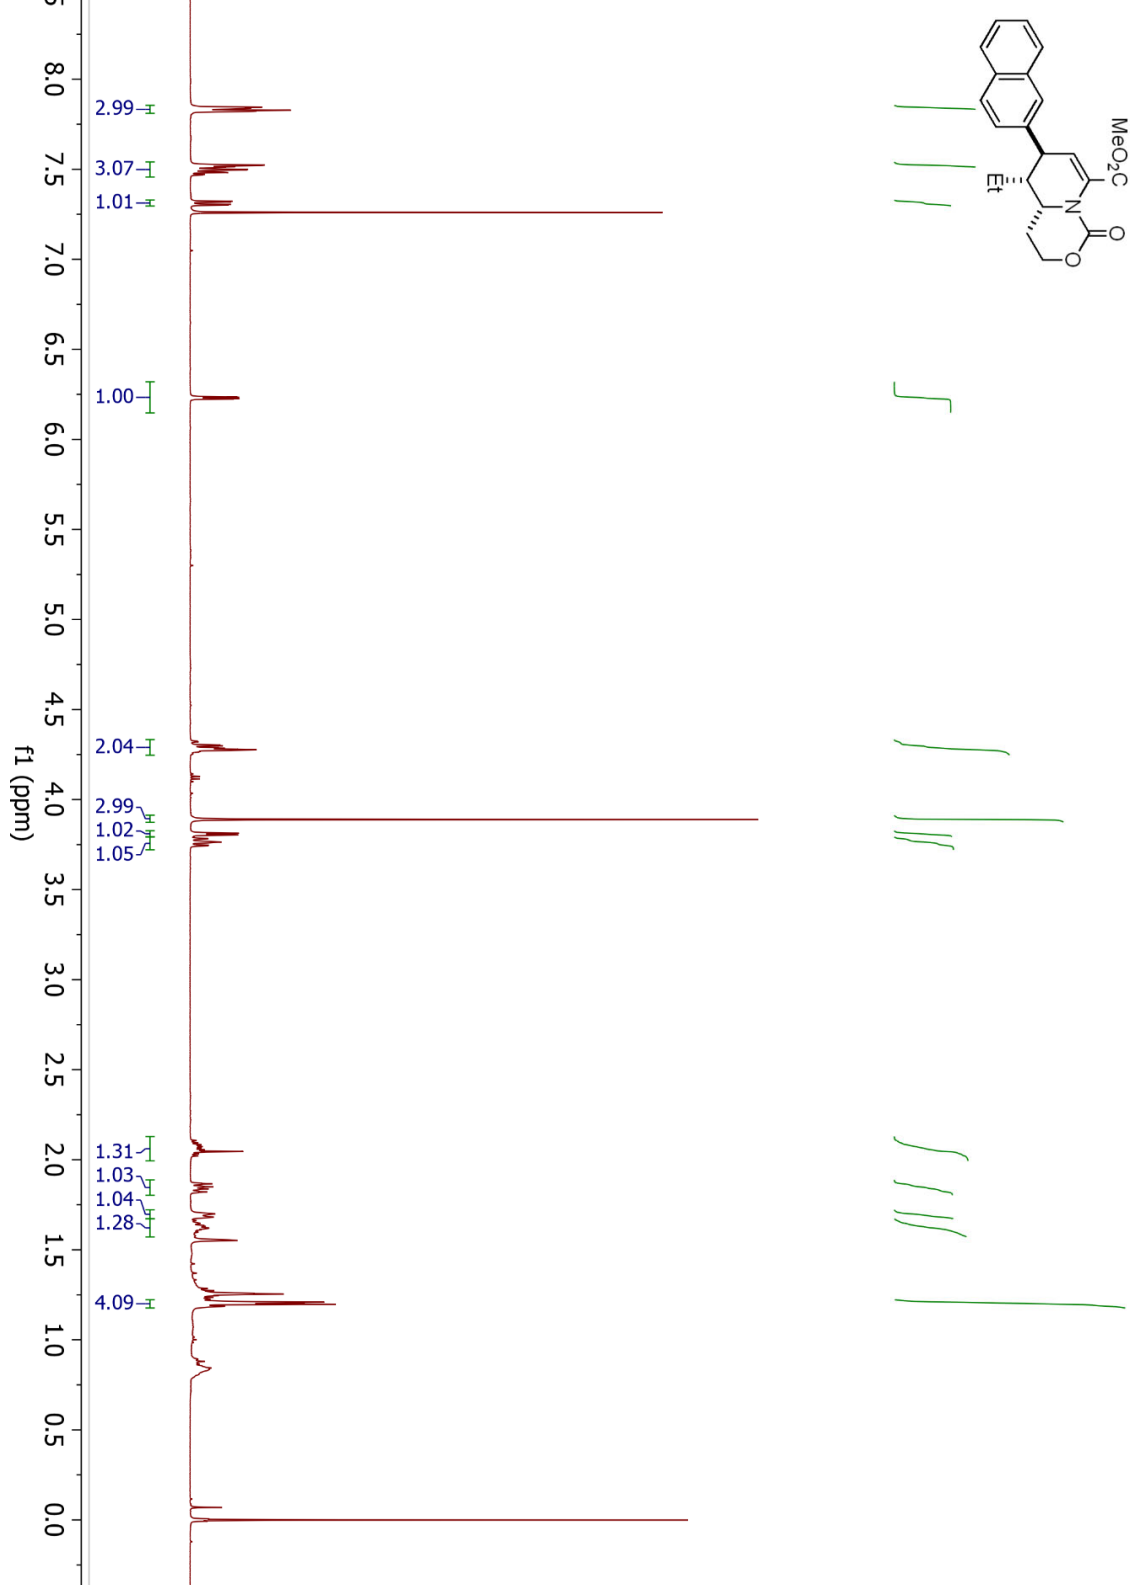

Supplementary Figure 69.  $^{13}\text{C}$  NMR (126 MHz,  $\text{CDCl}_3$ ) for compound **4cf**

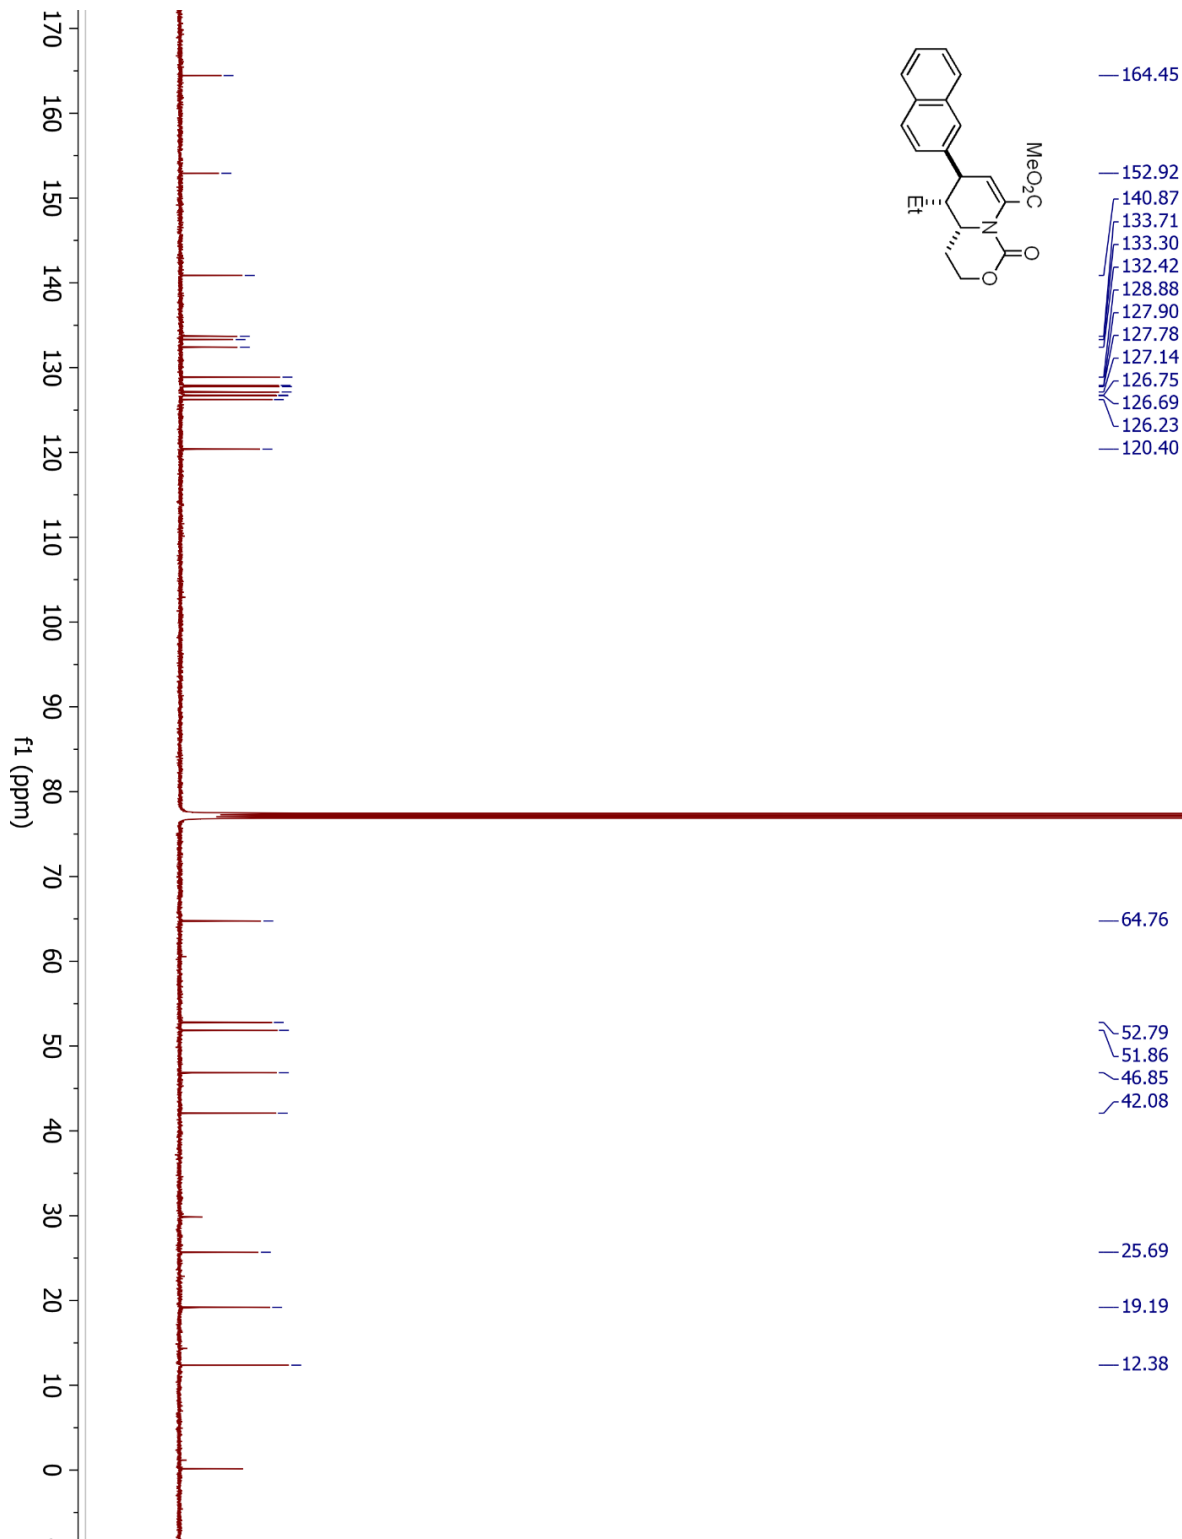

Supplementary Figure 70.  $^1\text{H}$  NMR (500 MHz,  $\text{CDCl}_3$ ) for compound **4cg**

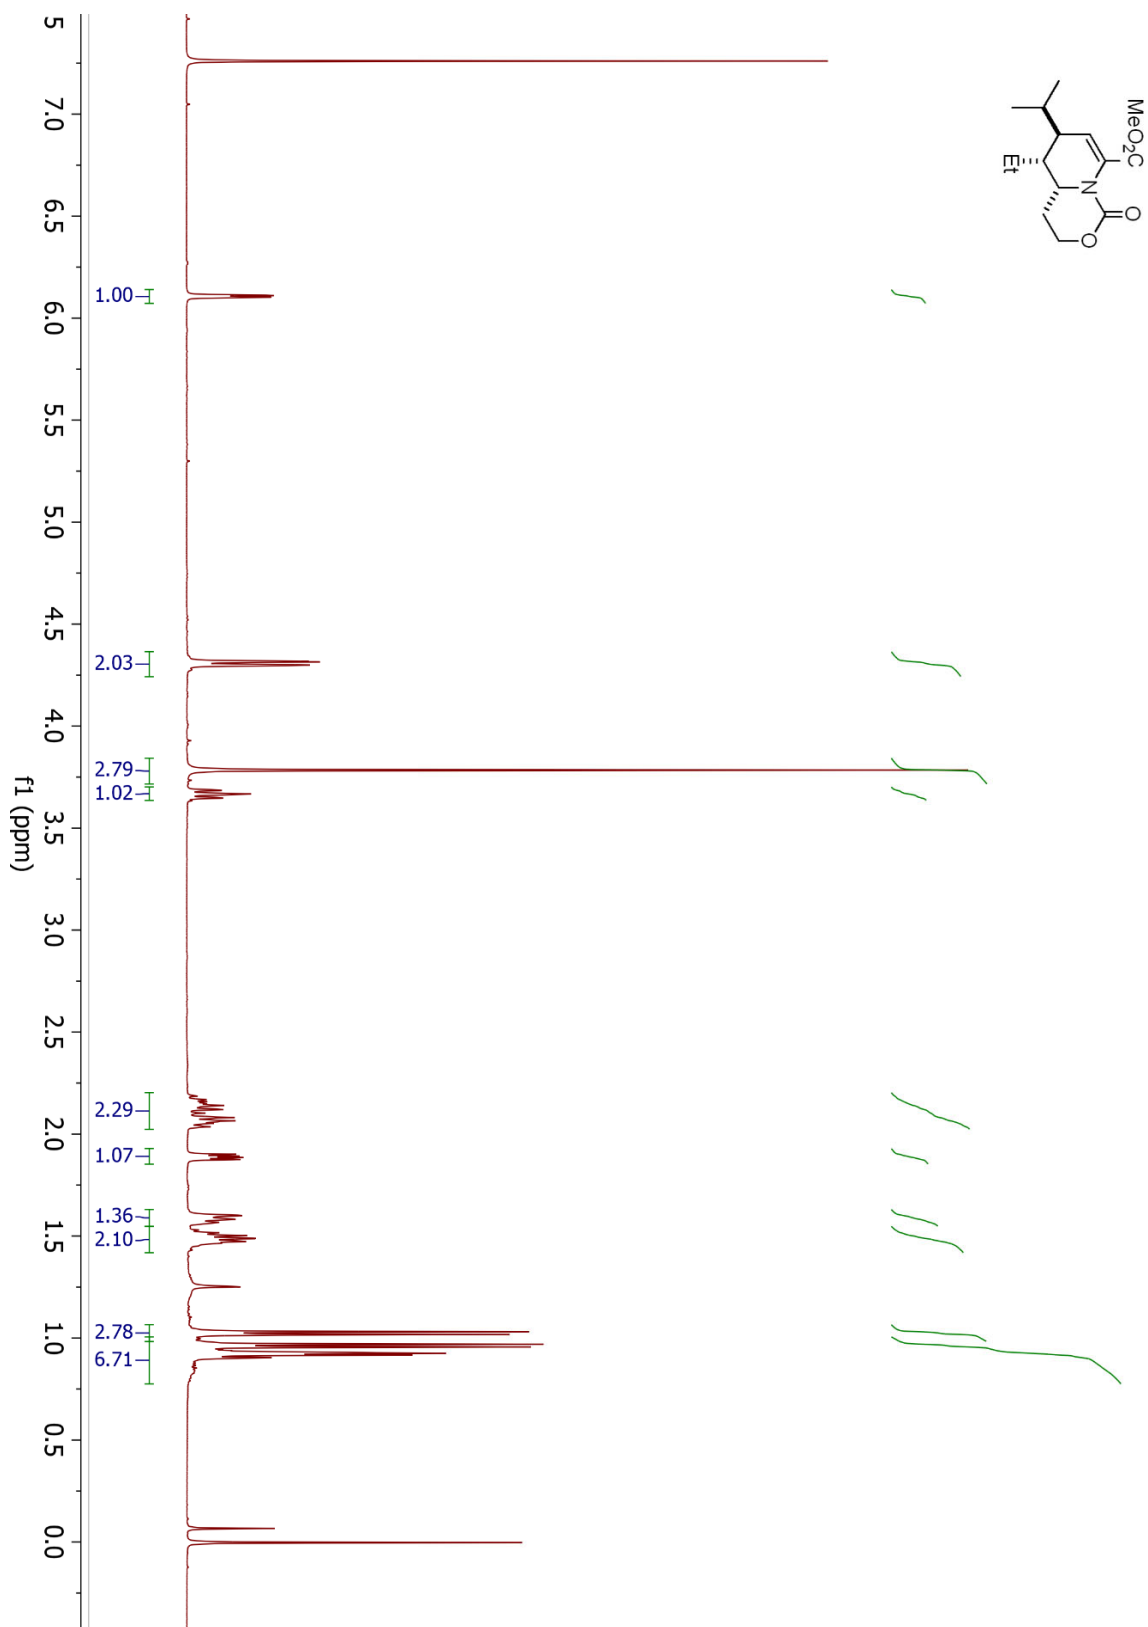

Supplementary Figure 71.  $^{13}\text{C}$  NMR (126 MHz,  $\text{CDCl}_3$ ) for compound **4cg**

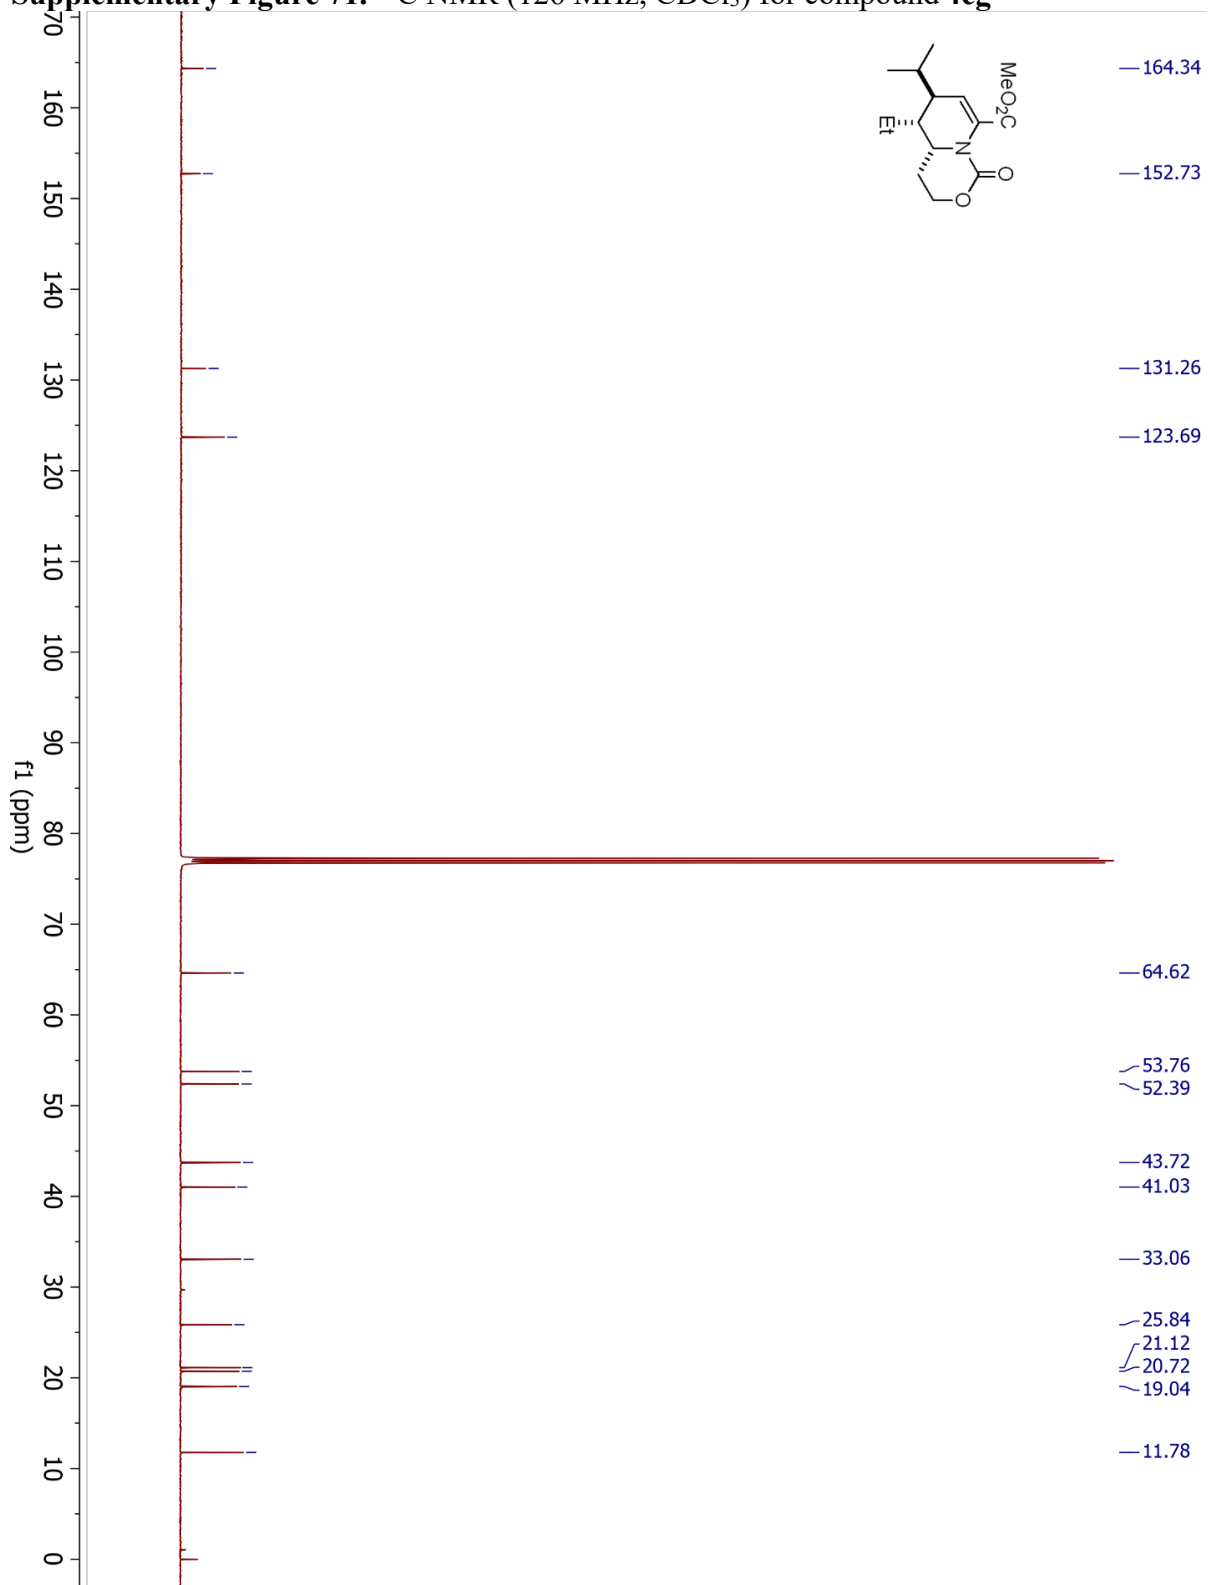

Supplementary Figure 72.  $^1\text{H}$  NMR (500 MHz,  $\text{CDCl}_3$ ) for Compound 4ch

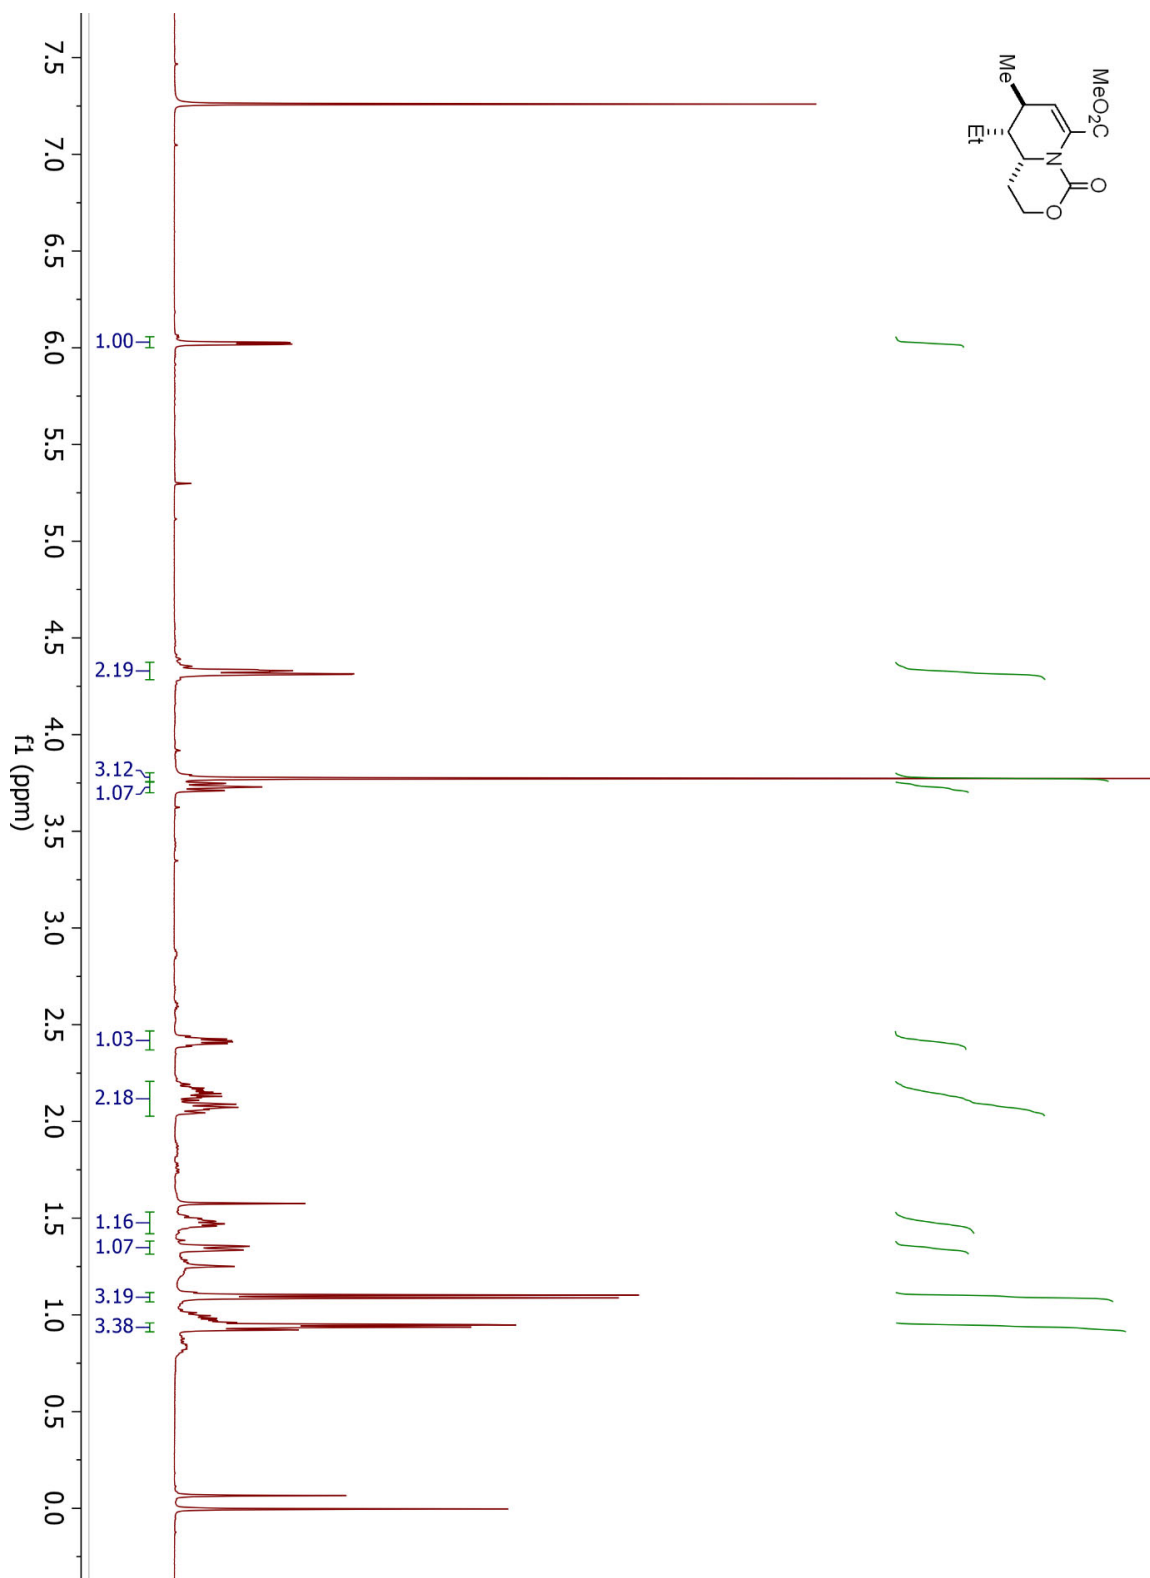

**Supplementary Figure 73.**  $^{13}\text{C}$  NMR (126 MHz,  $\text{CDCl}_3$ ) for compound **4ch**

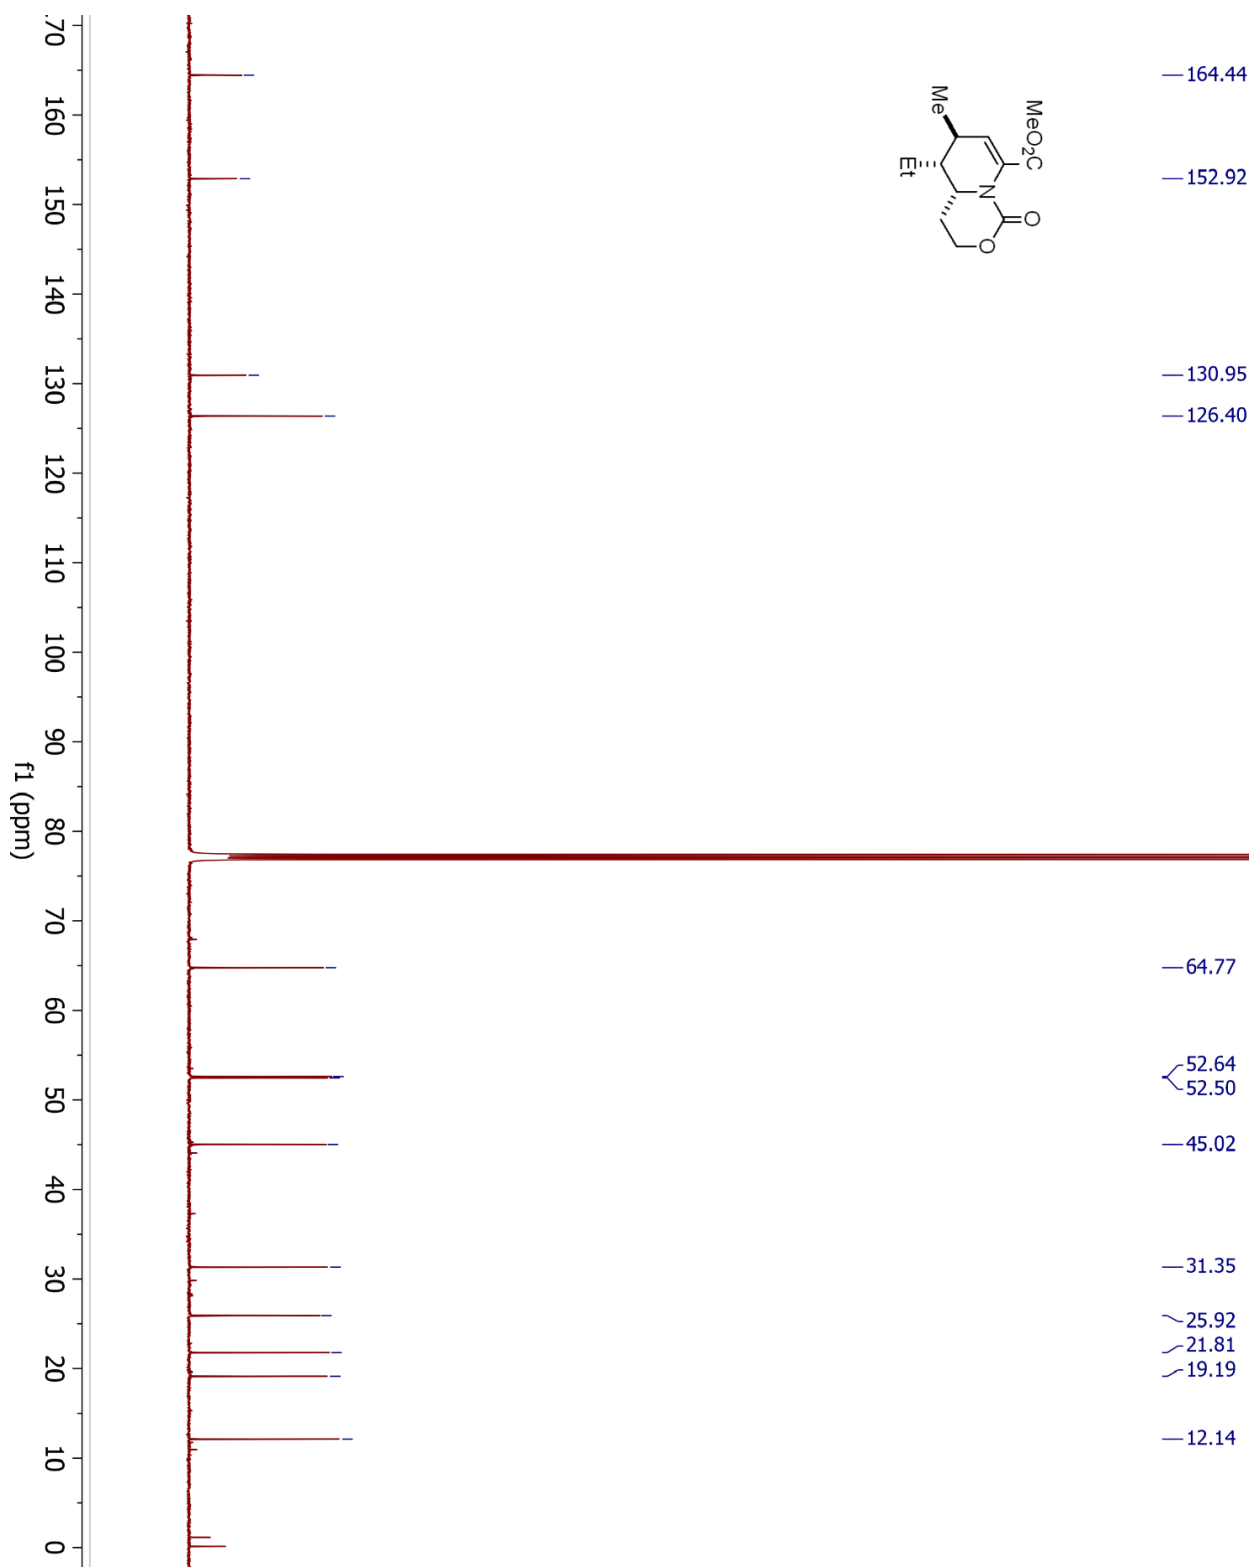

Supplementary Figure 74.  $^1\text{H}$  NMR (500 MHz,  $\text{CDCl}_3$ ) for compound **4ci**

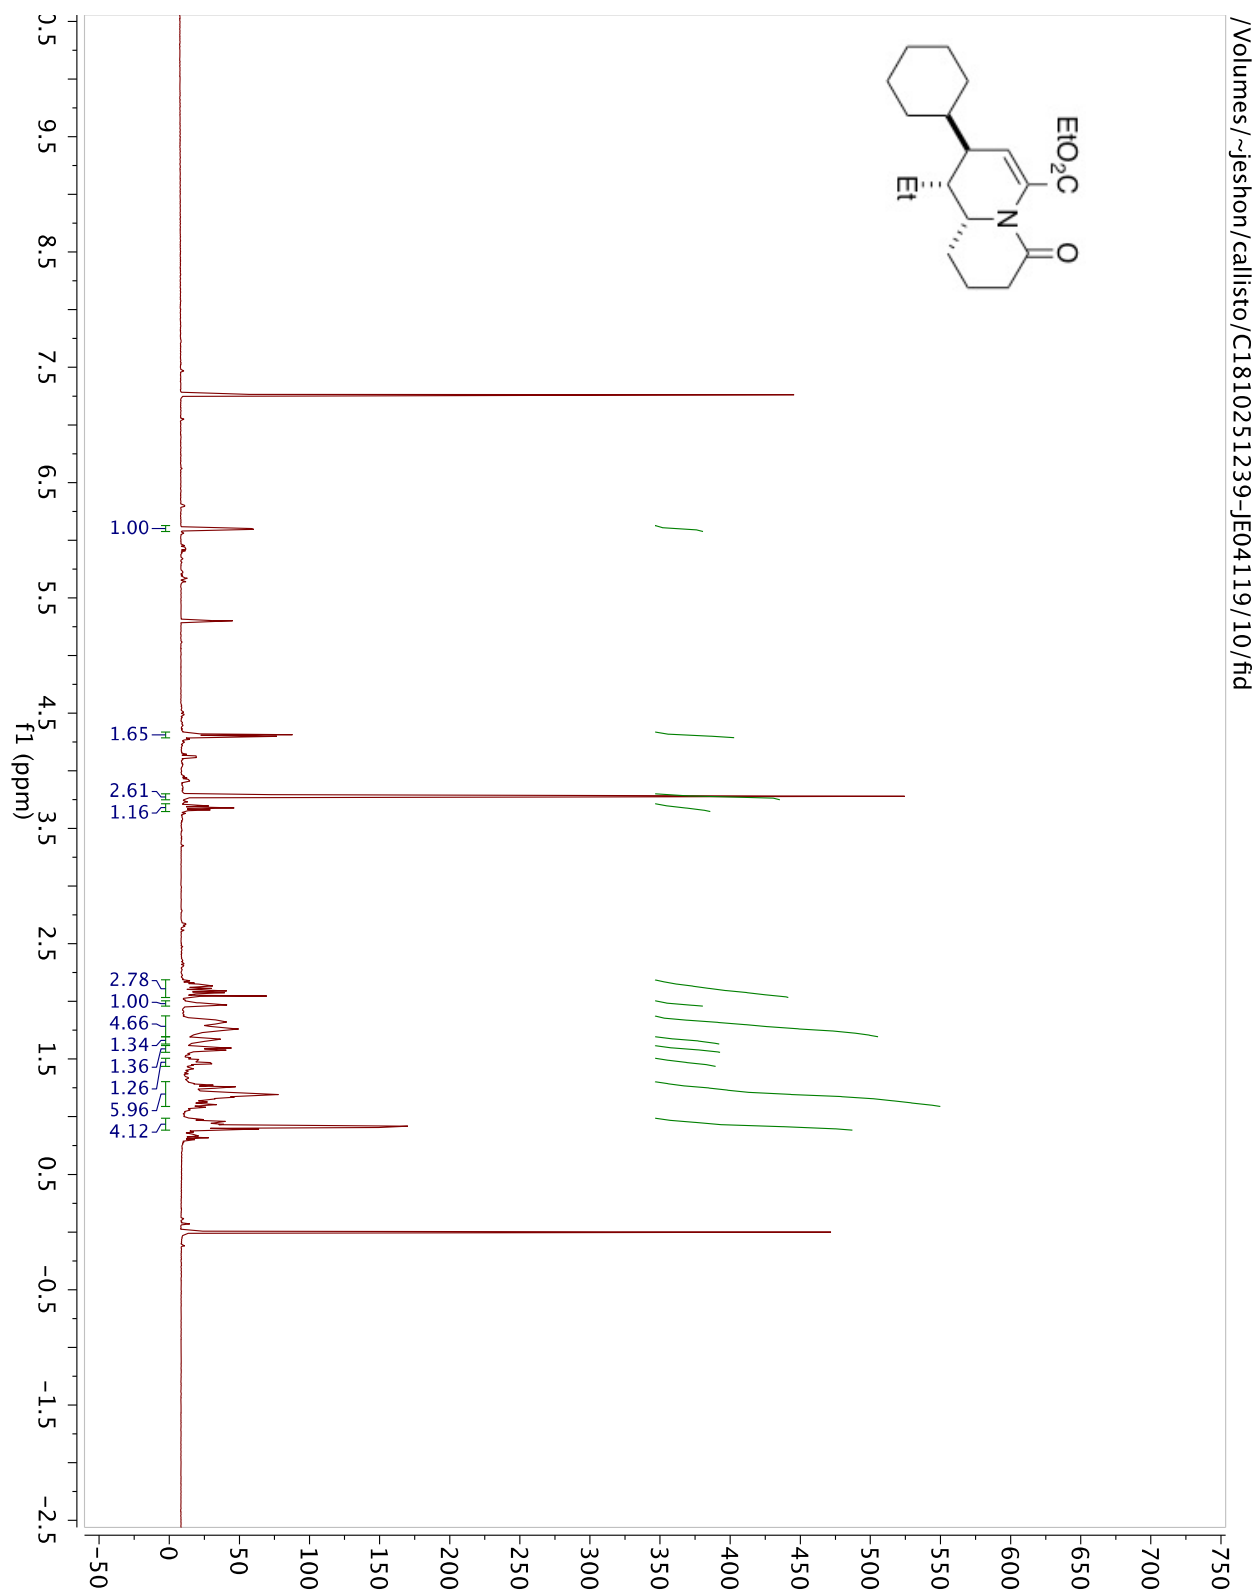

**Supplementary Figure 75.**  $^{13}\text{C}$  NMR (126 MHz,  $\text{CDCl}_3$ ) for compound **4ci**

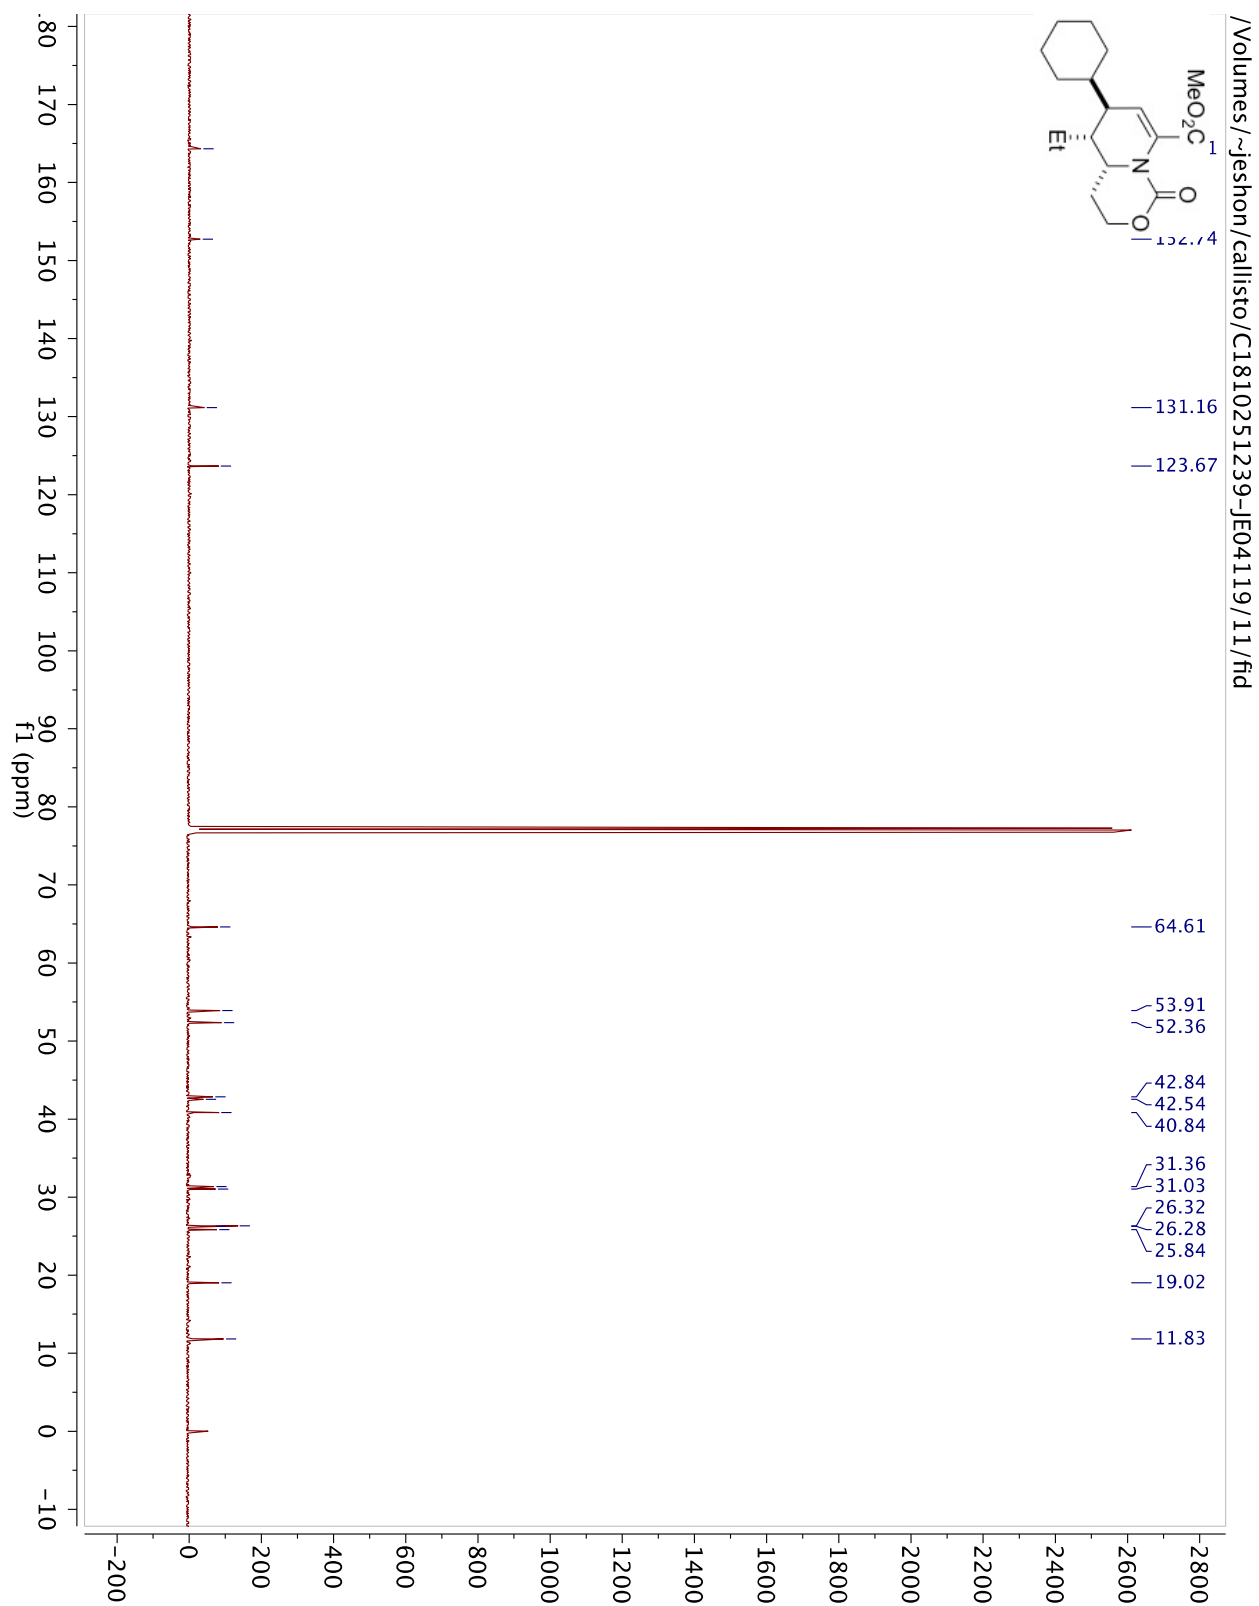

Supplementary Figure 76.  $^1\text{H}$  NMR (500 MHz,  $\text{CDCl}_3$ ) for compound **4cj**

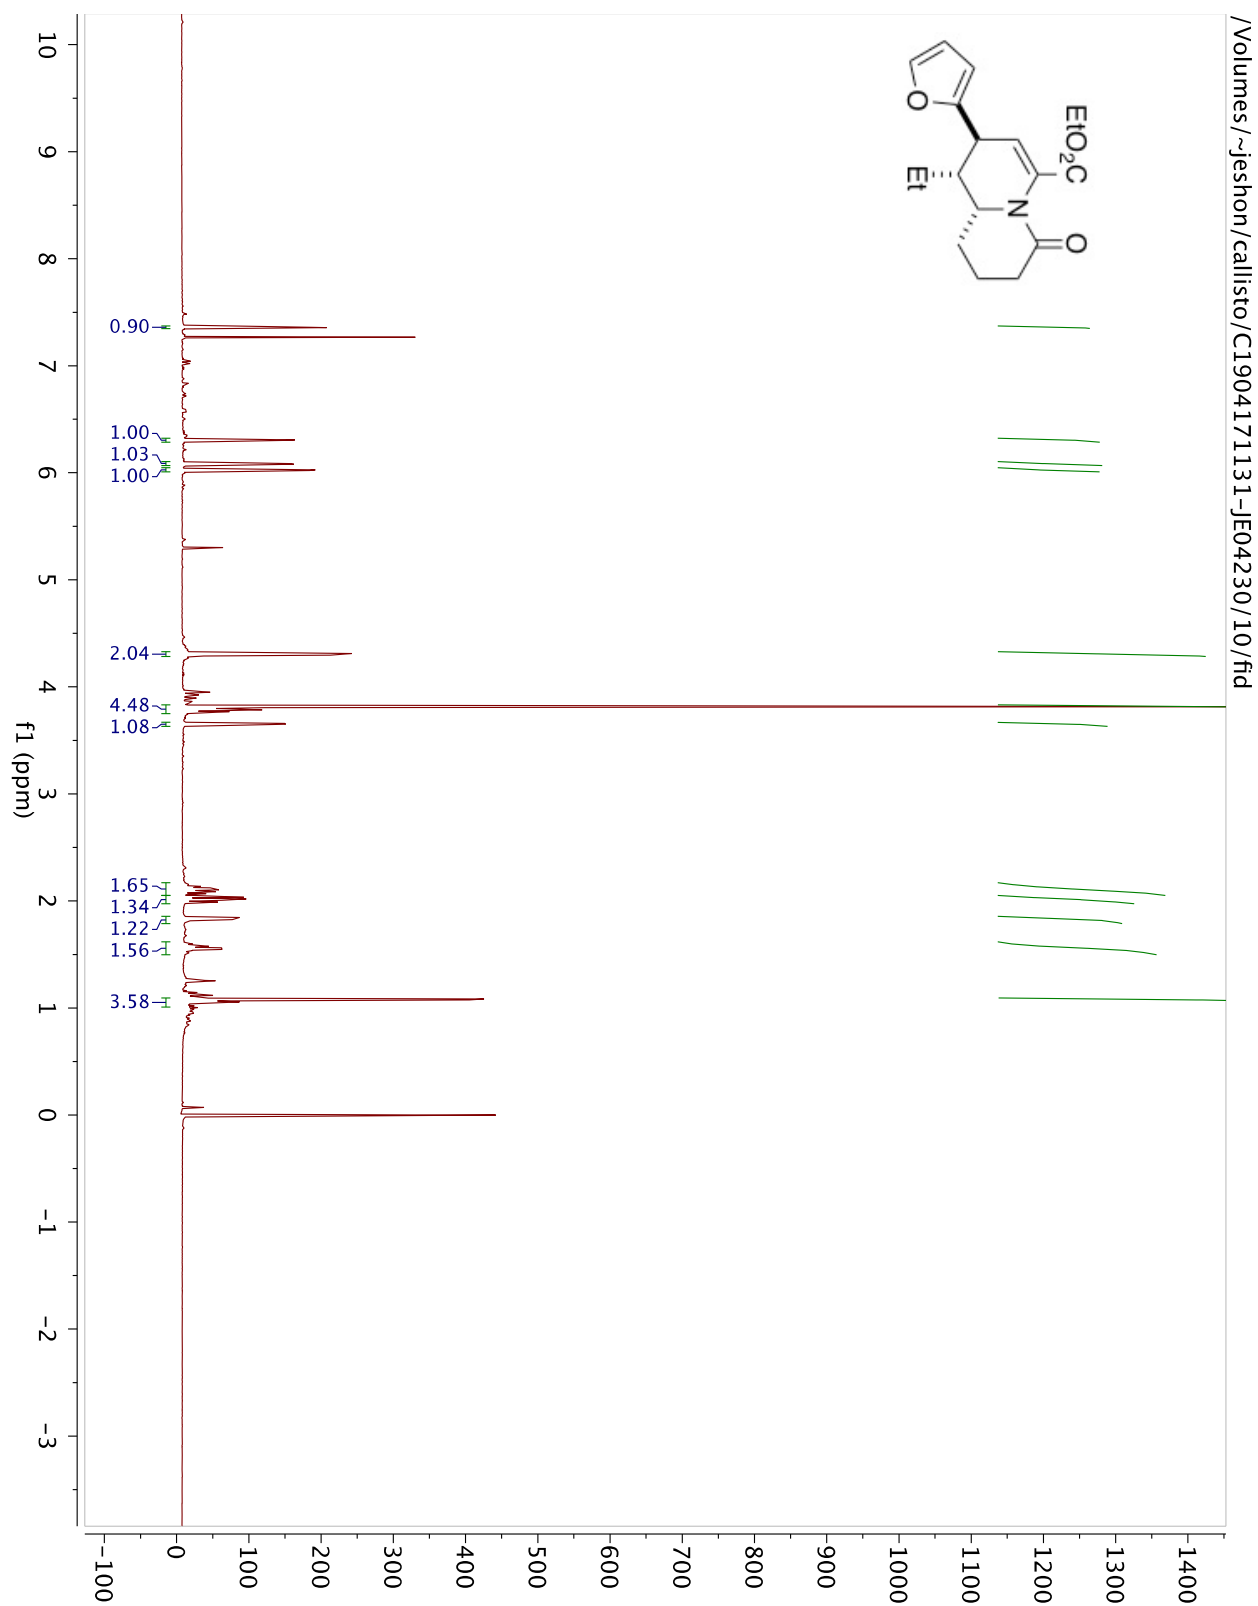

Supplementary Figure 77.  $^{13}\text{C}$  NMR (126 MHz,  $\text{CDCl}_3$ ) for compound **4cj**

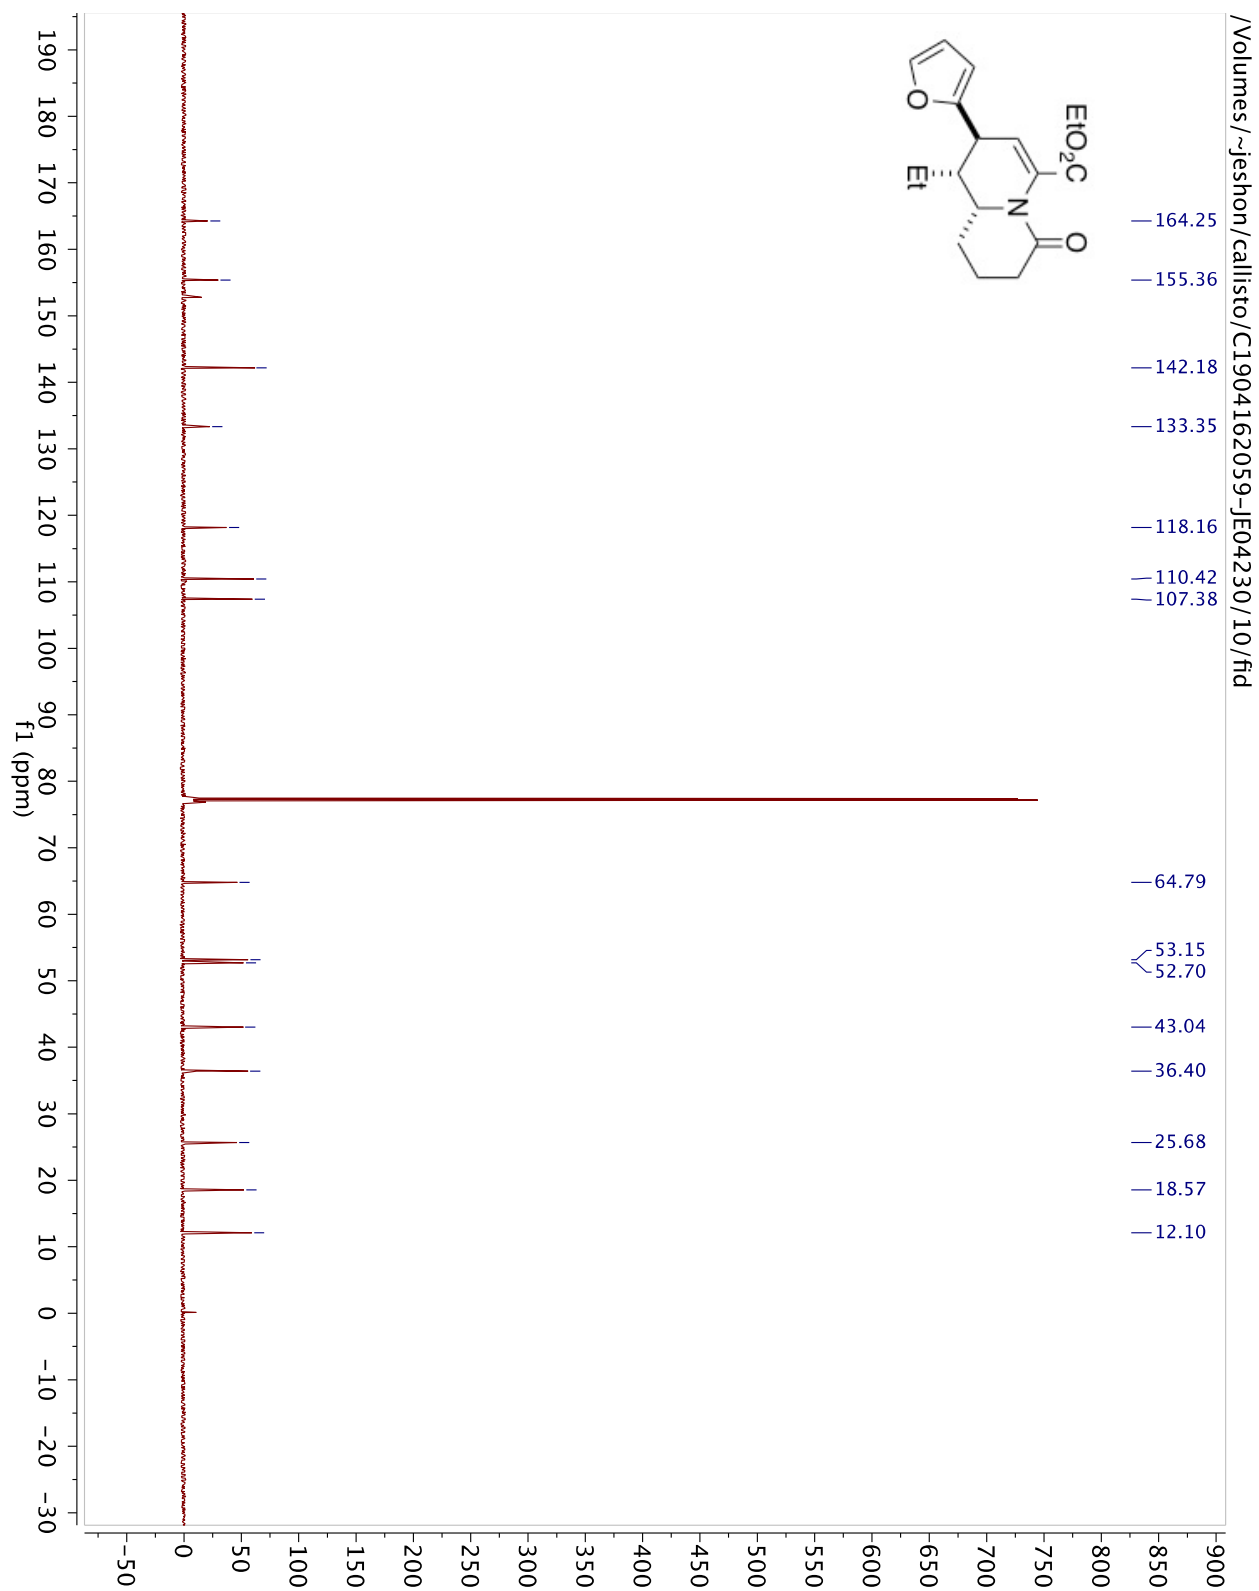

**Supplementary Figure 78.**  $^1\text{H}$  NMR (500 MHz,  $\text{CDCl}_3$ ) for compound **4ck**

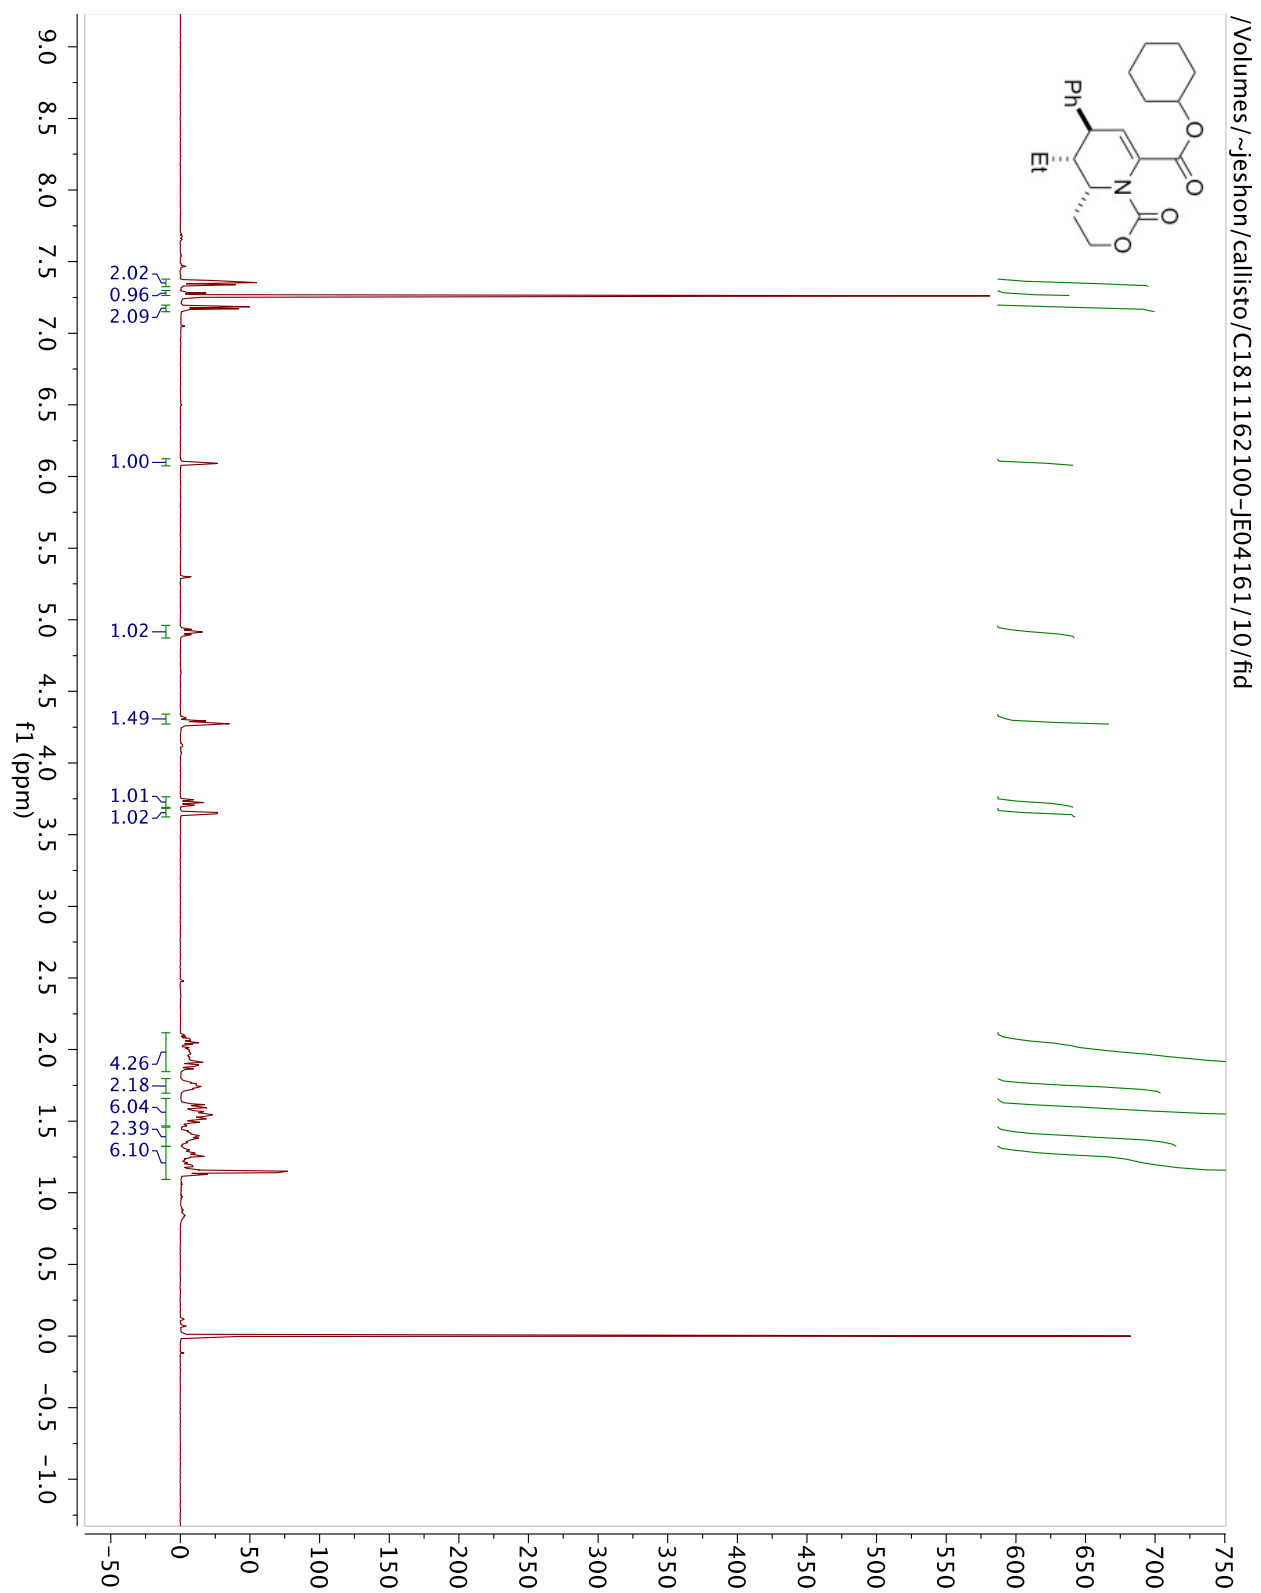

Supplementary Figure 79.  $^{13}\text{C}$  NMR (126 MHz,  $\text{CDCl}_3$ ) for compound 4ck

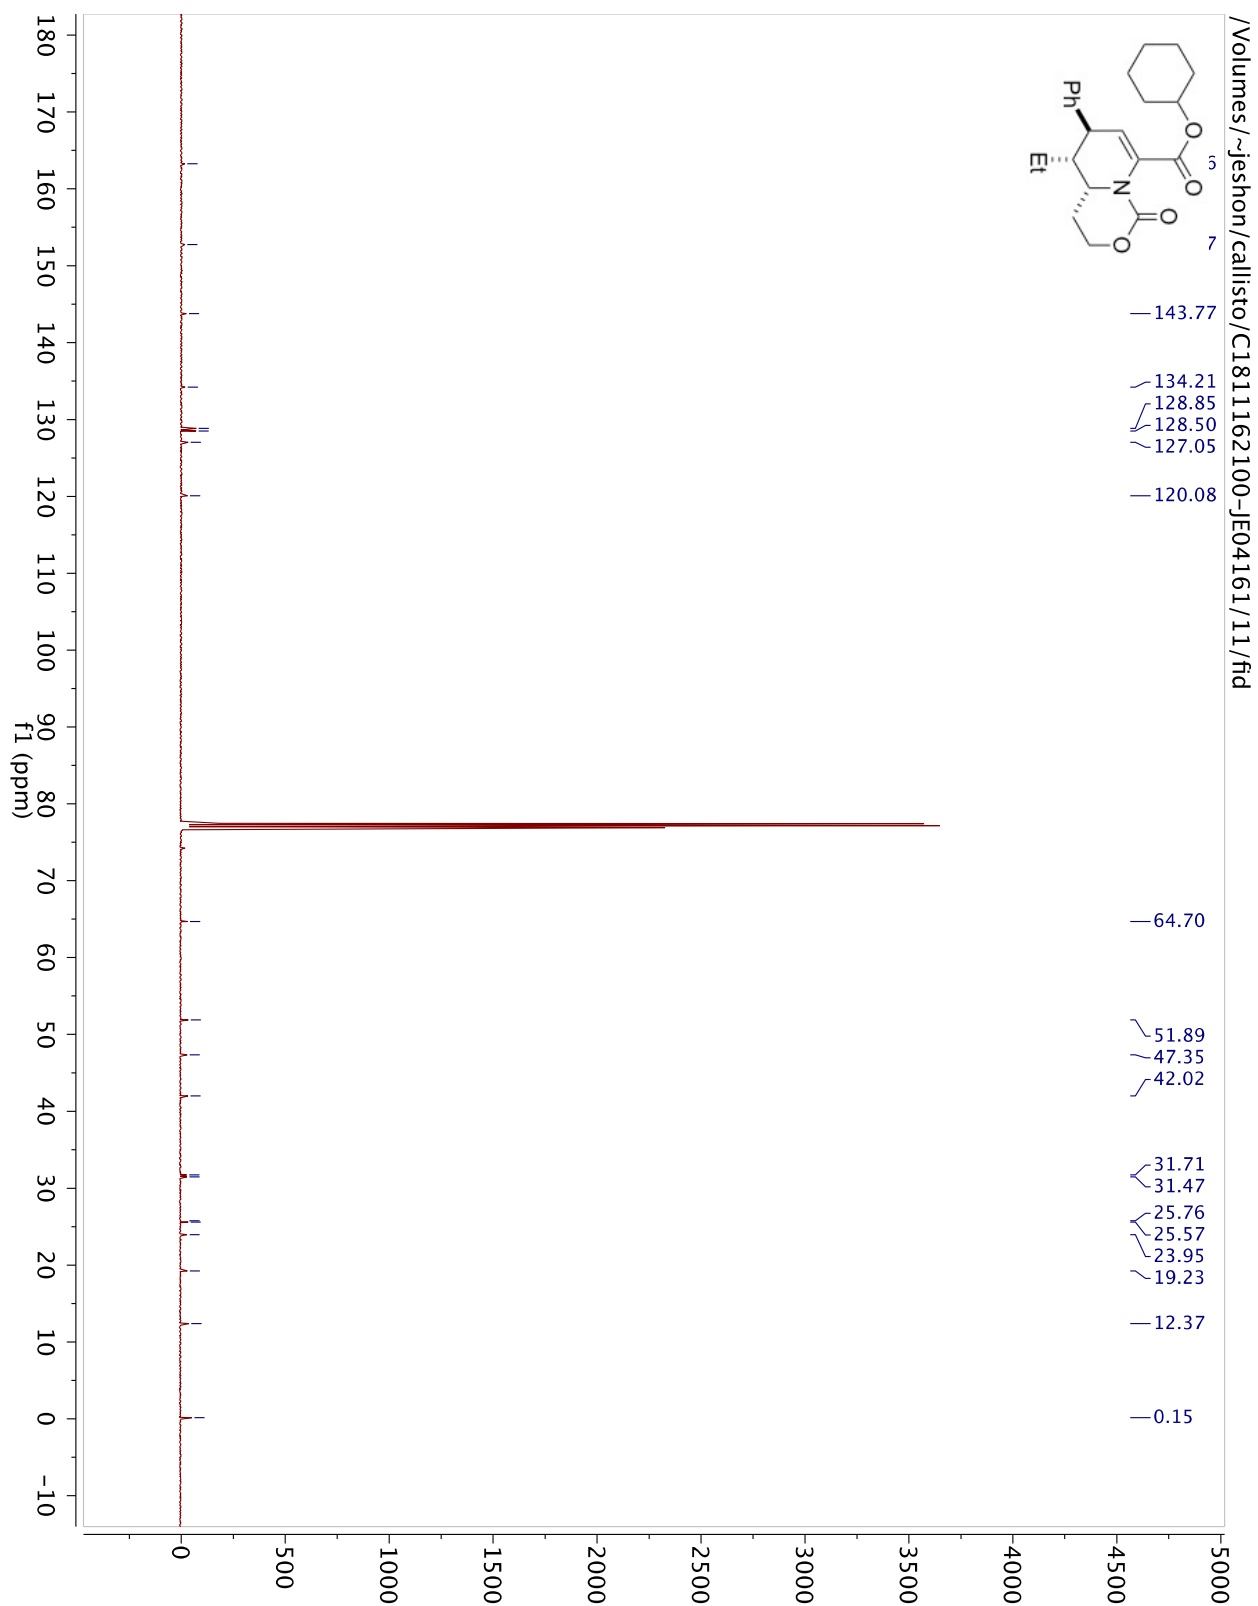

Supplementary Figure 80.  $^1\text{H}$  NMR (500 MHz,  $\text{CDCl}_3$ ) for compound 6

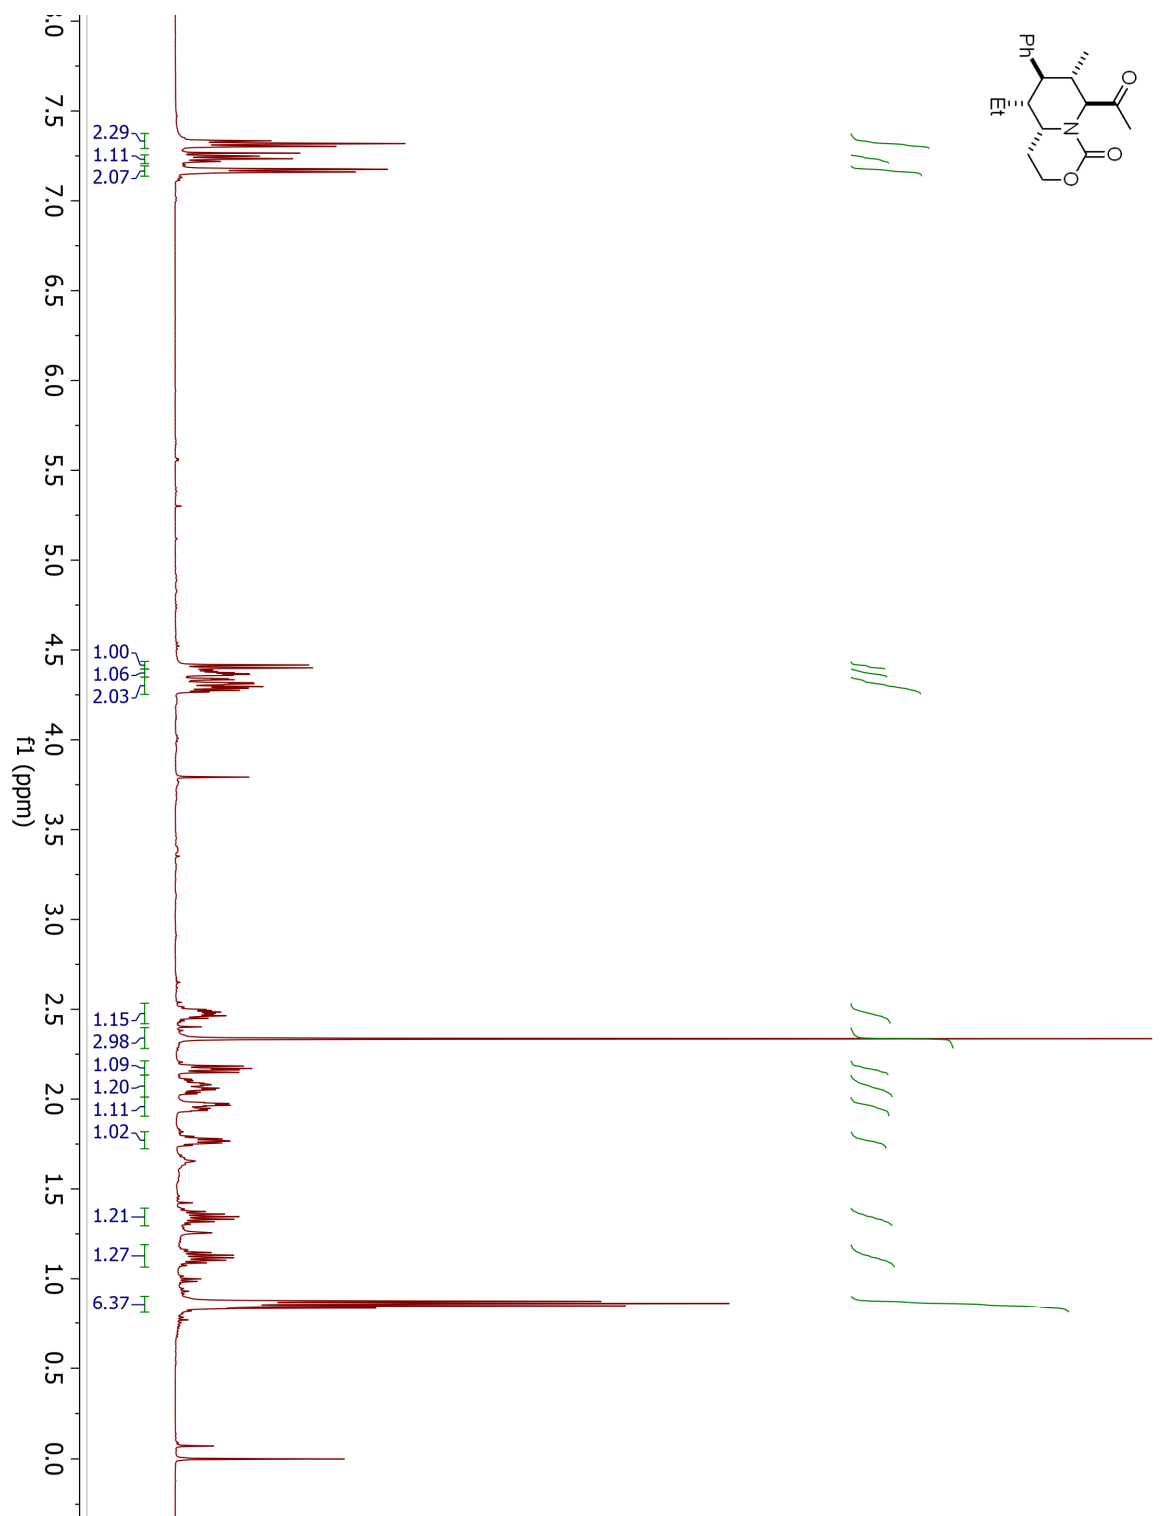

**Supplementary Figure 81.**  $^{13}\text{C}$  NMR (126 MHz,  $\text{CDCl}_3$ ) for compound **6**

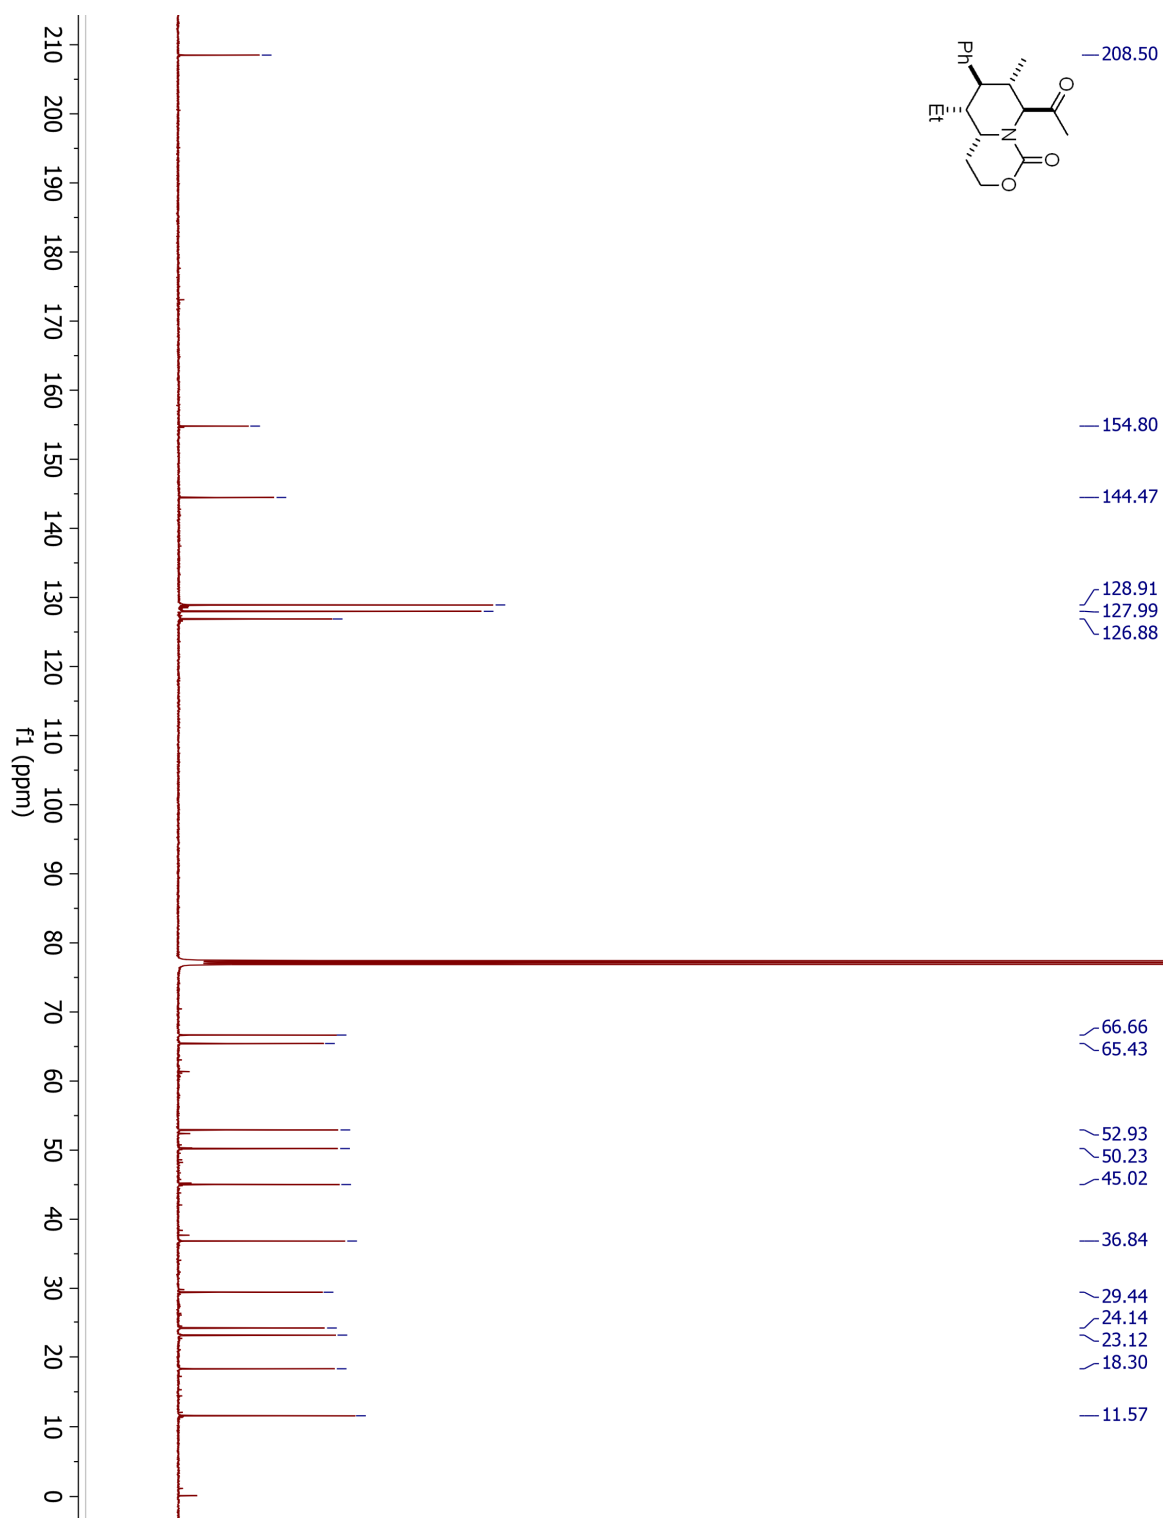

**Supplementary Figure 82.**  $^1\text{H}$  NMR (500 MHz,  $\text{CDCl}_3$ ) for compound **7**

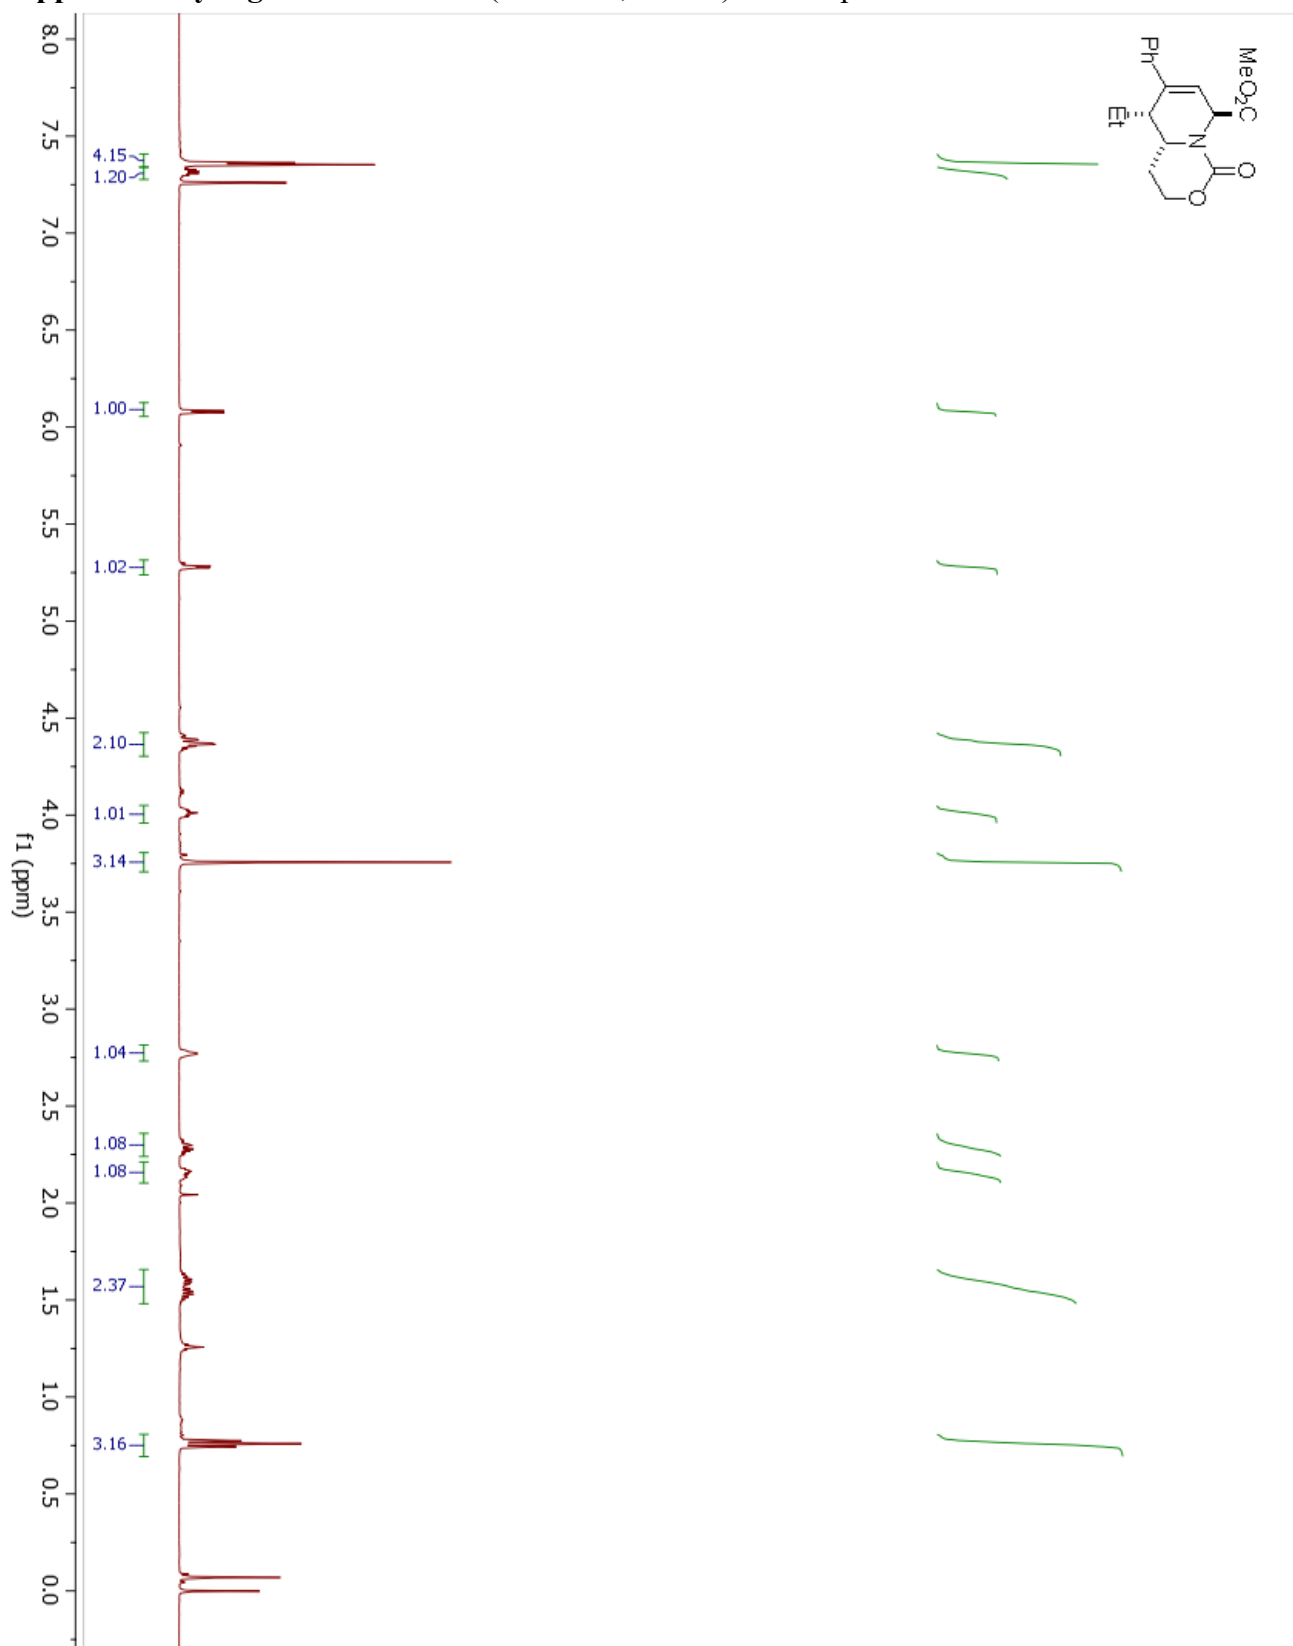

**Supplementary Figure 83.**  $^{13}\text{C}$  NMR (126 MHz,  $\text{CDCl}_3$ ) for compound **7**

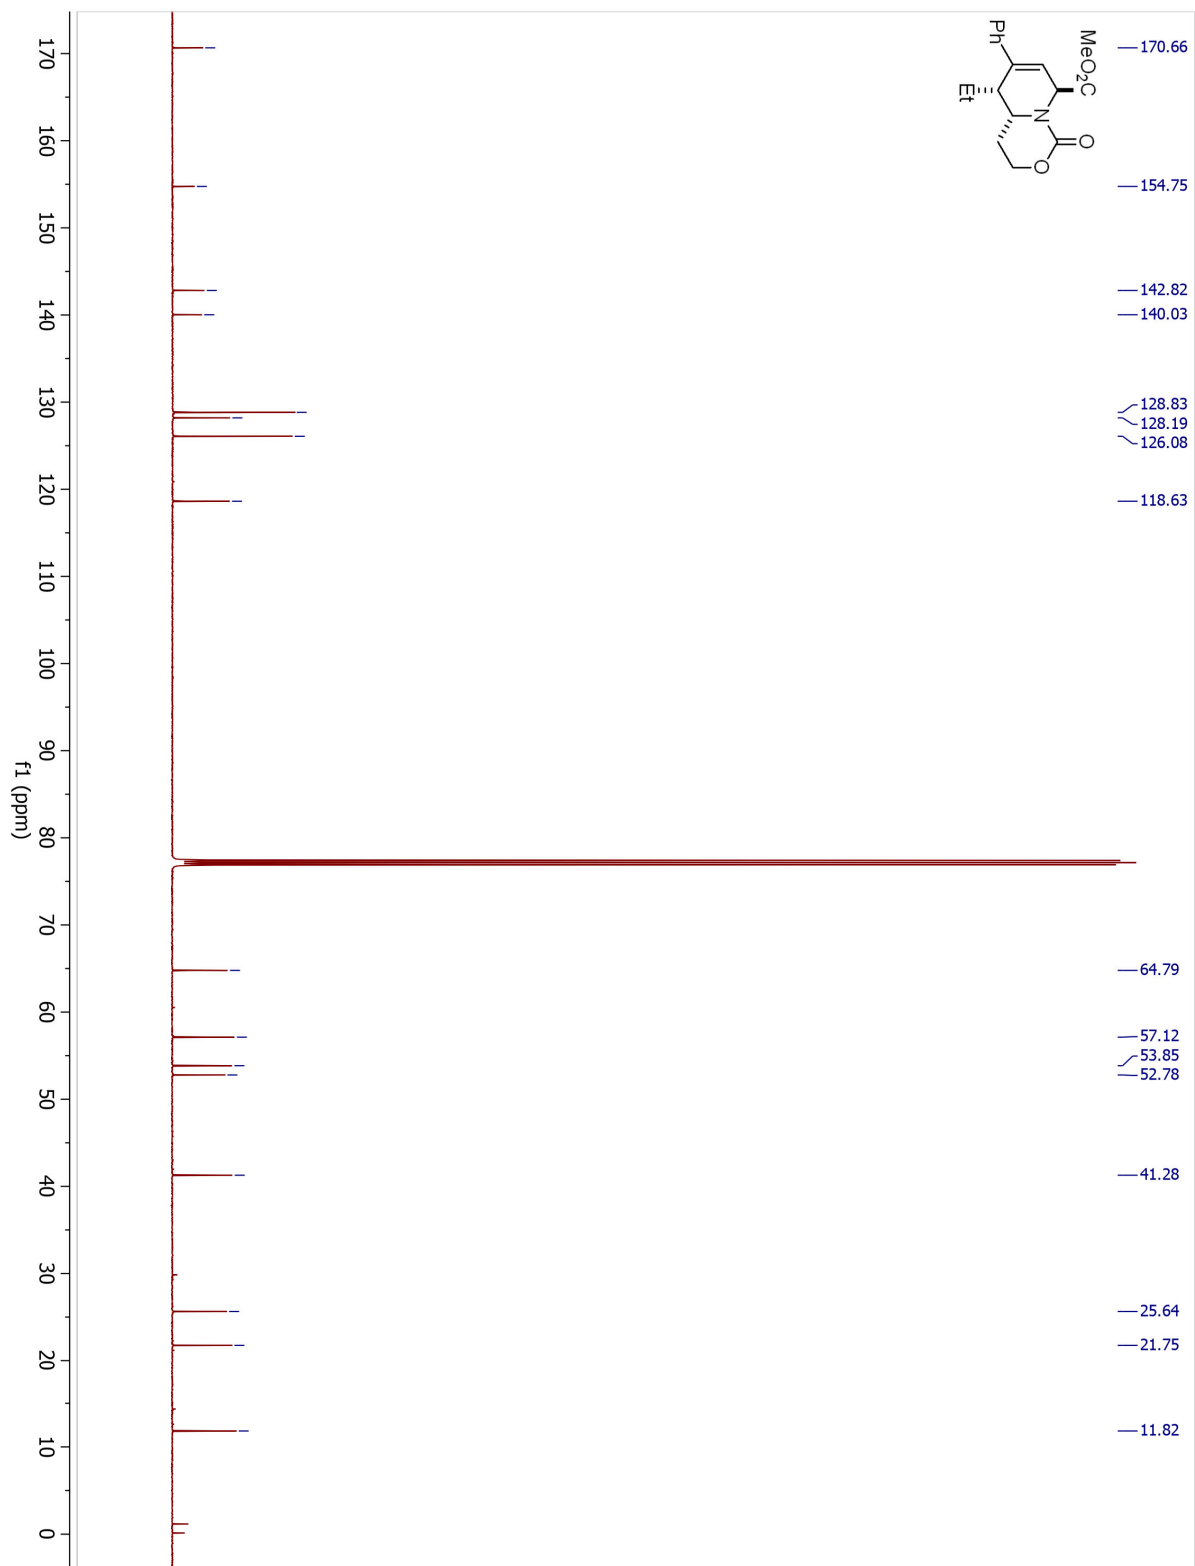

Supplementary Figure 84.  $^1\text{H}$  NMR (500 MHz,  $\text{CDCl}_3$ ) for compound 8

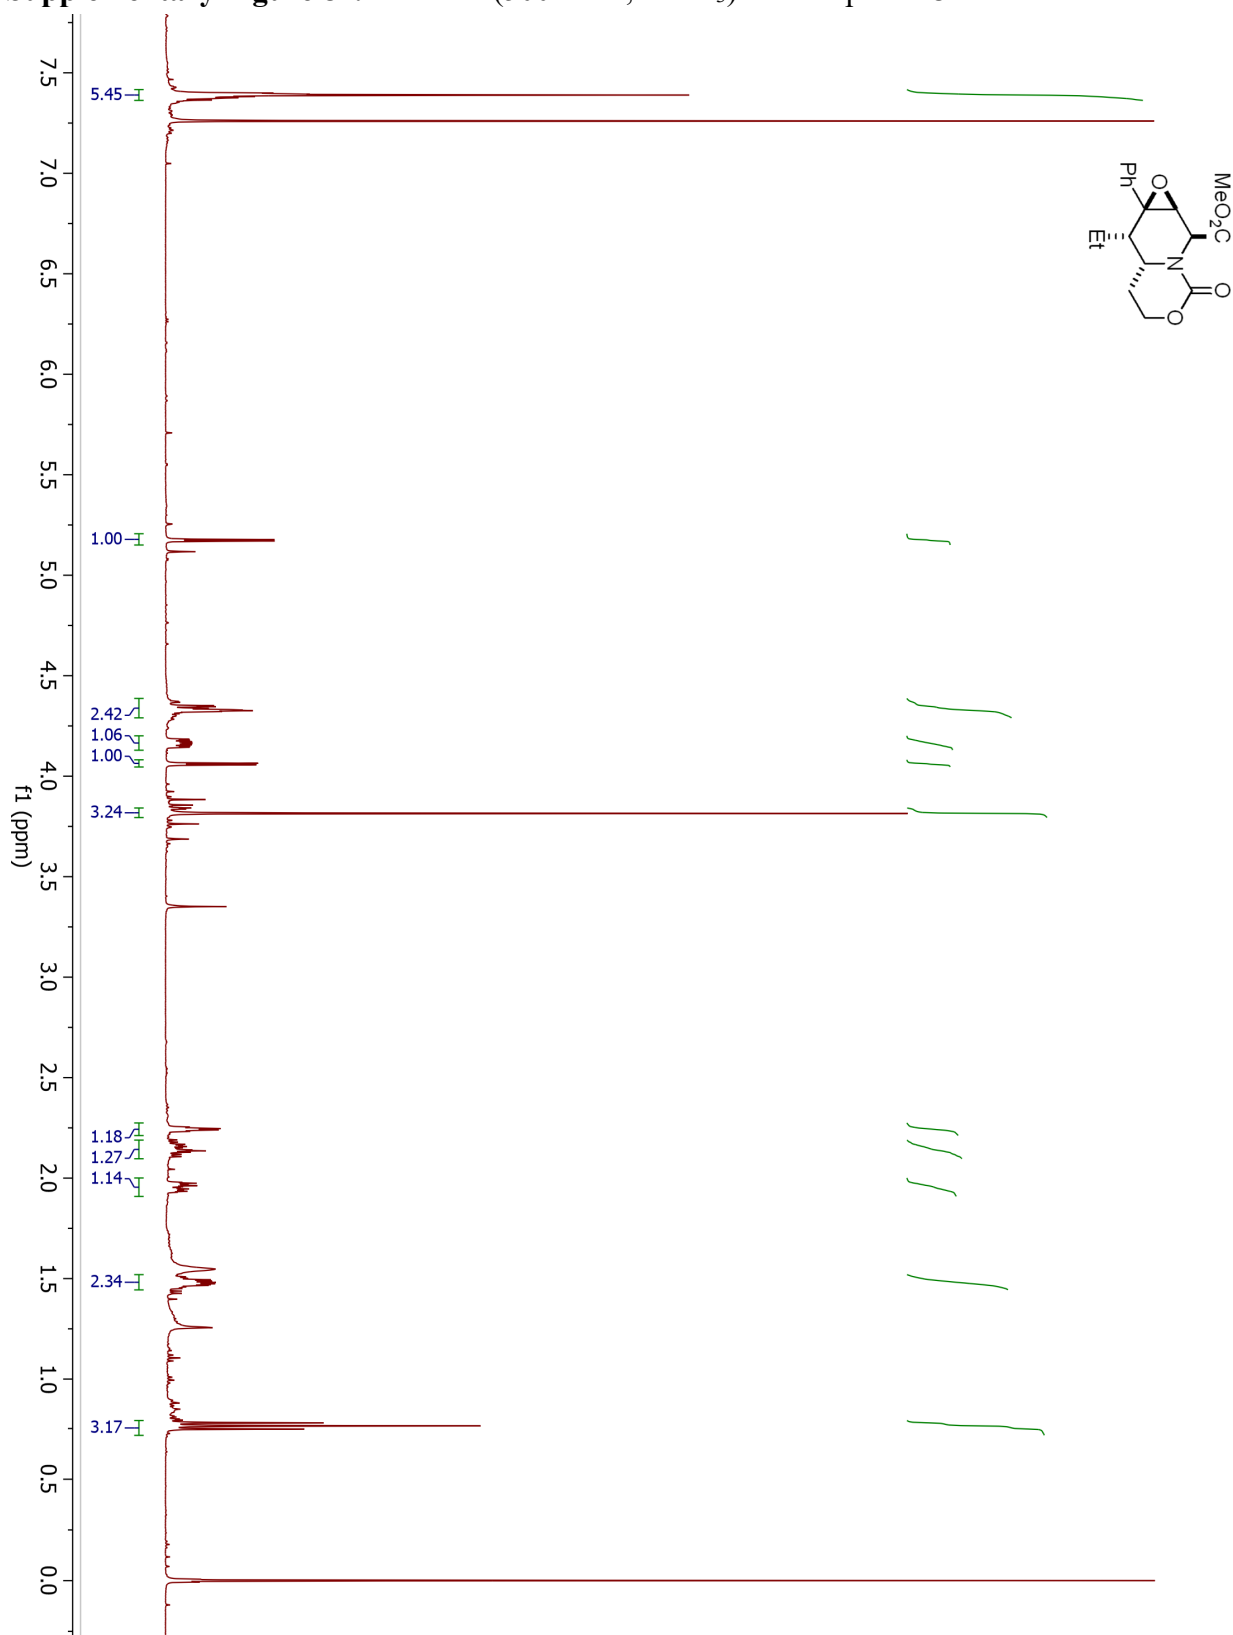

Supplementary Figure 85.  $^{13}\text{C}$  NMR (126 MHz,  $\text{CDCl}_3$ ) for compound 8

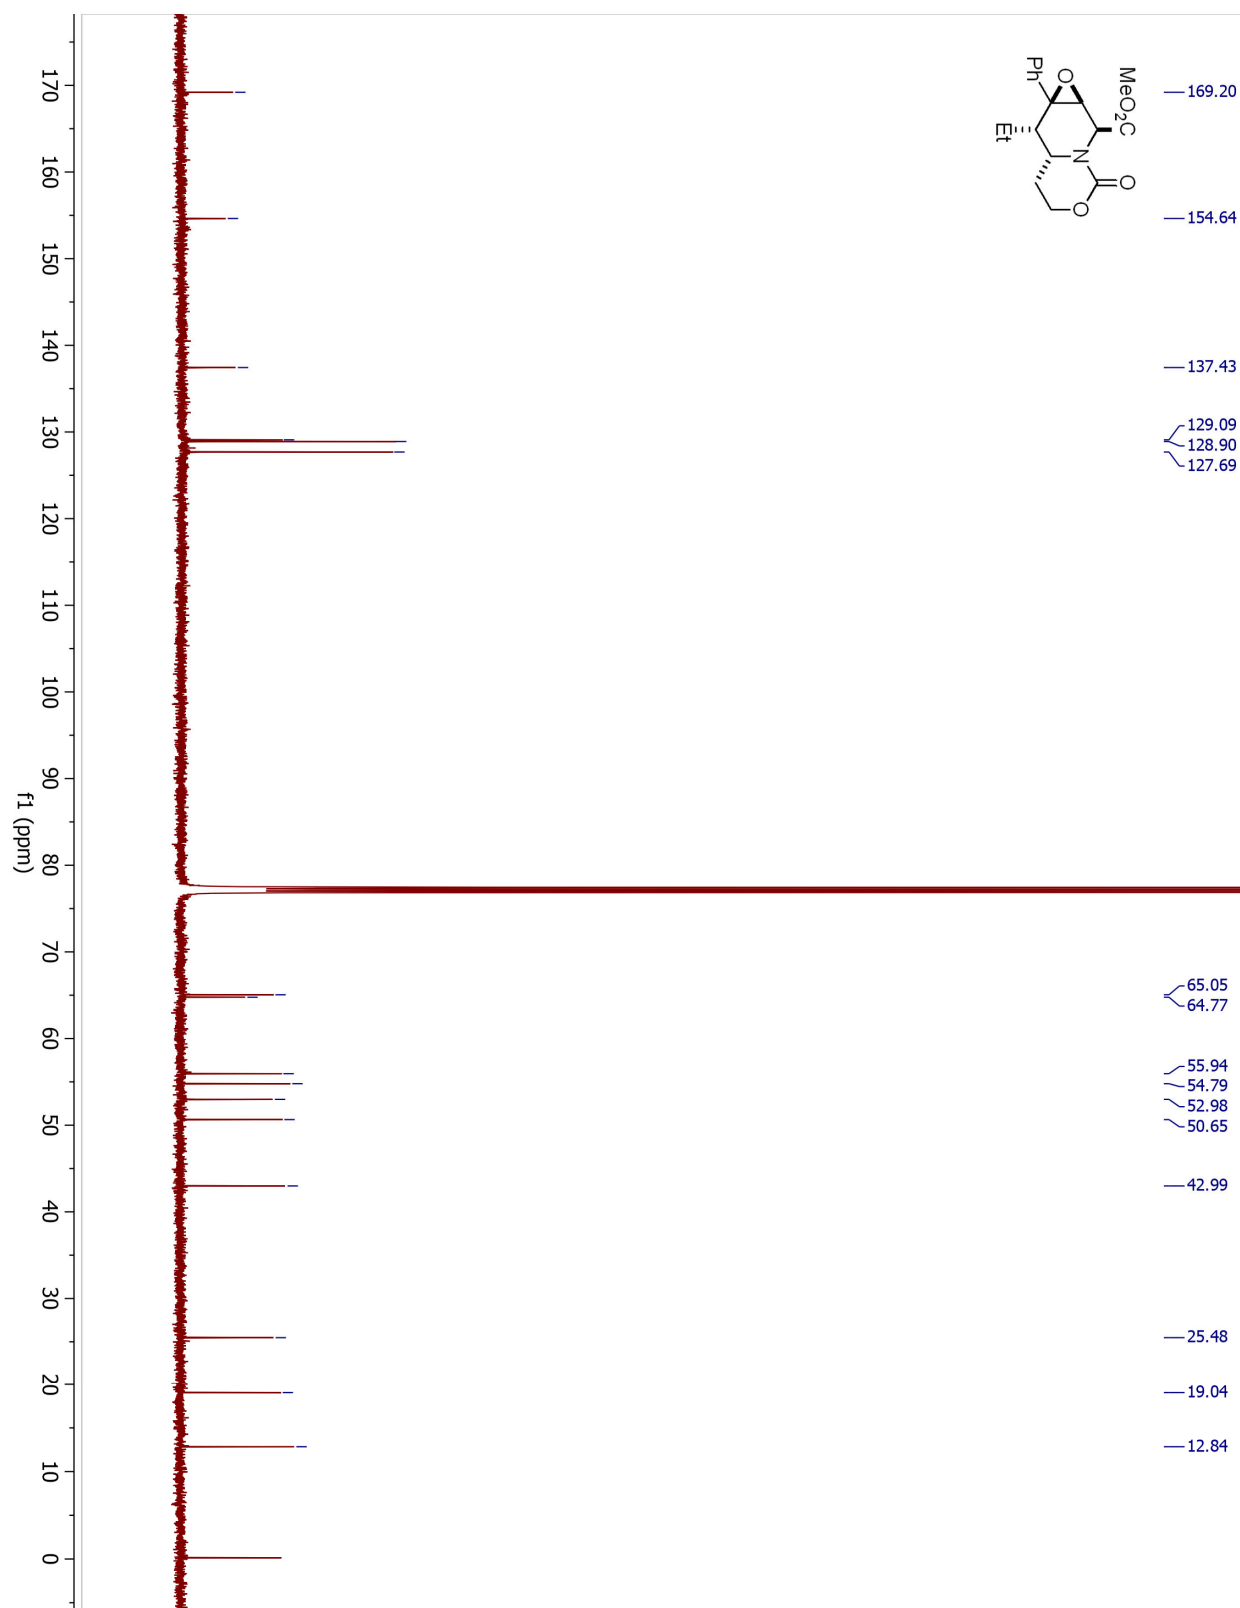

Supplementary Figure 86.  $^1\text{H}$  NMR (500 MHz,  $\text{CDCl}_3$ ) for compound **10**

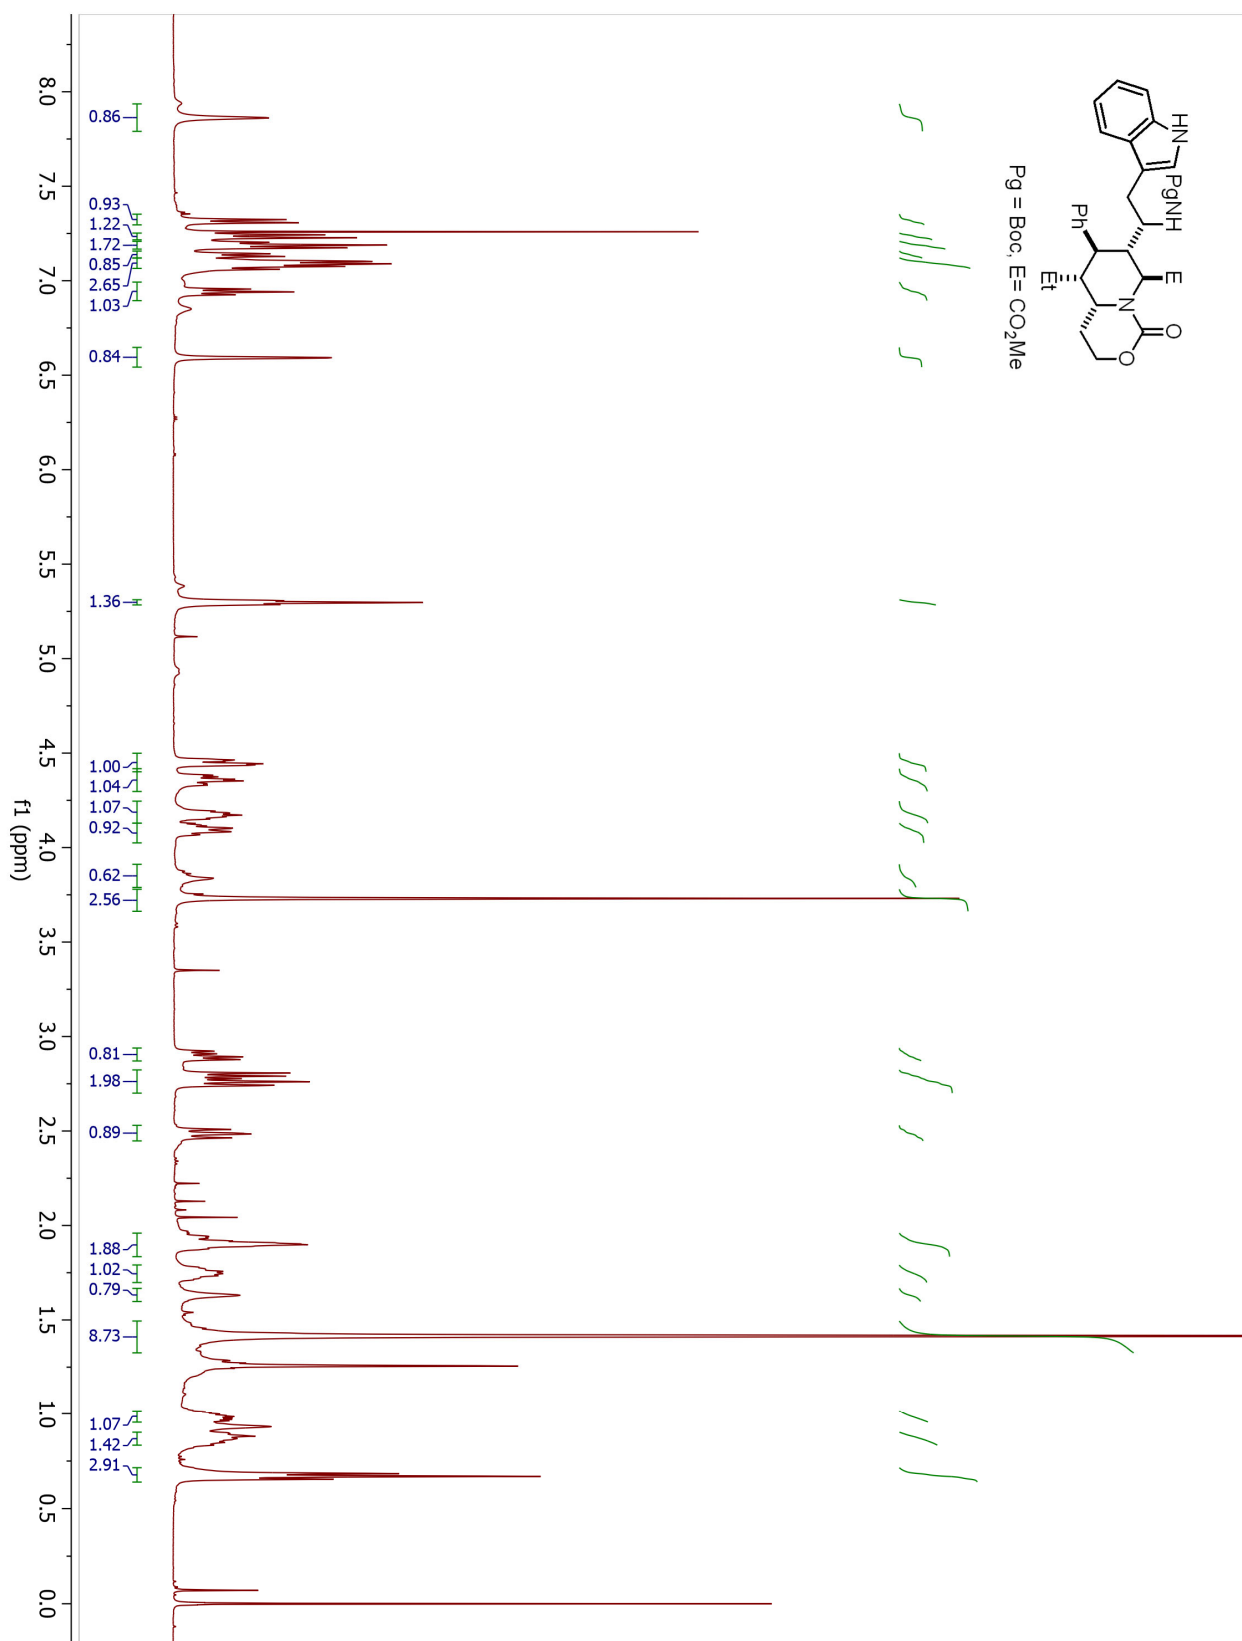

**Supplementary Figure 87.**  $^{13}\text{C}$  NMR (126 MHz,  $\text{CDCl}_3$ ) for compound **10**

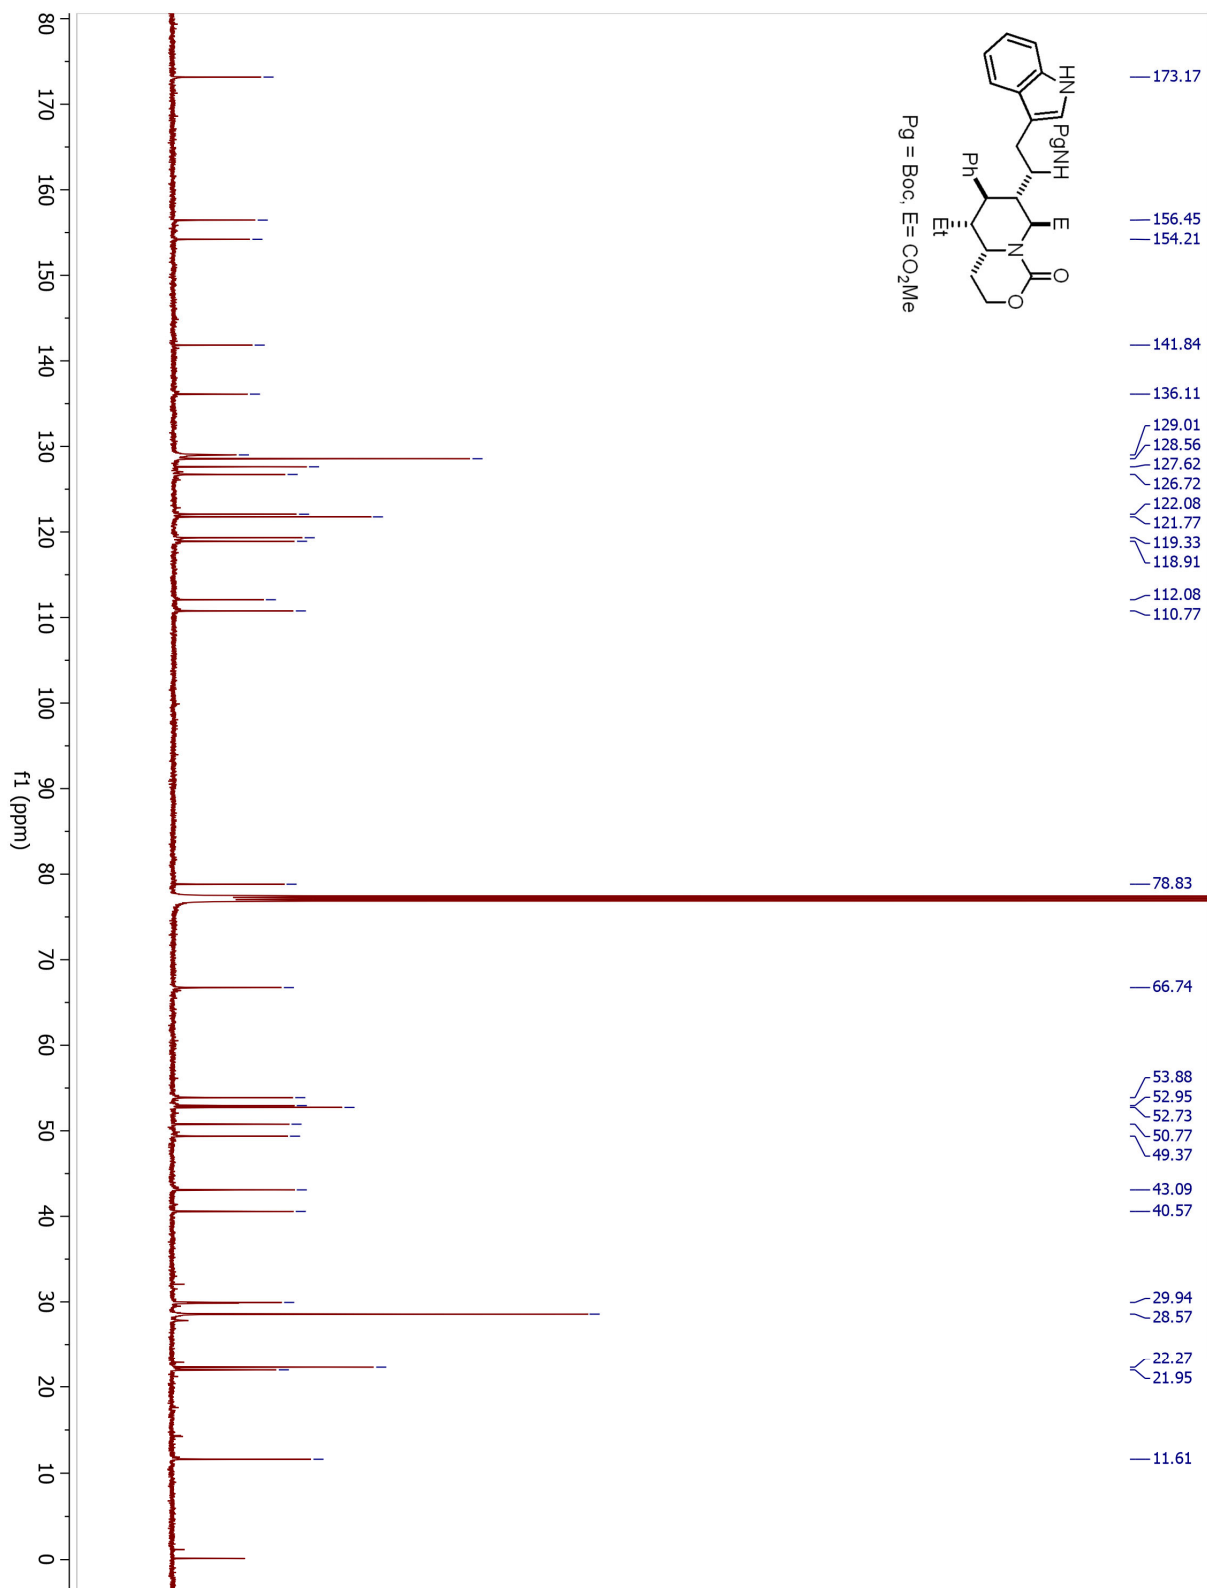

Supplementary Figure 88.  $^1\text{H}$  NMR (500 MHz,  $\text{CDCl}_3$ ) for compound **11a**

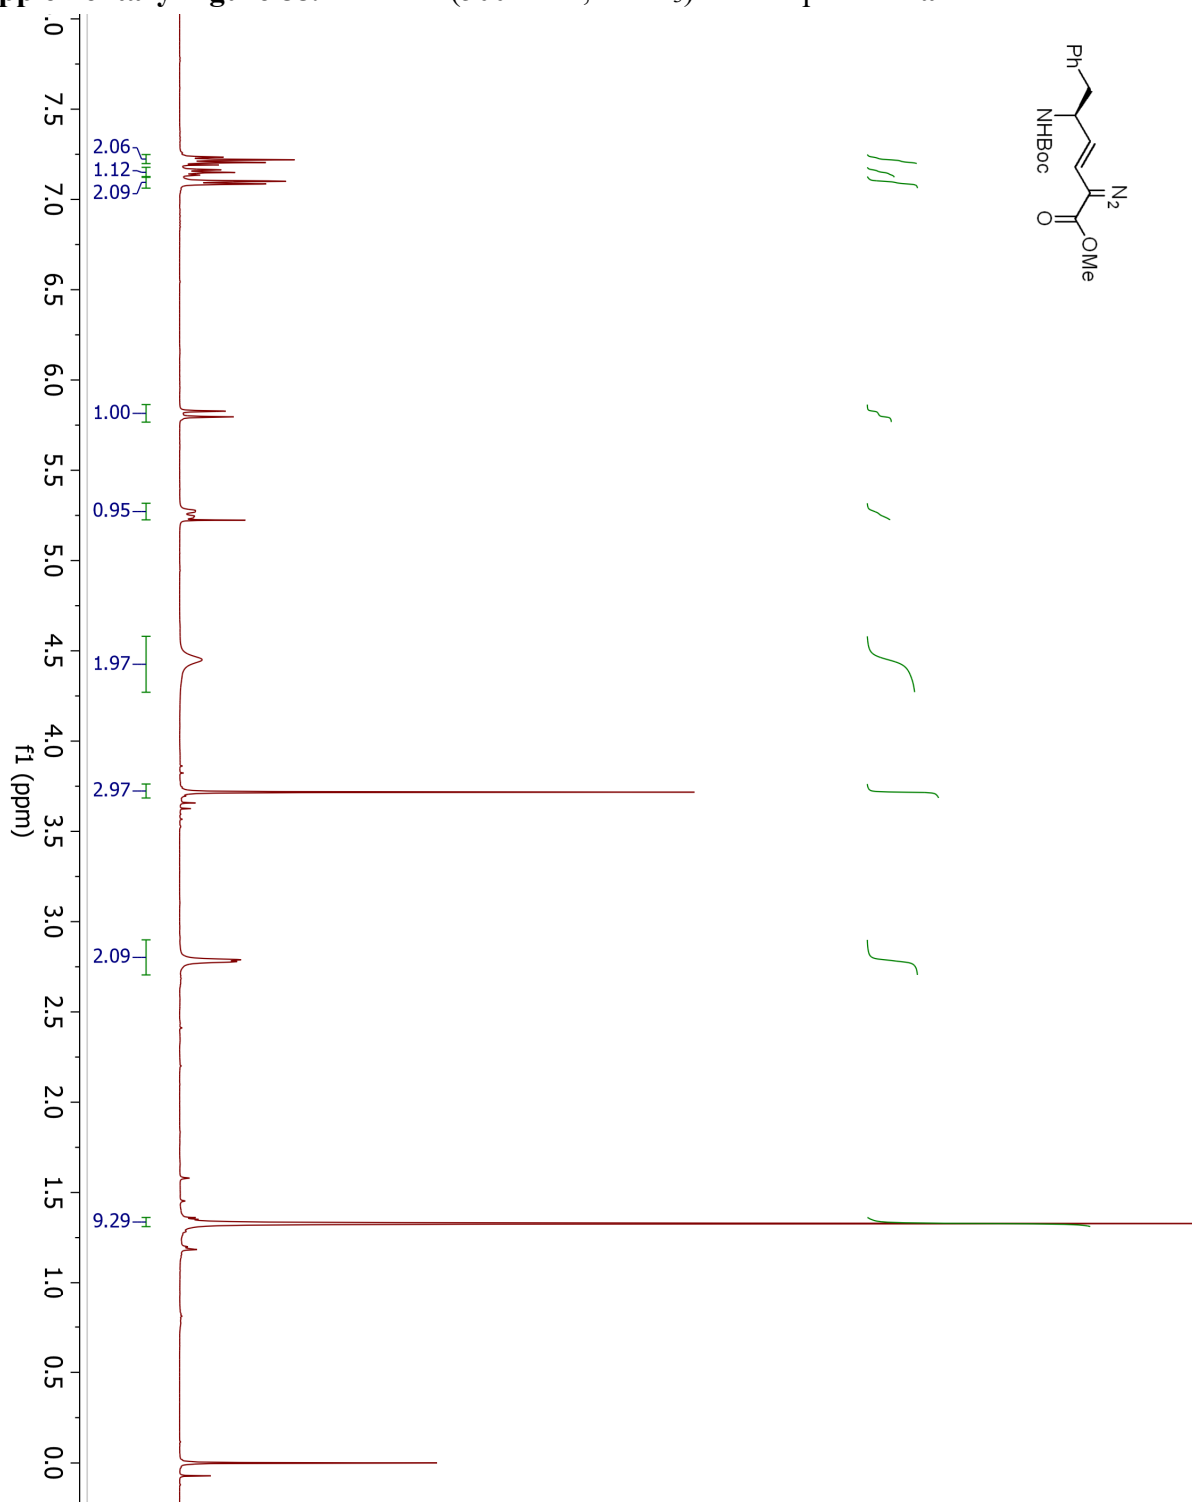

Supplementary Figure 89.  $^{13}\text{C}$  NMR (126 MHz,  $\text{CDCl}_3$ ) for compound **11a**

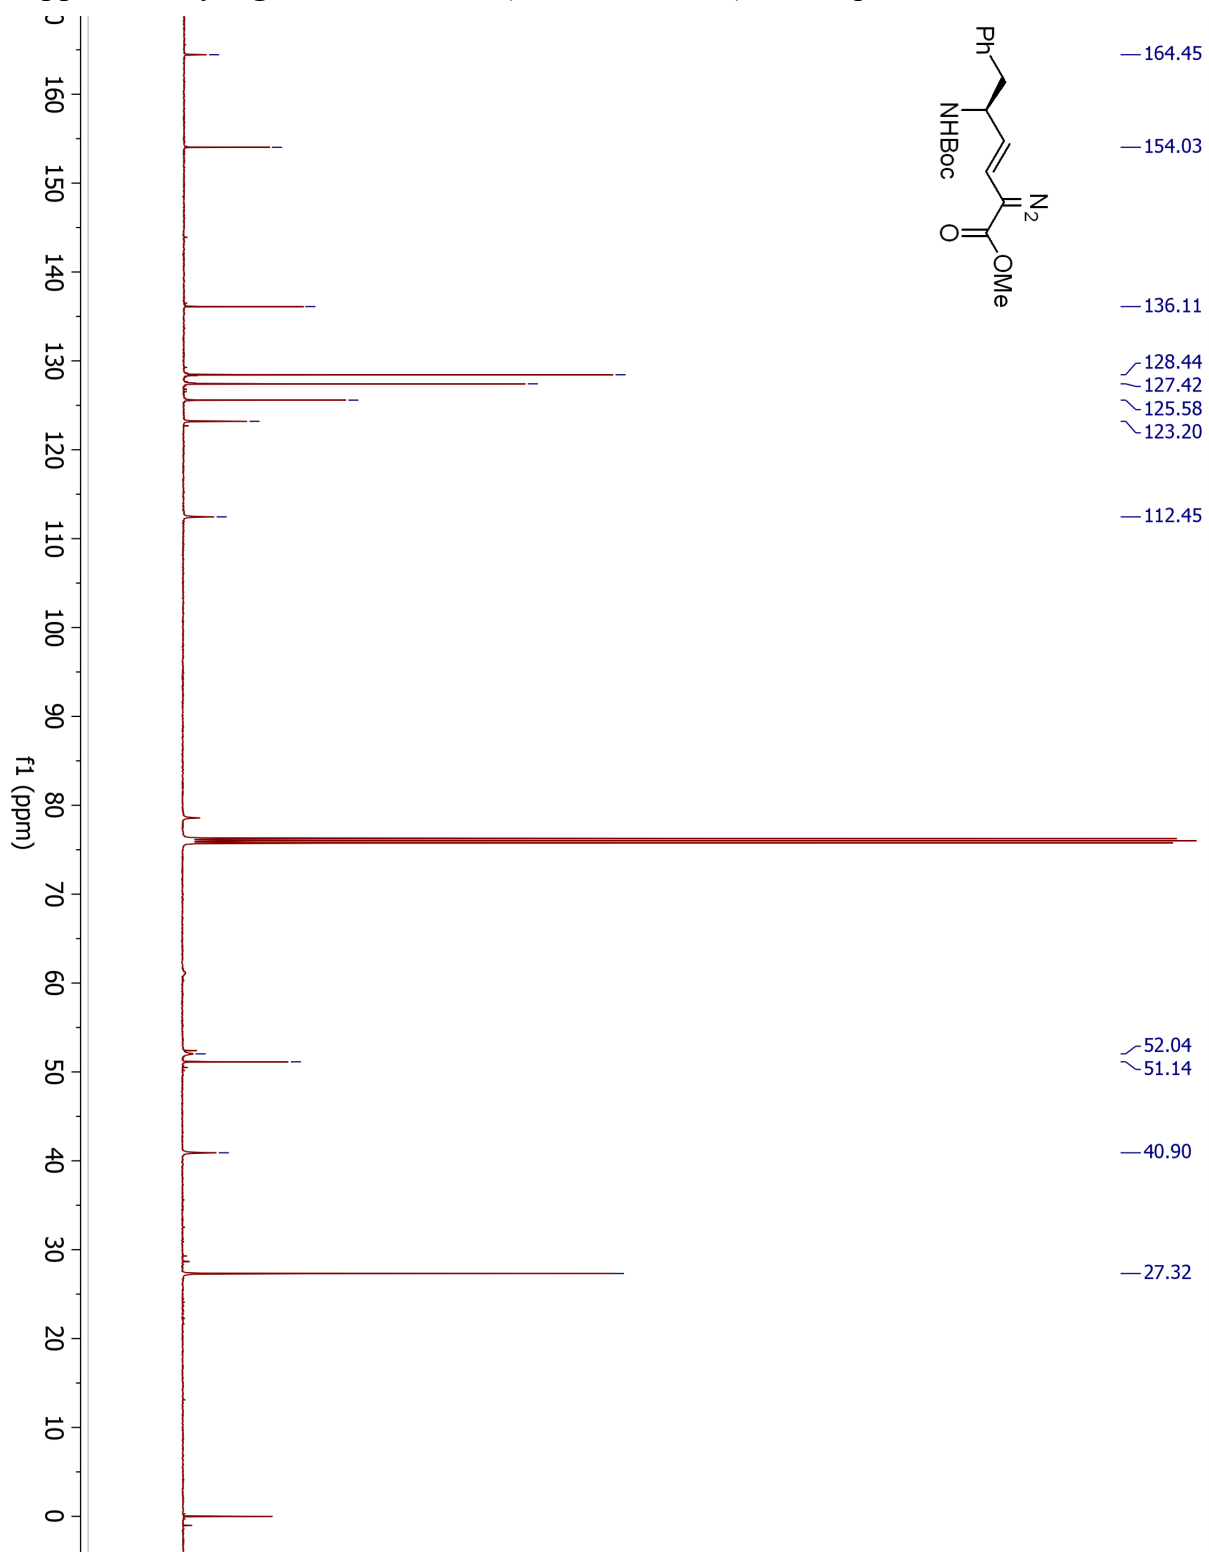

Supplementary Figure 90.  $^1\text{H}$  NMR (500 MHz,  $\text{CDCl}_3$ ) for compound **12a**

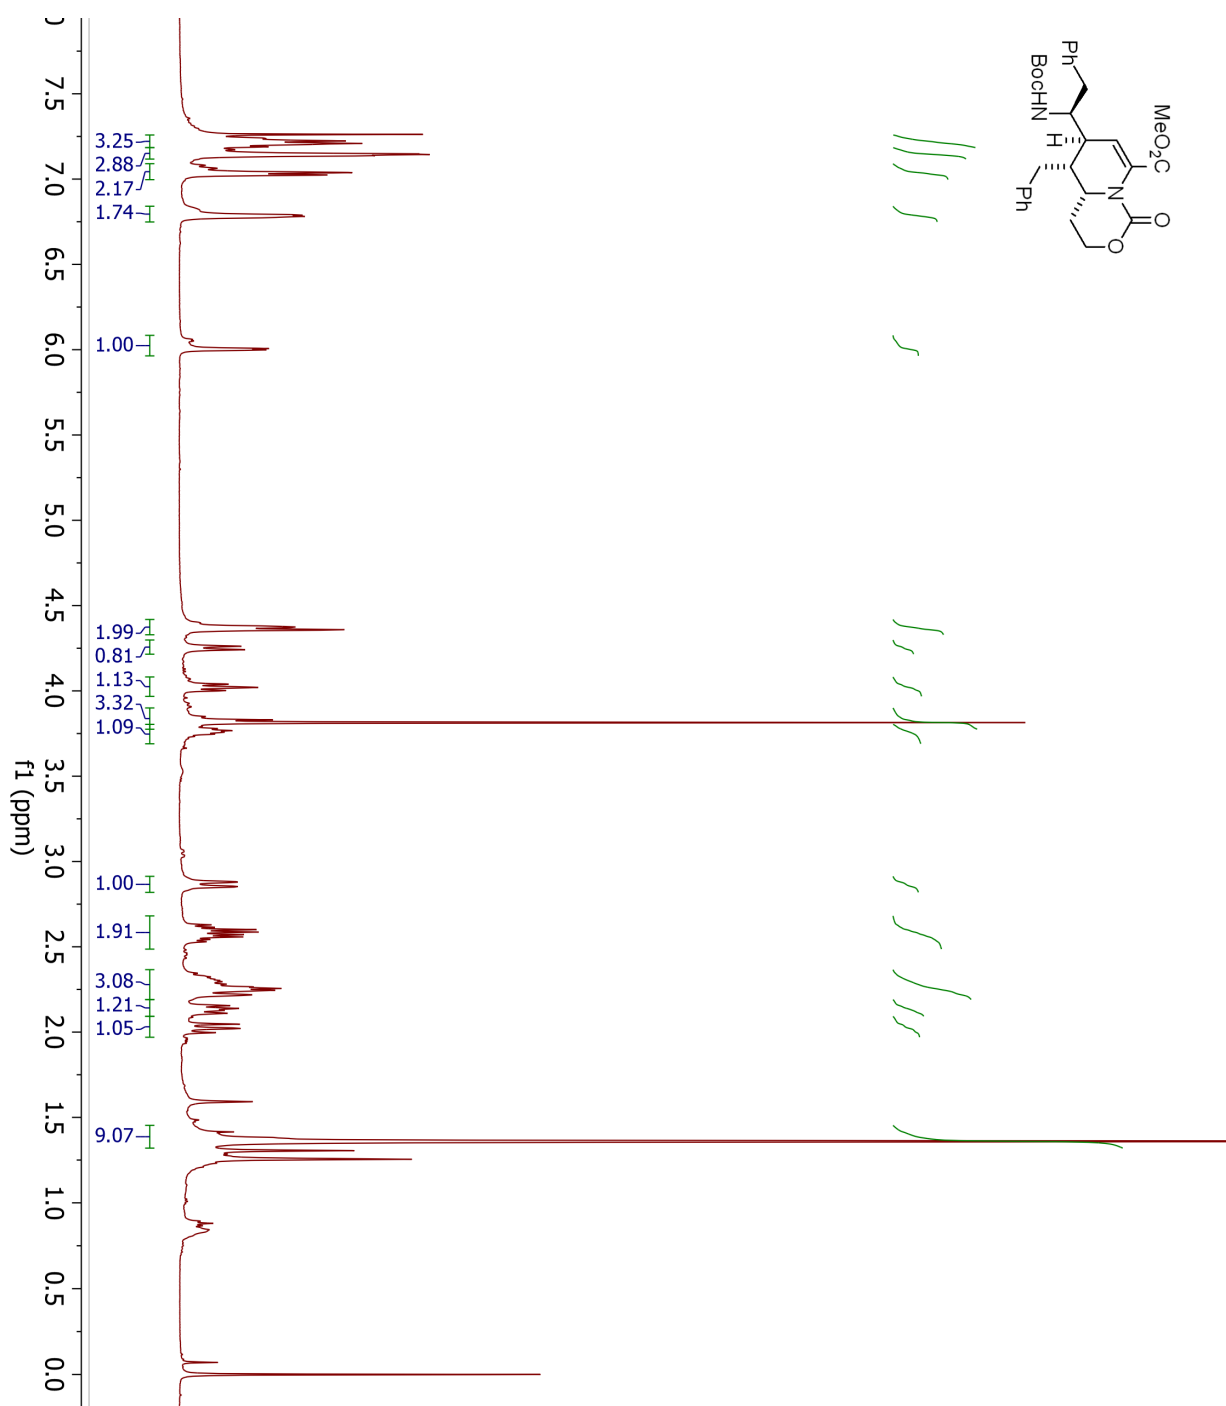

Supplementary Figure 91.  $^{13}\text{C}$  NMR (126 MHz,  $\text{CDCl}_3$ ) for compound **12a**

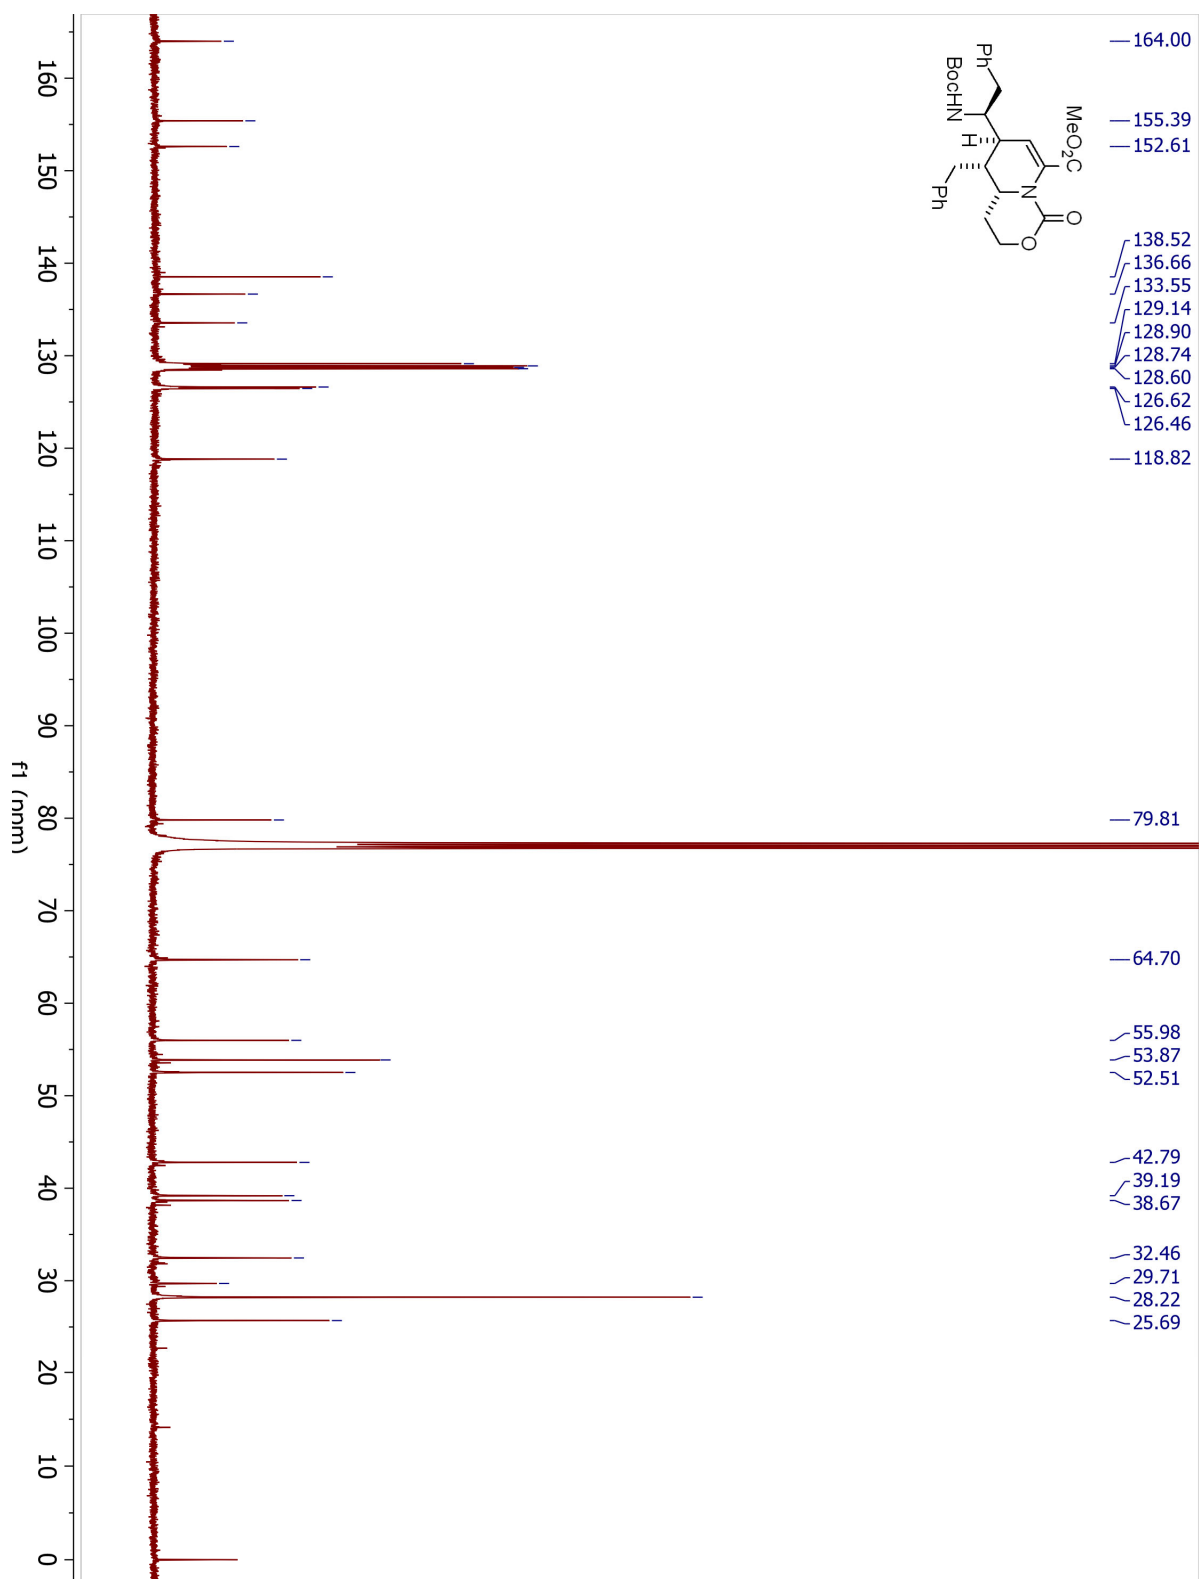

**Supplementary Figure 92.**  $^1\text{H}$  NMR (500 MHz,  $\text{C}_6\text{D}_6$ ) for compound S1

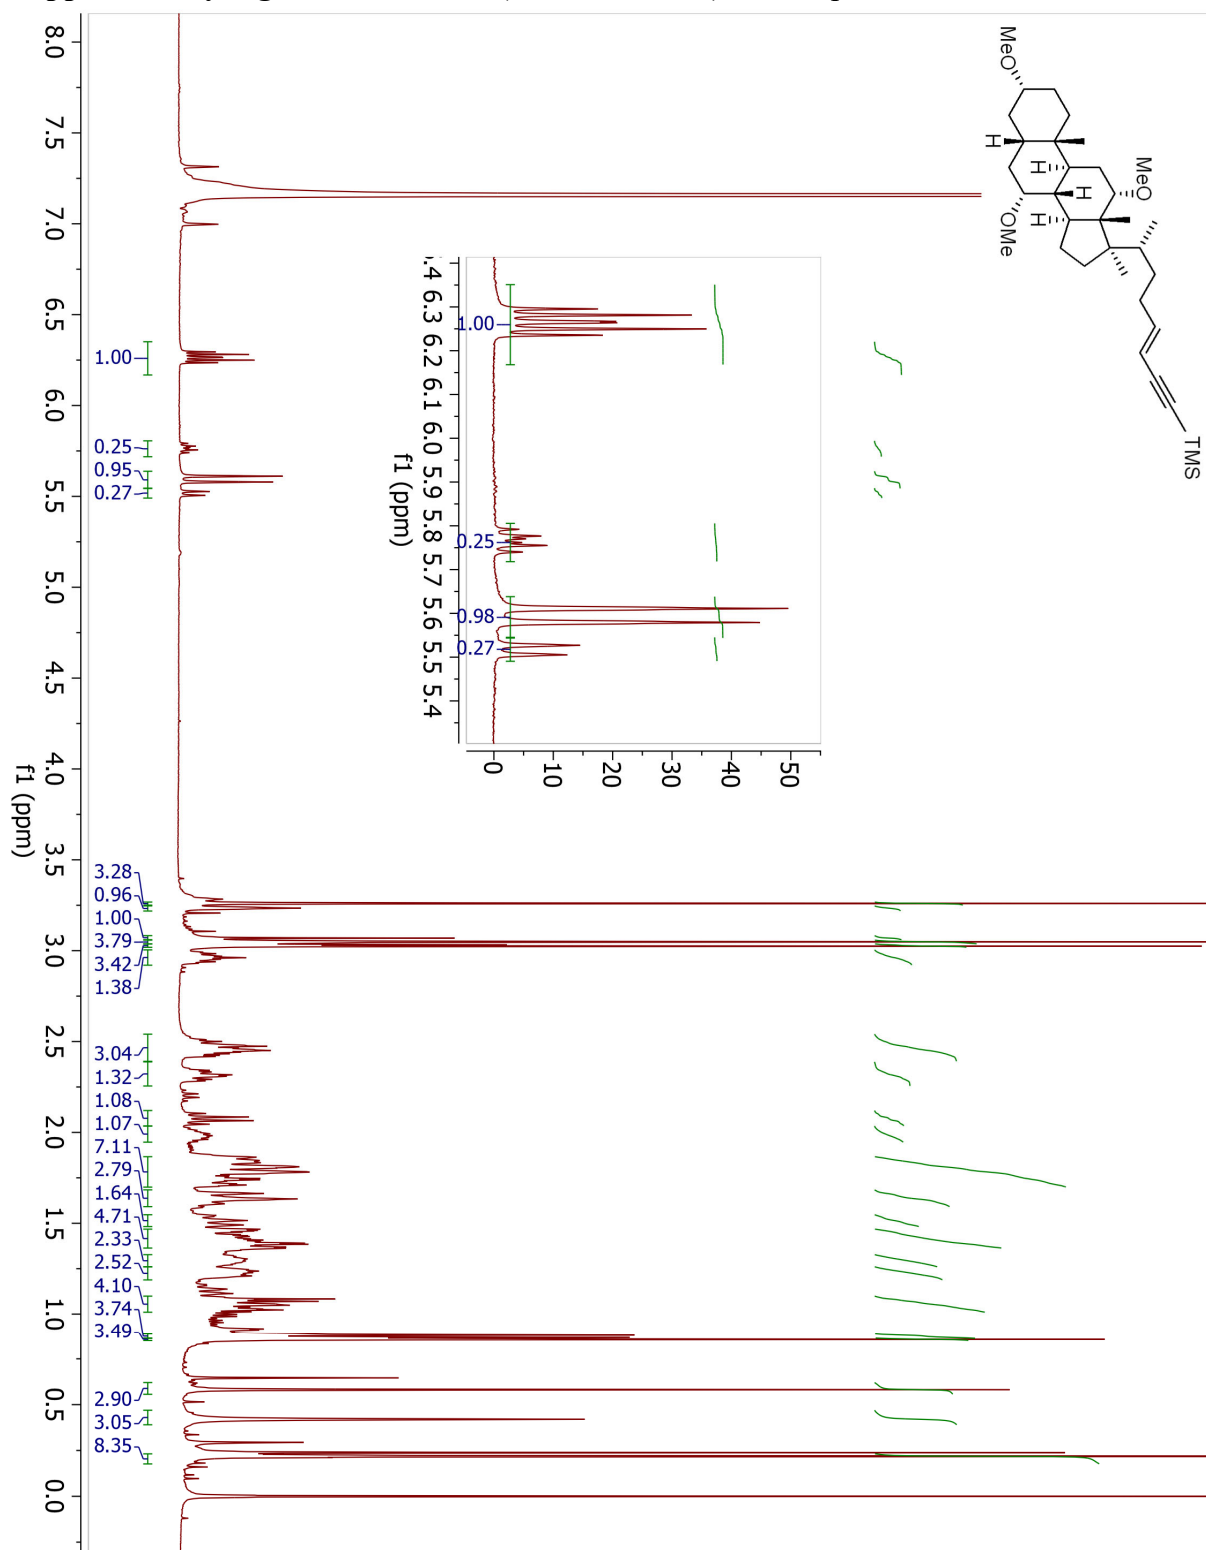

**Supplementary Figure 93.**  $^{13}\text{C}$  NMR (126 MHz,  $\text{C}_6\text{D}_6$ ) for compound **S1**

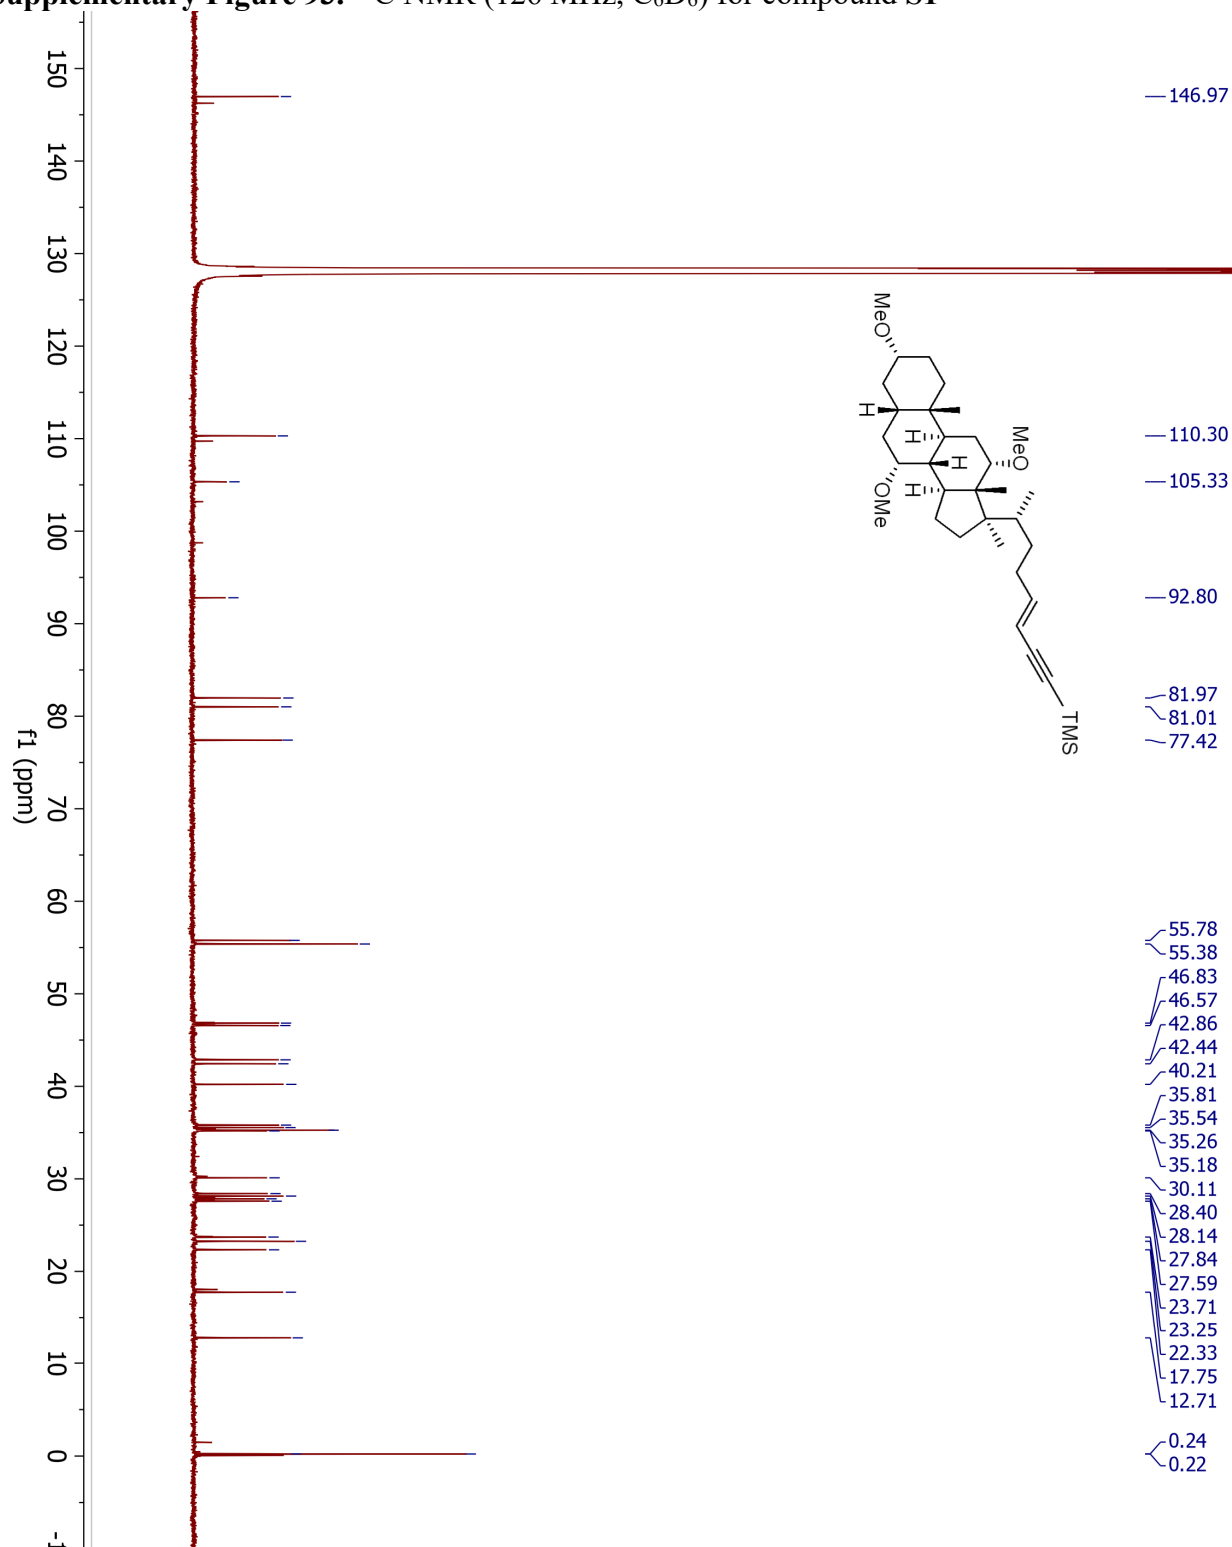

**Supplementary Figure 94.**  $^1\text{H}$  NMR (500 MHz,  $\text{C}_6\text{D}_6$ ) for compound **S2**

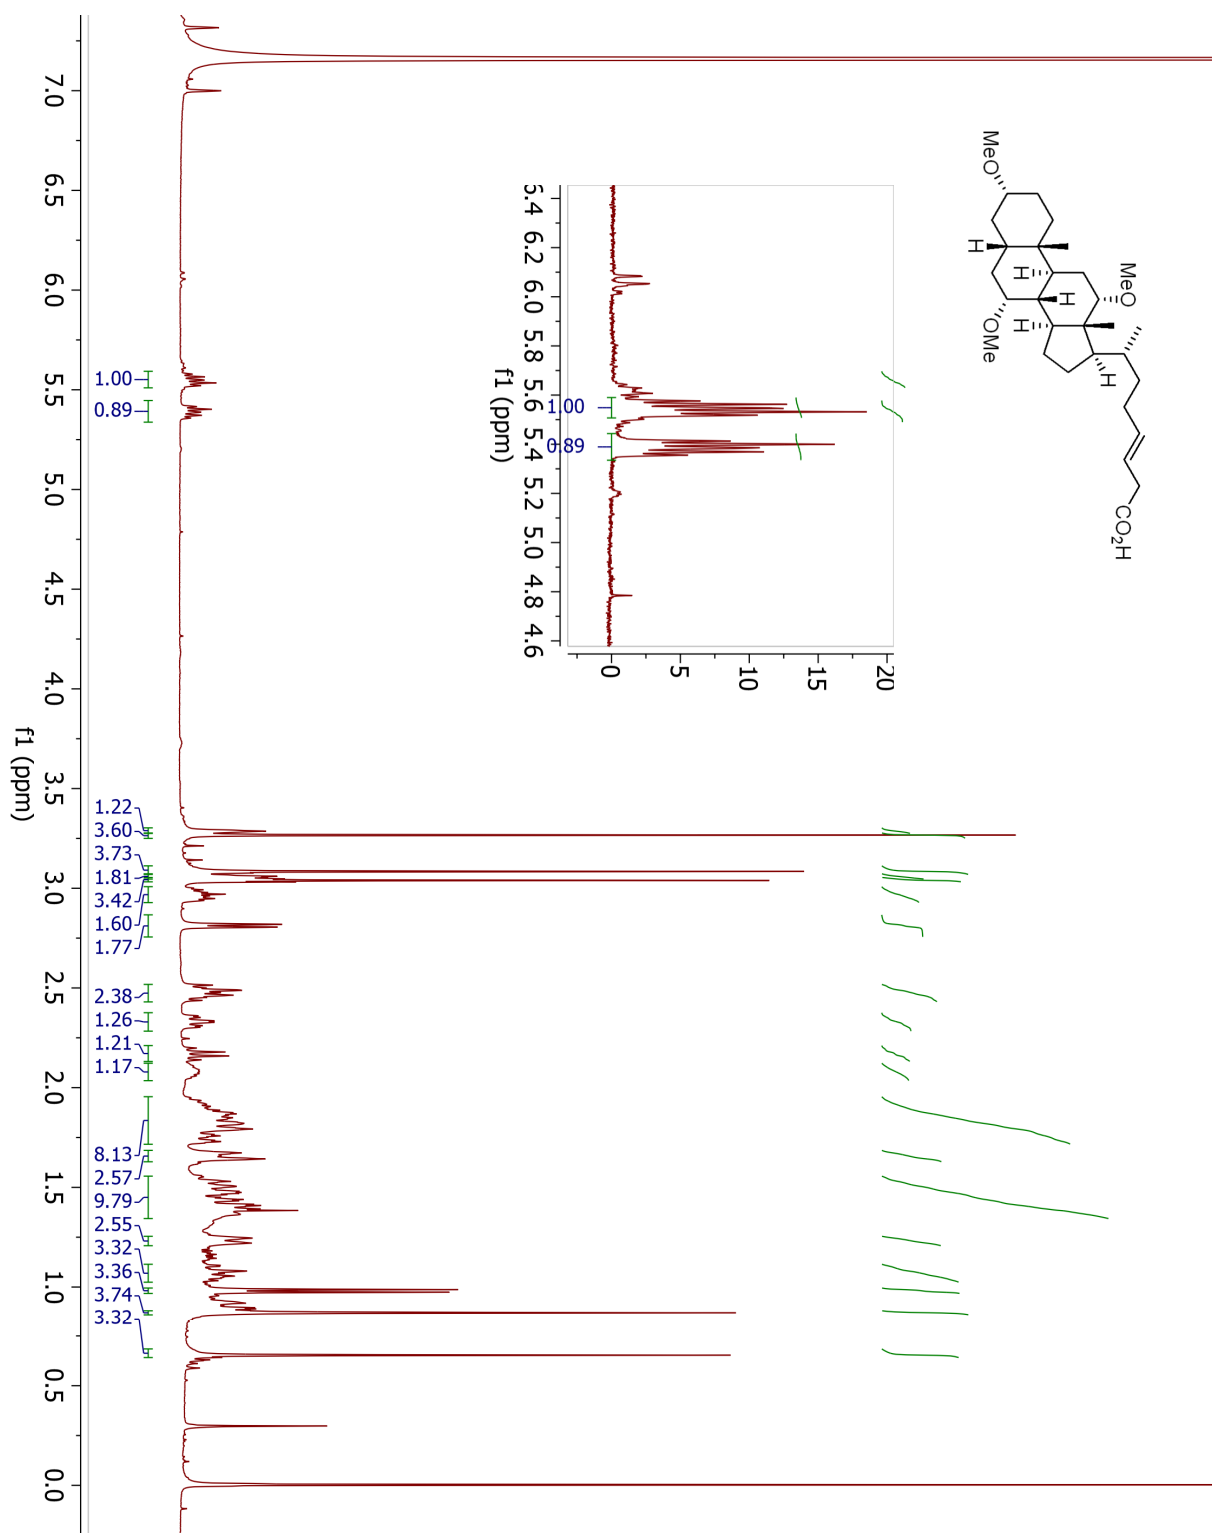

Supplementary Figure 95.  $^{13}\text{C}$  NMR (126 MHz,  $\text{C}_6\text{D}_6$ ) for compound S2

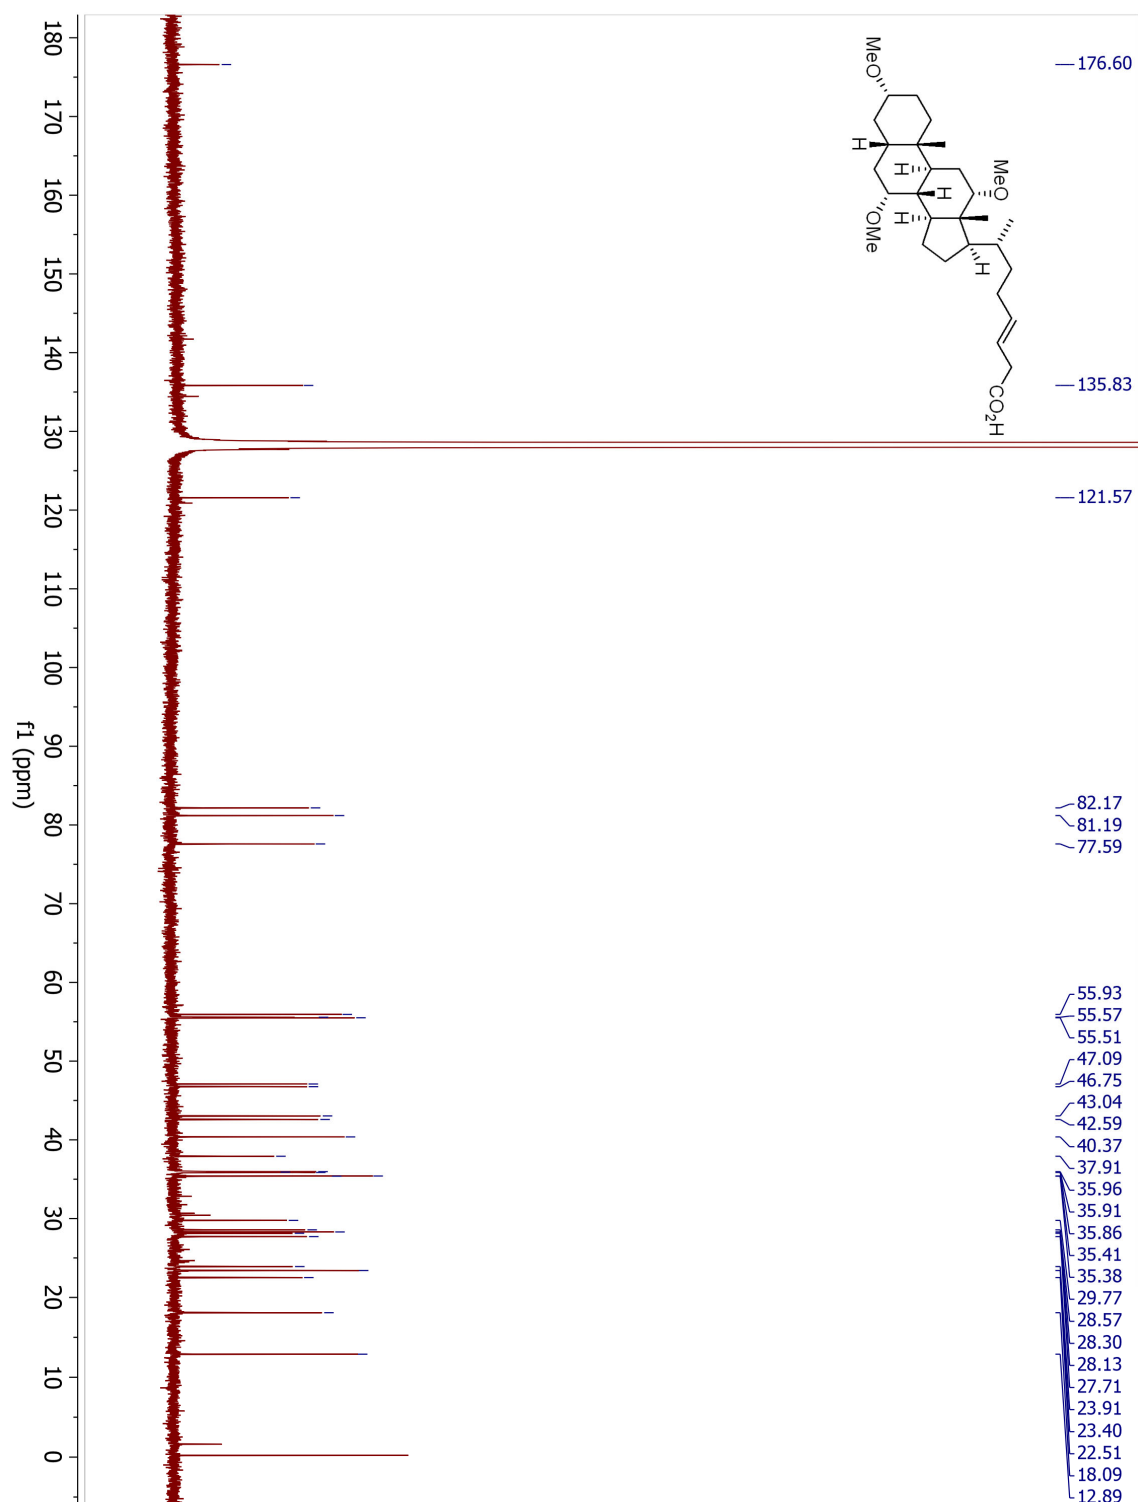

Supplementary Figure 96.  $^1\text{H}$  NMR (500 MHz,  $\text{C}_6\text{D}_6$ ) for compound S3

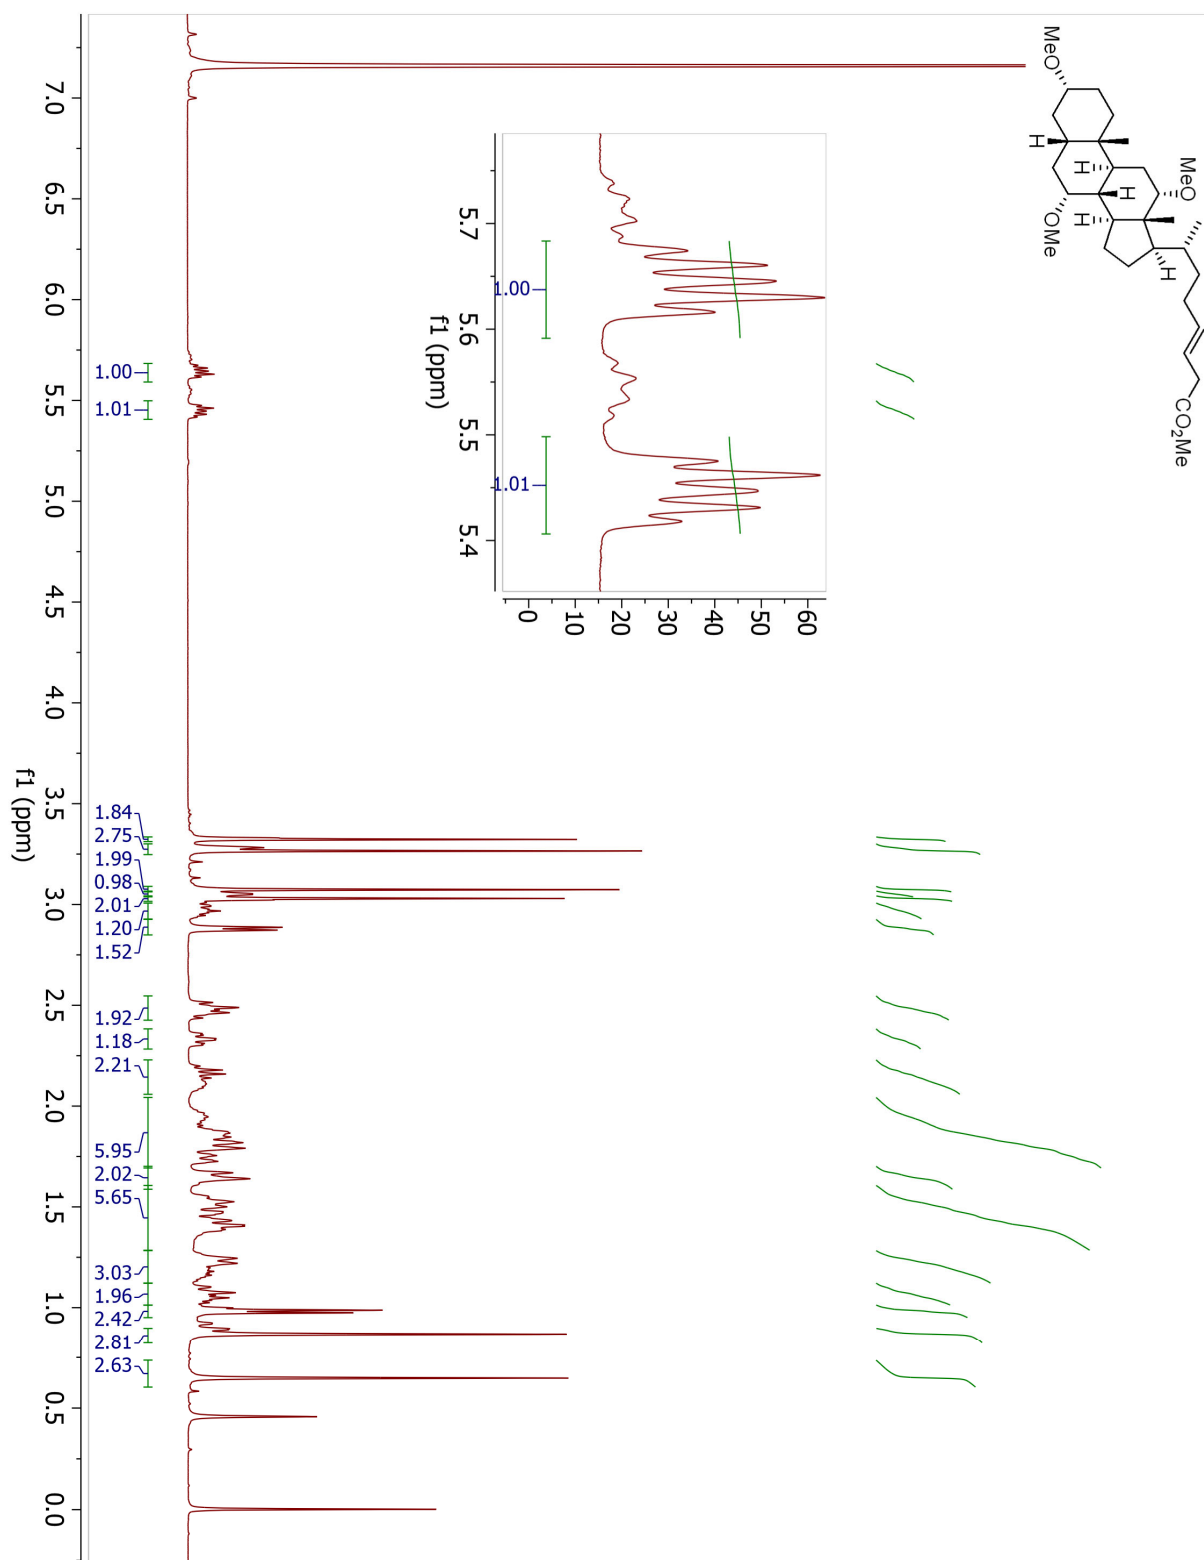

**Supplementary Figure 97.**  $^{13}\text{C}$  NMR (126 MHz,  $\text{C}_6\text{D}_6$ ) for compound **S3**

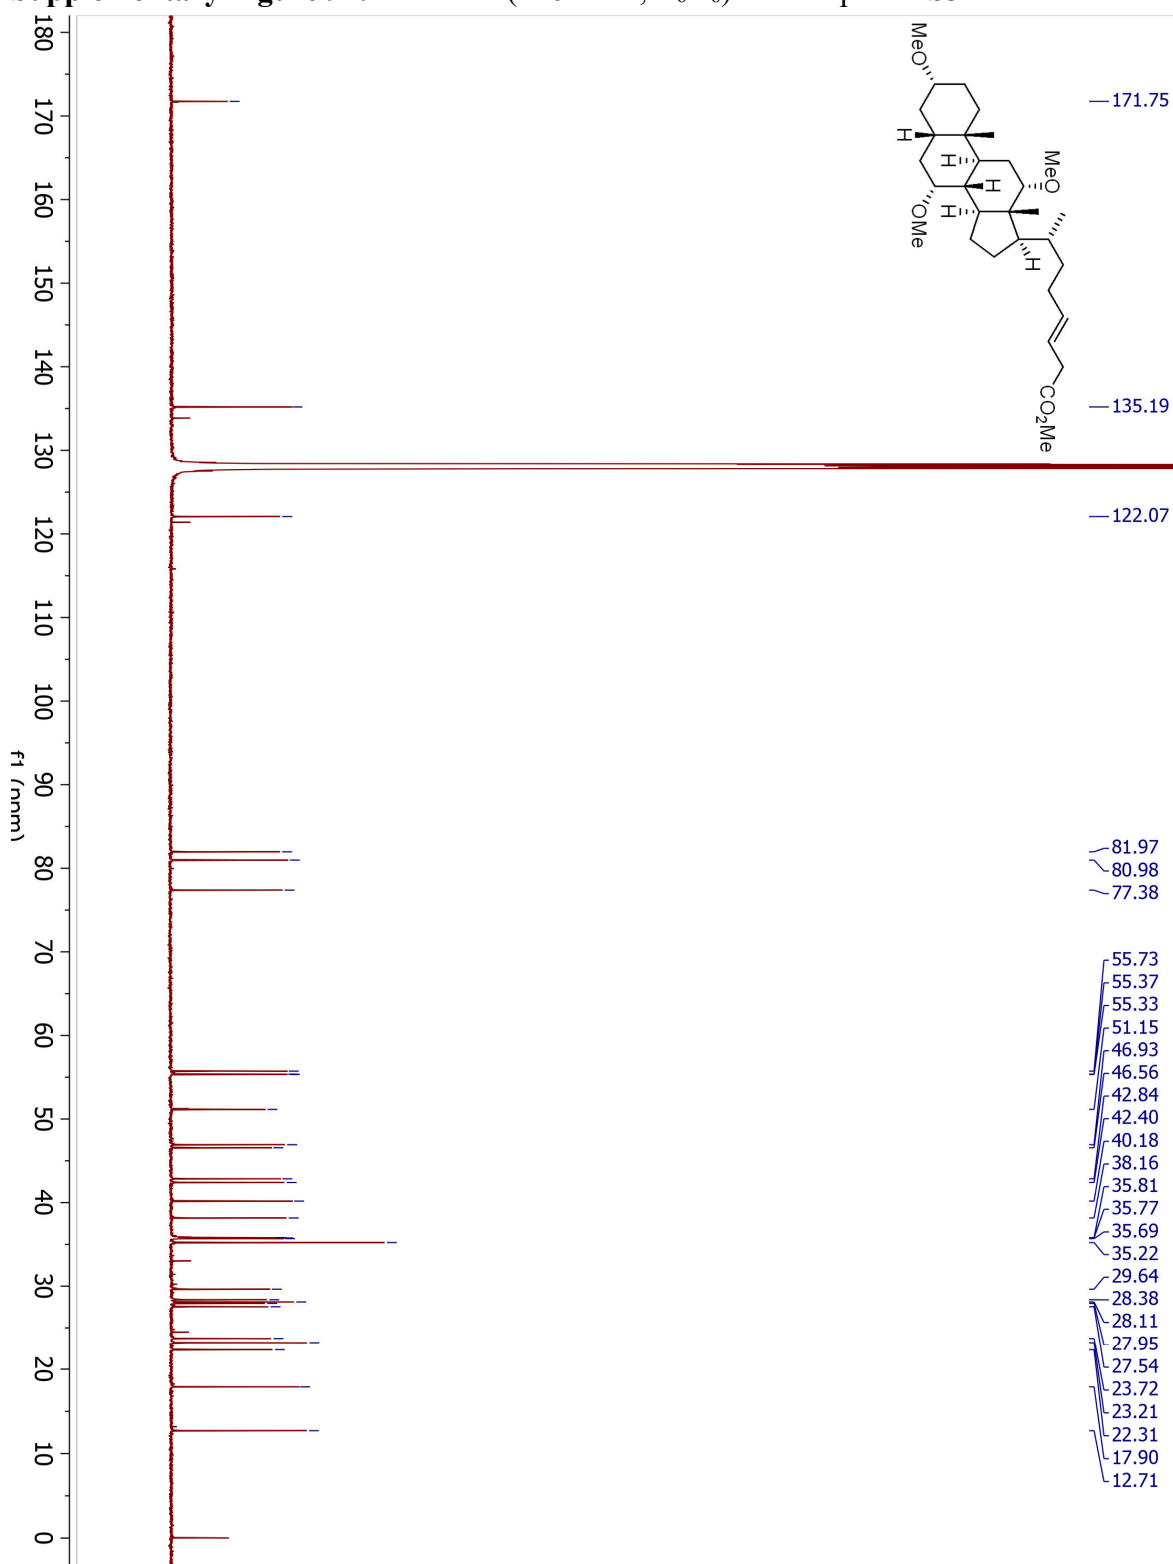

**Supplementary Figure 98.**  $^1\text{H}$  NMR (500 MHz,  $\text{C}_6\text{D}_6$ ) for compound **11b**

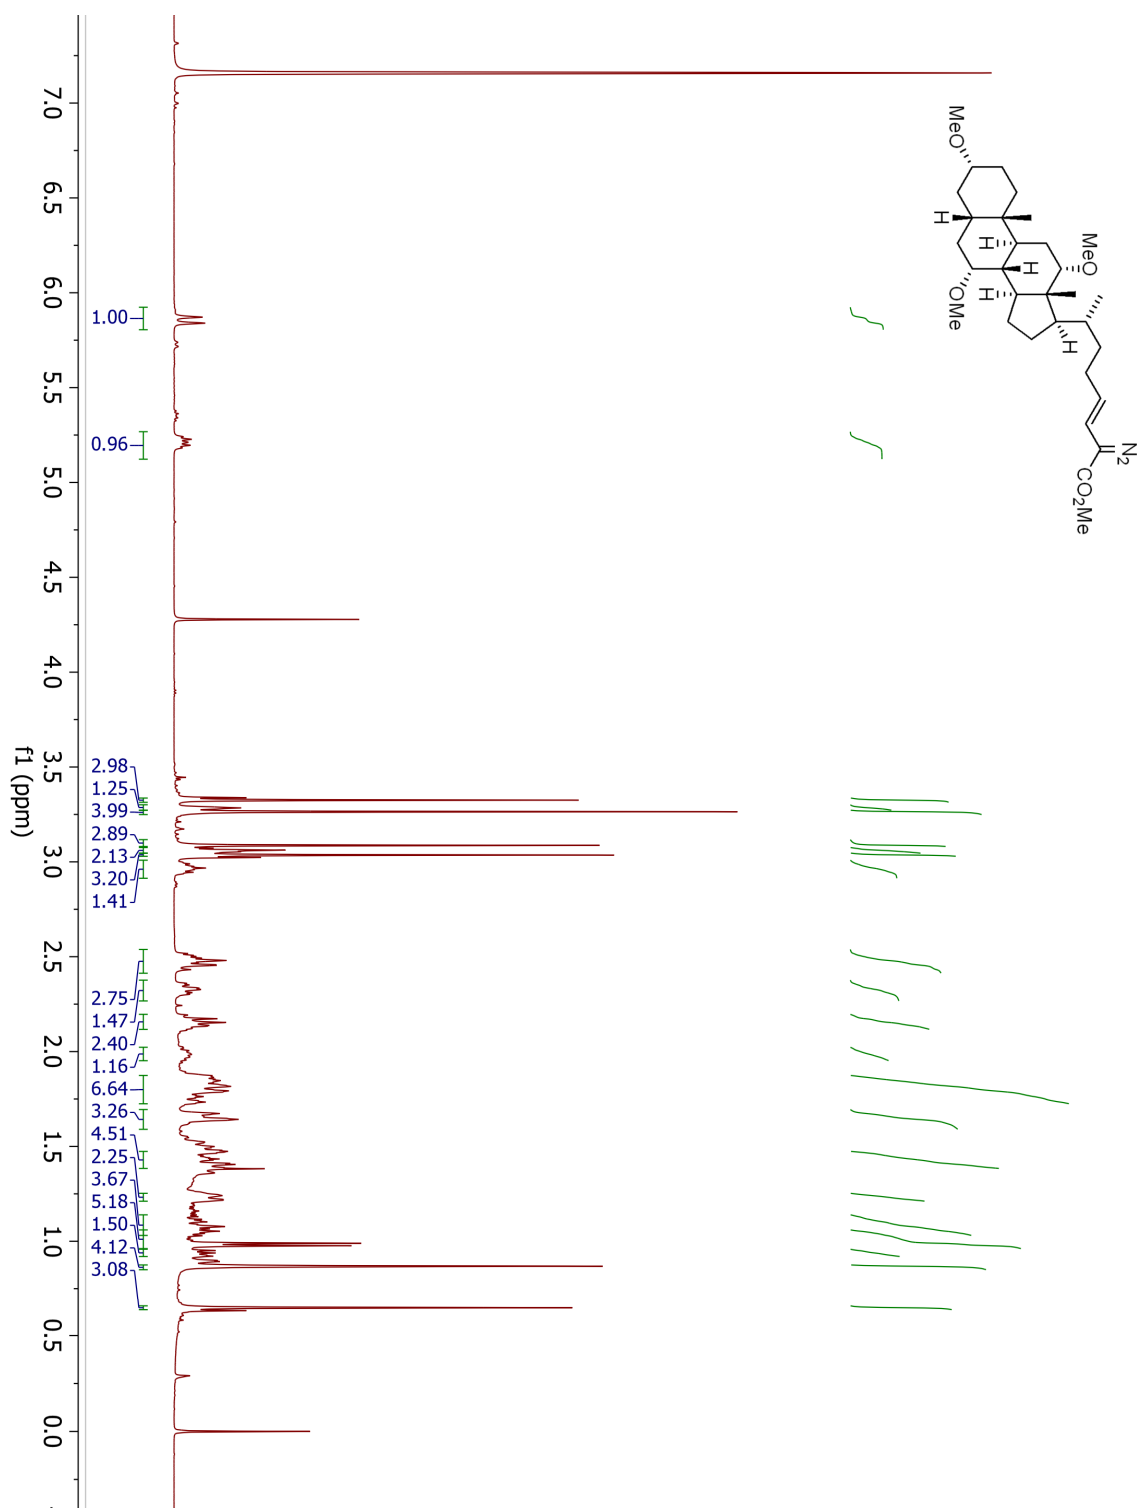

**Supplementary Figure 99.**  $^{13}\text{C}$  NMR (126 MHz,  $\text{C}_6\text{D}_6$ ) for compound **11b**

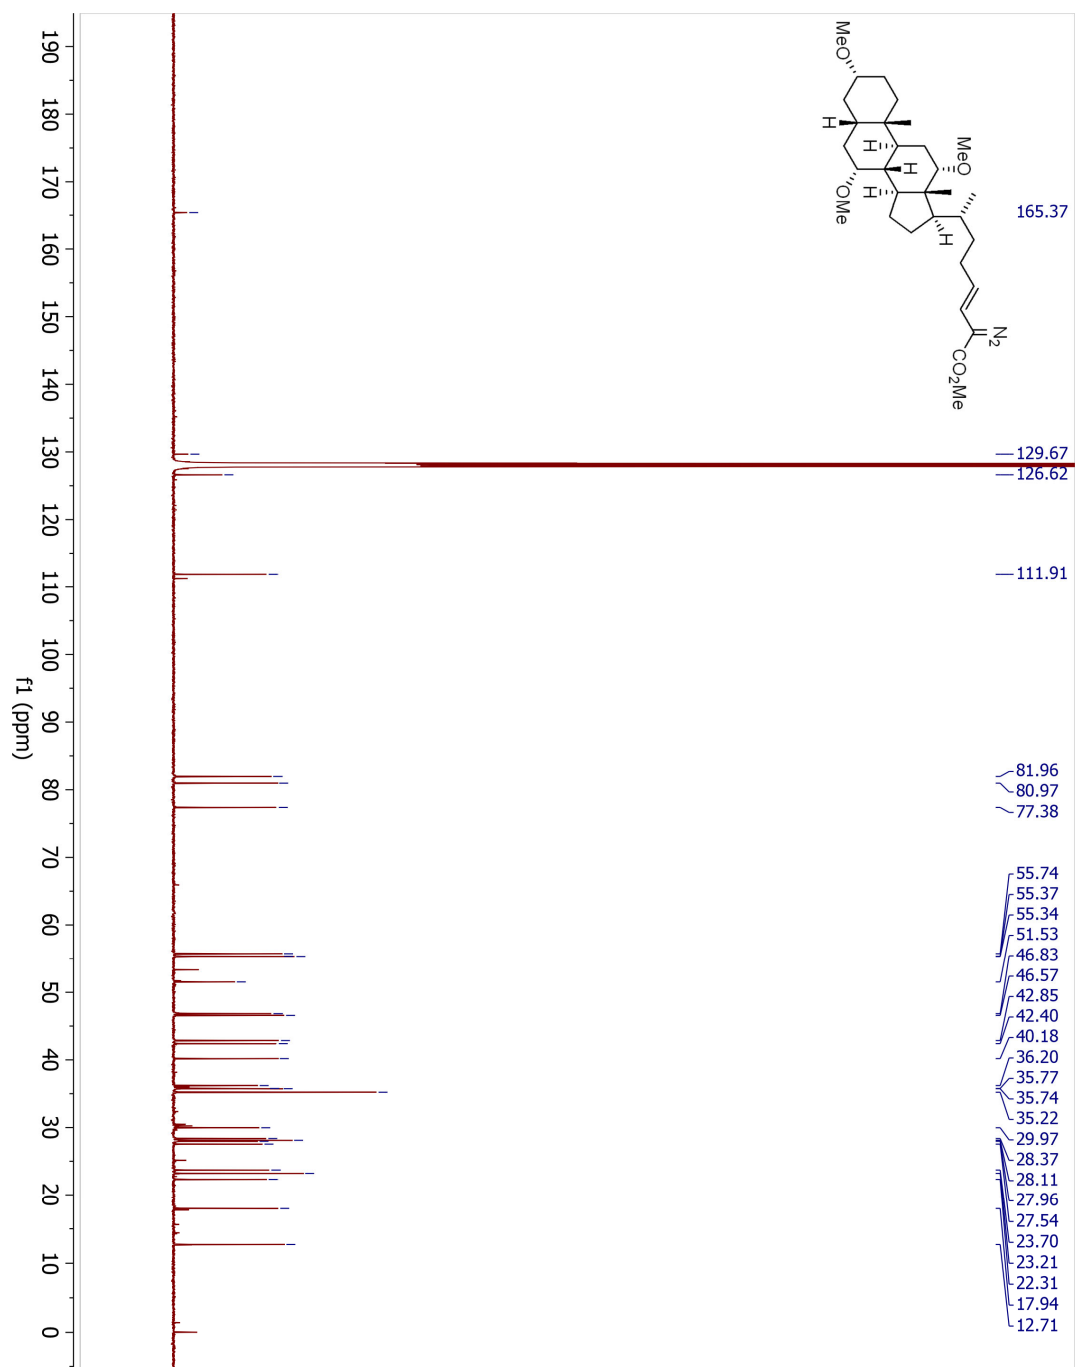

**Supplementary Figure 100.**  $^1\text{H}$  NMR (500 MHz,  $\text{CH}_3\text{CN}-d_3$ ) for **12b**

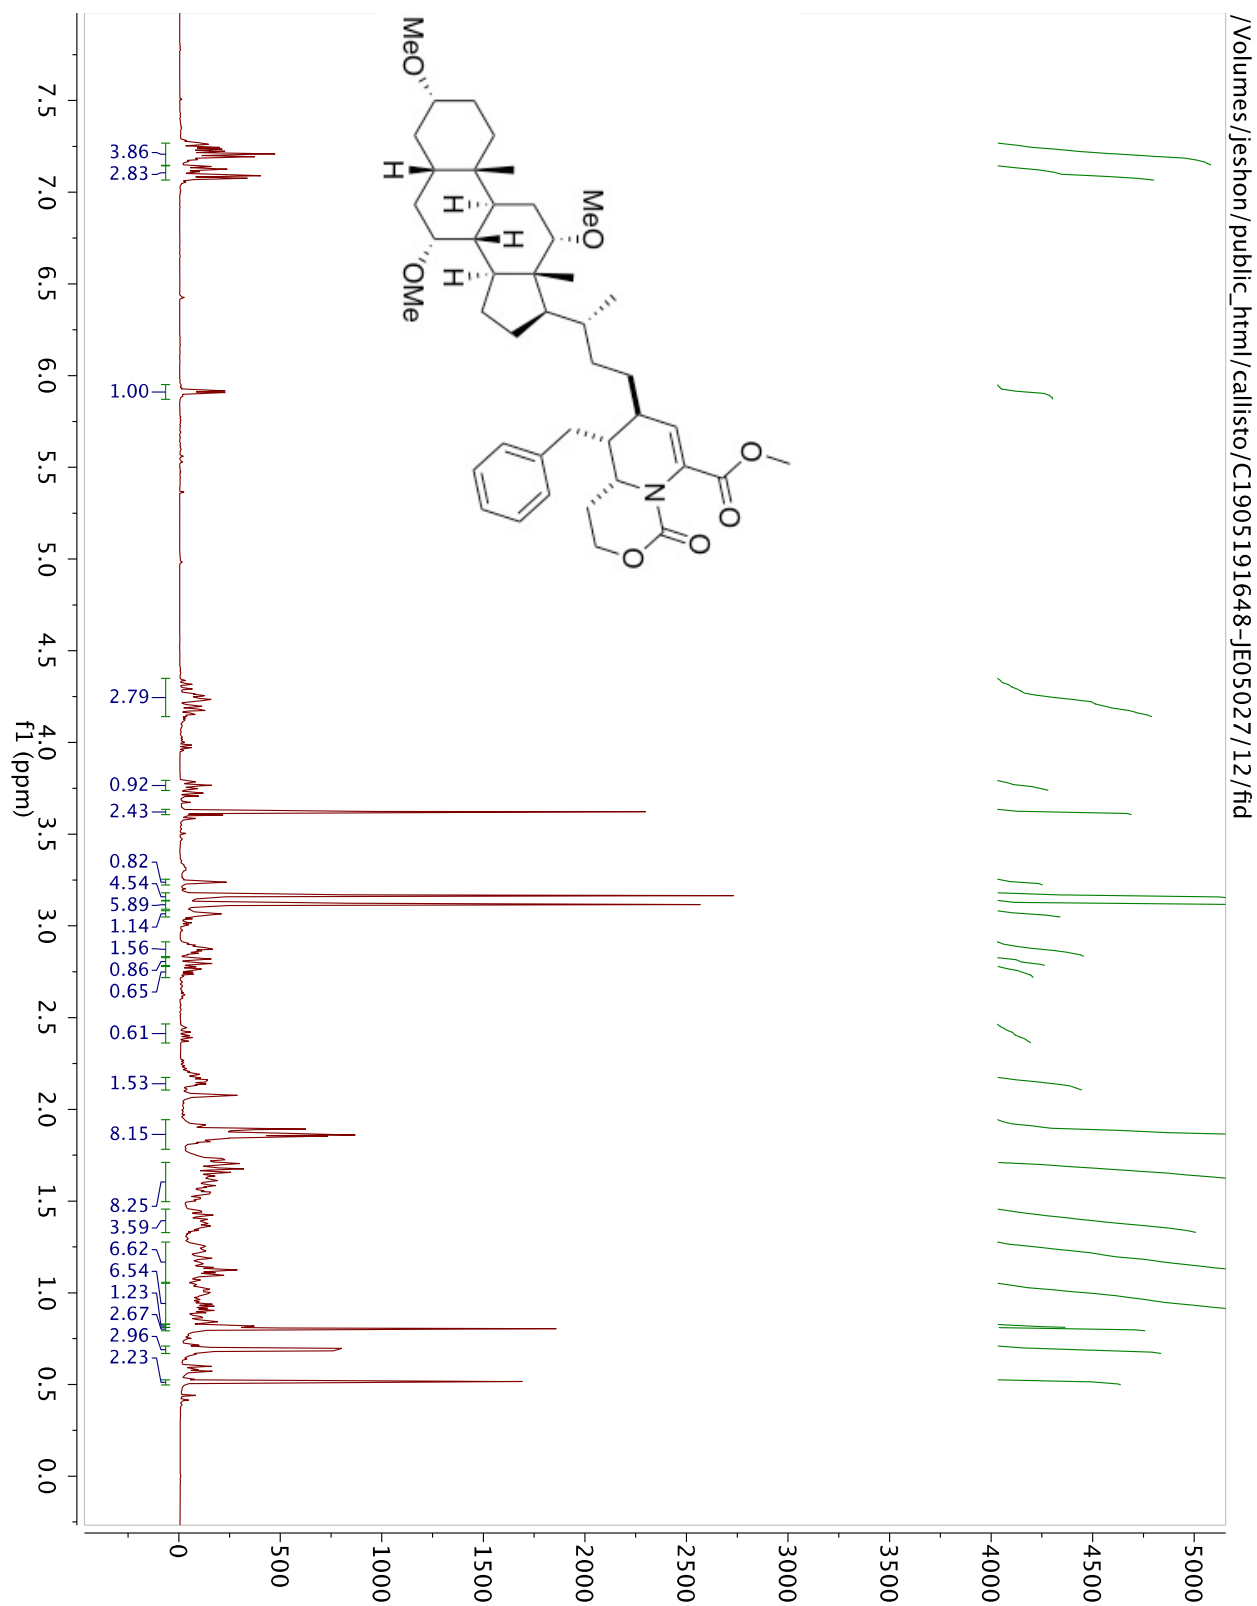

Supplementary Figure 101.  $^{13}\text{C}$  NMR (126 MHz,  $\text{CH}_3\text{CN}$ ) for compound 12b

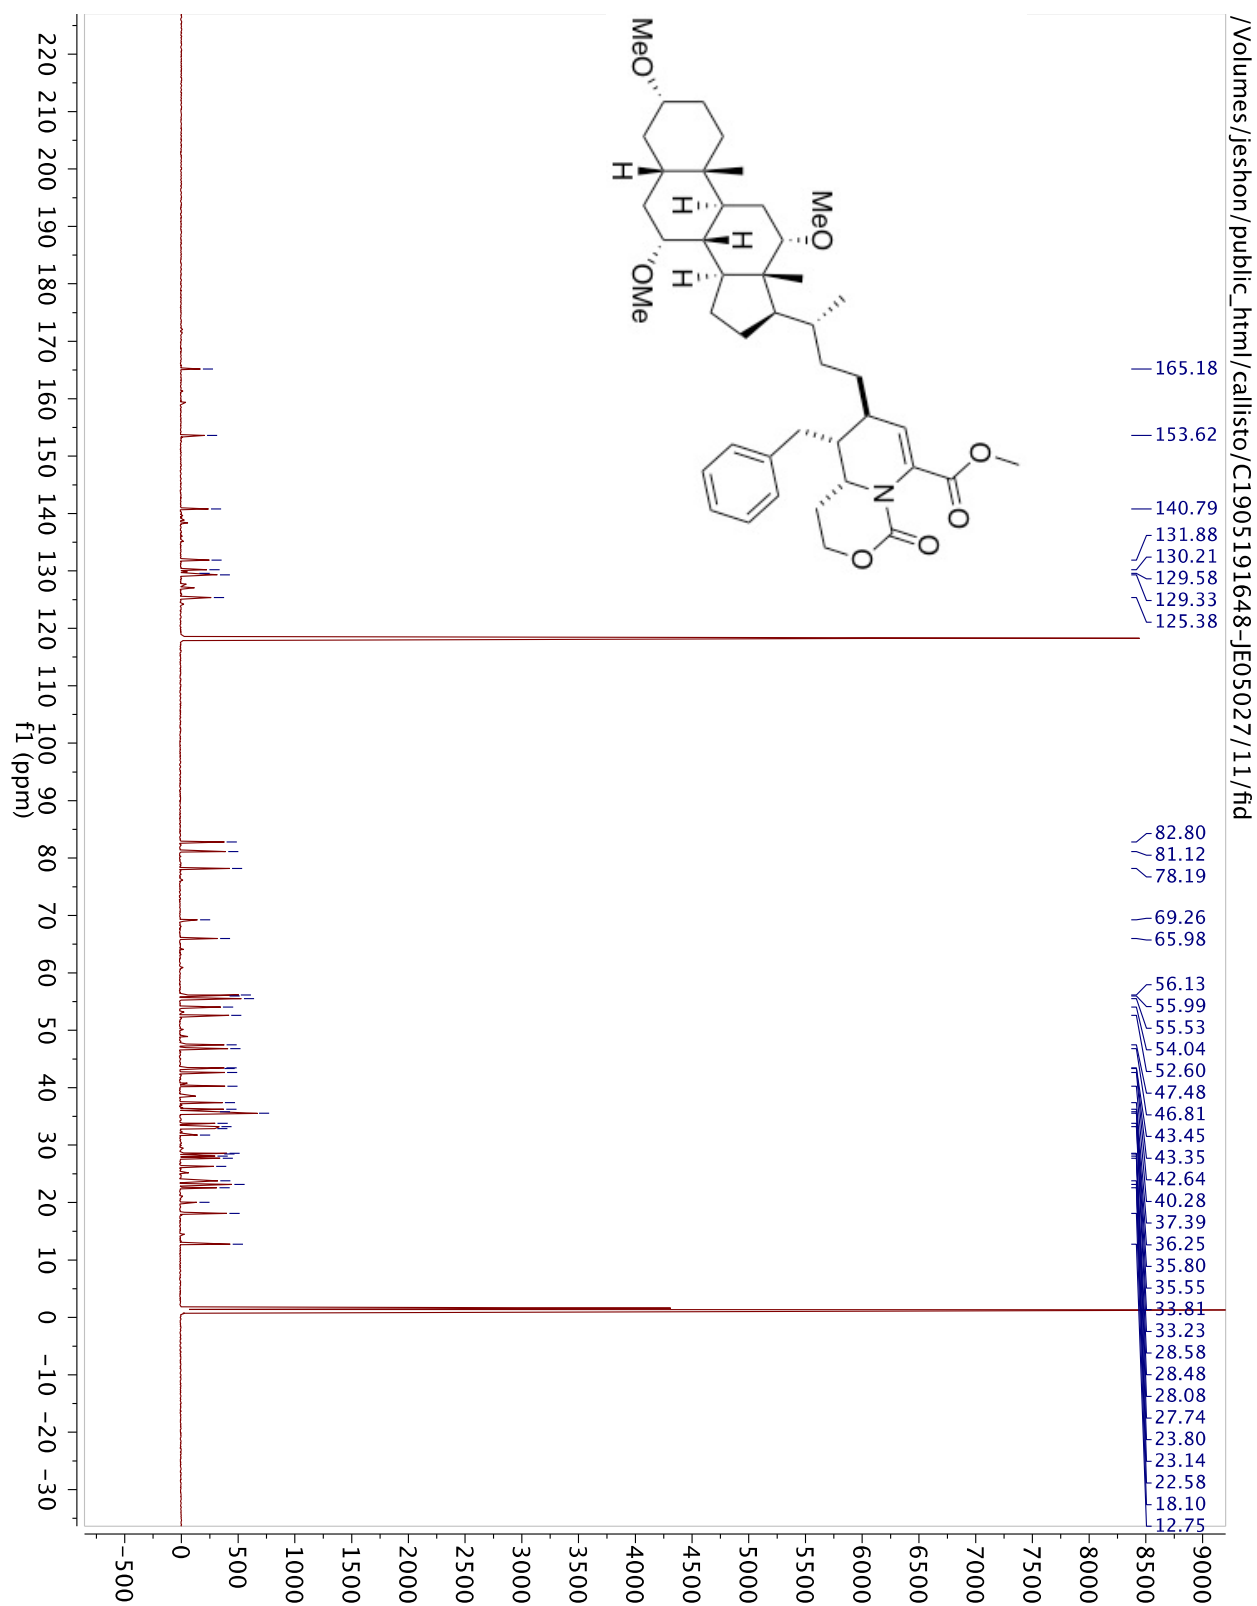

## Supplementary References

1. Armarego, W.L.F. & Chai, C.L.L. Purification of Laboratory Chemicals 6th ed., Elsevier: Burlington, MA (2009).
2. Still, W. C., Kahn, M. & Mitra, A. Rapid chromatographic technique for preparative separations with moderate resolution. *J. Org. Chem.* **43**, 2923-2925 (1978).
3. Ju, M., Weatherly, C. D., Guzei, I. A. & Schomaker, J. M. Chemo- and Enantioselective Intramolecular Silver-catalyzed Aziridinations. *Angew. Chem. Int. Ed.* **56**, 9944-9948 (2017).
4. Lebel, H., Lectard, S. & Parmentier, M. Copper-Catalyzed Alkene Aziridination with N-Tosyloxycarbamates. *Org. Lett.* **9**, 4797-4800 (2007).
5. Lebel, H., Huard, K. & Lectard, S. N-Tosyloxycarbamates as a Source of Metal Nitrenes: Rhodium-Catalyzed C-H Insertion and Aziridination Reactions. *J. Am. Chem. Soc.* **127**, 141989-14199 (2005).
6. Manning, J. R. & Davies, H. M. L. One-flask synthesis of methyl arylvinyl diazoacetates and their application in enantioselective C-H functionalization: synthesis of (E)-methyl 2-diazo-4-phenylbut-3-enoate and (S,E)methyl 2-((R)-4-methyl-1,2-dihydronaphthalen-2-yl)-4-phenylbut-3-enoate. *Org. Synth.* **84**, 334-346 (2007).
7. Walji, A. M. & Davies, H. M. L. Direct Synthesis of (+)-Erogorgiaene through a Kinetic Enantiodifferentiating Step. *Angew. Chem. Int. Ed.* **44**, 1733-1735 (2005).
8. Johnson, R. L. Inhibition of renin by substrate analog inhibitors containing the olefinic amino acid 5 (S)-amino-7-methyl-3 (E)-octenoic acid. *J. Med. Chem.* **27**, 1351-1354 (1984).
9. Hudspeth, J. P.; Lunney, E. A.; Michniewicz, E. D.; Repine, J. T.; Roark, W. H.; Stier, M. A.; Tinney, F. J.; Woo, P. K. W.; Essenburg, A. D.; Kaltenbronn J. S. Renin inhibitors containing isosteric replacements of the amide bond connecting the P3 and P2 sites. *J. Med. Chem.* **33**, 838-845 (1990).
10. Jenmalm, A.; Berts, W.; Li, Y. L.; Luthman, K.; Csöregi, I.; Hacksell, U. Stereoselective Epoxidation of Phe-Gly and Phe-Phe Vinyl Isosteres. *J. Org. Chem.* **59**, 1139-1148 (1994).
11. Bruker-AXS (2016). *APEX3*. Version 2016.5-0. Madison, Wisconsin, USA.
12. Krause, L., Herbst-Irmer, R., Sheldrick, G. M. & Stalke, D. Comparison of Silver and Molybdenum Microfocus X-ray Sources for Single-Crystal Structure Determination. *J. Appl. Cryst.* **48**, 3-10 (2015).
13. Sheldrick, G. M. (2013b). *XPREF*. Version 2013/1. Georg-August-Universität Göttingen, Göttingen, Germany.
14. Sheldrick, G. M. (2013a). The *SHELX* homepage, <http://shelx.uni-ac.gwdg.de/SHELX/>.

15. Sheldrick, G. M. SHELXT – Integrated space-group and crystal-structure determination. *Acta Cryst. A* **71**, 3-8 (2015a).
16. Sheldrick, G. M. Crystal structure refinement with SHELXL. *Acta Cryst. C* **71**, 3-8 (2015b).
17. Dolomanov, O. V., Bourhis, L. J., Gildea, R. J., Howard, J. A. K. & Puschmann, H. OLEX2: a complete structure solution, refinement and analysis program. *J. Appl. Crystallogr.* **42**, 339-341 (2009).
18. Guzei, I. A. (2007-2013). Programs *Gn*. University of Wisconsin-Madison, Madison, Wisconsin, USA.
19. Gaussian 09, Revision D.01, Frisch, M. J.; Trucks, G. W.; Schlegel, H. B.; Scuseria, G. E.; Robb, M. A.; Cheeseman, J. R.; Scalmani, G.; Barone, V.; Mennucci, B.; Petersson, G. A.; Nakatsuji, H.; Caricato, M.; Li, X.; Hratchian, H. P.; Izmaylov, A. F.; Bloino, J.; Zheng, G.; Sonnenberg, J. L.; Hada, M.; Ehara, M.; Toyota, K.; Fukuda, R.; Hasegawa, J.; Ishida, M.; Nakajima, T.; Honda, Y.; Kitao, O.; Nakai, H.; Vreven, T.; Montgomery, J. A., Jr.; Peralta, J. E.; Ogliaro, F.; Bearpark, M.; Heyd, J. J.; Brothers, E.; Kudin, K. N.; Staroverov, V. N.; Kobayashi, R.; Normand, J.; Raghavachari, K.; Rendell, A.; Burant, J. C.; Iyengar, S. S.; Tomasi, J.; Cossi, M.; Rega, N.; Millam, J. M.; Klene, M.; Knox, J. E.; Cross, J. B.; Bakken, V.; Adamo, C.; Jaramillo, J.; Gomperts, R.; Stratmann, R. E.; Yazyev, O.; Austin, A. J.; Cammi, R.; Pomelli, C.; Ochterski, J. W.; Martin, R. L.; Morokuma, K.; Zakrzewski, V. G.; Voth, G. A.; Salvador, P.; Dannenberg, J. J.; Dapprich, S.; Daniels, A. D.; Farkas, Ö.; Foresman, J. B.; Ortiz, J. V.; Cioslowski, J.; Fox, D. J. Gaussian, Inc., Wallingford CT, 2009.
20. Becke, A. D. Becke's three parameter hybrid method using the LYP correlation functional. *J. Chem. Phys.* **98**, 5648-5652 (1993).
21. Lee, C.; Yang, W.; Parr, R. G. Development of the Colle-Salvetti correlation-energy formula into a functional of the electron density. *Phys. Rev. B* **37**, 785-789 (1998).
22. Vosko, S. H.; Wilk, L.; Nusair, M. Accurate spin-dependent electron liquid correlation energies for local spin density calculations: a critical analysis. *Can. J. Phys.* **58**, 1200-1211 (1980).
23. Grimme, S.; Antony, J.; Ehrlich, S.; Krieg, H. A consistent and accurate ab initio parametrization of density functional dispersion correction (DFT-D) for the 94 elements H-Pu. *J. Chem. Phys.* **132**, 154104-154123 (2010).
24. Weigend, F.; Ahlrichs, R. Balanced basis sets of split valence, triple zeta valence and quadruple zeta valence quality for H to Rn: Design and assessment of accuracy. *Phys. Chem. Chem. Phys.* **7**, 3297-3305 (2005).
25. McIver, J. W.; Komornicki, A. K. Structure of transition states in organic reactions. General theory and an application to the cyclobutene-butadiene

- isomerization using a semiempirical molecular orbital method. *J. Am. Chem. Soc.* **94**, 2625-2633 (1972).
26. González, C.; Schlegel, H. B. Reaction path following in mass-weighted internal coordinates. *J. Phys. Chem.* **94**, 5523-5527 (1990).
27. Chu, L.; Ohta, C.; Zuo, Z.; MacMillan, D. W. C. Carboxylic acids as a traceless activation group for conjugate additions: a three-step synthesis of (±)-pregabalin. *J. Am. Chem. Soc.* **136**, 10886-10889 (2014).
